# Supplementary material for: Genes of the Pig, Sus scrofa, reconstructed with EvidentialGene
Source: bioRxiv preprint, doi:10.1101/412130, version 3 (2018-12-28)
Supplement: Supplemental Table 2 [file 412130_file03.xlsx]

## Sheet: Sheet 1 - Supplemental Table 2,
Supplemental Table 2, pig18evg_datadesc v2, human gene proteins aligned to pig gene sets from Evigene, NCBI, Ensembl of 2018
Human_ID	AAsize	Evigene_pig_ID	EvAlign	NCBI_pig_ID	NcAlign	Ensembl_pig_ID	SmAlign	Flags	Human_Gene_Name
hum:NP_001254479.2	35991	Susscr4EVm000001t1	30600	ncbi:XP_020931560.1	31391	0	0	Nc,Ev,Sm,Smmi,Smlo,	TTN,titin isoform IC
hum:XP_024308863.1	34137	Susscr4EVm000001t2	29935	ncbi:XP_020931560.1	33412	0	0	Nc,Ev,Sm,Evlo,Smmi,Smlo,	TTN,titin isoform X3
hum:XP_024308865.1	33062	Susscr4EVm000001t4	29743	ncbi:XP_020931560.1	33244	0	0	Nc,Ev,Sm,Evlo,Smmi,Smlo,	TTN,titin isoform X8
hum:NP_078966.2	14507	Susscr4EVm000049t1	3834	ncbi:XP_020940777.1	4740	ENSSSCP00000014575.3	260	Nc,Ev,Sm,Evlo,Smmi,Smlo,	MUC16,mucin-16
hum:XP_016882975.1	14257	Susscr4EVm000049t4	3124	ncbi:XP_020940777.1	4743	ENSSSCP00000014575.3	260	Nc,Ev,Sm,Evfr,Evlo,Smmi,Smlo,	MUC16,mucin-16 isoform X1
hum:XP_016857932.1	9042	Susscr4EVm000005t1	7429	ncbi:XP_020939017.1	8434	ENSSSCP00000052588.1	1928	Nc,Ev,Sm,Evlo,Smfr,Smlo,	OBSCN,obscurin isoform X1
hum:XP_016857938.1	8954	Susscr4EVm000005t1	7432	ncbi:XP_020939025.1	8349	ENSSSCP00000052588.1	1928	Nc,Ev,Sm,Evlo,Smfr,Smlo,	OBSCN,obscurin isoform X8
hum:XP_005273355.1	8924	Susscr4EVm000005t1	7399	ncbi:XP_020939023.1	8322	ENSSSCP00000052588.1	1928	Nc,Ev,Sm,Evlo,Smfr,Smlo,	OBSCN,obscurin isoform X17
hum:XP_016857947.1	8866	Susscr4EVm000005t1	7436	ncbi:XP_020939003.1	8297	ENSSSCP00000052588.1	1928	Nc,Ev,Sm,Evlo,Smfr,Smlo,	OBSCN,obscurin isoform X18
hum:XP_006715470.1	8846	Susscr4EVm000002t1	8881	ncbi:XP_020940069.1	8864	ENSSSCP00000005492.3	6659	Ev,Nc,Sm,Smlo,	SYNE1,nesprin-1 isoform X1
hum:XP_016857953.1	8834	Susscr4EVm000005t1	7398	ncbi:XP_020939005.1	8275	ENSSSCP00000052588.1	1928	Nc,Ev,Sm,Evlo,Smfr,Smlo,	OBSCN,obscurin isoform X25
hum:XP_016857954.1	8778	Susscr4EVm000005t1	7433	ncbi:XP_020939018.1	8216	ENSSSCP00000052588.1	1928	Nc,Ev,Sm,Smfr,Smlo,	OBSCN,obscurin isoform X27
hum:XP_016857957.1	8690	Susscr4EVm000005t1	7260	ncbi:XP_020939006.1	8535	ENSSSCP00000052588.1	1928	Nc,Ev,Sm,Evlo,Smfr,Smlo,	OBSCN,obscurin isoform X30
hum:NP_001258137.1	8560	Susscr4EVm000008t2	6572	ncbi:XP_020931125.1	7190	ENSSSCP00000057830.1	5587	Nc,Ev,Sm,Smlo,	NEB,nebulin isoform 4
hum:XP_005246647.1	8494	Susscr4EVm000008t1	6731	ncbi:XP_020931125.1	7214	ENSSSCP00000057830.1	5531	Nc,Ev,Sm,Smlo,	NEB,nebulin isoform X1
hum:NP_775871.2	8384	Susscr4EVm001304t1	1202	ncbi:NP_001106757.1	2145	ENSSSCP00000025747.2	1409	Nc,Sm,Ev,Smfr,Smlo,Evfr,Evlo,	MUC19,mucin-19 precursor
hum:XP_011542599.1	8305	Susscr4EVm000005t1	7217	ncbi:XP_020939013.1	8393	0	0	Nc,Ev,Sm,Evlo,Smmi,Smlo,	OBSCN,obscurin isoform X33
hum:XP_011509527.1	8277	Susscr4EVm000008t6	6505	ncbi:XP_020931125.1	7316	ENSSSCP00000057830.1	5661	Nc,Ev,Sm,Evlo,Smlo,	NEB,nebulin isoform X29
hum:XP_016857959.1	8074	Susscr4EVm000005t3	7248	ncbi:XP_020939027.1	8180	0	0	Nc,Ev,Sm,Evlo,Smmi,Smlo,	OBSCN,obscurin isoform X34
hum:XP_005246673.1	8018	Susscr4EVm000008t7	6246	ncbi:XP_020931125.1	7274	ENSSSCP00000057830.1	5269	Nc,Ev,Sm,Evlo,Smlo,	NEB,nebulin isoform X33
hum:XP_016866694.1	7827	Susscr4EVm000003t1	7847	ncbi:XP_013833199.1	7837	ENSSSCP00000033447.1	7837	Ev,Nc,Sm,na	DST,dystonin isoform X1
hum:XP_016866696.1	7806	Susscr4EVm000003t1	7826	ncbi:XP_020954224.1	7837	ENSSSCP00000033447.1	7837	EQ,Sm,Ev,na	DST,dystonin isoform X4
hum:XP_005249373.1	7723	Susscr4EVm000003t58	7574	ncbi:XP_013833211.2	7808	ENSSSCP00000038187.1	7808	EQ,Sm,Ev,na	DST,dystonin isoform X12
hum:XP_005270751.1	7723	Susscr4EVm000004t1	7732	ncbi:XP_013833199.1	6121	ENSSSCP00000038187.1	6121	Ev,Nc,Sm,Nclo,Smlo,	MACF1,microtubule-actin cross-linking factor 1 isoform X1
hum:XP_016866702.1	7718	Susscr4EVm000003t1	7251	ncbi:XP_020954234.1	7728	ENSSSCP00000043424.1	7728	EQ,Sm,Ev,na	DST,dystonin isoform X13
hum:XP_016857960.1	7693	Susscr4EVm000001t5	6799	ncbi:XP_020939034.1	6948	ENSSSCP00000052588.1	1928	Nc,Ev,Sm,Smfr,Smlo,	OBSCN,obscurin isoform X35
hum:XP_005249375.1	7680	Susscr4EVm000003t10	7703	ncbi:XP_013833209.1	7690	ENSSSCP00000039754.1	7690	Ev,Nc,Sm,na	DST,dystonin isoform X16
hum:XP_005249376.1	7647	Susscr4EVm000003t10	7670	ncbi:XP_020954236.1	7690	ENSSSCP00000033447.1	7689	EQ,Sm,Ev,na	DST,dystonin isoform X18
hum:XP_005249377.1	7640	Susscr4EVm000003t10	7656	ncbi:XP_005665924.1	7650	ENSSSCP00000001627.3	7650	EQ,Nc,Sm,na	DST,dystonin isoform X19
hum:XP_005249379.1	7633	Susscr4EVm000003t10	7644	ncbi:XP_020954240.1	7643	ENSSSCP00000033447.1	7620	EQ,Nc,Sm,na	DST,dystonin isoform X20
hum:XP_016866706.1	7619	Susscr4EVm000003t10	7635	ncbi:XP_020954239.1	7650	ENSSSCP00000033447.1	7632	Nc,Ev,Sm,na	DST,dystonin isoform X21
hum:XP_005249380.1	7607	Susscr4EVm000003t11	7629	ncbi:XP_020954239.1	7650	ENSSSCP00000033447.1	7632	Nc,Sm,Ev,na	DST,dystonin isoform X22
hum:XP_006710589.1	7595	Susscr4EVm000004t4	7577	ncbi:XP_020954224.1	6309	ENSSSCP00000033447.1	6309	Ev,Nc,Sm,Nclo,Smlo,	MACF1,microtubule-actin cross-linking factor 1 isoform X14
hum:XP_006710591.1	7558	Susscr4EVm000004t10	7567	ncbi:XP_020954224.1	6263	ENSSSCP00000033447.1	6263	Ev,Nc,Sm,Nclo,Smlo,	MACF1,microtubule-actin cross-linking factor 1 isoform X15
hum:XP_006710598.1	7553	Susscr4EVm000004t4	7581	ncbi:XP_013833210.1	6295	ENSSSCP00000001627.3	6295	Ev,Nc,Sm,Nclo,Smlo,	MACF1,microtubule-actin cross-linking factor 1 isoform X16
hum:XP_006710592.1	7544	Susscr4EVm000004t4	7550	ncbi:XP_020954240.1	6274	ENSSSCP00000033447.1	6262	Ev,Nc,Sm,Nclo,Smlo,	MACF1,microtubule-actin cross-linking factor 1 isoform X17
hum:XP_011513128.1	7461	Susscr4EVm000003t48	7064	ncbi:XP_020954234.1	7523	ENSSSCP00000043424.1	7523	EQ,Sm,Ev,na	DST,dystonin isoform X34
hum:NP_001309397.1	7418	Susscr4EVm004114t1	741	ncbi:XP_020923932.1	1174	ENSSSCP00000051590.1	1159	Nc,Sm,Ev,Evfr,Evlo,	MUC4,mucin-4 isoform f precursor
hum:XP_016857962.1	7362	Susscr4EVm000001t2	6693	ncbi:XP_020939013.1	6711	ENSSSCP00000052588.1	1928	Nc,Ev,Sm,Smfr,Smlo,	OBSCN,obscurin isoform X37
hum:XP_005249381.1	7281	Susscr4EVm000003t10	7260	ncbi:XP_013833213.1	7291	ENSSSCP00000052999.1	7291	EQ,Sm,Ev,na	DST,dystonin isoform X24
hum:NP_001139669.1	7081	Susscr4EVm001629t1	1166	ncbi:XP_020921551.1	5921	ENSSSCP00000010177.3	1805	Nc,Sm,Ev,Smfr,Smlo,Evfr,Evlo,	CCDC168,coiled-coil domain-containing protein 168
hum:XP_006711890.1	6957	Susscr4EVm000005t21	5885	ncbi:XP_020939013.1	6606	ENSSSCP00000052588.1	1928	Nc,Ev,Sm,Evlo,Smfr,Smlo,	OBSCN,obscurin isoform X38
hum:XP_011534876.1	6936	Susscr4EVm000007t1	6952	ncbi:XP_005660096.2	6951	ENSSSCP00000055128.1	6951	EQ,Nc,Sm,na	SYNE2,nesprin-2 isoform X1
hum:NP_775922.3	6907	Susscr4EVm000175t1	2687	ncbi:XP_020935527.1	7049	ENSSSCP00000052227.1	6993	Nc,Sm,Ev,Evfr,Evlo,	FSIP2,fibrous sheath-interacting protein 2
hum:XP_006711892.1	6865	Susscr4EVm000005t21	5885	ncbi:XP_020939031.1	6932	ENSSSCP00000052588.1	1927	Nc,Ev,Sm,Evlo,Smfr,Smlo,	OBSCN,obscurin isoform X40
hum:XP_016865452.1	6313	Susscr4EVm000070t1	3472	ncbi:XP_020941033.1	6331	ENSSSCP00000046433.1	5959	Nc,Sm,Ev,Evfr,Evlo,	ADGRV1,G-protein coupled receptor 98 isoform X1
hum:XP_016865454.1	6312	Susscr4EVm000070t1	3472	ncbi:XP_020941031.1	6324	ENSSSCP00000046433.1	5959	Nc,Sm,Ev,Evfr,Evlo,	ADGRV1,G-protein coupled receptor 98 isoform X3
hum:XP_016856368.1	5998	Susscr4EVm000004t43	6032	ncbi:XP_013833199.1	4677	ENSSSCP00000001627.3	4677	Ev,Nc,Sm,Nclo,Smlo,	MACF1,microtubule-actin cross-linking factor 1 isoform X21
hum:NP_001333374.1	5890	Susscr4EVm000071t1	3365	ncbi:XP_013849669.2	6301	ENSSSCP00000039377.1	3828	Nc,Sm,Ev,Smfr,Smlo,Evfr,Evlo,	AHNAK,neuroblast differentiation-associated protein AHNAK isoform 1
hum:NP_002449.2	5762	Susscr4EVm000145t1	1767	ncbi:XP_020938146.1	4148	ENSSSCP00000054766.1	4082	Nc,Sm,Ev,Evfr,Evlo,	MUC5B,mucin-5B precursor
hum:XP_016866708.1	5741	Susscr4EVm000003t65	5745	ncbi:XP_005665927.1	5745	ENSSSCP00000054118.1	4462	EQ,Nc,Sm,Smlo,	DST,dystonin isoform X26
hum:XP_016866709.1	5699	Susscr4EVm000003t65	5703	ncbi:XP_020954243.1	5736	ENSSSCP00000054118.1	4462	Nc,Ev,Sm,Smlo,	DST,dystonin isoform X27
hum:XP_006710599.1	5656	Susscr4EVm000004t68	5656	ncbi:XP_020954243.1	5399	ENSSSCP00000043424.1	5070	Ev,Nc,Sm,Smlo,	MACF1,microtubule-actin cross-linking factor 1 isoform X23
hum:XP_016866711.1	5637	Susscr4EVm000003t70	5546	ncbi:XP_020951642.1	5399	ENSSSCP00000054118.1	4462	Ev,Nc,Sm,Smlo,	DST,dystonin isoform X30
hum:NP_114141.2	5635	Susscr4EVm000010t1	5636	ncbi:XP_020958297.1	5636	ENSSSCP00000054333.1	5636	EQ,Nc,Sm,na	HMCN1,hemicentin-1 precursor
hum:XP_016866712.1	5632	Susscr4EVm000003t65	5159	ncbi:XP_020954246.1	5431	ENSSSCP00000033447.1	4810	Nc,Ev,Sm,Smlo,	DST,dystonin isoform X31
hum:NP_596870.2	5604	Susscr4EVm000001t39	5622	ncbi:XP_020931560.1	4381	0	0	Ev,Nc,Sm,Nclo,Smmi,Smlo,	TTN,titin isoform novex-3
hum:NP_055426.1	5596	Susscr4EVm000011t1	5612	ncbi:XP_020945634.1	5612	ENSSSCP00000004672.3	5609	EQ,Nc,Sm,na	MDN1,midasin
hum:XP_011537072.1	5556	Susscr4EVm000009t5	4047	ncbi:XP_020947252.1	4042	ENSSSCP00000027568.2	3504	EQ,Nc,Sm,Smlo,	KMT2D,histone-lysine N-methyltransferase 2D isoform X1
hum:XP_011537076.1	5549	Susscr4EVm000009t18	3623	ncbi:XP_020947252.1	4042	ENSSSCP00000027568.2	3504	Nc,Ev,Sm,Evlo,Smlo,	KMT2D,histone-lysine N-methyltransferase 2D isoform X5
hum:XP_006719677.1	5540	Susscr4EVm000009t5	4047	ncbi:XP_020934780.1	2686	ENSSSCP00000027568.2	3504	Ev,Sm,Nc,Smlo,Nclo,	KMT2D,histone-lysine N-methyltransferase 2D isoform X6
hum:NP_001138242.1	5537	Susscr4EVm000003t83	5586	ncbi:XP_020954243.1	5597	ENSSSCP00000054118.1	4462	Nc,Ev,Sm,Smlo,	DST,dystonin isoform 3
hum:NP_003473.3	5537	Susscr4EVm000009t2	4042	ncbi:XP_020947252.1	4039	ENSSSCP00000027568.2	3504	EQ,Nc,Sm,Smlo,	KMT2D,histone-lysine N-methyltransferase 2D
hum:XP_006719679.1	5536	Susscr4EVm000009t1	4041	ncbi:XP_020947252.1	4039	ENSSSCP00000027568.2	3503	EQ,Nc,Sm,Smlo,	KMT2D,histone-lysine N-methyltransferase 2D isoform X8
hum:XP_011537078.1	5525	Susscr4EVm000009t7	4011	ncbi:XP_020947252.1	4042	ENSSSCP00000027568.2	3504	Nc,Ev,Sm,Smlo,	KMT2D,histone-lysine N-methyltransferase 2D isoform X9
hum:XP_011508340.1	5518	Susscr4EVm000010t10	5519	ncbi:XP_020958298.1	5519	ENSSSCP00000056468.1	5519	EQ,Nc,Sm,na	HMCN1,hemicentin-1 isoform X1
hum:NP_003881.2	5405	Susscr4EVm000352t1	2121	ncbi:XP_020950035.1	2588	ENSSSCP00000054201.1	2558	Nc,Sm,Ev,Evlo,	FCGBP,IgGFc-binding protein precursor
hum:XP_016866713.1	5375	Susscr4EVm000004t70	4968	ncbi:XP_020954246.1	5379	ENSSSCP00000033447.1	4609	Nc,Ev,Sm,Smlo,	DST,dystonin isoform X32
hum:NP_001157934.1	5335	Susscr4EVm002515t1	400	ncbi:XP_020943636.1	367	0	0	Ev,Nc,Sm,Smmi,Smlo,	MUC12,mucin-12 precursor
hum:NP_002448.4	5289	Susscr4EVm000145t1	1763	ncbi:NP_001233150.1	1763	ENSSSCP00000045466.1	2396	Sm,Ev,Nc,Evlo,Nclo,	MUC2,mucin-2 precursor
hum:XP_011539410.2	5272	Susscr4EVm000013t1	5235	ncbi:XP_020951123.1	5235	ENSSSCP00000003786.3	5234	EQ,Nc,Sm,na	UBR4,E3 ubiquitin-protein ligase UBR4 isoform X1
hum:XP_005257602.2	5256	Susscr4EVm000012t1	5317	0	0	ENSSSCP00000018165.3	4931	Ev,Sm,Nc,Ncmi,Nclo,	RNF213,E3 ubiquitin-protein ligase RNF213 isoform X1
hum:NP_001265196.1	5207	Susscr4EVm106053t3	61	ncbi:XP_020937561.1	237	0	0	Nc,Ev,Sm,Evfr,Evlo,Smmi,Smlo,	NBPF20,neuroblastoma breakpoint family member 20
hum:NP_996816.2	5202	Susscr4EVm003693t1	795	ncbi:XP_020919951.1	5200	ENSSSCP00000051987.1	5207	EQ,Nc,Ev,Evfr,Evlo,	USH2A,usherin isoform B precursor
hum:XP_011521448.1	5182	Susscr4EVm000014t1	5161	ncbi:XP_020949473.1	5161	ENSSSCP00000033349.1	5160	EQ,Nc,Sm,na	HYDIN,hydrocephalus-inducing protein homolog isoform X1
hum:NP_056363.2	5171	Susscr4EVm000003t83	5165	ncbi:XP_003128386.1	5175	ENSSSCP00000054118.1	4462	Nc,Ev,Sm,Smlo,	DST,dystonin isoform 1eA precursor
hum:NP_940857.2	5147	Susscr4EVm005191t1	658	ncbi:XP_020934406.1	5212	ENSSSCP00000045777.1	5183	Nc,Sm,Ev,Evfr,Evlo,	SSPO,SCO-spondin precursor
hum:NP_149015.2	5142	Susscr4EVm000218t1	2484	ncbi:XP_020919143.1	5201	ENSSSCP00000038021.1	2762	Nc,Sm,Ev,Smfr,Smlo,Evfr,Evlo,	PCLO,protein piccolo isoform 1
hum:XP_016869378.1	5121	Susscr4EVm000006t116	1942	ncbi:XP_020946053.1	4583	ENSSSCP00000039606.1	4571	Nc,Sm,Ev,Evfr,Evlo,	EPPK1,epiplakin isoform X1
hum:XP_011530621.1	5093	Susscr4EVm000015t1	5093	ncbi:XP_020957277.1	5093	ENSSSCP00000038338.1	5093	EQ,Nc,Sm,na	KIAA1109,uncharacterized protein KIAA1109 isoform X1
hum:NP_001278744.1	5079	Susscr4EVm000016t1	5075	ncbi:XP_013849388.2	5075	ENSSSCP00000006106.3	5104	Sm,Ev,Nc,na	HMCN2,hemicentin-2 precursor
hum:XP_011513432.1	5059	Susscr4EVm000253t1	2251	ncbi:XP_020919564.1	2956	ENSSSCP00000056629.1	4544	Sm,Nc,Ev,Ncfr,Nclo,Evfr,Evlo,	ABCA13,ATP-binding cassette sub-family A member 13 isoform X1
hum:NP_000531.2	5038	Susscr4EVm000017t4	5061	ncbi:NP_001001534.1	5042	ENSSSCP00000046204.1	4935	Ev,Nc,Sm,na	RYR1,ryanodine receptor 1 isoform 1
hum:XP_011513433.1	5028	Susscr4EVm000253t1	2254	ncbi:XP_020919563.1	2903	ENSSSCP00000056629.1	4544	Sm,Nc,Ev,Ncfr,Nclo,Evfr,Evlo,	ABCA13,ATP-binding cassette sub-family A member 13 isoform X2
hum:XP_011513434.1	5028	Susscr4EVm000096t2	2200	ncbi:XP_020919564.1	2956	ENSSSCP00000056629.1	4513	Sm,Nc,Ev,Ncfr,Nclo,Evfr,Evlo,	ABCA13,ATP-binding cassette sub-family A member 13 isoform X3
hum:XP_006711865.1	4985	Susscr4EVm000018t2	4986	ncbi:XP_020928342.1	4997	ENSSSCP00000046204.1	5031	Sm,Nc,Ev,na	RYR2,ryanodine receptor 2 isoform X1
hum:NP_001278232.1	4983	Susscr4EVm000020t1	4983	ncbi:XP_020957270.1	4983	ENSSSCP00000036339.1	4983	EQ,Nc,Sm,na	FAT4,protocadherin Fat 4 isoform 1 precursor
hum:XP_005250082.1	4983	Susscr4EVm000019t1	4997	ncbi:XP_020934780.1	4997	ENSSSCP00000039746.1	4997	EQ,Nc,Sm,na	KMT2C,histone-lysine N-methyltransferase 2C isoform X1
hum:XP_016857517.1	4978	Susscr4EVm000018t3	4986	ncbi:XP_020928342.1	4997	ENSSSCP00000046204.1	5024	Sm,Nc,Ev,na	RYR2,ryanodine receptor 2 isoform X3
hum:XP_006711867.1	4977	Susscr4EVm000018t1	4982	ncbi:XP_020928342.1	4997	ENSSSCP00000046204.1	5023	Sm,Nc,Ev,na	RYR2,ryanodine receptor 2 isoform X4
hum:XP_016878188.1	4909	Susscr4EVm000022t1	4909	ncbi:XP_020949597.1	4939	ENSSSCP00000038408.1	4909	Nc,Ev,Sm,na	HERC1,probable E3 ubiquitin-protein ligase HERC1 isoform X1
hum:XP_011514755.1	4904	Susscr4EVm000019t3	4970	ncbi:XP_020934790.1	4973	ENSSSCP00000051182.1	4939	EQ,Ev,Sm,na	KMT2C,histone-lysine N-methyltransferase 2C isoform X21
hum:XP_005264506.2	4884	Susscr4EVm000021t1	4888	ncbi:XP_020943315.1	4888	ENSSSCP00000009078.3	4891	EQ,Ev,Nc,na	BIRC6,baculoviral IAP repeat-containing protein 6 isoform X1
hum:XP_016877964.1	4837	Susscr4EVm000024t1	4838	ncbi:XP_020955566.1	4861	ENSSSCP00000010815.3	4925	Sm,Nc,Ev,na	RYR3,ryanodine receptor 3 isoform X10
hum:NP_004658.3	4834	Susscr4EVm000023t1	4872	ncbi:XP_020931002.1	4852	ENSSSCP00000044136.1	4852	Ev,Nc,Sm,na	HERC2,E3 ubiquitin-protein ligase HERC2
hum:XP_006719842.1	4797	Susscr4EVm000026t2	4800	ncbi:XP_020921391.1	4797	ENSSSCP00000050887.1	4672	EQ,Nc,Sm,na	MYCBP2,E3 ubiquitin-protein ligase MYCBP2 isoform X1
hum:XP_006719843.1	4794	Susscr4EVm000026t1	4797	ncbi:XP_020921391.1	4797	ENSSSCP00000050887.1	4672	EQ,Nc,Sm,na	MYCBP2,E3 ubiquitin-protein ligase MYCBP2 isoform X2
hum:NP_653267.2	4753	Susscr4EVm002119t1	967	ncbi:XP_020917997.1	4795	ENSSSCP00000043379.1	3533	Nc,Sm,Ev,Smlo,Evfr,Evlo,	DNHD1,dynein heavy chain domain-containing protein 1 isoform 1
hum:XP_006720790.1	4748	Susscr4EVm000023t7	4770	ncbi:XP_020931002.1	4765	ENSSSCP00000044136.1	4765	EQ,Nc,Sm,na	HERC2,E3 ubiquitin-protein ligase HERC2 isoform X3
hum:XP_006719848.1	4737	Susscr4EVm000026t2	4766	ncbi:XP_020921396.1	4798	ENSSSCP00000048862.1	4664	Nc,Ev,Sm,na	MYCBP2,E3 ubiquitin-protein ligase MYCBP2 isoform X10
hum:XP_006710601.1	4720	Susscr4EVm000004t1	4723	ncbi:XP_005665924.1	3111	ENSSSCP00000038187.1	3111	Ev,Nc,Sm,Ncfr,Nclo,Smfr,Smlo,	MACF1,microtubule-actin cross-linking factor 1 isoform X26
hum:NP_001193856.1	4707	Susscr4EVm000039t1	4542	ncbi:XP_020954316.1	4710	ENSSSCP00000001722.3	4709	EQ,Sm,Ev,na	DNAH8,dynein heavy chain 8, axonemal
hum:XP_011520133.1	4705	Susscr4EVm000034t1	4658	ncbi:XP_020952823.1	4597	ENSSSCP00000005087.3	4773	Sm,Ev,Nc,na	STARD9,stAR-related lipid transfer protein 9 isoform X1
hum:XP_005251033.1	4689	Susscr4EVm000006t75	4713	ncbi:XP_020946026.1	4706	ENSSSCP00000059540.1	4554	EQ,Nc,Sm,na	PLEC,plectin isoform X3
hum:XP_005248319.2	4660	Susscr4EVm000035t1	4411	ncbi:XP_020954316.1	4655	ENSSSCP00000001722.3	4654	EQ,Sm,Ev,na	DNAH5,dynein heavy chain 5, axonemal isoform X1
hum:NP_004516.2	4655	Susscr4EVm000027t1	4639	ncbi:XP_020931970.1	4639	ENSSSCP00000034705.1	4647	EQ,Ev,Nc,na	LRP2,low-density lipoprotein receptor-related protein 2 precursor
hum:NP_001367.2	4646	Susscr4EVm000025t2	4711	ncbi:XP_020937243.1	4646	ENSSSCP00000010429.3	4592	Ev,Nc,Sm,na	DYNC1H1,cytoplasmic dynein 1 heavy chain 1
hum:XP_016875953.1	4637	Susscr4EVm000026t2	4676	ncbi:XP_020921393.1	4699	ENSSSCP00000048862.1	4574	Nc,Ev,Sm,na	MYCBP2,E3 ubiquitin-protein ligase MYCBP2 isoform X23
hum:XP_011512622.1	4628	Susscr4EVm000039t1	4542	ncbi:XP_020927878.1	4542	ENSSSCP00000010429.3	4542	EQ,Nc,Sm,na	DNAH8,dynein heavy chain 8, axonemal isoform X3
hum:NP_001360.1	4624	Susscr4EVm000035t1	4411	ncbi:XP_020932305.1	4631	ENSSSCP00000034025.1	4630	EQ,Sm,Ev,na	DNAH5,dynein heavy chain 5, axonemal
hum:XP_011542359.1	4617	Susscr4EVm000042t1	3690	ncbi:XP_020919920.1	4631	ENSSSCP00000019029.3	3870	Nc,Sm,Ev,Smlo,Evlo,	DNAH14,dynein heavy chain 14, axonemal isoform X1
hum:XP_016872667.1	4612	Susscr4EVm000028t10	4644	ncbi:NP_001177099.1	4642	ENSSSCP00000007459.3	4642	EQ,Nc,Sm,na	FAT3,protocadherin Fat 3 isoform X1
hum:XP_016875955.1	4603	Susscr4EVm000026t2	4676	ncbi:XP_020921401.1	4700	ENSSSCP00000050887.1	4540	Nc,Ev,Sm,na	MYCBP2,E3 ubiquitin-protein ligase MYCBP2 isoform X25
hum:XP_011513439.1	4602	Susscr4EVm000253t1	1795	ncbi:XP_020919556.1	2660	ENSSSCP00000056629.1	4085	Sm,Nc,Ev,Ncfr,Nclo,Evfr,Evlo,	ABCA13,ATP-binding cassette sub-family A member 13 isoform X7
hum:XP_005262891.1	4600	Susscr4EVm000028t2	4601	ncbi:XP_020957992.1	4605	ENSSSCP00000007459.3	4601	EQ,Ev,Sm,na	FAT1,protocadherin Fat 1 isoform X1
hum:NP_061027.2	4599	Susscr4EVm000031t33	4641	ncbi:XP_020947485.1	4634	ENSSSCP00000030683.2	4634	EQ,Nc,Sm,na	LRP1B,low-density lipoprotein receptor-related protein 1B precursor
hum:XP_005253612.1	4589	Susscr4EVm000033t1	4462	ncbi:XP_020927878.1	4594	ENSSSCP00000010429.3	4594	EQ,Sm,Ev,na	DNAH10,dynein heavy chain 10, axonemal isoform X1
hum:XP_005266395.1	4588	Susscr4EVm000029t1	4589	ncbi:XP_020921121.1	4589	ENSSSCP00000032843.1	4589	EQ,Nc,Sm,na	SACS,sacsin isoform X1
hum:XP_011533341.1	4585	Susscr4EVm000029t2	4586	ncbi:XP_020921122.1	4586	ENSSSCP00000036449.1	4586	EQ,Nc,Sm,na	SACS,sacsin isoform X2
hum:XP_016872671.1	4580	Susscr4EVm000028t2	4623	ncbi:NP_001177099.1	4610	ENSSSCP00000007459.3	4610	Ev,Nc,Sm,na	FAT3,protocadherin Fat 3 isoform X4
hum:XP_006716651.1	4579	Susscr4EVm000006t10	4579	ncbi:XP_020946022.1	4591	ENSSSCP00000050354.1	4579	Nc,Ev,Sm,na	PLEC,plectin isoform X4
hum:NP_000436.2	4574	Susscr4EVm000006t10	4574	ncbi:XP_020946030.1	4591	ENSSSCP00000050354.1	4574	Nc,Ev,Sm,na	PLEC,plectin isoform 1c
hum:XP_011539620.1	4574	Susscr4EVm000032t1	4569	ncbi:XP_020951146.1	4609	ENSSSCP00000031125.1	3037	Nc,Ev,Sm,Smfr,Smlo,	HSPG2,basement membrane-specific heparan sulfate proteoglycan core protein isoform X1
hum:XP_011542365.1	4564	Susscr4EVm000025t50	3749	ncbi:XP_020919920.1	4631	ENSSSCP00000019029.3	3804	Nc,Sm,Ev,Smlo,Evlo,	DNAH14,dynein heavy chain 14, axonemal isoform X10
hum:NP_000375.2	4563	Susscr4EVm000030t1	4575	ncbi:XP_020941351.1	4575	ENSSSCP00000042786.1	4575	EQ,Nc,Sm,na	APOB,apolipoprotein B-100 precursor
hum:XP_011542366.1	4561	Susscr4EVm000033t1	3599	ncbi:XP_020919920.1	4631	ENSSSCP00000019029.3	3868	Nc,Sm,Ev,Smlo,Evlo,	DNAH14,dynein heavy chain 14, axonemal isoform X11
hum:XP_016874792.1	4561	Susscr4EVm000031t27	4567	ncbi:XP_020931944.1	4641	ENSSSCP00000030683.2	4561	Nc,Ev,Sm,na	LRP1,prolow-density lipoprotein receptor-related protein 1 isoform X1
hum:XP_005251035.1	4556	Susscr4EVm000006t75	4560	ncbi:XP_020946036.1	4566	ENSSSCP00000049773.1	4554	EQ,Ev,Sm,na	PLEC,plectin isoform X1
hum:XP_005251036.1	4552	Susscr4EVm000006t75	4558	ncbi:XP_020946033.1	4564	ENSSSCP00000059540.1	4555	EQ,Ev,Sm,na	PLEC,plectin isoform X6
hum:XP_005251037.1	4552	Susscr4EVm000006t75	4558	ncbi:XP_020946039.1	4564	ENSSSCP00000059540.1	4555	EQ,Ev,Sm,na	PLEC,plectin isoform X5
hum:XP_005251038.1	4538	Susscr4EVm000006t75	4558	ncbi:XP_020946042.1	4544	ENSSSCP00000059540.1	4555	EQ,Sm,Nc,na	PLEC,plectin isoform X7
hum:XP_024306372.1	4531	Susscr4EVm000035t1	4487	ncbi:XP_020923546.1	4508	ENSSSCP00000019091.3	4487	Nc,Ev,Sm,na	DNAH2,dynein heavy chain 2, axonemal isoform X1
hum:XP_005251039.1	4530	Susscr4EVm000006t75	4558	ncbi:XP_020946022.1	4542	ENSSSCP00000059540.1	4569	Sm,Ev,Nc,na	PLEC,plectin isoform X8
hum:XP_006716652.1	4529	Susscr4EVm000006t75	4558	ncbi:XP_020946046.1	4541	ENSSSCP00000059540.1	4555	EQ,Sm,Nc,na	PLEC,plectin isoform X9
hum:NP_958781.1	4525	Susscr4EVm000006t75	4553	ncbi:XP_020946030.1	4542	ENSSSCP00000059540.1	4569	Sm,Ev,Nc,na	PLEC,plectin isoform 1e
hum:XP_005251041.1	4520	Susscr4EVm000006t75	4558	ncbi:XP_020946050.1	4532	ENSSSCP00000059540.1	4554	EQ,Sm,Nc,na	PLEC,plectin isoform X13
hum:NP_001264044.1	4516	Susscr4EVm000033t1	4522	ncbi:XP_013836770.2	4596	ENSSSCP00000019029.3	4585	Nc,Sm,Ev,na	DNAH11,dynein heavy chain 11, axonemal
hum:XP_011521965.1	4509	Susscr4EVm000035t1	4583	ncbi:XP_020923542.1	4583	ENSSSCP00000019091.3	4583	EQ,Nc,Sm,na	DNAH2,dynein heavy chain 2, axonemal isoform X2
hum:XP_016871599.1	4504	Susscr4EVm000044t1	4028	ncbi:XP_005671069.2	4408	ENSSSCP00000047594.1	2798	Nc,Ev,Sm,Smfr,Smlo,	ANK3,ankyrin-3 isoform X1
hum:XP_016884680.1	4501	Susscr4EVm000037t12	4458	ncbi:XP_005673709.1	4450	ENSSSCP00000013120.3	4450	EQ,Nc,Sm,na	HUWE1,E3 ubiquitin-protein ligase HUWE1 isoform X1
hum:XP_016874449.1	4494	Susscr4EVm000033t1	4388	ncbi:XP_020927881.1	4544	ENSSSCP00000034555.1	4551	EQ,Nc,Ev,na	DNAH10,dynein heavy chain 10, axonemal isoform X5
hum:XP_016884682.1	4494	Susscr4EVm000037t12	4451	ncbi:XP_013841606.1	4450	ENSSSCP00000013120.3	4443	EQ,Nc,Sm,na	HUWE1,E3 ubiquitin-protein ligase HUWE1 isoform X3
hum:NP_001035194.1	4493	Susscr4EVm009200t1	360	ncbi:XP_020943636.1	354	0	0	EQ,Nc,Sm,Smmi,Smlo,	MUC17,mucin-17 precursor
hum:XP_011542372.1	4491	Susscr4EVm000042t1	3690	ncbi:XP_020942964.1	4548	ENSSSCP00000019029.3	3870	Nc,Sm,Ev,Smlo,Evlo,	DNAH14,dynein heavy chain 14, axonemal isoform X16
hum:XP_016884683.1	4486	Susscr4EVm000037t1	4450	ncbi:XP_005673709.1	4450	ENSSSCP00000013120.3	4450	EQ,Nc,Sm,na	HUWE1,E3 ubiquitin-protein ligase HUWE1 isoform X4
hum:XP_011536319.1	4477	Susscr4EVm000035t1	4316	ncbi:XP_020927878.1	4483	ENSSSCP00000010429.3	4483	EQ,Sm,Ev,na	DNAH10,dynein heavy chain 10, axonemal isoform X7
hum:NP_997320.2	4471	Susscr4EVm000033t1	4462	ncbi:XP_020954316.1	4569	ENSSSCP00000034555.1	4564	EQ,Sm,Ev,na	DNAH10,dynein heavy chain 10, axonemal
hum:XP_011523718.1	4466	Susscr4EVm000035t1	4474	ncbi:XP_013836770.2	4565	ENSSSCP00000042715.1	4493	Nc,Sm,Ev,na	DNAH17,dynein heavy chain 17, axonemal isoform X1
hum:XP_016856609.1	4456	Susscr4EVm000032t21	4453	ncbi:XP_020951148.1	4417	ENSSSCP00000031125.1	4360	Ev,Nc,Sm,na	HSPG2,basement membrane-specific heparan sulfate proteoglycan core protein isoform X2
hum:XP_016871605.1	4401	Susscr4EVm000044t3	3974	ncbi:XP_005671069.2	4407	ENSSSCP00000047594.1	2684	Nc,Ev,Sm,Smfr,Smlo,	ANK3,ankyrin-3 isoform X16
hum:XP_016867257.1	4396	Susscr4EVm000096t1	1540	ncbi:XP_020919556.1	2660	ENSSSCP00000056629.1	3880	Sm,Nc,Ev,Nclo,Evfr,Evlo,	ABCA13,ATP-binding cassette sub-family A member 13 isoform X11
hum:NP_056193.2	4388	Susscr4EVm000036t2	4389	ncbi:XP_020951033.1	4389	ENSSSCP00000003729.3	4389	EQ,Nc,Sm,na	VPS13D,vacuolar protein sorting-associated protein 13D isoform 1
hum:XP_016884695.1	4367	Susscr4EVm000037t12	4340	ncbi:XP_013841614.1	4316	ENSSSCP00000040826.1	4316	Ev,Nc,Sm,na	HUWE1,E3 ubiquitin-protein ligase HUWE1 isoform X12
hum:NP_001438.1	4349	Susscr4EVm000028t6	4277	ncbi:XP_020932317.1	4351	ENSSSCP00000018099.3	4351	EQ,Sm,Ev,na	FAT2,protocadherin Fat 2 precursor
hum:XP_024306066.1	4343	Susscr4EVm000040t1	4369	ncbi:XP_013843264.1	4342	ENSSSCP00000008588.2	4341	Ev,Nc,Sm,na	PKD1,polycystin-1 isoform X1
hum:XP_011520830.1	4321	Susscr4EVm000040t1	4284	ncbi:XP_013843265.1	4269	ENSSSCP00000008588.2	4256	Ev,Nc,Sm,na	PKD1,polycystin-1 isoform X2
hum:NP_001073932.1	4314	Susscr4EVm000039t1	4393	ncbi:XP_020918376.1	4314	ENSSSCP00000001722.3	3561	Ev,Nc,Sm,Smlo,	DYNC2H1,cytoplasmic dynein 2 heavy chain 1 isoform 2
hum:XP_016861618.1	4288	Susscr4EVm000042t1	4289	ncbi:XP_020924545.1	4327	ENSSSCP00000025626.2	4331	EQ,Nc,Ev,na	DNAH1,dynein heavy chain 1, axonemal isoform X1
hum:NP_001103132.3	4284	Susscr4EVm000038t1	4284	ncbi:XP_005657379.1	4293	ENSSSCP00000056908.1	4288	EQ,Sm,Ev,na	HECTD4,probable E3 ubiquitin-protein ligase HECTD4
hum:XP_016869458.1	4253	Susscr4EVm000190t1	2618	ncbi:XP_020944671.1	4242	ENSSSCP00000034263.1	4266	Sm,Nc,Ev,Evfr,Evlo,	PKHD1L1,fibrocystin-L isoform X1
hum:NP_061978.6	4242	Susscr4EVm000168t2	2563	ncbi:XP_020953997.1	4311	ENSSSCP00000030534.2	4053	Nc,Sm,Ev,Evfr,Evlo,	TNXB,tenascin-X isoform 1 precursor
hum:XP_016873780.1	4237	Susscr4EVm000041t1	4241	ncbi:XP_020918376.1	4248	ENSSSCP00000001722.3	3256	EQ,Ev,Sm,Smlo,	DYNC2H1,cytoplasmic dynein 2 heavy chain 1 isoform X2
hum:XP_016863556.1	4183	Susscr4EVm000050t1	3990	ncbi:XP_020956362.1	4141	ENSSSCP00000047594.1	3990	Nc,Ev,Sm,na	ANK2,ankyrin-2 isoform X1
hum:NP_055935.4	4169	Susscr4EVm000062t2	3582	ncbi:XP_005662521.1	3687	ENSSSCP00000043254.1	3687	EQ,Sm,Ev,na	ALMS1,Alstrom syndrome protein 1
hum:NP_001361.1	4158	Susscr4EVm000035t1	3745	ncbi:XP_020942964.1	4159	ENSSSCP00000039172.1	3750	Nc,Sm,Ev,na	DNAH6,dynein heavy chain 6, axonemal
hum:XP_016869461.1	4152	Susscr4EVm000046t1	3636	ncbi:XP_020954475.1	3644	ENSSSCP00000001903.3	3636	EQ,Ev,Sm,na	PKHD1L1,fibrocystin-L isoform X5
hum:XP_024303730.1	4137	Susscr4EVm000044t2	3998	ncbi:XP_005671069.2	3967	ENSSSCP00000047594.1	2318	Ev,Nc,Sm,Smfr,Smlo,	ANK3,ankyrin-3 isoform X18
hum:XP_016878921.1	4130	Susscr4EVm000042t1	3608	ncbi:XP_020942162.1	4095	ENSSSCP00000039172.1	4097	EQ,Nc,Ev,Evlo,	DNAH3,dynein heavy chain 3, axonemal isoform X11
hum:NP_008835.5	4128	Susscr4EVm000043t1	4141	ncbi:XP_020945078.1	4141	ENSSSCP00000006687.3	4141	EQ,Nc,Sm,na	PRKDC,DNA-dependent protein kinase catalytic subunit isoform 1
hum:NP_619639.3	4074	Susscr4EVm000046t1	4079	ncbi:XP_020954480.1	4093	ENSSSCP00000039341.1	4088	EQ,Sm,Ev,na	PKHD1,fibrocystin isoform 1 precursor
hum:NP_705838.3	4069	Susscr4EVm000045t2	4143	ncbi:NP_001184236.1	1583	ENSSSCP00000025962.2	3523	Ev,Sm,Nc,Smlo,Ncfr,Nclo,	CMYA5,cardiomyopathy-associated protein 5
hum:NP_002007.1	4061	Susscr4EVm019958t1	102	ncbi:XP_020946480.1	2711	ENSSSCP00000026408.2	1463	Nc,Sm,Ev,Smfr,Smlo,Evmi,Evlo,	FLG,filaggrin
hum:NP_061720.2	4024	Susscr4EVm000042t1	3685	ncbi:XP_020931475.1	4024	ENSSSCP00000043379.1	3985	Nc,Sm,Ev,na	DNAH7,dynein heavy chain 7, axonemal
hum:NP_060360.3	4022	Susscr4EVm000048t1	4022	ncbi:XP_020946261.1	4022	ENSSSCP00000033987.1	4022	EQ,Nc,Sm,na	VPS13B,vacuolar protein sorting-associated protein 13B isoform 5
hum:NP_079350.5	4012	Susscr4EVm000047t2	4023	ncbi:XP_013834268.2	4013	ENSSSCP00000009595.3	4015	EQ,Sm,Nc,na	FRAS1,extracellular matrix protein FRAS1 isoform 1 precursor
hum:XP_016866435.1	4009	Susscr4EVm000046t1	4014	ncbi:XP_020954477.1	4057	ENSSSCP00000035986.1	4052	EQ,Sm,Ev,na	PKHD1,fibrocystin isoform X4
hum:XP_011541131.1	4005	Susscr4EVm000051t2	4007	ncbi:XP_020918570.1	4007	ENSSSCP00000043846.1	4007	EQ,Nc,Sm,na	KMT2A,histone-lysine N-methyltransferase 2A isoform X1
hum:XP_016866436.1	3986	Susscr4EVm000046t1	4001	ncbi:XP_020954478.1	4010	ENSSSCP00000001903.3	4001	EQ,Ev,Sm,na	PKHD1,fibrocystin isoform X5
hum:XP_016867131.1	3968	Susscr4EVm000053t2	3974	ncbi:XP_020957838.1	3973	ENSSSCP00000036592.1	3947	EQ,Nc,Sm,na	AKAP9,A-kinase anchor protein 9 isoform X1
hum:NP_001278590.1	3964	Susscr4EVm000039t1	3792	ncbi:XP_020925466.1	3968	ENSSSCP00000039172.1	3924	Nc,Sm,Ev,na	DNAH12,dynein heavy chain 12, axonemal isoform 3
hum:XP_016867132.1	3955	Susscr4EVm000053t1	3967	ncbi:XP_020957838.1	3973	ENSSSCP00000016237.3	3947	EQ,Ev,Sm,na	AKAP9,A-kinase anchor protein 9 isoform X2
hum:XP_016879273.1	3953	Susscr4EVm000006t108	4054	ncbi:XP_020949328.1	4054	ENSSSCP00000039845.1	4054	EQ,Nc,Sm,na	ZNF469,zinc finger protein 469 isoform X1
hum:XP_016867133.1	3952	Susscr4EVm000053t2	3974	ncbi:XP_020957837.1	3977	ENSSSCP00000036592.1	3957	EQ,Ev,Sm,na	AKAP9,A-kinase anchor protein 9 isoform X3
hum:XP_016867135.1	3939	Susscr4EVm000053t1	3967	ncbi:XP_020957837.1	3977	ENSSSCP00000016237.3	3957	Nc,Ev,Sm,na	AKAP9,A-kinase anchor protein 9 isoform X5
hum:XP_006714379.1	3936	Susscr4EVm000091t1	2733	ncbi:XP_020956264.1	3988	ENSSSCP00000009994.3	2733	Nc,Ev,Sm,Evlo,Smlo,	FRAS1,extracellular matrix protein FRAS1 isoform X1
hum:NP_003449.2	3926	Susscr4EVm000052t1	3865	ncbi:XP_020924420.1	3878	ENSSSCP00000038021.1	3878	EQ,Sm,Ev,na	BSN,protein bassoon
hum:XP_024306377.1	3866	Susscr4EVm000035t1	3776	ncbi:XP_020927884.1	3800	ENSSSCP00000042715.1	3779	Nc,Sm,Ev,na	DNAH2,dynein heavy chain 2, axonemal isoform X7
hum:XP_024306378.1	3863	Susscr4EVm000033t1	3835	ncbi:XP_020923546.1	3847	ENSSSCP00000042715.1	3849	EQ,Nc,Ev,na	DNAH2,dynein heavy chain 2, axonemal isoform X8
hum:XP_011512985.1	3860	Susscr4EVm000046t1	2940	ncbi:XP_020954479.1	3834	ENSSSCP00000034263.1	3357	Nc,Sm,Ev,Smlo,Evlo,	PKHD1,fibrocystin isoform X6
hum:NP_001231509.1	3859	Susscr4EVm000054t1	3873	ncbi:XP_020941755.1	3884	ENSSSCP00000043762.1	3877	EQ,Sm,Ev,na	TRRAP,transformation/transcription domain-associated protein isoform 1
hum:XP_011542333.1	3855	Susscr4EVm000055t1	3867	ncbi:XP_020928810.1	3856	ENSSSCP00000056804.1	3856	Ev,Nc,Sm,na	LYST,lysosomal-trafficking regulator isoform X1
hum:XP_016877966.1	3855	Susscr4EVm000017t4	3976	ncbi:XP_020928342.1	3915	ENSSSCP00000010815.3	3931	Ev,Sm,Nc,na	RYR3,ryanodine receptor 3 isoform X12
hum:NP_001338294.1	3843	Susscr4EVm005161t15	422	ncbi:XP_020937556.1	419	ENSSSCP00000007148.3	358	EQ,Nc,Sm,Smlo,	NBPF19,neuroblastoma breakpoint family member 19
hum:XP_011530957.1	3830	Susscr4EVm000035t1	3745	ncbi:XP_020919920.1	3993	ENSSSCP00000039172.1	3750	Nc,Sm,Ev,na	DNAH6,dynein heavy chain 6, axonemal isoform X6
hum:NP_001289300.1	3795	Susscr4EVm005161t15	422	ncbi:XP_020946353.1	434	ENSSSCP00000007156.3	332	Nc,Ev,Sm,Smlo,	NBPF10,neuroblastoma breakpoint family member 10 isoform a
hum:NP_065872.1	3753	Susscr4EVm000059t1	3761	ncbi:XP_020950021.1	3761	ENSSSCP00000049252.1	3761	EQ,Nc,Sm,na	VPS13C,vacuolar protein sorting-associated protein 13C isoform 2A
hum:XP_011544188.1	3740	Susscr4EVm000042t1	3687	ncbi:XP_020925466.1	3776	ENSSSCP00000043379.1	3768	EQ,Sm,Ev,na	DNAH3,dynein heavy chain 3, axonemal isoform X6
hum:XP_016877788.1	3734	Susscr4EVm000250t1	2303	ncbi:XP_020940552.1	3745	ENSSSCP00000005106.2	3656	Nc,Sm,Ev,Evfr,Evlo,	SPTBN5,spectrin beta chain, non-erythrocytic 5 isoform X1
hum:NP_001158058.1	3708	Susscr4EVm001096t3	1384	ncbi:XP_020920166.1	1566	ENSSSCP00000031173.1	1729	Sm,Nc,Ev,Evlo,	IGFN1,immunoglobulin-like and fibronectin type III domain-containing protein 1
hum:NP_937756.1	3707	Susscr4EVm000340t1	2143	ncbi:XP_020946241.1	3707	ENSSSCP00000032757.1	3630	Nc,Sm,Ev,Evfr,Evlo,	CSMD3,CUB and sushi domain-containing protein 3 isoform 1
hum:NP_008816.3	3703	Susscr4EVm000058t2	3744	ncbi:XP_020944840.1	3830	ENSSSCP00000006580.3	3813	Nc,Sm,Ev,na	ZFHX3,zinc finger homeobox protein 3 isoform A
hum:XP_006724531.1	3703	Susscr4EVm000061t5	3705	ncbi:XP_020935204.1	3704	ENSSSCP00000023001.3	3662	EQ,Nc,Sm,na	DMD,dystrophin isoform X1
hum:XP_006723859.1	3700	Susscr4EVm000057t1	3702	ncbi:XP_020933876.1	3690	ENSSSCP00000042415.1	3701	EQ,Sm,Nc,na	LAMA5,laminin subunit alpha-5 isoform X1
hum:XP_006724532.1	3695	Susscr4EVm000061t5	3694	ncbi:XP_020935213.1	3700	ENSSSCP00000023001.3	3663	EQ,Ev,Sm,na	DMD,dystrophin isoform X2
hum:XP_005255239.1	3689	Susscr4EVm000063t1	3689	ncbi:XP_020942206.1	3689	ENSSSCP00000054415.1	3689	EQ,Nc,Sm,na	SMG1,serine/threonine-protein kinase SMG1 isoform X1
hum:NP_003997.1	3685	Susscr4EVm000061t13	3687	ncbi:XP_020935204.1	3676	ENSSSCP00000023001.3	3663	Ev,Nc,Sm,na	DMD,dystrophin Dp427m isoform
hum:NP_004000.1	3681	Susscr4EVm000061t1	3677	ncbi:NP_001012408.1	3681	ENSSSCP00000023001.3	3670	EQ,Ev,Sm,na	DMD,dystrophin Dp427p1 isoform
hum:NP_000100.2	3677	Susscr4EVm000061t1	3676	ncbi:XP_020935205.1	3676	ENSSSCP00000023001.3	3664	EQ,Nc,Sm,na	DMD,dystrophin Dp427c isoform
hum:NP_055816.2	3664	Susscr4EVm000060t2	3688	ncbi:XP_020951052.1	3688	ENSSSCP00000031666.1	3144	EQ,Nc,Sm,Smlo,	SPEN,msx2-interacting protein
hum:XP_005255240.1	3663	Susscr4EVm000063t1	3659	ncbi:XP_020942208.1	3663	ENSSSCP00000051228.1	3663	EQ,Sm,Ev,na	SMG1,serine/threonine-protein kinase SMG1 isoform X3
hum:XP_024306069.1	3635	Susscr4EVm000040t1	3674	ncbi:NP_001233131.1	3647	ENSSSCP00000008588.2	3647	Ev,Nc,Sm,na	PKD1,polycystin-1 isoform X6
hum:NP_001268885.1	3631	Susscr4EVm000340t1	2169	ncbi:XP_020951518.1	3632	ENSSSCP00000054777.1	3583	Nc,Sm,Ev,Evfr,Evlo,	CSMD2,CUB and sushi domain-containing protein 2 isoform 1
hum:NP_001018098.1	3628	Susscr4EVm000059t1	3633	ncbi:XP_020950029.1	3636	ENSSSCP00000059238.1	3636	EQ,Sm,Ev,na	VPS13C,vacuolar protein sorting-associated protein 13C isoform 2B
hum:NP_001072.2	3623	Susscr4EVm000064t1	3621	ncbi:XP_020920470.1	3621	ENSSSCP00000011764.3	3626	EQ,Ev,Nc,na	CUBN,cubilin precursor
hum:XP_024302842.1	3617	Susscr4EVm000048t5	3644	ncbi:XP_020946261.1	3617	ENSSSCP00000033987.1	3617	Ev,Nc,Sm,na	VPS13B,vacuolar protein sorting-associated protein 13B isoform X6
hum:NP_078997.4	3616	Susscr4EVm000058t1	3714	ncbi:XP_020952747.1	3713	ENSSSCP00000002970.3	3713	EQ,Nc,Sm,na	ZFHX4,zinc finger homeobox protein 4
hum:XP_006724537.1	3593	Susscr4EVm000061t3	3654	ncbi:XP_020935209.1	3658	ENSSSCP00000023001.3	3552	EQ,Ev,Sm,na	DMD,dystrophin isoform X7
hum:XP_016868499.1	3577	Susscr4EVm000340t1	2143	ncbi:XP_020946244.1	3603	ENSSSCP00000032757.1	3628	Sm,Nc,Ev,Evfr,Evlo,	CSMD3,CUB and sushi domain-containing protein 3 isoform X4
hum:NP_699197.3	3571	Susscr4EVm000067t1	3573	ncbi:XP_003122123.2	3573	ENSSSCP00000031779.1	3579	EQ,Ev,Nc,na	SVEP1,sushi, von Willebrand factor type A, EGF and pentraxin domain-containing protein 1 precursor
hum:XP_016855677.1	3567	Susscr4EVm000340t1	2144	ncbi:XP_020931485.1	3547	ENSSSCP00000054777.1	3542	EQ,Sm,Ev,Evfr,Evlo,	CSMD2,CUB and sushi domain-containing protein 2 isoform X2
hum:XP_011542378.1	3566	Susscr4EVm000039t1	3546	ncbi:XP_020942964.1	3624	ENSSSCP00000019029.3	3594	Nc,Sm,Ev,na	DNAH14,dynein heavy chain 14, axonemal isoform X22
hum:NP_004001.1	3562	Susscr4EVm000061t13	3564	ncbi:XP_020935205.1	3563	ENSSSCP00000023001.3	3551	EQ,Nc,Sm,na	DMD,dystrophin Dp427p2 isoform
hum:XP_011521972.1	3551	Susscr4EVm000035t1	3607	ncbi:XP_020923541.1	3609	ENSSSCP00000019091.3	3607	EQ,Ev,Sm,na	DNAH2,dynein heavy chain 2, axonemal isoform X10
hum:NP_689594.4	3549	Susscr4EVm000081t1	3335	ncbi:XP_005671959.1	3335	ENSSSCP00000043657.1	3335	EQ,Nc,Sm,na	XIRP2,xin actin-binding repeat-containing protein 2 isoform 1
hum:NP_055524.3	3546	Susscr4EVm000069t1	3547	ncbi:XP_020943155.1	3559	ENSSSCP00000042991.1	3547	Nc,Ev,Sm,na	USP34,ubiquitin carboxyl-terminal hydrolase 34
hum:XP_005262915.1	3544	Susscr4EVm000068t5	3547	ncbi:XP_020957454.1	3545	ENSSSCP00000009843.3	2867	EQ,Nc,Sm,Smlo,	WDFY3,WD repeat and FYVE domain-containing protein 3 isoform X1
hum:XP_016880204.1	3531	Susscr4EVm000342t1	2061	ncbi:XP_020923655.1	3548	ENSSSCP00000044826.1	3531	Nc,Sm,Ev,Evfr,Evlo,	MYO15A,unconventional myosin-XV isoform X6
hum:NP_060606.3	3477	Susscr4EVm000104t1	2860	ncbi:XP_020920137.1	2860	ENSSSCP00000034626.1	2972	Sm,Ev,Nc,na	ASPM,abnormal spindle-like microcephaly-associated protein isoform 1
hum:XP_011534403.1	3469	Susscr4EVm000074t3	3413	ncbi:XP_020927911.1	3413	ENSSSCP00000054678.1	3409	EQ,Nc,Sm,na	UTRN,utrophin isoform X1
hum:XP_024308654.1	3466	Susscr4EVm000264t1	1681	ncbi:XP_020935527.1	3543	ENSSSCP00000052227.1	3543	EQ,Sm,Ev,Evfr,Evlo,	FSIP2,fibrous sheath-interacting protein 2 isoform X1
hum:NP_005036.2	3460	Susscr4EVm000072t1	3462	ncbi:XP_020919154.1	3460	ENSSSCP00000016357.3	3460	EQ,Nc,Sm,na	RELN,reelin isoform a precursor
hum:XP_005270743.1	3453	Susscr4EVm000066t2	3455	ncbi:XP_020952534.1	3477	ENSSSCP00000041337.1	2898	Nc,Ev,Sm,Smlo,	SZT2,KICSTOR complex protein SZT2 isoform X1
hum:XP_006711681.1	3448	Susscr4EVm001179t1	1350	ncbi:XP_020920166.1	1293	ENSSSCP00000031173.1	1729	Sm,Ev,Nc,Evlo,Nclo,	IGFN1,immunoglobulin-like and fibronectin type III domain-containing protein 1 isoform X4
hum:XP_016877790.1	3442	Susscr4EVm000226t65	2045	ncbi:XP_020940552.1	2956	ENSSSCP00000005106.2	3397	Sm,Nc,Ev,Nclo,Evfr,Evlo,	SPTBN5,spectrin beta chain, non-erythrocytic 5 isoform X3
hum:NP_009055.2	3433	Susscr4EVm000074t2	3435	ncbi:XP_020927920.1	3437	ENSSSCP00000054678.1	3435	EQ,Ev,Sm,na	UTRN,utrophin
hum:XP_011515434.1	3429	Susscr4EVm000006t93	3431	ncbi:XP_020946022.1	2080	ENSSSCP00000049133.1	2927	Ev,Sm,Nc,Smlo,Ncfr,Nclo,	PLEC,plectin isoform X14
hum:XP_005267190.1	3424	Susscr4EVm000074t2	3413	ncbi:XP_020927942.1	3428	ENSSSCP00000054678.1	3413	Nc,Ev,Sm,na	UTRN,utrophin isoform X6
hum:NP_000050.2	3418	Susscr4EVm000073t1	3483	ncbi:XP_020920843.1	3453	ENSSSCP00000052851.1	3441	Ev,Nc,Sm,na	BRCA2,breast cancer type 2 susceptibility protein
hum:NP_004376.2	3396	Susscr4EVm000077t1	3431	ncbi:NP_001193358.1	3431	ENSSSCP00000015031.3	3431	EQ,Nc,Sm,na	VCAN,versican core protein isoform 1 precursor
hum:NP_001345164.1	3371	Susscr4EVm000079t1	3228	ncbi:XP_020957144.1	3375	ENSSSCP00000027872.2	3216	Nc,Ev,Sm,na	DCHS2,protocadherin-23 isoform 3
hum:XP_011527896.1	3363	Susscr4EVm000110t1	3182	ncbi:XP_020938161.1	3205	ENSSSCP00000059129.1	2617	Nc,Ev,Sm,Smlo,	PCNT,pericentrin isoform X1
hum:NP_071407.4	3354	Susscr4EVm000028t1	2966	ncbi:XP_001925718.2	3354	ENSSSCP00000010958.3	3354	EQ,Sm,Ev,Evlo,	CDH23,cadherin-23 isoform 1 precursor
hum:XP_011524280.1	3342	Susscr4EVm000078t1	3309	ncbi:XP_003482090.3	3309	ENSSSCP00000004016.3	3309	EQ,Nc,Sm,na	LAMA3,laminin subunit alpha-3 isoform X1
hum:XP_011509306.1	3338	Susscr4EVm000286t2	2269	ncbi:XP_020930678.1	3338	ENSSSCP00000022146.2	3338	EQ,Sm,Ev,Evlo,	UNC80,protein unc-80 homolog isoform X1
hum:NP_005951.1	3323	Susscr4EVm002515t1	869	ncbi:XP_020943634.1	500	0	0	Ev,Nc,Sm,Ncfr,Nclo,Smmi,Smlo,	MUC3A,mucin-3A precursor
hum:XP_016879418.1	3319	Susscr4EVm010638t1	341	ncbi:XP_020942270.1	1190	ENSSSCP00000008432.2	3246	Sm,Nc,Ev,Ncfr,Nclo,Evfr,Evlo,	LOC400499,putative uncharacterized protein LOC400499 isoform X1
hum:NP_001398.2	3312	Susscr4EVm000108t18	2622	ncbi:XP_020926298.1	3321	ENSSSCP00000012112.3	3321	EQ,Sm,Ev,Evlo,	CELSR3,cadherin EGF LAG seven-pass G-type receptor 3 precursor
hum:XP_011508781.1	3277	Susscr4EVm000076t1	3332	ncbi:XP_020930538.1	3284	ENSSSCP00000036172.1	844	Ev,Nc,Sm,Smfr,Smlo,	SPEG,striated muscle preferentially expressed protein kinase isoform X3
hum:XP_016859376.1	3270	Susscr4EVm000286t2	2269	ncbi:XP_003133678.3	3270	ENSSSCP00000017112.3	3270	EQ,Sm,Ev,Evlo,	UNC80,protein unc-80 homolog isoform X10
hum:NP_001243415.1	3269	Susscr4EVm000075t8	3300	ncbi:XP_020925933.1	3275	ENSSSCP00000012656.3	3275	Ev,Nc,Sm,na	GOLGB1,golgin subfamily B member 1 isoform 1
hum:XP_016869462.1	3259	Susscr4EVm000046t1	3065	ncbi:XP_020944671.1	3245	ENSSSCP00000006436.3	3248	EQ,Nc,Ev,na	PKHD1L1,fibrocystin-L isoform X6
hum:XP_005264059.1	3258	Susscr4EVm000089t1	3279	ncbi:XP_013851334.1	3270	ENSSSCP00000008687.3	3267	EQ,Nc,Sm,na	RANBP2,E3 SUMO-protein ligase RanBP2 isoform X1
hum:NP_002408.3	3256	Susscr4EVm000290t2	1985	ncbi:XP_020929397.1	3291	ENSSSCP00000025708.2	3288	EQ,Sm,Ev,Evfr,Evlo,	MKI67,proliferation marker protein Ki-67 isoform 1
hum:XP_005248402.1	3251	Susscr4EVm000083t1	3324	ncbi:XP_005672479.2	3277	ENSSSCP00000017844.3	3315	EQ,Sm,Nc,na	CPLANE1,protein JBTS17 isoform X1
hum:NP_006653.2	3230	Susscr4EVm000093t1	3246	ncbi:XP_005653063.1	3242	ENSSSCP00000054591.1	3246	EQ,Sm,Nc,na	SRCAP,helicase SRCAP
hum:XP_005247430.1	3228	Susscr4EVm000075t5	3275	ncbi:XP_020925933.1	3275	ENSSSCP00000012656.3	3270	EQ,Nc,Sm,na	GOLGB1,golgin subfamily B member 1 isoform X6
hum:XP_016866340.1	3212	Susscr4EVm000103t1	3214	ncbi:XP_020951728.1	3214	ENSSSCP00000042818.1	3196	EQ,Nc,Sm,na	LAMA2,laminin subunit alpha-2 isoform X4
hum:XP_011544190.1	3211	Susscr4EVm000025t133	3405	ncbi:XP_020919920.1	3613	ENSSSCP00000053326.1	3404	Nc,Ev,Sm,na	DNAH3,dynein heavy chain 3, axonemal isoform X7
hum:XP_005267038.1	3210	Susscr4EVm000085t6	3245	ncbi:XP_020940122.1	3227	ENSSSCP00000042818.1	3196	Ev,Nc,Sm,na	LAMA2,laminin subunit alpha-2 isoform X1
hum:XP_016866714.1	3195	Susscr4EVm000132t4	2231	ncbi:XP_005665935.1	2598	ENSSSCP00000001096.3	2257	Nc,Sm,Ev,Smlo,Evlo,	DST,dystonin isoform X33
hum:XP_011508493.1	3189	Susscr4EVm000094t5	3211	ncbi:XP_020919409.1	3202	ENSSSCP00000016466.3	3202	EQ,Nc,Sm,na	CEP350,centrosome-associated protein 350 isoform X1
hum:NP_001291477.1	3187	Susscr4EVm006696t1	557	ncbi:XP_020935753.1	3196	ENSSSCP00000028896.2	324	Nc,Ev,Sm,Evfr,Evlo,Smfr,Smlo,	CFAP47,cilia- and flagella-associated protein 47 isoform 1
hum:NP_004360.2	3177	Susscr4EVm000082t1	3206	ncbi:XP_020931400.1	2970	ENSSSCP00000050165.1	2230	Ev,Nc,Sm,Smlo,	COL6A3,collagen alpha-3(VI) chain isoform 1 precursor
hum:XP_011542890.1	3176	Susscr4EVm001338t1	1271	ncbi:XP_005671867.2	3222	ENSSSCP00000047140.1	2930	Nc,Sm,Ev,Evfr,Evlo,	TEX15,testis-expressed protein 15 isoform X1
hum:NP_150648.2	3174	Susscr4EVm000090t1	3179	ncbi:XP_020920767.1	3175	ENSSSCP00000005673.3	2585	EQ,Nc,Sm,Smlo,	VPS13A,vacuolar protein sorting-associated protein 13A isoform A
hum:NP_997244.4	3169	Susscr4EVm000091t1	3174	ncbi:XP_020920874.1	3174	ENSSSCP00000009994.3	3174	EQ,Nc,Sm,na	FREM2,FRAS1-related extracellular matrix protein 2 precursor
hum:NP_001278938.1	3165	Susscr4EVm000223t1	1198	ncbi:XP_020940155.1	3174	ENSSSCP00000011618.3	1378	Nc,Sm,Ev,Smfr,Smlo,Evfr,Evlo,	EYS,protein eyes shut homolog isoform 4 precursor
hum:XP_011537371.1	3161	Susscr4EVm000092t1	3176	ncbi:XP_020948389.1	3116	ENSSSCP00000044295.1	3117	Ev,Sm,Nc,na	CFAP54,cilia- and flagella-associated protein 54 isoform X1
hum:XP_005257207.1	3158	Susscr4EVm000088t1	3085	ncbi:XP_020923777.1	2473	ENSSSCP00000052777.1	2735	Ev,Sm,Nc,Smlo,Nclo,	BPTF,nucleosome-remodeling factor subunit BPTF isoform X1
hum:XP_011534330.1	3157	Susscr4EVm000097t1	3164	ncbi:XP_020946897.1	3164	ENSSSCP00000004766.3	3164	EQ,Nc,Sm,na	REV3L,DNA polymerase zeta catalytic subunit isoform X1
hum:XP_016858420.1	3157	Susscr4EVm000094t1	3211	ncbi:XP_020919409.1	3170	ENSSSCP00000016466.3	3170	Ev,Nc,Sm,na	CEP350,centrosome-associated protein 350 isoform X4
hum:NP_002102.4	3144	Susscr4EVm000058t7	3122	ncbi:XP_020956104.1	3079	ENSSSCP00000009271.3	3075	Ev,Nc,Sm,na	HTT,huntingtin
hum:XP_006718902.2	3133	Susscr4EVm000051t1	3055	ncbi:XP_020918574.1	3168	ENSSSCP00000020255.2	3136	Nc,Sm,Ev,na	KMT2A,histone-lysine N-methyltransferase 2A isoform X5
hum:NP_056224.3	3123	Susscr4EVm000099t13	2979	ncbi:XP_005670570.2	2542	ENSSSCP00000020142.2	2505	Ev,Nc,Sm,Nclo,Smlo,	EP400,0
hum:NP_000417.2	3122	Susscr4EVm000085t1	3217	ncbi:XP_020940122.1	3128	ENSSSCP00000036479.1	3099	Ev,Nc,Sm,na	LAMA2,laminin subunit alpha-2 isoform a precursor
hum:XP_024309756.1	3120	Susscr4EVm000114t1	3047	ncbi:XP_020956833.1	3124	ENSSSCP00000009968.3	3040	Nc,Ev,Sm,na	FRYL,protein furry homolog-like isoform X1
hum:XP_011533736.1	3118	Susscr4EVm000095t1	3150	ncbi:XP_013848273.2	3122	ENSSSCP00000004838.3	3063	Ev,Nc,Sm,na	COL12A1,collagen alpha-1(XII) chain isoform X1
hum:XP_005254300.1	3115	Susscr4EVm000100t1	3129	ncbi:XP_020953037.1	3120	ENSSSCP00000005110.3	2663	EQ,Nc,Sm,Smlo,	MGA,MAX gene-associated protein isoform X1
hum:NP_057427.3	3114	Susscr4EVm000102t49	3148	ncbi:XP_003130443.4	3118	ENSSSCP00000016520.3	3118	Ev,Nc,Sm,na	CENPF,centromere protein F
hum:XP_011512129.1	3113	Susscr4EVm000116t1	3074	ncbi:XP_005656553.1	3074	ENSSSCP00000031288.1	3074	EQ,Nc,Sm,na	BOD1L1,biorientation of chromosomes in cell division protein 1-like 1 isoform X1
hum:XP_016865741.1	3106	Susscr4EVm000095t2	3103	ncbi:XP_013848273.2	3103	ENSSSCP00000004838.3	3044	EQ,Nc,Sm,na	COL12A1,collagen alpha-1(XII) chain isoform X2
hum:XP_006717045.1	3104	Susscr4EVm000106t1	3076	ncbi:XP_020920716.1	3105	ENSSSCP00000005669.3	1507	Nc,Ev,Sm,Smfr,Smlo,	PRUNE2,protein prune homolog 2 isoform X1
hum:NP_009049.2	3097	Susscr4EVm000098t1	3132	ncbi:XP_020932800.1	3054	ENSSSCP00000017776.3	3114	Ev,Sm,Nc,na	TRIO,triple functional domain protein
hum:XP_005257212.1	3095	Susscr4EVm000088t10	3097	ncbi:XP_020923777.1	2410	ENSSSCP00000052777.1	2672	Ev,Sm,Nc,Smlo,Nclo,	BPTF,nucleosome-remodeling factor subunit BPTF isoform X7
hum:XP_005271966.1	3086	Susscr4EVm000109t1	3168	ncbi:XP_020951079.1	3168	ENSSSCP00000004991.3	3168	EQ,Nc,Sm,na	DMXL1,dmX-like protein 1 isoform X1
hum:XP_016855788.1	3086	Susscr4EVm000025t50	3072	ncbi:XP_020942964.1	3109	ENSSSCP00000019029.3	3096	Nc,Sm,Ev,na	DNAH14,dynein heavy chain 14, axonemal isoform X23
hum:NP_722576.3	3080	Susscr4EVm001380t1	785	ncbi:XP_020935531.1	1406	ENSSSCP00000050885.1	785	Nc,Ev,Sm,Evfr,Evlo,Smfr,Smlo,	ADGRG4,adhesion G-protein coupled receptor G4
hum:XP_005271967.1	3065	Susscr4EVm000109t1	3164	ncbi:XP_020951082.1	3166	ENSSSCP00000004991.3	3164	EQ,Ev,Sm,na	DMXL1,dmX-like protein 1 isoform X2
hum:NP_004361.3	3063	Susscr4EVm000095t1	3091	ncbi:XP_013848274.2	3066	ENSSSCP00000004838.3	3066	Ev,Nc,Sm,na	COL12A1,collagen alpha-1(XII) chain long isoform precursor
hum:NP_001296171.1	3058	Susscr4EVm000342t1	1744	ncbi:XP_020923730.1	2602	ENSSSCP00000044826.1	2366	Nc,Sm,Ev,Evlo,	MYO15B,myosin XVB
hum:XP_005254312.1	3058	Susscr4EVm000105t3	3168	ncbi:XP_020940323.1	3169	ENSSSCP00000034916.1	3151	EQ,Ev,Sm,na	DMXL2,dmX-like protein 2 isoform X1
hum:NP_000042.3	3056	Susscr4EVm000101t1	3054	ncbi:NP_001116552.1	3058	ENSSSCP00000042060.1	3058	EQ,Sm,Ev,na	ATM,serine-protein kinase ATM isoform a
hum:NP_001167587.1	3037	Susscr4EVm000105t2	3152	ncbi:XP_020940323.1	3168	ENSSSCP00000034916.1	3151	Nc,Ev,Sm,na	DMXL2,dmX-like protein 2 isoform 1
hum:NP_056078.2	3036	Susscr4EVm000105t1	3151	ncbi:XP_020940323.1	3168	ENSSSCP00000034916.1	3150	Nc,Ev,Sm,na	DMXL2,dmX-like protein 2 isoform 2
hum:XP_005248147.1	3028	Susscr4EVm000114t1	3047	ncbi:XP_020920836.1	3043	ENSSSCP00000009968.3	3040	EQ,Nc,Sm,na	FRYL,protein furry homolog-like isoform X6
hum:XP_011515855.1	3027	Susscr4EVm000115t1	3058	ncbi:XP_020944993.1	3058	ENSSSCP00000032519.1	3029	EQ,Nc,Sm,na	CHD7,chromodomain-helicase-DNA-binding protein 7 isoform X1
hum:XP_011533737.1	3027	Susscr4EVm000095t5	2721	ncbi:XP_013848273.2	2409	ENSSSCP00000004838.3	2350	Ev,Nc,Sm,Nclo,Smlo,	COL12A1,collagen alpha-1(XII) chain isoform X3
hum:XP_016864674.1	3023	Susscr4EVm000025t115	3219	ncbi:XP_020919920.1	3219	ENSSSCP00000053326.1	3213	EQ,Nc,Sm,na	DNAH5,dynein heavy chain 5, axonemal isoform X10
hum:XP_005271969.1	3020	Susscr4EVm000109t1	3098	ncbi:XP_020951093.1	3101	ENSSSCP00000042597.1	3101	EQ,Sm,Ev,na	DMXL1,dmX-like protein 1 isoform X3
hum:XP_006719812.1	3019	Susscr4EVm000113t1	3061	ncbi:XP_020956833.1	3061	ENSSSCP00000043071.1	3061	EQ,Nc,Sm,na	FRY,protein furry homolog isoform X1
hum:XP_006724446.1	3019	Susscr4EVm000139t1	2873	ncbi:XP_020945744.1	2813	ENSSSCP00000036210.1	2900	Sm,Ev,Nc,na	CELSR1,cadherin EGF LAG seven-pass G-type receptor 1 isoform X1
hum:XP_005257216.1	3015	Susscr4EVm000088t11	3145	ncbi:XP_020923777.1	3028	ENSSSCP00000056719.1	2592	Ev,Nc,Sm,Smlo,	BPTF,nucleosome-remodeling factor subunit BPTF isoform X15
hum:XP_016864716.1	3015	Susscr4EVm000028t1	3009	ncbi:XP_020932317.1	3015	ENSSSCP00000036339.1	3068	Sm,Nc,Ev,na	FAT2,protocadherin Fat 2 isoform X2
hum:NP_055845.1	3013	Susscr4EVm000114t1	3032	ncbi:XP_020956843.1	3033	ENSSSCP00000043071.1	3030	EQ,Ev,Sm,na	FRYL,protein furry homolog-like
hum:NP_075463.2	3013	Susscr4EVm000113t1	3052	ncbi:XP_020956843.1	3109	ENSSSCP00000043071.1	3054	Nc,Sm,Ev,na	FRY,protein furry homolog
hum:XP_024303524.1	3011	Susscr4EVm000117t6	3063	ncbi:NP_001245281.1	1061	ENSSSCP00000058060.1	1888	Ev,Sm,Nc,Smfr,Smlo,Ncfr,Nclo,	TACC2,transforming acidic coiled-coil-containing protein 2 isoform X1
hum:XP_006712316.1	3010	Susscr4EVm000082t2	3061	ncbi:XP_020931400.1	3073	ENSSSCP00000027868.2	2608	Nc,Ev,Sm,Smlo,	COL6A3,collagen alpha-3(VI) chain isoform X2
hum:XP_011519699.1	3005	Susscr4EVm000100t3	3071	ncbi:XP_020953037.1	3071	ENSSSCP00000005110.3	2614	EQ,Nc,Sm,Smlo,	MGA,MAX gene-associated protein isoform X4
hum:XP_011509793.1	3004	Susscr4EVm000065t1	2652	ncbi:XP_020931475.1	2986	ENSSSCP00000043379.1	2947	Nc,Sm,Ev,Evlo,	DNAH7,dynein heavy chain 7, axonemal isoform X5
hum:XP_016879426.1	3003	Susscr4EVm031737t1	178	ncbi:XP_020942270.1	1190	ENSSSCP00000008432.2	2977	Sm,Nc,Ev,Ncfr,Nclo,Evmi,Evlo,	LOC400499,putative uncharacterized protein LOC400499 isoform X9
hum:XP_016863060.1	2993	Susscr4EVm000122t1	2974	ncbi:XP_020927314.1	2988	ENSSSCP00000011987.3	2931	Nc,Ev,Sm,na	TRANK1,TPR and ankyrin repeat-containing protein 1 isoform X3
hum:XP_006713873.1	2988	Susscr4EVm000126t1	3005	ncbi:XP_020926913.1	2965	ENSSSCP00000017776.3	2946	Ev,Nc,Sm,na	KALRN,kalirin isoform X1
hum:XP_016868217.1	2979	Susscr4EVm000118t5	3036	ncbi:XP_020941700.1	3019	ENSSSCP00000035332.1	2469	Ev,Nc,Sm,Smlo,	TNRC18,trinucleotide repeat-containing gene 18 protein isoform X1
hum:NP_705833.3	2970	Susscr4EVm000125t1	2987	ncbi:XP_020926350.1	2987	ENSSSCP00000027941.2	2987	EQ,Nc,Sm,na	CRYBG3,very large A-kinase anchor protein
hum:XP_005269449.1	2969	Susscr4EVm000117t1	3047	ncbi:NP_001245281.1	1049	ENSSSCP00000058060.1	1888	Ev,Sm,Nc,Smfr,Smlo,Ncfr,Nclo,	TACC2,transforming acidic coiled-coil-containing protein 2 isoform X7
hum:XP_005266404.2	2967	Susscr4EVm000124t1	2967	ncbi:XP_020920850.1	2980	ENSSSCP00000056287.1	2967	Nc,Ev,Sm,na	NBEA,neurobeachin isoform X1
hum:XP_016879871.1	2966	Susscr4EVm000121t1	2960	ncbi:XP_020923358.1	2945	ENSSSCP00000049943.1	2835	Ev,Nc,Sm,na	ZZEF1,zinc finger ZZ-type and EF-hand domain-containing protein 1 isoform X1
hum:NP_060959.2	2964	Susscr4EVm000120t1	2991	ncbi:XP_013852455.2	2964	ENSSSCP00000006936.3	2964	Ev,Nc,Sm,na	ASH1L,histone-lysine N-methyltransferase ASH1L
hum:XP_005257217.1	2961	Susscr4EVm000088t3	3145	ncbi:XP_020923777.1	2974	ENSSSCP00000056719.1	2538	Ev,Nc,Sm,Smlo,	BPTF,nucleosome-remodeling factor subunit BPTF isoform X18
hum:XP_005257218.1	2957	Susscr4EVm000088t4	3173	ncbi:XP_020923777.1	2970	ENSSSCP00000056719.1	2592	Ev,Nc,Sm,Smlo,	BPTF,nucleosome-remodeling factor subunit BPTF isoform X19
hum:NP_000085.1	2944	Susscr4EVm000112t2	2945	ncbi:XP_005669576.1	2945	ENSSSCP00000036044.1	2945	EQ,Nc,Sm,na	COL7A1,collagen alpha-1(VII) chain precursor
hum:XP_016868220.1	2936	Susscr4EVm000118t4	3021	ncbi:XP_020941700.1	3019	ENSSSCP00000035332.1	2469	EQ,Nc,Sm,Smlo,	TNRC18,trinucleotide repeat-containing gene 18 protein isoform X3
hum:NP_001264198.1	2925	Susscr4EVm000145t5	1710	ncbi:XP_020938932.1	2939	ENSSSCP00000024487.2	2874	Nc,Sm,Ev,Evfr,Evlo,	OTOG,otogelin isoform a precursor
hum:XP_024303530.1	2924	Susscr4EVm000117t3	3017	ncbi:NP_001245281.1	1046	ENSSSCP00000058060.1	1888	Ev,Sm,Nc,Smfr,Smlo,Ncfr,Nclo,	TACC2,transforming acidic coiled-coil-containing protein 2 isoform X15
hum:NP_001399.1	2923	Susscr4EVm000108t10	2915	ncbi:XP_020945744.1	2894	ENSSSCP00000042291.1	2923	EQ,Ev,Nc,na	CELSR2,cadherin EGF LAG seven-pass G-type receptor 2 precursor
hum:XP_016867287.1	2920	Susscr4EVm000988t2	1100	ncbi:XP_020952656.1	1100	ENSSSCP00000040754.1	942	EQ,Nc,Sm,Smlo,	PKD1L1,polycystic kidney disease protein 1-like 1 isoform X1
hum:NP_001278992.1	2913	Susscr4EVm000145t3	1710	ncbi:XP_020938932.1	2927	ENSSSCP00000024487.2	2868	Nc,Sm,Ev,Evfr,Evlo,	OTOG,otogelin isoform b precursor
hum:NP_001278017.1	2912	0	0	ncbi:XP_020949987.1	2283	ENSSSCP00000035987.1	359	Nc,Sm,Ev,Smfr,Smlo,Evmi,Evlo,	WDR87,WD repeat-containing protein 87 isoform 1
hum:NP_001990.2	2912	Susscr4EVm000123t4	2964	ncbi:XP_020940379.1	2912	ENSSSCP00000005017.3	2885	Ev,Nc,Sm,na	FBN2,fibrillin-2 precursor
hum:XP_005254310.1	2906	Susscr4EVm000100t10	2950	ncbi:XP_020953037.1	2916	ENSSSCP00000005110.3	2459	Ev,Nc,Sm,Smlo,	MGA,MAX gene-associated protein isoform X7
hum:XP_016868224.1	2905	Susscr4EVm000118t13	2964	ncbi:XP_020941700.1	2945	ENSSSCP00000035332.1	2469	Ev,Nc,Sm,Smlo,	TNRC18,trinucleotide repeat-containing gene 18 protein isoform X7
hum:XP_005245072.1	2903	Susscr4EVm000129t1	2935	ncbi:XP_005653792.1	2935	ENSSSCP00000051532.1	2920	EQ,Nc,Sm,na	PRRC2C,protein PRRC2C isoform X1
hum:XP_005245073.1	2901	Susscr4EVm000129t1	2935	ncbi:XP_005653796.1	2935	ENSSSCP00000051532.1	2935	EQ,Nc,Sm,na	PRRC2C,protein PRRC2C isoform X2
hum:XP_005256225.1	2898	Susscr4EVm000128t1	2918	ncbi:XP_020949833.1	2881	ENSSSCP00000006643.2	2525	Ev,Nc,Sm,Smlo,	CHD9,chromodomain-helicase-DNA-binding protein 9 isoform X1
hum:XP_016856249.1	2896	Susscr4EVm000129t1	2935	ncbi:XP_013833207.1	2928	ENSSSCP00000051532.1	2920	EQ,Nc,Sm,na	PRRC2C,protein PRRC2C isoform X6
hum:XP_011542339.1	2876	Susscr4EVm000055t4	2854	ncbi:XP_020928810.1	2841	ENSSSCP00000041721.1	2841	Ev,Nc,Sm,na	LYST,lysosomal-trafficking regulator isoform X6
hum:XP_005248326.1	2873	Susscr4EVm000140t6	2962	ncbi:XP_020932749.1	2917	ENSSSCP00000017807.3	2730	Ev,Nc,Sm,na	PDZD2,PDZ domain-containing protein 2 isoform X1
hum:NP_000129.3	2871	Susscr4EVm000141t1	2898	ncbi:XP_013850150.2	2895	ENSSSCP00000023772.2	2895	EQ,Nc,Sm,na	FBN1,fibrillin-1 preproprotein
hum:NP_004406.2	2871	Susscr4EVm000132t1	2885	ncbi:XP_003128216.2	2883	ENSSSCP00000001096.3	2883	EQ,Nc,Sm,na	DSP,desmoplakin isoform I
hum:XP_005245076.1	2869	Susscr4EVm000129t1	2935	ncbi:XP_005653790.1	2935	ENSSSCP00000051532.1	2913	EQ,Nc,Sm,na	PRRC2C,protein PRRC2C isoform X7
hum:XP_005263429.1	2868	Susscr4EVm000124t3	2993	ncbi:XP_020920850.1	3006	ENSSSCP00000056287.1	2990	Nc,Ev,Sm,na	LRBA,lipopolysaccharide-responsive and beige-like anchor protein isoform X1
hum:NP_001341825.1	2861	Susscr4EVm000136t4	2887	ncbi:NP_001193359.1	2865	ENSSSCP00000037498.1	2865	Ev,Nc,Sm,na	APC,adenomatous polyposis coli protein isoform c
hum:XP_016876035.1	2860	Susscr4EVm000124t4	2866	ncbi:XP_020920850.1	2873	ENSSSCP00000056287.1	2860	EQ,Ev,Sm,na	NBEA,neurobeachin isoform X8
hum:XP_016864188.1	2859	Susscr4EVm000015t11	2856	ncbi:XP_020957280.1	2856	ENSSSCP00000047271.1	2856	EQ,Nc,Sm,na	KIAA1109,uncharacterized protein KIAA1109 isoform X16
hum:XP_005245077.1	2858	Susscr4EVm000129t1	2876	ncbi:XP_005653797.1	2890	ENSSSCP00000051532.1	2876	Nc,Ev,Sm,na	PRRC2C,protein PRRC2C isoform X8
hum:NP_001277251.1	2854	Susscr4EVm000109t1	2958	ncbi:XP_020951121.1	2959	ENSSSCP00000038317.1	2959	EQ,Sm,Ev,na	DMXL1,dmX-like protein 1 isoform 3
hum:XP_016882868.1	2851	Susscr4EVm000123t3	2889	ncbi:NP_001001771.1	2881	ENSSSCP00000005017.3	2881	EQ,Nc,Sm,na	FBN3,fibrillin-3 isoform X8
hum:NP_001009931.1	2850	Susscr4EVm011706t1	355	ncbi:XP_020946480.1	970	ENSSSCP00000026408.2	173	Nc,Ev,Sm,Evfr,Evlo,Smfr,Smlo,	HRNR,hornerin
hum:NP_612152.1	2849	Susscr4EVm000988t1	1109	ncbi:XP_020952656.1	1100	ENSSSCP00000040754.1	942	EQ,Nc,Sm,Smlo,	PKD1L1,polycystic kidney disease protein 1-like 1
hum:NP_001258867.1	2845	Susscr4EVm000147t1	2850	ncbi:XP_005655931.1	2828	ENSSSCP00000003272.2	2828	Ev,Nc,Sm,na	MEGF8,multiple epidermal growth factor-like domains protein 8 isoform 1 precursor
hum:NP_001035957.1	2839	Susscr4EVm000131t2	2863	ncbi:XP_020923119.1	2841	ENSSSCP00000018804.3	2841	Ev,Nc,Sm,na	NF1,neurofibromin isoform 1
hum:XP_016867495.1	2838	Susscr4EVm000218t2	1290	ncbi:XP_020919143.1	1618	ENSSSCP00000025624.2	1500	Nc,Sm,Ev,Evlo,	PCLO,protein piccolo isoform X1
hum:NP_056234.2	2828	Susscr4EVm000135t2	2838	ncbi:XP_013846505.2	2838	ENSSSCP00000013642.3	2838	EQ,Nc,Sm,na	MXRA5,matrix-remodeling-associated protein 5 precursor
hum:XP_005245080.1	2824	Susscr4EVm000129t18	2868	ncbi:XP_005653789.1	2857	ENSSSCP00000049373.1	2856	Ev,Nc,Sm,na	PRRC2C,protein PRRC2C isoform X10
hum:XP_016861351.1	2824	Susscr4EVm000025t10	2995	ncbi:XP_020937243.1	2995	ENSSSCP00000053326.1	2995	EQ,Nc,Sm,na	DNAH12,dynein heavy chain 12, axonemal isoform X8
hum:XP_016878740.1	2820	Susscr4EVm000058t2	2834	ncbi:XP_020944836.1	2981	ENSSSCP00000006580.3	2962	Nc,Sm,Ev,na	ZFHX3,zinc finger homeobox protein 3 isoform X2
hum:NP_056198.2	2819	Susscr4EVm005161t15	419	ncbi:XP_020946351.1	437	ENSSSCP00000007148.3	355	Nc,Ev,Sm,Smlo,	NBPF14,neuroblastoma breakpoint family member 14
hum:XP_005245081.1	2819	Susscr4EVm000129t12	2867	ncbi:XP_005653792.1	2857	ENSSSCP00000049373.1	2851	Ev,Nc,Sm,na	PRRC2C,protein PRRC2C isoform X11
hum:NP_006729.4	2817	Susscr4EVm000143t1	2887	ncbi:XP_020955571.1	2844	ENSSSCP00000002454.3	1433	Ev,Nc,Sm,Smfr,Smlo,	AKAP13,A-kinase anchor protein 13 isoform 1
hum:NP_055987.2	2817	Susscr4EVm000129t12	2867	ncbi:XP_005653789.1	2857	ENSSSCP00000049373.1	2851	Ev,Nc,Sm,na	PRRC2C,protein PRRC2C
hum:NP_003377.2	2812	Susscr4EVm000352t1	1747	ncbi:NP_999548.1	2322	ENSSSCP00000008195.3	2322	EQ,Sm,Ev,Evlo,	ZAN,zonadhesin isoform 3 precursor
hum:NP_597677.2	2804	Susscr4EVm000146t2	2804	ncbi:XP_013840191.2	2804	ENSSSCP00000039147.1	2804	EQ,Nc,Sm,na	NIPBL,nipped-B-like protein isoform A
hum:NP_002364.5	2803	Susscr4EVm000111t1	2818	ncbi:XP_005659735.3	2818	ENSSSCP00000005070.3	2818	EQ,Nc,Sm,na	MAP1A,microtubule-associated protein 1A
hum:XP_011542383.1	2803	Susscr4EVm000042t1	2777	ncbi:XP_020942967.1	2828	ENSSSCP00000019029.3	2814	Nc,Sm,Ev,na	DNAH14,dynein heavy chain 14, axonemal isoform X25
hum:NP_056986.2	2799	Susscr4EVm000149t2	2801	ncbi:XP_020944689.1	2801	ENSSSCP00000038277.1	2799	EQ,Nc,Sm,na	UBR5,E3 ubiquitin-protein ligase UBR5 isoform 1
hum:XP_011524025.1	2796	Susscr4EVm000196t3	2882	ncbi:XP_020949315.1	2860	ENSSSCP00000052253.1	2528	Ev,Nc,Sm,Smlo,	PIEZO2,piezo-type mechanosensitive ion channel component 2 isoform X1
hum:XP_011519299.1	2795	Susscr4EVm000239t11	2380	ncbi:XP_013853338.2	2644	ENSSSCP00000041087.1	2531	Nc,Sm,Ev,na	WNK1,serine/threonine-protein kinase WNK1 isoform X1
hum:XP_016873014.1	2794	Susscr4EVm000142t17	2865	ncbi:XP_005667228.2	2865	ENSSSCP00000015815.3	2664	EQ,Nc,Sm,na	TENM4,teneurin-4 isoform X1
hum:XP_011515406.2	2786	Susscr4EVm000149t1	2801	ncbi:XP_020944689.1	2801	ENSSSCP00000038277.1	2801	EQ,Nc,Sm,na	UBR5,E3 ubiquitin-protein ligase UBR5 isoform X1
hum:NP_055318.2	2785	Susscr4EVm000144t1	2796	ncbi:XP_005664260.1	2796	ENSSSCP00000000929.2	2796	EQ,Nc,Sm,na	UTP20,small subunit processome component 20 homolog
hum:XP_016861499.1	2782	Susscr4EVm000157t1	2803	ncbi:XP_020930765.1	2831	ENSSSCP00000055237.1	2831	EQ,Sm,Ev,na	NBEAL2,neurobeachin-like protein 2 isoform X1
hum:XP_005245082.1	2779	Susscr4EVm000129t56	2816	ncbi:XP_005653797.1	2812	ENSSSCP00000049373.1	2797	EQ,Nc,Sm,na	PRRC2C,protein PRRC2C isoform X13
hum:NP_001401.2	2778	Susscr4EVm000147t3	2859	ncbi:XP_005655932.1	2851	ENSSSCP00000003272.2	2828	EQ,Nc,Sm,na	MEGF8,multiple epidermal growth factor-like domains protein 8 isoform 2 precursor
hum:XP_016865149.1	2774	Susscr4EVm000142t1	2860	ncbi:XP_005667228.2	2860	ENSSSCP00000015815.3	2630	EQ,Nc,Sm,na	TENM2,teneurin-2 isoform X1
hum:XP_024308452.1	2770	Susscr4EVm000082t6	2813	ncbi:XP_020931400.1	2798	ENSSSCP00000058388.1	2069	Ev,Nc,Sm,Smlo,	COL6A3,collagen alpha-3(VI) chain isoform X4
hum:XP_011537058.1	2769	Susscr4EVm000215t2	2529	ncbi:XP_020948436.1	2484	ENSSSCP00000036756.1	2276	Ev,Nc,Sm,Smlo,	CEP290,centrosomal protein of 290 kDa isoform X1
hum:NP_003226.4	2768	Susscr4EVm009034t1	453	ncbi:XP_020944233.1	2772	ENSSSCP00000006358.3	1695	Nc,Sm,Ev,Smfr,Smlo,Evfr,Evlo,	TG,thyroglobulin precursor
hum:XP_011531983.1	2759	Susscr4EVm000165t1	2793	ncbi:XP_003128393.1	2793	ENSSSCP00000001647.3	2793	EQ,Nc,Sm,na	ITPR1,inositol 1,4,5-trisphosphate receptor type 1 isoform X1
hum:NP_055990.1	2754	Susscr4EVm000157t1	2805	ncbi:XP_020924308.1	2856	ENSSSCP00000055237.1	2834	Nc,Sm,Ev,na	NBEAL2,neurobeachin-like protein 2
hum:XP_006716231.1	2753	Susscr4EVm000356t2	1878	ncbi:XP_020925407.1	1860	ENSSSCP00000012506.3	1860	Ev,Nc,Sm,na	MGAM,maltase-glucoamylase, intestinal isoform X1
hum:NP_001341831.1	2752	Susscr4EVm000136t5	2724	ncbi:NP_001193359.1	2440	ENSSSCP00000037698.1	2617	Ev,Sm,Nc,Nclo,	APC,adenomatous polyposis coli protein isoform i
hum:NP_057417.3	2752	Susscr4EVm000154t15	2597	ncbi:NP_001231474.1	1882	ENSSSCP00000021891.1	1882	Ev,Nc,Sm,Nclo,Smlo,	SRRM2,serine/arginine repetitive matrix protein 2
hum:XP_011535320.1	2752	Susscr4EVm000169t1	2699	ncbi:XP_020955291.1	2734	0	0	Nc,Ev,Sm,Smmi,Smlo,	UNC79,protein unc-79 homolog isoform X1
hum:NP_001341832.1	2742	Susscr4EVm000136t1	2770	ncbi:NP_001193359.1	2440	ENSSSCP00000036895.1	2607	Ev,Sm,Nc,Nclo,	APC,adenomatous polyposis coli protein isoform j
hum:XP_006712761.1	2736	Susscr4EVm000134t13	2838	ncbi:XP_020924337.1	2892	ENSSSCP00000034838.1	2838	Nc,Ev,Sm,na	NBEAL1,neurobeachin-like protein 1 isoform X1
hum:XP_011524028.1	2735	Susscr4EVm000162t1	2796	ncbi:XP_020951708.1	2796	ENSSSCP00000058415.1	2457	EQ,Nc,Sm,Smlo,	PIEZO2,piezo-type mechanosensitive ion channel component 2 isoform X5
hum:XP_011512848.1	2727	Susscr4EVm000164t1	2649	ncbi:XP_005652684.1	2648	ENSSSCP00000042253.1	2648	EQ,Nc,Sm,na	HIVEP1,zinc finger protein 40 isoform X1
hum:NP_001449.3	2725	Susscr4EVm000161t3	2763	ncbi:XP_020934608.1	2778	ENSSSCP00000040231.1	2747	Nc,Ev,Sm,na	FLNC,filamin-C isoform a
hum:NP_055836.1	2723	Susscr4EVm000158t2	2726	ncbi:XP_003121328.1	2726	ENSSSCP00000052491.1	2726	EQ,Nc,Sm,na	ZNF292,zinc finger protein 292 isoform 1
hum:XP_016874755.1	2721	Susscr4EVm000165t1	2763	ncbi:XP_020924935.1	2788	ENSSSCP00000046736.1	2787	EQ,Sm,Ev,na	ITPR2,inositol 1,4,5-trisphosphate receptor type 2 isoform X1
hum:XP_005245084.1	2719	Susscr4EVm000129t18	2705	ncbi:XP_003130351.3	2693	ENSSSCP00000051532.1	2693	Ev,Nc,Sm,na	PRRC2C,protein PRRC2C isoform X15
hum:XP_011517817.1	2716	Susscr4EVm000195t2	2668	ncbi:XP_020920700.1	2736	ENSSSCP00000049105.1	2715	Nc,Sm,Ev,na	FAM208B,protein FAM208B isoform X1
hum:XP_016883588.1	2716	Susscr4EVm000163t1	2718	ncbi:XP_020933527.1	2732	ENSSSCP00000007838.3	2712	Nc,Ev,Sm,na	CHD6,chromodomain-helicase-DNA-binding protein 6 isoform X1
hum:NP_001186978.2	2715	Susscr4EVm000275t1	2344	ncbi:XP_020929559.1	2670	ENSSSCP00000011480.3	2236	Nc,Ev,Sm,Evlo,Smlo,	CFAP46,cilia- and flagella-associated protein 46
hum:NP_055542.1	2715	Susscr4EVm000152t10	2345	ncbi:XP_003127115.3	2260	ENSSSCP00000054826.1	1595	Ev,Nc,Sm,Smlo,	KMT2B,histone-lysine N-methyltransferase 2B
hum:XP_005246844.1	2707	Susscr4EVm000134t13	2836	ncbi:XP_020924308.1	2890	ENSSSCP00000034838.1	2836	Nc,Ev,Sm,na	NBEAL1,neurobeachin-like protein 1 isoform X3
hum:XP_011535323.1	2707	Susscr4EVm000169t1	2707	ncbi:XP_020955293.1	2707	0	0	EQ,Nc,Sm,Smmi,Smlo,	UNC79,protein unc-79 homolog isoform X5
hum:NP_001338457.1	2706	Susscr4EVm000177t1	2722	ncbi:XP_013842495.1	2731	ENSSSCP00000058630.1	2722	EQ,Ev,Sm,na	SETX,probable helicase senataxin isoform 2
hum:XP_016865151.1	2704	Susscr4EVm000151t1	2799	ncbi:XP_020932371.1	2799	ENSSSCP00000015815.3	2617	EQ,Nc,Sm,na	TENM2,teneurin-2 isoform X5
hum:NP_001804.2	2701	Susscr4EVm000159t5	2814	ncbi:XP_020956373.1	2814	ENSSSCP00000052298.1	2813	EQ,Nc,Sm,na	CENPE,centromere-associated protein E isoform 1 precursor
hum:XP_016880615.1	2700	Susscr4EVm000721t1	1637	ncbi:XP_020923730.1	2311	ENSSSCP00000044826.1	2153	Nc,Sm,Ev,Evlo,	MYO15B,myosin XVB isoform X7
hum:XP_005248337.1	2698	Susscr4EVm000146t3	2698	ncbi:XP_020932251.1	2698	ENSSSCP00000055146.1	2698	EQ,Nc,Sm,na	NIPBL,nipped-B-like protein isoform X3
hum:NP_071900.2	2696	Susscr4EVm000170t1	2703	ncbi:XP_003123715.5	2703	ENSSSCP00000040769.1	2703	EQ,Nc,Sm,na	NSD1,histone-lysine N-methyltransferase, H3 lysine-36 and H4 lysine-20 specific isoform b
hum:XP_011511010.1	2695	Susscr4EVm000193t1	2630	ncbi:XP_020925261.1	2631	ENSSSCP00000038348.1	2631	EQ,Sm,Ev,na	IGSF10,immunoglobulin superfamily member 10 isoform X1
hum:XP_016869285.1	2695	Susscr4EVm004355t9	561	ncbi:NP_001161890.1	2611	ENSSSCP00000006358.3	2616	EQ,Nc,Ev,Evfr,Evlo,	TG,thyroglobulin isoform X6
hum:XP_024301812.1	2695	Susscr4EVm000207t1	2699	ncbi:XP_020932407.1	2699	ENSSSCP00000050900.1	2698	EQ,Nc,Sm,na	MAST4,microtubule-associated serine/threonine-protein kinase 4 isoform X1
hum:XP_011509312.1	2691	Susscr4EVm000286t1	1824	ncbi:XP_020930678.1	2683	ENSSSCP00000022146.2	2683	EQ,Sm,Ev,Evlo,	UNC80,protein unc-80 homolog isoform X15
hum:XP_016883033.1	2685	Susscr4EVm000152t1	2312	ncbi:XP_003127115.3	2260	ENSSSCP00000054826.1	1595	Ev,Nc,Sm,Smlo,	KMT2B,histone-lysine N-methyltransferase 2B isoform X1
hum:XP_024307774.1	2677	Susscr4EVm000437t2	967	ncbi:XP_003127524.2	2685	ENSSSCP00000003585.3	2627	Nc,Sm,Ev,Evfr,Evlo,	HELZ2,helicase with zinc finger domain 2 isoform X1
hum:NP_002215.2	2671	Susscr4EVm000165t3	2745	ncbi:XP_020924935.1	2786	ENSSSCP00000046736.1	2785	EQ,Sm,Ev,na	ITPR3,inositol 1,4,5-trisphosphate receptor type 3
hum:NP_006827.1	2671	Susscr4EVm000172t1	2671	ncbi:XP_020928793.1	2671	ENSSSCP00000050596.1	2671	EQ,Nc,Sm,na	GCN1,eIF-2-alpha kinase activator GCN1
hum:XP_011517820.1	2665	Susscr4EVm000195t2	2669	ncbi:XP_020920701.1	2665	ENSSSCP00000049105.1	2664	EQ,Nc,Sm,na	FAM208B,protein FAM208B isoform X5
hum:NP_001243111.1	2663	Susscr4EVm000184t1	2721	ncbi:XP_020952695.1	2697	ENSSSCP00000034051.1	2621	Ev,Nc,Sm,na	ANKRD11,ankyrin repeat domain-containing protein 11
hum:XP_016884941.1	2657	0	0	ncbi:XP_020935753.1	2668	ENSSSCP00000028896.2	324	Nc,Sm,Ev,Smfr,Smlo,Evmi,Evlo,	CFAP47,cilia- and flagella-associated protein 47 isoform X1
hum:XP_011511226.1	2646	Susscr4EVm000180t1	2656	ncbi:XP_020925230.1	2653	ENSSSCP00000012449.3	2650	EQ,Nc,Sm,na	ATR,serine/threonine-protein kinase ATR isoform X1
hum:XP_011541349.1	2645	Susscr4EVm000173t11	2631	ncbi:XP_020918298.1	2624	ENSSSCP00000015867.3	2542	EQ,Nc,Sm,na	CEP295,centrosomal protein of 295 kDa isoform X1
hum:NP_001171914.1	2642	Susscr4EVm000239t19	2218	ncbi:XP_013853338.2	2643	ENSSSCP00000037720.1	1914	Nc,Ev,Sm,Evlo,Smlo,	WNK1,serine/threonine-protein kinase WNK1 isoform 4
hum:XP_016856320.1	2640	Susscr4EVm000176t113	2778	ncbi:XP_020935806.1	2755	ENSSSCP00000041675.1	2744	Ev,Nc,Sm,na	USP24,ubiquitin carboxyl-terminal hydrolase 24 isoform X1
hum:NP_001278253.1	2639	Susscr4EVm000133t1	2691	ncbi:XP_013845294.2	2689	ENSSSCP00000019433.2	2671	EQ,Nc,Sm,na	BAHCC1,BAH and coiled-coil domain-containing protein 1
hum:XP_011519915.1	2638	Susscr4EVm000187t1	2650	ncbi:XP_020956536.1	2651	ENSSSCP00000038105.1	2650	EQ,Ev,Sm,na	MYO9A,unconventional myosin-IXa isoform X1
hum:NP_998820.3	2634	Susscr4EVm000239t22	2142	ncbi:XP_013853338.2	2129	ENSSSCP00000041087.1	1864	Ev,Nc,Sm,Smlo,	WNK1,serine/threonine-protein kinase WNK1 isoform 3
hum:XP_011521356.1	2629	Susscr4EVm000184t42	2662	ncbi:XP_020952699.1	2663	ENSSSCP00000034051.1	2662	EQ,Ev,Sm,na	ANKRD11,ankyrin repeat domain-containing protein 11 isoform X2
hum:NP_009041.2	2627	Susscr4EVm000178t1	2669	ncbi:XP_005656370.2	2669	ENSSSCP00000002341.3	2639	EQ,Nc,Sm,na	TEP1,telomerase protein component 1 isoform 1
hum:NP_060899.2	2624	Susscr4EVm000228t2	1903	ncbi:XP_005672583.2	1904	ENSSSCP00000017977.3	1904	EQ,Sm,Ev,na	BDP1,transcription factor TFIIIB component B'' homolog
hum:XP_016865119.1	2624	Susscr4EVm000228t1	1866	ncbi:XP_005672583.2	1866	ENSSSCP00000017977.3	1866	EQ,Nc,Sm,na	BDP1,transcription factor TFIIIB component B'' homolog isoform X1
hum:XP_011519920.1	2620	Susscr4EVm000187t8	2650	ncbi:XP_020956536.1	2651	ENSSSCP00000038105.1	2650	EQ,Ev,Sm,na	MYO9A,unconventional myosin-IXa isoform X3
hum:NP_065741.3	2617	Susscr4EVm000155t4	2678	ncbi:NP_001190196.1	2526	ENSSSCP00000015281.3	2526	Ev,Nc,Sm,na	ANKHD1,ANKHD1-EIF4EBP3 protein
hum:XP_005274423.1	2615	Susscr4EVm000173t3	2640	ncbi:XP_020918298.1	2633	ENSSSCP00000015867.3	2551	EQ,Nc,Sm,na	CEP295,centrosomal protein of 295 kDa isoform X4
hum:XP_011517822.1	2615	Susscr4EVm000195t3	2604	ncbi:XP_020920702.1	2681	ENSSSCP00000045814.1	2660	Nc,Sm,Ev,na	FAM208B,protein FAM208B isoform X8
hum:XP_016861487.1	2615	Susscr4EVm000185t26	2685	ncbi:XP_020924549.1	2617	ENSSSCP00000012195.3	2617	Ev,Nc,Sm,na	STAB1,stabilin-1 isoform X1
hum:NP_001265227.1	2614	Susscr4EVm000179t1	2604	ncbi:XP_005669320.2	2604	ENSSSCP00000037369.1	1898	EQ,Nc,Sm,Smlo,	COL6A5,collagen alpha-5(VI) chain isoform 1 precursor
hum:NP_056197.3	2610	Susscr4EVm000186t1	2633	ncbi:XP_013833590.2	2139	ENSSSCP00000002152.3	2139	Ev,Nc,Sm,Nclo,Smlo,	HECTD1,E3 ubiquitin-protein ligase HECTD1
hum:XP_011512879.1	2610	Susscr4EVm000167t1	2686	ncbi:XP_020924935.1	2727	ENSSSCP00000046736.1	2726	EQ,Sm,Ev,na	ITPR3,inositol 1,4,5-trisphosphate receptor type 3 isoform X1
hum:XP_011528760.1	2610	Susscr4EVm000202t1	2630	ncbi:XP_020929341.1	2607	ENSSSCP00000010627.3	2463	Ev,Nc,Sm,na	MYO18B,unconventional myosin-XVIIIb isoform X1
hum:XP_005265035.1	2609	Susscr4EVm000148t1	2684	ncbi:XP_020934608.1	2696	ENSSSCP00000017562.2	2671	Nc,Ev,Sm,na	FLNB,filamin-B isoform X1
hum:XP_016861178.1	2609	Susscr4EVm000112t1	2599	ncbi:XP_005669576.1	2599	ENSSSCP00000036044.1	2599	EQ,Nc,Sm,na	COL7A1,collagen alpha-1(VII) chain isoform X3
hum:XP_011529849.1	2605	Susscr4EVm000159t9	2611	ncbi:XP_020956379.1	2765	ENSSSCP00000044762.1	2765	EQ,Sm,Ev,na	CENPE,centromere-associated protein E isoform X4
hum:NP_115593.3	2603	Susscr4EVm000189t1	2599	ncbi:XP_020956038.1	2625	ENSSSCP00000015281.3	2529	Nc,Ev,Sm,na	ANKRD17,ankyrin repeat domain-containing protein 17 isoform a
hum:XP_011509253.1	2598	Susscr4EVm000209t25	2156	ncbi:XP_020930634.1	2598	ENSSSCP00000058038.1	2315	Nc,Sm,Ev,Smlo,Evlo,	ABCA12,ATP-binding cassette sub-family A member 12 isoform X1
hum:XP_011509962.1	2598	Susscr4EVm000134t13	2694	ncbi:XP_020924322.1	2748	ENSSSCP00000058214.1	2702	Nc,Sm,Ev,na	NBEAL1,neurobeachin-like protein 1 isoform X4
hum:XP_006711705.1	2592	Susscr4EVm000197t1	2521	ncbi:XP_020946303.1	2550	ENSSSCP00000020330.2	2521	Nc,Ev,Sm,na	PDE4DIP,myomegalin isoform X1
hum:XP_011510649.1	2591	Susscr4EVm000194t1	2603	ncbi:XP_020925938.1	2603	ENSSSCP00000058878.1	2603	EQ,Nc,Sm,na	POLQ,DNA polymerase theta isoform X1
hum:XP_006720161.1	2590	Susscr4EVm000208t2	2592	ncbi:XP_020954808.1	2592	ENSSSCP00000048093.1	2592	EQ,Nc,Sm,na	RALGAPA1,ral GTPase-activating protein subunit alpha-1 isoform X1
hum:XP_011524424.1	2589	Susscr4EVm000198t1	2526	ncbi:XP_020948184.1	2528	ENSSSCP00000027090.2	2505	EQ,Ev,Sm,na	EPG5,ectopic P granules protein 5 homolog isoform X1
hum:XP_016866341.1	2587	Susscr4EVm000085t6	2617	ncbi:XP_020951728.1	2608	ENSSSCP00000036479.1	2611	EQ,Sm,Nc,na	LAMA2,laminin subunit alpha-2 isoform X5
hum:NP_001338373.1	2583	Susscr4EVm000158t1	2586	ncbi:XP_003121328.1	2586	ENSSSCP00000052491.1	2586	EQ,Nc,Sm,na	ZNF292,zinc finger protein 292 isoform 2
hum:NP_001164100.1	2581	Susscr4EVm000182t7	2640	ncbi:XP_020954951.1	2640	ENSSSCP00000002325.3	2583	EQ,Nc,Sm,na	CHD8,chromodomain-helicase-DNA-binding protein 8 isoform 1
hum:XP_005277499.2	2581	Susscr4EVm000197t1	2547	ncbi:XP_020946305.1	2548	ENSSSCP00000020330.2	2547	EQ,Ev,Sm,na	PDE4DIP,myomegalin isoform X3
hum:XP_016877792.1	2580	Susscr4EVm000006t315	2245	ncbi:XP_020940552.1	2381	ENSSSCP00000005106.2	2391	Sm,Nc,Ev,na	SPTBN5,spectrin beta chain, non-erythrocytic 5 isoform X5
hum:XP_016871851.1	2579	Susscr4EVm000195t2	2533	ncbi:XP_020920707.1	2588	ENSSSCP00000011876.3	2583	EQ,Sm,Ev,na	FAM208B,protein FAM208B isoform X10
hum:XP_016865157.1	2577	Susscr4EVm000142t47	2657	ncbi:XP_005667228.2	2656	ENSSSCP00000015815.3	2630	EQ,Nc,Sm,na	TENM2,teneurin-2 isoform X12
hum:XP_016877205.1	2576	Susscr4EVm000058t4	1742	ncbi:XP_020954883.1	2569	ENSSSCP00000031599.1	2569	EQ,Sm,Ev,Evlo,	ZFHX2,zinc finger homeobox protein 2 isoform X3
hum:XP_005272732.1	2575	Susscr4EVm000183t1	2692	ncbi:XP_020953471.1	2692	ENSSSCP00000023119.2	2674	EQ,Nc,Sm,na	USP9X,probable ubiquitin carboxyl-terminal hydrolase FAF-X isoform X1
hum:XP_011531934.1	2572	Susscr4EVm000199t1	2592	ncbi:XP_020924363.1	2577	ENSSSCP00000049524.1	2307	Ev,Nc,Sm,Smlo,	SETD2,histone-lysine N-methyltransferase SETD2 isoform X4
hum:NP_476507.3	2570	Susscr4EVm000082t201	2610	ncbi:XP_020931400.1	2608	ENSSSCP00000037369.1	1969	EQ,Nc,Sm,Smlo,	COL6A3,collagen alpha-3(VI) chain isoform 4 precursor
hum:XP_006720482.1	2568	Susscr4EVm003067t1	904	ncbi:XP_020953957.1	2650	ENSSSCP00000052661.1	2586	Nc,Sm,Ev,Evfr,Evlo,	ACAN,aggrecan core protein isoform X1
hum:XP_006717272.1	2567	Susscr4EVm000206t1	1973	ncbi:XP_013849192.2	1973	ENSSSCP00000033331.1	1973	EQ,Nc,Sm,na	ZNF462,zinc finger protein 462 isoform X1
hum:XP_011517823.1	2567	Susscr4EVm000195t2	2533	ncbi:XP_020920708.1	2584	ENSSSCP00000011876.3	2584	EQ,Sm,Ev,na	FAM208B,protein FAM208B isoform X11
hum:XP_011508474.1	2566	Susscr4EVm000197t15	2420	ncbi:XP_020946307.1	2503	ENSSSCP00000007152.3	2420	Nc,Ev,Sm,na	PDE4DIP,myomegalin isoform X4
hum:XP_011512724.1	2566	Susscr4EVm000191t1	2566	ncbi:XP_020954395.1	2606	ENSSSCP00000048218.1	2566	Nc,Ev,Sm,na	CUL9,cullin-9 isoform X1
hum:NP_066022.2	2564	Susscr4EVm000230t1	2450	ncbi:XP_020950053.1	2565	ENSSSCP00000031537.1	2565	EQ,Sm,Ev,na	SPTBN4,spectrin beta chain, non-erythrocytic 4 isoform sigma1
hum:XP_006721247.1	2564	Susscr4EVm000184t1	2622	ncbi:XP_020952693.1	2598	ENSSSCP00000034051.1	2597	Ev,Nc,Sm,na	ANKRD11,ankyrin repeat domain-containing protein 11 isoform X5
hum:XP_005254765.1	2557	Susscr4EVm000192t9	2618	ncbi:XP_020921311.1	2595	ENSSSCP00000041366.1	2575	Ev,Nc,Sm,na	TLN2,talin-2 isoform X1
hum:XP_016878186.1	2556	Susscr4EVm000023t73	2597	ncbi:XP_020931002.1	2573	ENSSSCP00000044136.1	2573	Ev,Nc,Sm,na	HERC2,E3 ubiquitin-protein ligase HERC2 isoform X4
hum:NP_004645.2	2555	Susscr4EVm000183t5	2670	ncbi:XP_020953471.1	2667	ENSSSCP00000023119.2	2650	EQ,Nc,Sm,na	USP9Y,probable ubiquitin carboxyl-terminal hydrolase FAF-Y
hum:NP_060087.3	2555	Susscr4EVm000223t1	2561	ncbi:XP_020946349.1	2552	ENSSSCP00000050060.1	2550	EQ,Nc,Sm,na	NOTCH1,neurogenic locus notch homolog protein 1 preproprotein
hum:XP_011507507.1	2554	Susscr4EVm000067t3	2210	ncbi:XP_003122123.2	2203	ENSSSCP00000005851.3	2203	EQ,Nc,Sm,na	CR1,complement receptor type 1 isoform X1
hum:XP_011529851.1	2553	Susscr4EVm000159t8	2762	ncbi:XP_020956379.1	2763	ENSSSCP00000044762.1	2762	EQ,Ev,Sm,na	CENPE,centromere-associated protein E isoform X6
hum:NP_060034.9	2551	Susscr4EVm000210t1	2552	ncbi:XP_020948306.1	2552	ENSSSCP00000000911.3	2555	EQ,Ev,Nc,na	STAB2,stabilin-2 precursor
hum:NP_004949.1	2549	Susscr4EVm000204t1	2564	ncbi:XP_003127632.3	2549	ENSSSCP00000048479.1	2549	Ev,Nc,Sm,na	MTOR,serine/threonine-protein kinase mTOR
hum:XP_016858364.1	2545	Susscr4EVm000197t5	2506	ncbi:XP_020946312.1	2512	ENSSSCP00000020330.2	2502	EQ,Ev,Sm,na	PDE4DIP,myomegalin isoform X6
hum:XP_016876613.1	2545	Susscr4EVm000200t2	2556	ncbi:XP_020955055.1	2547	ENSSSCP00000002495.3	2547	EQ,Nc,Sm,na	ZFYVE26,zinc finger FYVE domain-containing protein 26 isoform X1
hum:XP_006720163.1	2543	Susscr4EVm000208t1	2552	ncbi:XP_020954808.1	2592	ENSSSCP00000048093.1	2592	EQ,Sm,Ev,na	RALGAPA1,ral GTPase-activating protein subunit alpha-1 isoform X3
hum:NP_001333178.1	2542	Susscr4EVm000208t1	2554	ncbi:XP_020954813.1	2544	ENSSSCP00000058283.1	2544	Ev,Nc,Sm,na	RALGAPA1,ral GTPase-activating protein subunit alpha-1 isoform 8
hum:NP_060217.1	2542	Susscr4EVm000155t22	2628	ncbi:NP_001190196.1	2545	ENSSSCP00000015281.3	2545	Ev,Nc,Sm,na	ANKHD1,ankyrin repeat and KH domain-containing protein 1 isoform 1
hum:XP_011537690.1	2542	Susscr4EVm001776t1	1189	ncbi:XP_020929376.1	1780	ENSSSCP00000003229.3	1233	Nc,Sm,Ev,Smlo,Evlo,	DMBT1,deleted in malignant brain tumors 1 protein isoform X1
hum:XP_016868601.1	2541	Susscr4EVm000048t7	2547	ncbi:XP_020946261.1	2540	ENSSSCP00000045722.1	2540	EQ,Nc,Sm,na	VPS13B,vacuolar protein sorting-associated protein 13B isoform X10
hum:NP_116165.1	2540	Susscr4EVm000188t2	2543	ncbi:XP_020929304.1	2559	ENSSSCP00000044031.1	2543	Nc,Ev,Sm,na	JMJD1C,probable JmjC domain-containing histone demethylation protein 2C isoform a
hum:XP_005258164.1	2538	Susscr4EVm000127t1	2552	ncbi:XP_020951678.1	2552	ENSSSCP00000003978.3	2469	EQ,Nc,Sm,na	CEP192,centrosomal protein of 192 kDa isoform X1
hum:XP_016874762.1	2536	Susscr4EVm000119t1	2136	ncbi:XP_020948728.1	2303	ENSSSCP00000046835.1	2303	EQ,Sm,Ev,na	PTPRQ,phosphatidylinositol phosphatase PTPRQ isoform X1
hum:NP_001073897.2	2535	Susscr4EVm000142t10	2613	ncbi:XP_005667228.2	2609	ENSSSCP00000015815.3	2613	EQ,Sm,Nc,na	TENM2,teneurin-2 isoform 2
hum:XP_016871853.1	2533	Susscr4EVm000195t1	2481	ncbi:XP_020920707.1	2588	ENSSSCP00000011876.3	2583	EQ,Sm,Ev,na	FAM208B,protein FAM208B isoform X12
hum:XP_011537693.1	2532	Susscr4EVm001776t2	1189	ncbi:XP_020929376.1	1780	ENSSSCP00000003229.3	1233	Nc,Sm,Ev,Smlo,Evlo,	DMBT1,deleted in malignant brain tumors 1 protein isoform X5
hum:NP_940980.3	2527	Susscr4EVm000211t1	2528	ncbi:NP_001106908.2	2528	ENSSSCP00000000832.3	2528	EQ,Nc,Sm,na	LRRK2,leucine-rich repeat serine/threonine-protein kinase 2
hum:NP_694996.5	2526	Susscr4EVm000179t1	2527	ncbi:XP_005669321.2	2528	ENSSSCP00000037369.1	1898	EQ,Ev,Sm,Smlo,	COL6A5,collagen alpha-5(VI) chain isoform 2 precursor
hum:XP_005256923.1	2524	Susscr4EVm000235t11	2556	ncbi:XP_020921950.1	2532	ENSSSCP00000019114.3	2536	Ev,Sm,Nc,na	NCOR1,nuclear receptor corepressor 1 isoform X1
hum:XP_005252533.1	2521	Susscr4EVm000195t1	2481	ncbi:XP_020920708.1	2584	ENSSSCP00000011876.3	2584	EQ,Sm,Ev,na	FAM208B,protein FAM208B isoform X13
hum:XP_011537700.1	2521	Susscr4EVm001776t14	1188	ncbi:XP_020929376.1	1782	ENSSSCP00000003229.3	1233	Nc,Sm,Ev,Smlo,Evlo,	DMBT1,deleted in malignant brain tumors 1 protein isoform X11
hum:NP_001291744.1	2517	Susscr4EVm000212t2	2527	ncbi:XP_020950082.1	2527	ENSSSCP00000003278.3	1589	EQ,Nc,Sm,Smfr,Smlo,	CIC,protein capicua homolog isoform CIC-L
hum:NP_001280555.1	2515	Susscr4EVm000356t1	2113	ncbi:XP_020934752.1	2458	ENSSSCP00000038364.1	2038	Nc,Ev,Sm,Evlo,Smlo,	MGAM2,putative maltase-glucoamylase-like protein FLJ16351
hum:XP_024307200.1	2515	Susscr4EVm000212t1	2525	ncbi:XP_020950082.1	2527	ENSSSCP00000003278.3	1588	EQ,Ev,Sm,Smfr,Smlo,	CIC,protein capicua homolog isoform X6
hum:NP_006303.4	2514	Susscr4EVm000084t1	2504	ncbi:NP_001038041.1	2464	ENSSSCP00000010425.2	2465	Ev,Sm,Nc,na	NCOR2,nuclear receptor corepressor 2 isoform 1
hum:NP_075461.2	2512	Susscr4EVm000532t1	1849	ncbi:XP_020939369.1	2514	ENSSSCP00000033612.1	2515	EQ,Nc,Ev,Evlo,	CACNA1A,voltage-dependent P/Q-type calcium channel subunit alpha-1A isoform 2
hum:NP_004095.4	2511	Susscr4EVm000171t1	2561	ncbi:NP_001093400.1	2514	ENSSSCP00000021647.2	2514	Ev,Nc,Sm,na	FASN,fatty acid synthase
hum:XP_006717308.1	2510	Susscr4EVm000226t15	2510	ncbi:XP_013849361.2	2510	ENSSSCP00000006854.3	2504	EQ,Nc,Sm,na	SPTAN1,spectrin alpha chain, non-erythrocytic 1 isoform X1
hum:XP_005273038.2	2509	Susscr4EVm000197t5	2518	ncbi:XP_020946315.1	2514	ENSSSCP00000020330.2	2512	EQ,Nc,Sm,na	PDE4DIP,myomegalin isoform X9
hum:XP_011530467.1	2507	Susscr4EVm000219t1	2509	ncbi:XP_013834505.2	2508	ENSSSCP00000047811.1	2511	EQ,Ev,Nc,na	PTPN13,tyrosine-protein phosphatase non-receptor type 13 isoform X1
hum:XP_006717309.1	2505	Susscr4EVm000226t3	2510	ncbi:XP_013849361.2	2510	ENSSSCP00000006854.3	2499	EQ,Nc,Sm,na	SPTAN1,spectrin alpha chain, non-erythrocytic 1 isoform X2
hum:XP_024305106.1	2505	Susscr4EVm000124t4	2450	ncbi:XP_020920866.1	2492	ENSSSCP00000009980.3	2479	Nc,Sm,Ev,na	NBEA,neurobeachin isoform X9
hum:NP_001193583.1	2504	Susscr4EVm000235t31	1999	ncbi:NP_001038041.1	1699	ENSSSCP00000010425.2	1700	Ev,Sm,Nc,Smlo,Nclo,	NCOR2,nuclear receptor corepressor 2 isoform 3
hum:XP_006717317.1	2498	Susscr4EVm000226t26	2503	ncbi:XP_005663276.2	2504	ENSSSCP00000006854.3	2504	EQ,Sm,Ev,na	SPTAN1,spectrin alpha chain, non-erythrocytic 1 isoform X3
hum:XP_006711709.1	2495	Susscr4EVm000197t15	2424	ncbi:XP_020946335.1	2453	ENSSSCP00000007152.3	2424	Nc,Ev,Sm,na	PDE4DIP,myomegalin isoform X10
hum:NP_000480.3	2492	Susscr4EVm000216t2	2544	ncbi:XP_003360423.5	2496	ENSSSCP00000013229.3	2496	Ev,Nc,Sm,na	ATRX,transcriptional regulator ATRX isoform 1
hum:NP_000867.2	2491	Susscr4EVm000150t2	2488	ncbi:NP_001231402.1	2494	ENSSSCP00000004370.3	2494	EQ,Sm,Ev,na	IGF2R,cation-independent mannose-6-phosphate receptor precursor
hum:XP_005262210.2	2491	Susscr4EVm000216t2	2544	ncbi:XP_020935739.1	2496	ENSSSCP00000013229.3	2496	Ev,Nc,Sm,na	ATRX,transcriptional regulator ATRX isoform X1
hum:XP_006717310.1	2490	Susscr4EVm000226t2	2510	ncbi:XP_013849361.2	2510	ENSSSCP00000006854.3	2484	EQ,Nc,Sm,na	SPTAN1,spectrin alpha chain, non-erythrocytic 1 isoform X4
hum:XP_006717311.1	2489	Susscr4EVm000226t1	2498	ncbi:XP_013849361.2	2489	ENSSSCP00000006854.3	2483	EQ,Nc,Sm,na	SPTAN1,spectrin alpha chain, non-erythrocytic 1 isoform X5
hum:NP_001231892.1	2488	Susscr4EVm000263t1	2552	ncbi:XP_020948732.1	2558	ENSSSCP00000026430.2	2558	EQ,Sm,Ev,na	NAV2,neuron navigator 2 isoform 5
hum:XP_016866048.1	2485	Susscr4EVm000222t1	2500	ncbi:XP_005659468.2	2485	ENSSSCP00000025886.2	2485	Ev,Nc,Sm,na	DOPEY1,protein dopey-1 isoform X1
hum:XP_005246454.1	2483	Susscr4EVm000220t1	2438	ncbi:XP_003133690.2	2453	ENSSSCP00000017132.3	2438	Nc,Ev,Sm,na	FN1,fibronectin isoform X1
hum:XP_016858367.1	2483	Susscr4EVm000197t67	2412	ncbi:XP_020946307.1	2466	ENSSSCP00000052634.1	2412	Nc,Ev,Sm,na	PDE4DIP,myomegalin isoform X11
hum:XP_006717927.2	2482	Susscr4EVm000290t43	1565	ncbi:XP_020929397.1	2485	ENSSSCP00000025708.2	2482	EQ,Sm,Ev,Evfr,Evlo,	MKI67,proliferation marker protein Ki-67 isoform X2
hum:NP_001138890.1	2481	Susscr4EVm000224t7	2497	ncbi:XP_020929710.1	2481	ENSSSCP00000024341.2	2171	Ev,Nc,Sm,Smlo,	TTC28,tetratricopeptide repeat protein 28
hum:NP_001123910.1	2477	Susscr4EVm000226t1	2498	ncbi:XP_005663276.2	2483	ENSSSCP00000006854.3	2483	Ev,Nc,Sm,na	SPTAN1,spectrin alpha chain, non-erythrocytic 1 isoform 1
hum:NP_001186871.1	2476	Susscr4EVm000222t1	2500	ncbi:XP_020947483.1	2485	ENSSSCP00000025886.2	2485	Ev,Nc,Sm,na	DOPEY1,protein dopey-1 isoform b
hum:NP_060621.3	2472	Susscr4EVm000225t1	2483	ncbi:XP_003359765.2	2483	ENSSSCP00000034147.1	2483	EQ,Nc,Sm,na	RIF1,telomere-associated protein RIF1 isoform 1
hum:NP_077719.2	2471	Susscr4EVm000201t2	2555	ncbi:XP_020936696.1	2550	ENSSSCP00000050060.1	2550	EQ,Nc,Sm,na	NOTCH2,neurogenic locus notch homolog protein 2 isoform 1 preproprotein
hum:XP_006717315.1	2469	Susscr4EVm000226t65	2494	ncbi:XP_013849361.2	2489	ENSSSCP00000006854.3	2463	EQ,Nc,Sm,na	SPTAN1,spectrin alpha chain, non-erythrocytic 1 isoform X10
hum:NP_005900.2	2468	Susscr4EVm000227t1	2476	ncbi:XP_003134080.1	2476	ENSSSCP00000056865.1	2476	EQ,Nc,Sm,na	MAP1B,microtubule-associated protein 1B isoform 1
hum:NP_997698.1	2466	Susscr4EVm000209t3	2488	ncbi:XP_020936887.1	2415	ENSSSCP00000007345.3	2003	Ev,Nc,Sm,Smlo,	ABCA2,ATP-binding cassette sub-family A member 2 isoform b
hum:NP_001337450.1	2460	Susscr4EVm000197t15	2465	ncbi:XP_020946311.1	2519	ENSSSCP00000048318.1	2454	Nc,Ev,Sm,na	PDE4DIP,myomegalin isoform 11
hum:NP_001084.3	2458	Susscr4EVm000229t1	2458	ncbi:NP_001193328.1	2458	ENSSSCP00000010604.3	2458	EQ,Nc,Sm,na	ACACB,acetyl-CoA carboxylase 2 precursor
hum:XP_016857732.1	2458	Susscr4EVm000491t1	1903	ncbi:XP_020958273.1	2461	ENSSSCP00000016478.3	2461	EQ,Sm,Ev,Evlo,	CACNA1E,voltage-dependent R-type calcium channel subunit alpha-1E isoform X1
hum:XP_011522063.1	2457	Susscr4EVm000267t1	2419	ncbi:XP_020923690.1	1357	ENSSSCP00000056469.1	1162	Ev,Nc,Sm,Ncfr,Nclo,Smfr,Smlo,	MPRIP,myosin phosphatase Rho-interacting protein isoform X1
hum:XP_005256932.1	2448	Susscr4EVm000084t2	2430	ncbi:XP_020921950.1	1597	ENSSSCP00000019114.3	1601	Ev,Sm,Nc,Smfr,Smlo,Ncfr,Nclo,	NCOR1,nuclear receptor corepressor 1 isoform X12
hum:XP_016858370.1	2447	Susscr4EVm000197t1	2512	ncbi:XP_020946315.1	2514	ENSSSCP00000020330.2	2512	EQ,Ev,Sm,na	PDE4DIP,myomegalin isoform X15
hum:NP_006725.3	2446	Susscr4EVm000231t1	2453	ncbi:XP_005659224.1	2446	ENSSSCP00000046415.1	2446	EQ,Nc,Sm,na	HIVEP2,transcription factor HIVEP2
hum:XP_016869287.1	2445	0	0	ncbi:XP_020944233.1	2417	ENSSSCP00000006358.3	1216	Nc,Sm,Ev,Smfr,Smlo,Evmi,Evlo,	TG,thyroglobulin isoform X8
hum:NP_079413.3	2443	Susscr4EVm000234t2	2443	ncbi:XP_020952112.1	2440	ENSSSCP00000022557.2	2440	EQ,Nc,Sm,na	SPG11,spatacsin isoform 1
hum:XP_016863885.1	2443	Susscr4EVm000142t48	2472	ncbi:XP_005667228.2	2466	ENSSSCP00000015815.3	2466	EQ,Nc,Sm,na	TENM3,teneurin-3 isoform X9
hum:NP_004371.2	2442	Susscr4EVm000137t17	2470	ncbi:XP_005662241.2	2445	ENSSSCP00000008490.3	2445	Ev,Nc,Sm,na	CREBBP,CREB-binding protein isoform a
hum:NP_009117.2	2442	Susscr4EVm000181t2	2467	ncbi:XP_001929443.1	2446	ENSSSCP00000025701.2	2446	Ev,Nc,Sm,na	CEP250,centrosome-associated protein CEP250 isoform 1
hum:XP_016864938.1	2441	Susscr4EVm000207t2	2415	ncbi:XP_020932418.1	2445	ENSSSCP00000020962.2	2445	EQ,Sm,Ev,na	MAST4,microtubule-associated serine/threonine-protein kinase 4 isoform X2
hum:NP_005952.2	2439	Susscr4EVm001304t1	1224	ncbi:XP_020938133.1	1344	ENSSSCP00000026525.2	1658	Sm,Nc,Ev,Nclo,Evlo,	MUC6,mucin-6 precursor
hum:XP_011538292.1	2435	Susscr4EVm000087t1	2391	ncbi:XP_020928683.1	2391	ENSSSCP00000009843.3	1746	EQ,Nc,Sm,Smlo,	WDFY4,WD repeat- and FYVE domain-containing protein 4 isoform X4
hum:NP_055998.1	2434	Susscr4EVm000207t2	2438	ncbi:XP_020932417.1	2463	ENSSSCP00000040924.1	2425	Nc,Ev,Sm,na	MAST4,microtubule-associated serine/threonine-protein kinase 4 isoform a
hum:XP_006711713.1	2432	Susscr4EVm000197t20	2387	ncbi:XP_020946332.1	2388	ENSSSCP00000037292.1	2359	EQ,Ev,Sm,na	PDE4DIP,myomegalin isoform X18
hum:NP_001308712.1	2430	Susscr4EVm000195t1	2447	ncbi:XP_020920700.1	2447	ENSSSCP00000049073.1	2447	EQ,Nc,Sm,na	FAM208B,protein FAM208B isoform 1
hum:NP_001284580.1	2429	Susscr4EVm000207t2	2452	ncbi:XP_020932410.1	2439	ENSSSCP00000057179.1	2432	Ev,Nc,Sm,na	MAST4,microtubule-associated serine/threonine-protein kinase 4 isoform g
hum:NP_001305963.1	2428	Susscr4EVm000006t1	2215	ncbi:XP_020946022.1	1960	ENSSSCP00000059540.1	1987	Ev,Sm,Nc,Smlo,Nclo,	DSP,desmoplakin isoform Ia
hum:NP_758859.1	2427	Susscr4EVm000170t1	2427	ncbi:XP_020940063.1	2434	ENSSSCP00000014933.3	2434	EQ,Sm,Ev,na	NSD1,histone-lysine N-methyltransferase, H3 lysine-36 and H4 lysine-20 specific isoform a
hum:NP_620305.2	2426	Susscr4EVm000245t6	2334	ncbi:XP_003358980.1	1925	ENSSSCP00000048634.1	1925	Ev,Nc,Sm,Nclo,Smlo,	SON,protein SON isoform F
hum:XP_016874009.1	2424	Susscr4EVm000263t1	2463	ncbi:XP_020948737.1	2478	ENSSSCP00000026430.2	2470	EQ,Sm,Ev,na	NAV2,neuron navigator 2 isoform X9
hum:XP_011541686.1	2423	Susscr4EVm000207t2	2439	ncbi:XP_020932419.1	2427	ENSSSCP00000017965.3	2406	Ev,Nc,Sm,na	MAST4,microtubule-associated serine/threonine-protein kinase 4 isoform X4
hum:XP_011512317.1	2421	Susscr4EVm000146t1	2421	ncbi:XP_013840191.2	2421	ENSSSCP00000055146.1	2421	EQ,Nc,Sm,na	NIPBL,nipped-B-like protein isoform X6
hum:XP_024306835.1	2416	Susscr4EVm000197t75	2374	ncbi:XP_020946347.1	2482	ENSSSCP00000021848.2	2339	Nc,Ev,Sm,na	PDE4DIP,myomegalin isoform X22
hum:XP_016875415.1	2412	Susscr4EVm000316t1	2357	ncbi:XP_020948640.1	2240	ENSSSCP00000041051.1	2149	Ev,Nc,Sm,na	CACNA1C,voltage-dependent L-type calcium channel subunit alpha-1C isoform X1
hum:XP_011541688.1	2411	Susscr4EVm000207t2	2415	ncbi:XP_020932416.1	2415	ENSSSCP00000017965.3	2415	EQ,Nc,Sm,na	MAST4,microtubule-associated serine/threonine-protein kinase 4 isoform X7
hum:NP_078779.2	2406	Susscr4EVm000249t1	2413	ncbi:XP_020952597.1	2413	ENSSSCP00000039882.1	2407	EQ,Nc,Sm,na	HIVEP3,transcription factor HIVEP3 isoform a
hum:XP_006722671.2	2404	Susscr4EVm000289t1	2315	ncbi:NP_001193360.1	2315	ENSSSCP00000037191.1	2320	EQ,Ev,Nc,na	APC2,adenomatous polyposis coli protein 2 isoform X1
hum:XP_011511585.1	2401	Susscr4EVm000098t13	2477	ncbi:XP_020932800.1	2449	ENSSSCP00000017776.3	2465	Ev,Sm,Nc,na	KALRN,kalirin isoform X11
hum:NP_849188.4	2400	Susscr4EVm003099t1	263	ncbi:XP_020928723.1	2228	ENSSSCP00000020598.2	1113	Nc,Sm,Ev,Smfr,Smlo,Evfr,Evlo,	RP1L1,retinitis pigmentosa 1-like 1 protein
hum:XP_016858374.1	2399	Susscr4EVm000197t5	2410	ncbi:XP_020946303.1	2416	ENSSSCP00000020330.2	2404	EQ,Ev,Sm,na	PDE4DIP,myomegalin isoform X23
hum:XP_016862920.1	2398	Susscr4EVm000098t13	2477	ncbi:XP_020926913.1	2376	ENSSSCP00000017776.3	2354	Ev,Nc,Sm,na	KALRN,kalirin isoform X12
hum:XP_006718732.1	2397	Susscr4EVm000006t188	2397	ncbi:XP_020938428.1	2397	ENSSSCP00000037620.1	2365	EQ,Nc,Sm,na	SPTBN2,spectrin beta chain, non-erythrocytic 2 isoform X1
hum:XP_016858376.1	2397	Susscr4EVm000197t20	2354	ncbi:XP_020946307.1	2355	ENSSSCP00000037292.1	2326	EQ,Ev,Sm,na	PDE4DIP,myomegalin isoform X25
hum:XP_005246460.1	2393	Susscr4EVm000220t7	2358	ncbi:XP_003133690.2	1991	ENSSSCP00000036609.1	2370	Sm,Ev,Nc,Nclo,	FN1,fibronectin isoform X7
hum:XP_016880042.1	2391	Susscr4EVm000080t4	2333	ncbi:NP_001107741.1	2324	ENSSSCP00000047454.1	2395	Sm,Ev,Nc,na	ACACA,acetyl-CoA carboxylase 1 isoform X1
hum:NP_008877.1	2390	Susscr4EVm000006t220	2410	ncbi:XP_013833744.2	2405	ENSSSCP00000037620.1	2405	EQ,Nc,Sm,na	SPTBN2,spectrin beta chain, non-erythrocytic 2
hum:XP_011519307.1	2388	Susscr4EVm000239t45	1964	ncbi:XP_013853338.2	2210	ENSSSCP00000041087.1	2400	Sm,Nc,Ev,Evlo,	WNK1,serine/threonine-protein kinase WNK1 isoform X9
hum:NP_001019554.1	2385	Susscr4EVm000241t1	2500	ncbi:XP_020940960.1	2518	ENSSSCP00000052918.1	2500	Nc,Ev,Sm,na	NAV3,neuron navigator 3 isoform 1
hum:XP_016870167.1	2384	Susscr4EVm000168t2	2484	ncbi:NP_001116676.1	2515	ENSSSCP00000030534.2	2515	EQ,Sm,Ev,na	TNC,tenascin isoform X1
hum:NP_942131.1	2383	Susscr4EVm000080t3	2370	ncbi:XP_020921886.1	2377	ENSSSCP00000047454.1	2383	EQ,Nc,Ev,na	ACACA,acetyl-CoA carboxylase 1 isoform 1
hum:XP_005266191.1	2379	Susscr4EVm000257t114	2109	ncbi:XP_020936786.1	1229	ENSSSCP00000035562.1	1229	Ev,Nc,Sm,Ncfr,Nclo,Smfr,Smlo,	SEC16A,protein transport protein Sec16A isoform X1
hum:XP_016883593.1	2378	Susscr4EVm000163t8	2354	ncbi:XP_020933527.1	2329	ENSSSCP00000036104.1	2309	Ev,Nc,Sm,na	CHD6,chromodomain-helicase-DNA-binding protein 6 isoform X7
hum:NP_061496.2	2377	Susscr4EVm000260t17	2305	ncbi:XP_020922827.1	2388	ENSSSCP00000018611.3	2381	EQ,Sm,Ev,na	CACNA1G,voltage-dependent T-type calcium channel subunit alpha-1G isoform 1
hum:NP_057368.3	2376	Susscr4EVm000251t1	2383	ncbi:XP_020949612.1	2383	ENSSSCP00000023830.2	2383	EQ,Nc,Sm,na	CNOT1,CCR4-NOT transcription complex subunit 1 isoform a
hum:XP_011517551.1	2376	Susscr4EVm000257t11	1241	ncbi:XP_020936786.1	1226	ENSSSCP00000035562.1	1226	Ev,Nc,Sm,na	SEC16A,protein transport protein Sec16A isoform X2
hum:NP_056993.2	2371	Susscr4EVm000174t1	2383	ncbi:XP_020943482.1	2376	ENSSSCP00000009190.3	2373	EQ,Nc,Sm,na	NBAS,neuroblastoma-amplified sequence
hum:XP_011509965.1	2371	Susscr4EVm000134t9	2451	ncbi:XP_020924308.1	2496	ENSSSCP00000058214.1	2478	Nc,Sm,Ev,na	NBEAL1,neurobeachin-like protein 1 isoform X6
hum:XP_024308538.1	2368	Susscr4EVm000220t18	2355	ncbi:XP_003133690.2	2055	ENSSSCP00000036609.1	2370	Sm,Ev,Nc,Nclo,	FN1,fibronectin isoform X11
hum:NP_001004334.3	2367	Susscr4EVm001516t1	909	ncbi:XP_020922737.1	2400	ENSSSCP00000025840.2	2384	Nc,Sm,Ev,Evfr,Evlo,	GPR179,probable G-protein coupled receptor 179 precursor
hum:NP_001034230.1	2365	Susscr4EVm000424t1	1789	ncbi:XP_020947161.1	1834	ENSSSCP00000024566.2	591	Nc,Ev,Sm,Smfr,Smlo,	TRIOBP,TRIO and F-actin-binding protein isoform 6
hum:XP_005260321.1	2365	Susscr4EVm000181t17	1807	ncbi:XP_020933921.1	1807	ENSSSCP00000055943.1	2176	Sm,Ev,Nc,Evlo,Nclo,	CEP250,centrosome-associated protein CEP250 isoform X4
hum:NP_003119.2	2364	Susscr4EVm000006t191	2400	ncbi:XP_020938429.1	2400	ENSSSCP00000032942.1	2400	EQ,Nc,Sm,na	SPTBN1,spectrin beta chain, non-erythrocytic 1 isoform 1
hum:NP_003283.2	2363	Susscr4EVm000232t1	2367	ncbi:XP_013833352.2	2367	ENSSSCP00000016515.3	2363	EQ,Nc,Sm,na	TPR,nucleoprotein TPR
hum:XP_005246464.1	2363	Susscr4EVm000220t10	2374	ncbi:XP_003133690.2	2083	ENSSSCP00000036609.1	2382	EQ,Ev,Nc,Nclo,	FN1,fibronectin isoform X12
hum:XP_011543206.1	2363	Susscr4EVm000238t11	2390	ncbi:XP_020918146.1	2344	ENSSSCP00000015754.3	2344	Ev,Nc,Sm,na	C2CD3,C2 domain-containing protein 3 isoform X1
hum:NP_001185763.3	2362	Susscr4EVm000197t26	2403	ncbi:XP_020946344.1	2403	ENSSSCP00000037292.1	2403	EQ,Nc,Sm,na	PDE4DIP,myomegalin isoform 9
hum:NP_001277156.1	2362	Susscr4EVm000207t2	2395	ncbi:XP_020932426.1	2365	ENSSSCP00000057179.1	2365	Ev,Nc,Sm,na	MAST4,microtubule-associated serine/threonine-protein kinase 4 isoform e
hum:XP_005246465.1	2362	Susscr4EVm000220t8	2356	ncbi:XP_003133690.2	1991	ENSSSCP00000036609.1	2370	Sm,Ev,Nc,Nclo,	FN1,fibronectin isoform X13
hum:XP_005246466.1	2361	Susscr4EVm000220t5	2379	ncbi:XP_003133690.2	2063	ENSSSCP00000036609.1	2386	EQ,Ev,Nc,Nclo,	FN1,fibronectin isoform X15
hum:XP_005268859.1	2361	Susscr4EVm000145t1	2075	ncbi:XP_013853567.1	2361	ENSSSCP00000001010.3	2327	Nc,Sm,Ev,Evlo,	OTOGL,otogelin-like protein isoform X1
hum:XP_011517553.1	2359	Susscr4EVm000257t111	2027	ncbi:XP_020936786.1	1229	ENSSSCP00000042238.1	2093	Sm,Ev,Nc,Ncfr,Nclo,	SEC16A,protein transport protein Sec16A isoform X4
hum:XP_011534286.2	2359	Susscr4EVm000434t1	1960	ncbi:XP_020927531.1	1994	ENSSSCP00000042400.1	1887	Nc,Ev,Sm,na	ARID1B,AT-rich interactive domain-containing protein 1B isoform X1
hum:NP_001269877.1	2358	Susscr4EVm000188t1	2361	ncbi:XP_005671084.2	2361	ENSSSCP00000049548.1	2361	EQ,Nc,Sm,na	JMJD1C,probable JmjC domain-containing histone demethylation protein 2C isoform c
hum:XP_006721026.1	2358	Susscr4EVm000260t1	2396	ncbi:XP_020922836.1	2413	ENSSSCP00000031360.1	2360	Nc,Ev,Sm,na	CACNA1H,voltage-dependent T-type calcium channel subunit alpha-1H isoform X1
hum:XP_011534351.1	2357	Susscr4EVm000268t1	2358	ncbi:XP_020944746.1	2365	ENSSSCP00000022600.2	2358	EQ,Ev,Sm,na	ROS1,proto-oncogene tyrosine-protein kinase ROS isoform X1
hum:XP_016859182.1	2356	Susscr4EVm000220t4	2379	ncbi:XP_003133690.2	1991	ENSSSCP00000036609.1	2393	Sm,Ev,Nc,Nclo,	FN1,fibronectin isoform X17
hum:XP_006720911.1	2355	Susscr4EVm000137t30	2453	ncbi:XP_005662241.2	2445	ENSSSCP00000008490.3	2445	EQ,Nc,Sm,na	CREBBP,CREB-binding protein isoform X3
hum:XP_016864940.1	2355	Susscr4EVm000207t2	2381	ncbi:XP_020932413.1	2359	ENSSSCP00000050900.1	2345	Ev,Nc,Sm,na	MAST4,microtubule-associated serine/threonine-protein kinase 4 isoform X9
hum:NP_065974.1	2354	Susscr4EVm000233t1	2471	ncbi:XP_005672178.1	2553	ENSSSCP00000017090.3	2553	EQ,Sm,Ev,na	ZDBF2,DBF4-type zinc finger-containing protein 2 isoform 1
hum:NP_001272478.1	2352	Susscr4EVm000233t1	2455	ncbi:XP_013839876.1	2551	ENSSSCP00000017090.3	2537	Nc,Sm,Ev,na	ZDBF2,DBF4-type zinc finger-containing protein 2 isoform 2
hum:NP_942592.1	2352	Susscr4EVm000189t4	2375	ncbi:XP_020956038.1	2390	ENSSSCP00000027093.2	2366	Nc,Ev,Sm,na	ANKRD17,ankyrin repeat domain-containing protein 17 isoform b
hum:NP_000123.1	2351	Susscr4EVm000329t1	2309	ncbi:NP_999332.2	2267	ENSSSCP00000028556.2	2267	Ev,Nc,Sm,na	F8,coagulation factor VIII isoform a preproprotein
hum:NP_001138947.1	2351	Susscr4EVm002580t1	587	ncbi:XP_020948750.1	1677	ENSSSCP00000023746.2	1588	Nc,Sm,Ev,Evfr,Evlo,	FAM186A,protein FAM186A
hum:XP_005264575.1	2351	Susscr4EVm000006t189	2373	ncbi:XP_020938428.1	2373	ENSSSCP00000032942.1	2354	EQ,Nc,Sm,na	SPTBN1,spectrin beta chain, non-erythrocytic 1 isoform X2
hum:XP_005265728.1	2351	Susscr4EVm000189t4	2375	ncbi:XP_020956039.1	2388	ENSSSCP00000027093.2	2366	Nc,Ev,Sm,na	ANKRD17,ankyrin repeat domain-containing protein 17 isoform X2
hum:XP_011525475.1	2351	Susscr4EVm000230t1	2228	ncbi:XP_020950054.1	2352	ENSSSCP00000031537.1	2343	EQ,Sm,Ev,na	SPTBN4,spectrin beta chain, non-erythrocytic 4 isoform X3
hum:XP_005267477.1	2349	Susscr4EVm000269t1	2350	ncbi:XP_020955078.1	2350	ENSSSCP00000002529.3	2350	EQ,Nc,Sm,na	PCNX1,pecanex-like protein 1 isoform X1
hum:NP_001005407.1	2347	Susscr4EVm000260t5	2382	ncbi:XP_020922836.1	2413	ENSSSCP00000031360.1	2355	Nc,Ev,Sm,na	CACNA1H,voltage-dependent T-type calcium channel subunit alpha-1H isoform b
hum:NP_004002.2	2344	Susscr4EVm000061t13	2330	ncbi:NP_001012408.1	2328	ENSSSCP00000023001.3	2316	EQ,Nc,Sm,na	DMD,dystrophin Dp260-1 isoform
hum:NP_938406.1	2343	Susscr4EVm000279t1	2287	ncbi:XP_020922827.1	2388	ENSSSCP00000018611.3	2381	EQ,Sm,Ev,na	CACNA1G,voltage-dependent T-type calcium channel subunit alpha-1G isoform 3
hum:NP_733468.3	2342	Susscr4EVm000272t1	2366	ncbi:XP_020953269.1	2372	ENSSSCP00000052821.1	1203	EQ,Ev,Sm,Smfr,Smlo,	KNL1,kinetochore scaffold 1 isoform 1
hum:XP_011516468.1	2340	Susscr4EVm000248t11	2402	ncbi:XP_020923849.1	2358	ENSSSCP00000048258.1	2358	Ev,Nc,Sm,na	CNTRL,centriolin isoform X1
hum:NP_000709.1	2339	Susscr4EVm000491t13	1821	ncbi:XP_020936695.1	2348	ENSSSCP00000033749.1	2349	EQ,Nc,Ev,Evlo,	CACNA1B,voltage-dependent N-type calcium channel subunit alpha-1B isoform 1
hum:XP_005256620.1	2339	Susscr4EVm000267t2	2301	ncbi:XP_020923693.1	1239	ENSSSCP00000050240.1	1029	Ev,Nc,Sm,Ncfr,Nclo,Smfr,Smlo,	MPRIP,myosin phosphatase Rho-interacting protein isoform X6
hum:XP_011512728.1	2339	Susscr4EVm000191t10	2348	ncbi:XP_020954395.1	2369	ENSSSCP00000051035.1	2343	Nc,Ev,Sm,na	CUL9,cullin-9 isoform X4
hum:NP_006436.3	2335	Susscr4EVm000246t1	2339	ncbi:XP_020923227.1	2335	ENSSSCP00000042460.1	2335	EQ,Nc,Sm,na	PRPF8,pre-mRNA-processing-splicing factor 8
hum:XP_024303906.1	2334	Susscr4EVm000271t1	2332	ncbi:XP_005668149.2	2336	ENSSSCP00000059351.1	2266	EQ,Ev,Sm,na	SVIL,supervillin isoform X1
hum:XP_016866062.1	2333	Susscr4EVm000222t3	2330	ncbi:XP_005659468.2	2321	ENSSSCP00000025886.2	2321	EQ,Nc,Sm,na	DOPEY1,protein dopey-1 isoform X10
hum:NP_938199.1	2332	Susscr4EVm000260t17	2354	ncbi:XP_020922845.1	2381	ENSSSCP00000018611.3	2381	EQ,Sm,Ev,na	CACNA1G,voltage-dependent T-type calcium channel subunit alpha-1G isoform 4
hum:XP_011534923.1	2331	Susscr4EVm000186t1	2353	ncbi:XP_020955537.1	1861	ENSSSCP00000002152.3	1860	Ev,Nc,Sm,Nclo,Smlo,	HECTD1,E3 ubiquitin-protein ligase HECTD1 isoform X6
hum:XP_016875655.1	2328	Susscr4EVm000241t1	2413	ncbi:XP_020940968.1	2440	ENSSSCP00000052918.1	2413	Nc,Ev,Sm,na	NAV3,neuron navigator 3 isoform X6
hum:XP_016865122.1	2327	Susscr4EVm000228t3	1659	ncbi:XP_005672583.2	1566	ENSSSCP00000039560.1	1566	Ev,Nc,Sm,na	BDP1,transcription factor TFIIIB component B'' homolog isoform X5
hum:XP_024309291.1	2326	Susscr4EVm000256t12	2342	ncbi:XP_020926229.1	2338	ENSSSCP00000038674.1	2337	EQ,Nc,Sm,na	MAP4,microtubule-associated protein 4 isoform X1
hum:NP_001888.2	2322	Susscr4EVm000262t1	2322	ncbi:XP_003128533.4	2322	ENSSSCP00000002048.3	2322	EQ,Nc,Sm,na	CSPG4,chondroitin sulfate proteoglycan 4 precursor
hum:NP_061836.2	2320	Susscr4EVm000261t1	2363	ncbi:XP_020926647.1	2330	ENSSSCP00000032085.1	2330	Ev,Nc,Sm,na	BRWD1,bromodomain and WD repeat-containing protein 1 isoform A
hum:XP_016877297.1	2320	Susscr4EVm000274t1	2323	ncbi:XP_020955520.1	2323	ENSSSCP00000050152.1	2323	EQ,Nc,Sm,na	AKAP6,A-kinase anchor protein 6 isoform X1
hum:XP_006717948.1	2316	Susscr4EVm000278t1	2328	ncbi:XP_020929664.1	2317	ENSSSCP00000047948.1	2317	Ev,Nc,Sm,na	PLCE1,1-phosphatidylinositol 4,5-bisphosphate phosphodiesterase epsilon-1 isoform X1
hum:XP_016864005.1	2316	Susscr4EVm000219t14	2318	ncbi:XP_013834505.2	1432	ENSSSCP00000025259.2	1737	Ev,Sm,Nc,Smlo,Ncfr,Nclo,	PTPN13,tyrosine-protein phosphatase non-receptor type 13 isoform X7
hum:XP_016866593.1	2316	Susscr4EVm000434t5	2005	ncbi:XP_020927545.1	1994	ENSSSCP00000042400.1	1844	Ev,Nc,Sm,na	ARID1B,AT-rich interactive domain-containing protein 1B isoform X3
hum:NP_002842.2	2315	Susscr4EVm000273t1	2328	ncbi:XP_003134783.1	2328	ENSSSCP00000035412.1	2328	EQ,Nc,Sm,na	PTPRZ1,receptor-type tyrosine-protein phosphatase zeta isoform 1 precursor
hum:XP_016866063.1	2315	Susscr4EVm000222t3	2291	ncbi:XP_003480357.2	2312	ENSSSCP00000025886.2	2282	Nc,Ev,Sm,na	DOPEY1,protein dopey-1 isoform X11
hum:NP_001243253.1	2314	Susscr4EVm000279t3	2343	ncbi:XP_020922845.1	2381	ENSSSCP00000018611.3	2381	EQ,Sm,Ev,na	CACNA1G,voltage-dependent T-type calcium channel subunit alpha-1G isoform 16
hum:XP_011517019.2	2314	Susscr4EVm000223t1	2330	ncbi:XP_020936696.1	2320	ENSSSCP00000050060.1	2320	Ev,Nc,Sm,na	NOTCH1,neurogenic locus notch homolog protein 1 isoform X1
hum:XP_011517561.1	2312	Susscr4EVm000257t3	1213	ncbi:XP_020936786.1	1207	ENSSSCP00000035562.1	1207	EQ,Nc,Sm,na	SEC16A,protein transport protein Sec16A isoform X13
hum:NP_938197.1	2306	Susscr4EVm000279t1	2333	ncbi:XP_020922845.1	2381	ENSSSCP00000018611.3	2381	EQ,Sm,Ev,na	CACNA1G,voltage-dependent T-type calcium channel subunit alpha-1G isoform 6
hum:XP_016875417.1	2306	Susscr4EVm000316t1	2351	ncbi:XP_013837233.1	2278	ENSSSCP00000041051.1	2147	Ev,Nc,Sm,na	CACNA1C,voltage-dependent L-type calcium channel subunit alpha-1C isoform X3
hum:NP_115571.2	2303	Susscr4EVm000245t16	1995	ncbi:XP_003358980.1	1925	ENSSSCP00000042846.1	1925	Ev,Nc,Sm,na	SON,protein SON isoform B
hum:XP_005255182.1	2303	Susscr4EVm000137t17	2341	ncbi:XP_001929248.2	2332	ENSSSCP00000056593.1	2382	Sm,Ev,Nc,na	CREBBP,CREB-binding protein isoform X4
hum:XP_011517228.1	2302	Susscr4EVm000308t1	2202	ncbi:XP_020943805.1	2212	ENSSSCP00000032105.1	2202	Nc,Ev,Sm,na	WNK2,serine/threonine-protein kinase WNK2 isoform X1
hum:XP_006711821.1	2301	Susscr4EVm000258t1	2322	ncbi:XP_020920100.1	2322	ENSSSCP00000037183.1	2280	EQ,Nc,Sm,na	AHCTF1,protein ELYS isoform X1
hum:NP_001307643.1	2298	Susscr4EVm000281t1	2309	ncbi:XP_003132811.2	2299	ENSSSCP00000012834.3	2308	EQ,Sm,Nc,na	DOPEY2,protein dopey-2
hum:XP_011533097.1	2298	Susscr4EVm000277t1	2219	ncbi:XP_020929603.1	2219	ENSSSCP00000051522.1	2219	EQ,Nc,Sm,na	POLE,DNA polymerase epsilon catalytic subunit A isoform X1
hum:NP_001269323.1	2297	Susscr4EVm000308t10	2277	ncbi:XP_020943808.1	2315	ENSSSCP00000032105.1	2277	Nc,Ev,Sm,na	WNK2,serine/threonine-protein kinase WNK2 isoform 1
hum:XP_024309292.1	2295	Susscr4EVm000256t4	2338	ncbi:XP_005669546.1	2337	ENSSSCP00000038674.1	2337	EQ,Nc,Sm,na	MAP4,microtubule-associated protein 4 isoform X6
hum:XP_006717159.1	2293	Susscr4EVm000168t2	2480	ncbi:XP_020953993.1	2389	ENSSSCP00000030534.2	2371	Ev,Nc,Sm,na	TNC,tenascin isoform X2
hum:NP_001243084.2	2290	Susscr4EVm000221t3	2603	ncbi:XP_020935471.1	2071	ENSSSCP00000046053.1	2071	Ev,Nc,Sm,Nclo,Smlo,	ARMCX4,armadillo repeat-containing X-linked protein 4
hum:NP_001333742.1	2289	Susscr4EVm000434t1	1962	ncbi:XP_020927545.1	1981	ENSSSCP00000042400.1	1831	Nc,Ev,Sm,na	ARID1B,AT-rich interactive domain-containing protein 1B isoform 3
hum:XP_011516641.1	2288	Susscr4EVm000209t34	2375	ncbi:XP_020945843.1	2306	ENSSSCP00000007345.3	2299	Ev,Nc,Sm,na	ABCA1,ATP-binding cassette sub-family A member 1 isoform X1
hum:NP_006006.3	2285	Susscr4EVm000084t35	2289	ncbi:XP_020951289.1	2289	ENSSSCP00000047116.1	2289	EQ,Nc,Sm,na	ARID1A,AT-rich interactive domain-containing protein 1A isoform a
hum:XP_005265126.1	2285	Susscr4EVm000283t10	2287	ncbi:XP_005652452.2	2278	ENSSSCP00000011990.3	2204	EQ,Nc,Sm,na	GOLGA4,golgin subfamily A member 4 isoform X1
hum:XP_005265127.1	2283	Susscr4EVm000283t1	2285	ncbi:XP_005652452.2	2285	ENSSSCP00000011990.3	2195	EQ,Nc,Sm,na	GOLGA4,golgin subfamily A member 4 isoform X2
hum:NP_055160.2	2279	Susscr4EVm000265t1	2309	ncbi:XP_001926827.1	2309	ENSSSCP00000001812.3	2309	EQ,Nc,Sm,na	ZNF318,zinc finger protein 318
hum:XP_011510725.1	2279	Susscr4EVm000179t10	2261	ncbi:XP_020926990.1	2260	ENSSSCP00000043192.1	1756	EQ,Nc,Sm,Smlo,	COL6A6,collagen alpha-6(VI) chain isoform X1
hum:XP_011526806.1	2276	Susscr4EVm000296t2	2271	ncbi:XP_020933883.1	2251	ENSSSCP00000052021.1	2177	Ev,Nc,Sm,na	DIDO1,death-inducer obliterator 1 isoform X1
hum:XP_016864941.1	2275	Susscr4EVm000207t2	2292	ncbi:XP_013840288.2	2278	ENSSSCP00000017965.3	2278	Ev,Nc,Sm,na	MAST4,microtubule-associated serine/threonine-protein kinase 4 isoform X10
hum:NP_000341.2	2273	Susscr4EVm000253t1	2297	ncbi:NP_001304009.1	2283	ENSSSCP00000005818.3	2284	Ev,Sm,Nc,na	ABCA4,retinal-specific ATP-binding cassette transporter
hum:NP_001008844.1	2272	Susscr4EVm000132t6	2286	ncbi:XP_020955817.1	2284	ENSSSCP00000059540.1	2005	EQ,Nc,Sm,Smlo,	DSP,desmoplakin isoform II
hum:NP_055640.2	2271	Susscr4EVm000217t14	2274	ncbi:XP_020925503.1	2301	ENSSSCP00000036505.1	2275	Nc,Sm,Ev,na	URB1,nucleolar pre-ribosomal-associated protein 1
hum:NP_000712.2	2270	Susscr4EVm000491t13	1764	ncbi:XP_020958273.1	2314	ENSSSCP00000038048.1	2401	Sm,Nc,Ev,Evlo,	CACNA1E,voltage-dependent R-type calcium channel subunit alpha-1E isoform 3
hum:NP_387505.1	2269	Susscr4EVm000261t8	2312	ncbi:XP_020926647.1	2200	ENSSSCP00000034395.1	2279	Ev,Sm,Nc,na	BRWD1,bromodomain and WD repeat-containing protein 1 isoform B
hum:NP_942135.1	2268	Susscr4EVm000080t4	2277	ncbi:NP_001193328.1	2271	ENSSSCP00000010604.3	2271	EQ,Nc,Sm,na	ACACA,acetyl-CoA carboxylase 1 isoform 4
hum:NP_000059.3	2266	Susscr4EVm000491t13	1877	ncbi:XP_020939369.1	2267	ENSSSCP00000033612.1	2268	EQ,Nc,Ev,Evlo,	CACNA1A,voltage-dependent P/Q-type calcium channel subunit alpha-1A isoform 1
hum:NP_056140.1	2266	Susscr4EVm000285t1	2285	ncbi:XP_020932784.1	2285	ENSSSCP00000037569.1	1480	EQ,Nc,Sm,Smfr,Smlo,	ICE1,little elongation complex subunit 1
hum:NP_938200.1	2266	Susscr4EVm000279t3	2295	ncbi:XP_020922827.1	2343	ENSSSCP00000018611.3	2288	Nc,Ev,Sm,na	CACNA1G,voltage-dependent T-type calcium channel subunit alpha-1G isoform 10
hum:XP_024308593.1	2259	Susscr4EVm000301t1	2215	ncbi:XP_020930417.1	2216	ENSSSCP00000056972.1	2103	EQ,Ev,Sm,na	BAZ2B,bromodomain adjacent to zinc finger domain protein 2B isoform X1
hum:XP_011543348.2	2258	Susscr4EVm000342t1	2137	ncbi:XP_020931812.1	2137	ENSSSCP00000016813.3	2137	EQ,Nc,Sm,na	MYO7A,unconventional myosin-VIIa isoform X1
hum:XP_016858390.1	2257	Susscr4EVm000197t2	2417	ncbi:XP_020946315.1	2419	ENSSSCP00000020330.2	2406	EQ,Ev,Sm,na	PDE4DIP,myomegalin isoform X34
hum:XP_005252627.1	2256	Susscr4EVm000271t16	2288	ncbi:XP_005668149.2	2266	ENSSSCP00000059351.1	2266	Ev,Nc,Sm,na	SVIL,supervillin isoform X7
hum:XP_016866596.1	2256	Susscr4EVm000434t10	1917	ncbi:XP_020927531.1	1994	ENSSSCP00000042400.1	1844	Nc,Ev,Sm,na	ARID1B,AT-rich interactive domain-containing protein 1B isoform X6
hum:XP_016873267.1	2256	Susscr4EVm000314t1	2148	ncbi:XP_020931812.1	2135	ENSSSCP00000016813.3	2135	Ev,Nc,Sm,na	MYO7A,unconventional myosin-VIIa isoform X2
hum:XP_005261472.1	2255	Susscr4EVm000299t1	2315	ncbi:XP_013838587.1	2268	ENSSSCP00000056440.1	2203	Ev,Nc,Sm,na	CABIN1,calcineurin-binding protein cabin-1 isoform X1
hum:NP_006062.1	2253	Susscr4EVm000430t1	1976	ncbi:XP_020948754.1	2147	ENSSSCP00000041796.1	2273	Sm,Nc,Ev,Evlo,	PKDREJ,polycystic kidney disease and receptor for egg jelly-related protein precursor
hum:XP_005265130.1	2252	Susscr4EVm000283t3	2287	ncbi:XP_005652452.2	2278	ENSSSCP00000011990.3	2225	EQ,Nc,Sm,na	GOLGA4,golgin subfamily A member 4 isoform X6
hum:XP_016867448.1	2251	Susscr4EVm000270t4	2266	ncbi:XP_013843143.2	2256	ENSSSCP00000008071.3	2254	Ev,Nc,Sm,na	INTS1,integrator complex subunit 1 isoform X1
hum:XP_005258413.1	2249	Susscr4EVm000404t1	2008	ncbi:XP_020951879.1	2015	ENSSSCP00000004043.3	2024	EQ,Nc,Ev,na	ASXL3,putative Polycomb group protein ASXL3 isoform X1
hum:NP_001316055.1	2248	Susscr4EVm000288t1	2269	ncbi:XP_003132466.2	2248	ENSSSCP00000048644.1	2248	Ev,Nc,Sm,na	DNAJC13,dnaJ homolog subfamily C member 13 isoform 1
hum:NP_060227.2	2248	Susscr4EVm000310t1	2255	ncbi:XP_020929439.1	2255	ENSSSCP00000047729.1	2255	EQ,Nc,Sm,na	ZNF407,zinc finger protein 407 isoform 1
hum:NP_001009899.3	2245	Susscr4EVm000294t1	2255	ncbi:XP_005670259.2	2255	ENSSSCP00000012699.3	2255	EQ,Nc,Sm,na	USF3,basic helix-loop-helix domain-containing protein USF3
hum:XP_011514994.1	2245	Susscr4EVm000356t1	1840	ncbi:XP_020934753.1	2139	ENSSSCP00000038364.1	1789	Nc,Ev,Sm,Evlo,Smlo,	MGAM2,putative maltase-glucoamylase-like protein FLJ16351 isoform X1
hum:XP_016859930.1	2245	Susscr4EVm000345t1	2198	ncbi:XP_020921482.1	2200	ENSSSCP00000054397.1	2169	EQ,Ev,Sm,na	DOCK10,dedicator of cytokinesis protein 10 isoform X1
hum:XP_016880750.1	2244	Susscr4EVm000025t10	2394	ncbi:XP_020919920.1	2617	ENSSSCP00000053326.1	2394	Nc,Ev,Sm,na	DNAH17,dynein heavy chain 17, axonemal isoform X4
hum:NP_056083.3	2243	Susscr4EVm000288t1	2264	ncbi:XP_020925116.1	2248	ENSSSCP00000048644.1	2248	Ev,Nc,Sm,na	DNAJC13,dnaJ homolog subfamily C member 13 isoform 2
hum:XP_005267482.1	2243	Susscr4EVm000269t1	2245	ncbi:XP_020955079.1	2246	ENSSSCP00000041338.1	2258	Sm,Nc,Ev,na	PCNX1,pecanex-like protein 1 isoform X6
hum:NP_001269785.1	2241	Susscr4EVm000284t16	2260	ncbi:XP_020945363.1	2247	ENSSSCP00000006938.3	2247	Ev,Nc,Sm,na	GON4L,GON-4-like protein isoform c
hum:XP_011536495.1	2239	Susscr4EVm000145t1	2074	ncbi:XP_020938932.1	2248	ENSSSCP00000024487.2	2248	EQ,Sm,Ev,na	OTOGL,otogelin-like protein isoform X4
hum:XP_011543407.1	2239	Susscr4EVm000551t5	1807	ncbi:XP_013834665.2	2254	ENSSSCP00000045051.1	1835	Nc,Sm,Ev,Smlo,Evlo,	SYTL2,synaptotagmin-like protein 2 isoform X1
hum:XP_016863501.1	2239	Susscr4EVm000155t26	2306	ncbi:NP_001190196.1	2275	ENSSSCP00000015281.3	2275	Ev,Nc,Sm,na	ANKRD17,ankyrin repeat domain-containing protein 17 isoform X3
hum:XP_016859931.1	2236	Susscr4EVm000307t1	2190	ncbi:XP_020921482.1	2200	ENSSSCP00000054397.1	2169	Nc,Ev,Sm,na	DOCK10,dedicator of cytokinesis protein 10 isoform X2
hum:NP_055495.2	2235	Susscr4EVm000295t1	2231	ncbi:XP_003131813.3	2214	ENSSSCP00000018823.3	2214	Ev,Nc,Sm,na	KIAA0100,protein KIAA0100 isoform 1 precursor
hum:XP_016859932.1	2232	Susscr4EVm000345t1	2232	ncbi:XP_020936143.1	2182	ENSSSCP00000013434.3	2182	Ev,Nc,Sm,na	DOCK10,dedicator of cytokinesis protein 10 isoform X3
hum:XP_006719591.1	2230	Susscr4EVm000309t1	2216	ncbi:XP_020947646.1	2216	ENSSSCP00000058445.1	2216	EQ,Nc,Sm,na	PTPRB,receptor-type tyrosine-protein phosphatase beta isoform X1
hum:XP_016859933.1	2230	Susscr4EVm000345t1	2196	ncbi:XP_013839998.1	2196	ENSSSCP00000054397.1	2169	EQ,Nc,Sm,na	DOCK10,dedicator of cytokinesis protein 10 isoform X4
hum:XP_024303907.1	2230	Susscr4EVm000271t2	2281	ncbi:XP_020920404.1	2266	ENSSSCP00000059351.1	2266	Ev,Nc,Sm,na	SVIL,supervillin isoform X2
hum:NP_037450.2	2229	Susscr4EVm000276t1	2247	ncbi:XP_020926066.1	2248	ENSSSCP00000046847.1	2247	EQ,Ev,Sm,na	PRRC2B,protein PRRC2B
hum:XP_016875323.1	2228	Susscr4EVm000239t17	2231	ncbi:XP_013853338.2	2198	ENSSSCP00000037720.1	1926	Ev,Nc,Sm,Smlo,	WNK1,serine/threonine-protein kinase WNK1 isoform X13
hum:XP_006722497.1	2227	Susscr4EVm000304t1	2233	ncbi:XP_020954904.1	2248	ENSSSCP00000052166.1	2233	Nc,Ev,Sm,na	RTTN,rotatin isoform X1
hum:XP_016870538.1	2227	Susscr4EVm000308t1	2239	ncbi:XP_020943808.1	2278	ENSSSCP00000032105.1	2240	Nc,Sm,Ev,na	WNK2,serine/threonine-protein kinase WNK2 isoform X13
hum:XP_016859934.1	2226	Susscr4EVm000345t1	2195	ncbi:XP_013840003.1	2171	ENSSSCP00000013434.3	2145	Ev,Nc,Sm,na	DOCK10,dedicator of cytokinesis protein 10 isoform X5
hum:NP_004332.2	2225	Susscr4EVm000280t4	2288	ncbi:XP_020943355.1	2225	ENSSSCP00000025052.2	2225	Ev,Nc,Sm,na	CAD,CAD protein isoform 1
hum:NP_000121.2	2224	Susscr4EVm000293t2	2282	ncbi:NP_999285.1	2282	ENSSSCP00000006704.2	2282	EQ,Nc,Sm,na	F5,coagulation factor V preproprotein
hum:XP_024303909.1	2224	Susscr4EVm000271t2	2281	ncbi:XP_005668149.2	2266	ENSSSCP00000059351.1	2266	Ev,Nc,Sm,na	SVIL,supervillin isoform X4
hum:NP_066919.2	2223	Susscr4EVm000279t11	1742	ncbi:XP_020948761.1	2191	ENSSSCP00000000087.3	2111	Nc,Sm,Ev,Evlo,	CACNA1I,voltage-dependent T-type calcium channel subunit alpha-1I isoform a
hum:NP_996879.1	2223	Susscr4EVm000300t1	2238	ncbi:XP_020945631.1	2237	ENSSSCP00000007173.3	2209	EQ,Nc,Sm,na	SPAG17,sperm-associated antigen 17
hum:XP_011536382.1	2222	Susscr4EVm000330t1	2303	ncbi:XP_020922959.1	2301	ENSSSCP00000018726.3	2301	EQ,Nc,Sm,na	MED13L,mediator of RNA polymerase II transcription subunit 13-like isoform X1
hum:NP_955630.3	2221	Susscr4EVm000316t1	2258	ncbi:XP_013837229.1	2234	ENSSSCP00000012208.3	2234	Ev,Nc,Sm,na	CACNA1C,voltage-dependent L-type calcium channel subunit alpha-1C isoform 1
hum:NP_006639.3	2217	Susscr4EVm000308t10	2247	ncbi:XP_020943812.1	2257	ENSSSCP00000032105.1	2247	Nc,Ev,Sm,na	WNK2,serine/threonine-protein kinase WNK2 isoform 2
hum:NP_001074003.1	2214	Susscr4EVm000949t1	1456	ncbi:XP_020950682.1	2227	ENSSSCP00000055975.1	2217	Nc,Sm,Ev,Evfr,Evlo,	UNC13C,protein unc-13 homolog C isoform 1
hum:NP_003096.1	2214	Susscr4EVm000305t1	2231	ncbi:XP_020918668.1	2216	ENSSSCP00000051195.1	2215	Ev,Nc,Sm,na	SORL1,sortilin-related receptor preproprotein
hum:NP_689957.3	2213	Susscr4EVm000332t2	2172	ncbi:XP_020922349.1	2099	ENSSSCP00000008091.3	1986	Ev,Nc,Sm,na	SDK1,protein sidekick-1 isoform 1
hum:NP_653213.6	2211	Susscr4EVm013716t1	241	ncbi:XP_020948244.1	2244	ENSSSCP00000022107.2	1772	Nc,Sm,Ev,Smlo,Evfr,Evlo,	LOXHD1,lipoxygenase homology domain-containing protein 1 isoform 1
hum:NP_055523.1	2209	Susscr4EVm000313t1	2207	ncbi:XP_020929741.1	2230	ENSSSCP00000046644.1	2230	EQ,Sm,Ev,na	KNTC1,kinetochore-associated protein 1
hum:XP_011544439.1	2209	Susscr4EVm000351t2	2211	ncbi:XP_020948172.1	2123	ENSSSCP00000034661.1	2101	Ev,Nc,Sm,na	MICAL3,F-actin-monooxygenase MICAL3 isoform X1
hum:XP_016875658.1	2208	Susscr4EVm000241t5	2254	ncbi:XP_020940962.1	2313	ENSSSCP00000014186.3	2295	Nc,Sm,Ev,na	NAV3,neuron navigator 3 isoform X9
hum:XP_011533696.1	2207	Susscr4EVm000315t1	2215	ncbi:XP_020946015.1	2208	ENSSSCP00000042651.1	2208	EQ,Nc,Sm,na	ASCC3,activating signal cointegrator 1 complex subunit 3 isoform X1
hum:XP_006712680.1	2206	Susscr4EVm000345t1	2208	ncbi:XP_013839994.1	2211	ENSSSCP00000054397.1	2207	EQ,Ev,Sm,na	DOCK10,dedicator of cytokinesis protein 10 isoform X6
hum:NP_001243262.1	2205	Susscr4EVm000260t23	2310	ncbi:XP_020922831.1	2343	ENSSSCP00000018611.3	2288	Nc,Ev,Sm,na	CACNA1G,voltage-dependent T-type calcium channel subunit alpha-1G isoform 25
hum:XP_011517237.1	2205	Susscr4EVm000308t10	2153	ncbi:XP_020943810.1	2163	ENSSSCP00000035939.1	2106	Nc,Ev,Sm,na	WNK2,serine/threonine-protein kinase WNK2 isoform X20
hum:NP_002151.2	2201	Susscr4EVm000168t1	2424	ncbi:XP_020953993.1	2281	ENSSSCP00000030534.2	2263	Ev,Nc,Sm,na	TNC,tenascin precursor
hum:XP_005246730.1	2199	Susscr4EVm000307t1	2199	ncbi:XP_013839998.1	2205	ENSSSCP00000054397.1	2164	EQ,Ev,Sm,na	DOCK10,dedicator of cytokinesis protein 10 isoform X7
hum:XP_016883107.1	2198	Susscr4EVm000181t2	2182	ncbi:XP_020933920.1	2163	ENSSSCP00000019167.2	2161	Ev,Nc,Sm,na	CEP250,centrosome-associated protein CEP250 isoform X9
hum:XP_016861165.1	2197	Susscr4EVm000339t1	2199	ncbi:XP_020925266.1	2199	ENSSSCP00000044257.1	2156	EQ,Nc,Sm,na	MED12L,mediator of RNA polymerase II transcription subunit 12-like protein isoform X1
hum:XP_011544441.1	2192	Susscr4EVm000351t2	2194	ncbi:XP_020948166.1	2159	ENSSSCP00000034661.1	2084	Ev,Nc,Sm,na	MICAL3,F-actin-monooxygenase MICAL3 isoform X2
hum:XP_011516710.1	2191	Susscr4EVm000177t1	2204	ncbi:XP_020926349.1	2214	ENSSSCP00000058630.1	2204	Nc,Ev,Sm,na	SETX,probable helicase senataxin isoform X4
hum:XP_011517238.1	2190	Susscr4EVm000308t13	2105	ncbi:XP_020943816.1	2115	ENSSSCP00000035939.1	2085	Nc,Ev,Sm,na	WNK2,serine/threonine-protein kinase WNK2 isoform X21
hum:XP_016869805.1	2188	Susscr4EVm000325t1	2194	ncbi:XP_020919173.1	2191	ENSSSCP00000055655.1	2191	EQ,Nc,Sm,na	FREM1,FRAS1-related extracellular matrix protein 1 isoform X1
hum:XP_016884362.1	2188	Susscr4EVm000351t1	2212	ncbi:XP_020948166.1	2212	ENSSSCP00000051490.1	2195	EQ,Nc,Sm,na	MICAL3,F-actin-monooxygenase MICAL3 isoform X4
hum:NP_001123299.1	2186	Susscr4EVm000297t6	2244	ncbi:XP_013837233.1	2229	ENSSSCP00000012208.3	2221	Ev,Nc,Sm,na	CACNA1C,voltage-dependent L-type calcium channel subunit alpha-1C isoform 2
hum:NP_055504.2	2186	Susscr4EVm000307t5	2225	ncbi:XP_003133735.3	2186	ENSSSCP00000027604.2	2186	Ev,Nc,Sm,na	DOCK10,dedicator of cytokinesis protein 10 DOCK10.1
hum:NP_001277192.1	2180	Susscr4EVm000307t5	2184	ncbi:XP_013840003.1	2180	ENSSSCP00000027604.2	2145	EQ,Nc,Sm,na	DOCK10,dedicator of cytokinesis protein 10 DOCK10.2
hum:XP_011509349.1	2179	Susscr4EVm000301t2	2155	ncbi:XP_020930417.1	2120	ENSSSCP00000056972.1	2112	Ev,Nc,Sm,na	BAZ2B,bromodomain adjacent to zinc finger domain protein 2B isoform X13
hum:NP_005111.2	2177	Susscr4EVm000339t1	2239	ncbi:XP_020925271.1	2250	ENSSSCP00000013191.3	2180	Nc,Ev,Sm,na	MED12,0
hum:NP_065073.3	2177	Susscr4EVm000328t1	2178	ncbi:XP_020943095.1	2178	ENSSSCP00000053057.1	2178	EQ,Nc,Sm,na	ARFGEF3,brefeldin A-inhibited guanine nucleotide-exchange protein 3
hum:NP_997639.1	2176	Susscr4EVm000220t13	2264	ncbi:XP_003133690.2	1992	ENSSSCP00000036609.1	1986	Ev,Nc,Sm,Nclo,Smlo,	FN1,fibronectin isoform 6 precursor
hum:XP_011517755.1	2176	Susscr4EVm000321t1	2187	ncbi:XP_020920623.1	2188	ENSSSCP00000041900.1	2160	EQ,Ev,Sm,na	MALRD1,MAM and LDL-receptor class A domain-containing protein 1 isoform X1
hum:XP_011521026.1	2176	Susscr4EVm000279t1	2226	ncbi:XP_020922836.1	2233	ENSSSCP00000035410.1	2205	EQ,Ev,Sm,na	CACNA1H,voltage-dependent T-type calcium channel subunit alpha-1H isoform X6
hum:NP_005112.2	2174	Susscr4EVm000297t1	2271	ncbi:XP_020928779.1	2273	ENSSSCP00000056699.1	2271	EQ,Ev,Sm,na	MED13,mediator of RNA polymerase II transcription subunit 13
hum:NP_001138424.1	2172	Susscr4EVm000332t2	2173	ncbi:XP_020943641.1	2129	ENSSSCP00000008091.3	1995	Ev,Nc,Sm,na	SDK2,protein sidekick-2 precursor
hum:XP_016873424.1	2171	Susscr4EVm000551t5	1785	ncbi:XP_013834670.2	2238	ENSSSCP00000045051.1	1785	Nc,Ev,Sm,Evlo,Smlo,	SYTL2,synaptotagmin-like protein 2 isoform X10
hum:NP_443179.3	2170	Susscr4EVm000336t1	2180	ncbi:XP_001926005.5	2180	ENSSSCP00000037672.1	2180	EQ,Nc,Sm,na	ALPK2,alpha-protein kinase 2
hum:XP_011525315.1	2169	Susscr4EVm000334t1	2175	ncbi:XP_003127422.3	2175	ENSSSCP00000024058.2	1197	EQ,Nc,Sm,Smfr,Smlo,	SHANK1,SH3 and multiple ankyrin repeat domains protein 1 isoform X1
hum:NP_001123303.1	2166	Susscr4EVm000297t6	2224	ncbi:XP_013837232.1	2210	ENSSSCP00000012208.3	2201	Ev,Nc,Sm,na	CACNA1C,voltage-dependent L-type calcium channel subunit alpha-1C isoform 5
hum:XP_016884818.1	2166	Susscr4EVm000074t1	2171	ncbi:XP_020927913.1	2171	ENSSSCP00000054678.1	2171	EQ,Nc,Sm,na	DMD,dystrophin isoform X10
hum:XP_011538506.1	2165	Susscr4EVm000333t1	2178	ncbi:NP_001302701.1	2178	ENSSSCP00000010918.3	2178	EQ,Nc,Sm,na	TET1,methylcytosine dioxygenase TET1 isoform X1
hum:XP_016859658.1	2164	Susscr4EVm000314t1	2260	ncbi:NP_001093398.1	2222	ENSSSCP00000015796.3	2223	Ev,Sm,Nc,na	MYO7B,unconventional myosin-VIIb isoform X1
hum:XP_016869210.1	2163	Susscr4EVm004925t1	694	ncbi:XP_020946014.1	1900	ENSSSCP00000009627.3	234	Nc,Ev,Sm,Evfr,Evlo,Smfr,Smlo,	RP1,oxygen-regulated protein 1 isoform X1
hum:XP_016870543.1	2163	Susscr4EVm000308t10	2191	ncbi:XP_020943819.1	2201	ENSSSCP00000035939.1	2144	Nc,Ev,Sm,na	WNK2,serine/threonine-protein kinase WNK2 isoform X23
hum:XP_024305390.1	2163	Susscr4EVm000303t4	2191	ncbi:XP_020957251.1	2177	ENSSSCP00000041848.1	2067	Ev,Nc,Sm,na	NIN,ninein isoform X1
hum:XP_011528855.1	2160	Susscr4EVm000139t2	2078	ncbi:XP_020926300.1	1870	ENSSSCP00000046462.1	2078	EQ,Sm,Nc,Nclo,	CELSR1,cadherin EGF LAG seven-pass G-type receptor 1 isoform X2
hum:XP_016884819.1	2160	Susscr4EVm000074t1	2171	ncbi:XP_020927911.1	2171	ENSSSCP00000054678.1	2169	EQ,Nc,Sm,na	DMD,dystrophin isoform X11
hum:NP_004136.2	2157	Susscr4EVm000302t2	2199	ncbi:XP_020939234.1	2168	ENSSSCP00000014746.3	2067	Ev,Nc,Sm,na	MYO9B,unconventional myosin-IXb isoform 1
hum:NP_004629.3	2157	Susscr4EVm000306t2	2169	ncbi:NP_001108147.1	2169	ENSSSCP00000001498.3	2170	EQ,Ev,Nc,na	PRRC2A,protein PRRC2A
hum:XP_011542830.1	2157	Susscr4EVm000312t2	2210	ncbi:XP_020933583.1	2199	ENSSSCP00000040634.1	2199	Ev,Nc,Sm,na	PCM1,pericentriolar material 1 protein isoform X1
hum:NP_005413.2	2155	Susscr4EVm000459t1	1950	ncbi:XP_013834938.1	2155	ENSSSCP00000023508.2	1757	Nc,Ev,Sm,Smlo,	TECTA,alpha-tectorin precursor
hum:NP_842565.2	2155	Susscr4EVm000250t11	2155	ncbi:XP_020943882.1	2148	ENSSSCP00000054202.1	2148	EQ,Nc,Sm,na	SPTBN1,spectrin beta chain, non-erythrocytic 1 isoform 2
hum:XP_011523216.1	2153	Susscr4EVm000332t2	2173	ncbi:XP_020943639.1	2126	ENSSSCP00000008091.3	1976	Ev,Nc,Sm,na	SDK2,protein sidekick-2 isoform X1
hum:NP_775837.2	2151	Susscr4EVm000349t1	2193	ncbi:XP_001925074.2	2174	ENSSSCP00000039045.1	2174	Ev,Nc,Sm,na	PRR14L,protein PRR14L
hum:XP_011540770.2	2151	Susscr4EVm000406t1	1999	ncbi:XP_003127691.2	1999	ENSSSCP00000003776.3	2012	Sm,Ev,Nc,na	CROCC,rootletin isoform X1
hum:XP_016867147.1	2151	Susscr4EVm000053t141	2134	ncbi:XP_020957838.1	2108	ENSSSCP00000016237.3	2082	Ev,Nc,Sm,na	AKAP9,A-kinase anchor protein 9 isoform X17
hum:XP_024307083.1	2151	Susscr4EVm000253t4	2238	ncbi:XP_013850261.1	2176	ENSSSCP00000007345.3	2180	Ev,Sm,Nc,na	ABCA7,ATP-binding cassette sub-family A member 7 isoform X1
hum:NP_062535.2	2146	Susscr4EVm000322t5	1527	ncbi:XP_001924746.3	526	ENSSSCP00000019331.2	1208	Ev,Sm,Nc,Smlo,Ncfr,Nclo,	YLPM1,YLP motif-containing protein 1
hum:XP_006716403.1	2146	Susscr4EVm000312t2	2199	ncbi:XP_020933569.1	2191	ENSSSCP00000040634.1	2188	EQ,Nc,Sm,na	PCM1,pericentriolar material 1 protein isoform X5
hum:NP_001297083.1	2144	Susscr4EVm000653t5	824	ncbi:XP_020933855.1	848	ENSSSCP00000033068.1	823	Nc,Ev,Sm,na	ANKRD36C,ankyrin repeat domain-containing protein 36C
hum:NP_060542.4	2144	Susscr4EVm000318t1	2144	ncbi:XP_020929416.1	2144	ENSSSCP00000046100.1	1874	EQ,Nc,Sm,Smlo,	HEATR1,HEAT repeat-containing protein 1
hum:XP_016859417.1	2144	Susscr4EVm000301t14	2151	ncbi:XP_020930417.1	2088	ENSSSCP00000056972.1	1976	Ev,Nc,Sm,na	BAZ2B,bromodomain adjacent to zinc finger domain protein 2B isoform X17
hum:XP_011516644.1	2142	Susscr4EVm000209t34	2229	ncbi:XP_020919556.1	2166	ENSSSCP00000007345.3	2150	Ev,Nc,Sm,na	ABCA1,ATP-binding cassette sub-family A member 1 isoform X6
hum:XP_011536916.1	2142	Susscr4EVm000309t4	1893	ncbi:XP_020947648.1	2128	ENSSSCP00000040609.1	2128	EQ,Sm,Ev,Evlo,	PTPRB,receptor-type tyrosine-protein phosphatase beta isoform X2
hum:XP_024307085.1	2142	Susscr4EVm000253t4	2246	ncbi:XP_020945843.1	2191	ENSSSCP00000007345.3	2183	Ev,Nc,Sm,na	ABCA7,ATP-binding cassette sub-family A member 7 isoform X2
hum:XP_006719985.1	2141	Susscr4EVm000307t1	2197	ncbi:XP_013839994.1	2202	ENSSSCP00000054397.1	2198	EQ,Sm,Ev,na	DOCK9,dedicator of cytokinesis protein 9 isoform X5
hum:XP_011540628.1	2140	Susscr4EVm000355t1	2182	ncbi:XP_003121977.3	2166	ENSSSCP00000005632.3	2166	Ev,Nc,Sm,na	DOCK7,dedicator of cytokinesis protein 7 isoform X1
hum:XP_016875992.1	2140	Susscr4EVm000307t10	2164	ncbi:XP_013840002.1	2169	ENSSSCP00000054397.1	2142	EQ,Ev,Sm,na	DOCK9,dedicator of cytokinesis protein 9 isoform X1
hum:NP_001161707.1	2139	Susscr4EVm000091t1	2119	ncbi:XP_020957210.1	2143	ENSSSCP00000009994.3	2119	Nc,Ev,Sm,na	FREM3,FRAS1-related extracellular matrix protein 3 precursor
hum:NP_001342366.1	2137	Susscr4EVm000250t10	2156	ncbi:XP_020950053.1	2131	ENSSSCP00000031537.1	2131	Ev,Nc,Sm,na	SPTB,spectrin beta chain, erythrocytic isoform b
hum:NP_055616.3	2137	Susscr4EVm000391t1	2054	ncbi:XP_020929951.1	1940	ENSSSCP00000043714.1	2141	Sm,Ev,Nc,na	PCNX2,pecanex-like protein 2 isoform 1
hum:NP_054733.2	2136	Susscr4EVm000344t1	2136	ncbi:XP_020942757.1	2136	ENSSSCP00000051899.1	2136	EQ,Nc,Sm,na	SNRNP200,U5 small nuclear ribonucleoprotein 200 kDa helicase
hum:XP_011532135.1	2136	Susscr4EVm000327t1	2182	ncbi:XP_020926283.1	2137	ENSSSCP00000012099.3	2136	Ev,Nc,Sm,na	PLXNB1,plexin-B1 isoform X1
hum:NP_065972.3	2133	Susscr4EVm000303t3	2167	ncbi:XP_020957251.1	2177	ENSSSCP00000041848.1	2068	Nc,Ev,Sm,na	NIN,ninein isoform 2
hum:XP_005264641.1	2133	Susscr4EVm000326t2	2175	ncbi:XP_020944057.1	2272	ENSSSCP00000052034.1	2163	Nc,Ev,Sm,na	DYSF,dysferlin isoform X1
hum:XP_011543356.1	2133	Susscr4EVm000266t11	2211	ncbi:XP_005653721.1	2144	ENSSSCP00000057863.1	2144	Ev,Nc,Sm,na	NUMA1,nuclear mitotic apparatus protein 1 isoform X1
hum:XP_024303160.1	2133	Susscr4EVm000248t11	2264	ncbi:XP_020937574.1	2196	ENSSSCP00000048258.1	2190	Ev,Nc,Sm,na	CNTRL,centriolin isoform X5
hum:NP_001333176.1	2131	Susscr4EVm000208t5	2132	ncbi:XP_020954818.1	2132	ENSSSCP00000042607.1	2082	EQ,Nc,Sm,na	RALGAPA1,ral GTPase-activating protein subunit alpha-1 isoform 7
hum:XP_005266896.1	2131	Susscr4EVm000366t1	2140	ncbi:XP_020946164.1	2140	ENSSSCP00000029755.2	2140	EQ,Nc,Sm,na	CRYBG1,beta/gamma crystallin domain-containing protein 1 isoform X1
hum:XP_005267549.1	2130	Susscr4EVm000208t6	2132	ncbi:XP_020954818.1	2132	ENSSSCP00000042607.1	2082	EQ,Nc,Sm,na	RALGAPA1,ral GTPase-activating protein subunit alpha-1 isoform X6
hum:XP_006719987.1	2130	Susscr4EVm000307t5	2182	ncbi:XP_013840000.1	2186	ENSSSCP00000027604.2	2181	EQ,Ev,Sm,na	DOCK9,dedicator of cytokinesis protein 9 isoform X8
hum:XP_016882540.1	2129	Susscr4EVm000006t315	2122	ncbi:XP_020938429.1	2117	ENSSSCP00000005106.2	2150	Sm,Ev,Nc,na	SPTBN4,spectrin beta chain, non-erythrocytic 4 isoform X4
hum:NP_001123318.1	2127	Susscr4EVm000297t6	2186	ncbi:XP_013837229.1	2211	ENSSSCP00000012208.3	2211	EQ,Sm,Ev,na	CACNA1C,voltage-dependent L-type calcium channel subunit alpha-1C isoform 20
hum:XP_016867149.1	2122	Susscr4EVm000053t141	2131	ncbi:XP_020957837.1	2112	ENSSSCP00000016237.3	2092	Ev,Nc,Sm,na	AKAP9,A-kinase anchor protein 9 isoform X19
hum:NP_036423.4	2120	Susscr4EVm000214t1	2129	ncbi:XP_013841684.2	2129	ENSSSCP00000000280.3	2120	EQ,Nc,Sm,na	ESPL1,separin
hum:XP_011522220.1	2117	Susscr4EVm000342t5	965	ncbi:XP_020923655.1	2146	ENSSSCP00000044826.1	2125	Nc,Sm,Ev,Evfr,Evlo,	MYO15A,unconventional myosin-XV isoform X2
hum:XP_005256484.1	2115	Susscr4EVm000347t5	2143	ncbi:XP_020923494.1	2051	ENSSSCP00000055885.1	1916	Ev,Nc,Sm,Smlo,	CHD3,chromodomain-helicase-DNA-binding protein 3 isoform X1
hum:XP_016876001.1	2115	Susscr4EVm000345t1	2148	ncbi:XP_020921478.1	2133	ENSSSCP00000039278.1	2130	Ev,Nc,Sm,na	DOCK9,dedicator of cytokinesis protein 9 isoform X13
hum:NP_065744.2	2113	Susscr4EVm000553t1	1788	ncbi:XP_020918560.1	2113	ENSSSCP00000012852.3	1964	Nc,Sm,Ev,Evlo,	DSCAML1,Down syndrome cell adhesion molecule-like protein 1
hum:XP_005260057.1	2113	Susscr4EVm000282t4	2165	ncbi:XP_003121977.3	2148	ENSSSCP00000004130.3	2143	Ev,Nc,Sm,na	DOCK6,dedicator of cytokinesis protein 6 isoform X6
hum:XP_016871417.1	2112	Susscr4EVm000653t3	1677	ncbi:XP_020920528.1	1672	ENSSSCP00000033068.1	1672	EQ,Nc,Sm,na	ANKRD26,ankyrin repeat domain-containing protein 26 isoform X1
hum:XP_024309224.1	2111	Susscr4EVm000283t110	2115	ncbi:XP_005652452.2	2104	ENSSSCP00000011990.3	2113	EQ,Sm,Nc,na	GOLGA4,golgin subfamily A member 4 isoform X13
hum:XP_005249549.1	2110	Susscr4EVm000359t1	2161	ncbi:XP_013833041.1	2133	ENSSSCP00000029389.2	2130	Ev,Nc,Sm,na	MDC1,mediator of DNA damage checkpoint protein 1 isoform X1
hum:XP_011509080.1	2110	Susscr4EVm000357t1	2110	ncbi:XP_013839888.1	2110	ENSSSCP00000054023.1	2110	EQ,Nc,Sm,na	PIKFYVE,1-phosphatidylinositol 3-phosphate 5-kinase isoform X1
hum:NP_001511.2	2109	Susscr4EVm000335t4	2173	ncbi:XP_005662121.1	2124	ENSSSCP00000008344.2	2124	Ev,Nc,Sm,na	GTF3C1,general transcription factor 3C polypeptide 1 isoform 1
hum:NP_212132.2	2109	Susscr4EVm000282t4	2168	ncbi:XP_020952203.1	2152	ENSSSCP00000004130.3	2152	Ev,Nc,Sm,na	DOCK7,dedicator of cytokinesis protein 7 isoform 2
hum:NP_001278340.1	2108	Susscr4EVm000245t12	1935	ncbi:XP_003358980.1	1925	ENSSSCP00000048634.1	1925	Ev,Nc,Sm,na	SON,protein SON isoform E
hum:NP_060482.2	2108	Susscr4EVm000346t6	2130	ncbi:XP_020920125.1	2120	ENSSSCP00000026280.2	2120	Ev,Nc,Sm,na	KIF26B,kinesin-like protein KIF26B
hum:XP_016884318.1	2108	Susscr4EVm000317t10	2073	ncbi:XP_001929604.6	2073	ENSSSCP00000045782.1	2102	Sm,Ev,Nc,na	PI4KA,phosphatidylinositol 4-kinase alpha isoform X1
hum:XP_006719994.1	2107	Susscr4EVm000345t1	2182	ncbi:XP_013840000.1	2180	ENSSSCP00000027604.2	2175	EQ,Nc,Sm,na	DOCK9,dedicator of cytokinesis protein 9 isoform X15
hum:XP_016858128.1	2107	Susscr4EVm000324t4	2167	ncbi:XP_020952203.1	2152	ENSSSCP00000004130.3	2152	Ev,Nc,Sm,na	DOCK7,dedicator of cytokinesis protein 7 isoform X4
hum:NP_060862.3	2104	Susscr4EVm000550t1	1800	ncbi:XP_020957320.1	2112	ENSSSCP00000049859.1	1931	Nc,Sm,Ev,Evlo,	ZGRF1,protein ZGRF1 isoform 1
hum:XP_011535412.1	2104	Susscr4EVm000178t5	2160	ncbi:XP_005656370.2	2110	ENSSSCP00000002341.3	2110	Ev,Nc,Sm,na	TEP1,telomerase protein component 1 isoform X2
hum:XP_016876003.1	2104	Susscr4EVm000307t5	2138	ncbi:XP_013839994.1	2142	ENSSSCP00000054397.1	2138	EQ,Ev,Sm,na	DOCK9,dedicator of cytokinesis protein 9 isoform X17
hum:XP_024309055.1	2104	Susscr4EVm000067t4	2009	ncbi:XP_020918993.1	2108	ENSSSCP00000031779.1	2007	Nc,Ev,Sm,na	CR1,complement receptor type 1 isoform X3
hum:NP_001017969.2	2103	Susscr4EVm000360t10	2120	ncbi:XP_003121963.3	2113	ENSSSCP00000005595.3	2113	EQ,Nc,Sm,na	KIAA2026,uncharacterized protein KIAA2026
hum:XP_016861169.1	2103	Susscr4EVm000339t1	2164	ncbi:XP_020925272.1	2164	ENSSSCP00000032547.1	2083	EQ,Nc,Sm,na	MED12L,mediator of RNA polymerase II transcription subunit 12-like protein isoform X7
hum:NP_001124455.1	2102	Susscr4EVm000326t2	2159	ncbi:XP_013851496.2	2135	ENSSSCP00000052034.1	2133	Ev,Nc,Sm,na	DYSF,dysferlin isoform 6
hum:XP_005271793.2	2101	Susscr4EVm000377t4	2082	ncbi:XP_013835017.2	2106	ENSSSCP00000059289.1	2106	EQ,Sm,Ev,na	ARHGAP32,rho GTPase-activating protein 32 isoform X1
hum:XP_024306548.1	2098	Susscr4EVm000187t13	878	ncbi:XP_020923655.1	2102	ENSSSCP00000044826.1	2081	Nc,Sm,Ev,Evfr,Evlo,	MYO15A,unconventional myosin-XV isoform X3
hum:XP_011512437.1	2097	Susscr4EVm000558t1	1799	ncbi:NP_001038026.1	1799	ENSSSCP00000017830.3	1799	EQ,Nc,Sm,na	SPEF2,sperm flagellar protein 2 isoform X1
hum:NP_001010870.1	2096	Susscr4EVm001101t1	1331	ncbi:XP_001928203.2	2096	ENSSSCP00000020457.2	2096	EQ,Sm,Ev,Evfr,Evlo,	TDRD6,tudor domain-containing protein 6 isoform 1
hum:XP_011535125.1	2096	Susscr4EVm000303t24	2090	ncbi:XP_020957251.1	2075	ENSSSCP00000041848.1	2000	Ev,Nc,Sm,na	NIN,ninein isoform X4
hum:XP_011512729.1	2095	Susscr4EVm000191t29	2105	ncbi:XP_020954395.1	2131	ENSSSCP00000048218.1	2091	Nc,Ev,Sm,na	CUL9,cullin-9 isoform X5
hum:XP_016868961.1	2094	Susscr4EVm000312t1	2135	ncbi:XP_020933569.1	2135	ENSSSCP00000040634.1	2135	EQ,Nc,Sm,na	PCM1,pericentriolar material 1 protein isoform X6
hum:XP_016876005.1	2092	Susscr4EVm000307t5	2126	ncbi:XP_020921478.1	2133	ENSSSCP00000054397.1	2128	EQ,Sm,Ev,na	DOCK9,dedicator of cytokinesis protein 9 isoform X21
hum:XP_024308991.1	2092	Susscr4EVm000373t1	2111	ncbi:XP_020930716.1	2101	ENSSSCP00000043541.1	2098	Ev,Nc,Sm,na	TRIP12,E3 ubiquitin-protein ligase TRIP12 isoform X1
hum:NP_005076.3	2090	Susscr4EVm000323t1	2135	ncbi:XP_005660586.1	2077	ENSSSCP00000006118.2	2077	Ev,Nc,Sm,na	NUP214,nuclear pore complex protein Nup214 isoform 2
hum:XP_011540772.2	2090	Susscr4EVm000406t2	1942	ncbi:XP_003127691.2	1914	ENSSSCP00000003776.3	1927	Ev,Sm,Nc,na	CROCC,rootletin isoform X4
hum:NP_055456.2	2089	Susscr4EVm000359t1	2159	ncbi:XP_013833040.1	2131	ENSSSCP00000029389.2	2130	Ev,Nc,Sm,na	MDC1,mediator of DNA damage checkpoint protein 1
hum:XP_016883228.1	2087	Susscr4EVm000368t7	1099	ncbi:XP_020933958.1	1196	ENSSSCP00000037766.1	1023	Nc,Ev,Sm,Smlo,	NCOA6,nuclear receptor coactivator 6 isoform X1
hum:XP_005262425.1	2086	Susscr4EVm000307t19	2169	ncbi:XP_013840000.1	2171	ENSSSCP00000027604.2	2164	EQ,Ev,Sm,na	DOCK11,dedicator of cytokinesis protein 11 isoform X1
hum:XP_016866763.1	2086	Susscr4EVm000306t18	2012	ncbi:NP_001108147.1	2010	ENSSSCP00000001498.3	2011	EQ,Sm,Nc,na	PRRC2A,protein PRRC2A isoform X1
hum:XP_011536085.1	2084	Susscr4EVm000370t3	2084	ncbi:XP_020929199.1	2084	ENSSSCP00000010502.3	2084	EQ,Nc,Sm,na	CIT,citron Rho-interacting kinase isoform X1
hum:XP_016859298.1	2084	Susscr4EVm000369t1	2090	ncbi:XP_020943041.1	2097	ENSSSCP00000019384.2	2085	EQ,Ev,Sm,na	ZNF638,zinc finger protein 638 isoform X1
hum:NP_001269973.1	2083	Susscr4EVm000208t5	2082	ncbi:XP_020954820.1	2084	ENSSSCP00000042607.1	2084	EQ,Sm,Ev,na	RALGAPA1,ral GTPase-activating protein subunit alpha-1 isoform 4
hum:XP_011536086.1	2083	Susscr4EVm000370t3	2084	ncbi:XP_020929200.1	2084	ENSSSCP00000010502.3	2084	EQ,Nc,Sm,na	CIT,citron Rho-interacting kinase isoform X2
hum:XP_006719475.1	2082	Susscr4EVm000465t1	1591	ncbi:XP_020947460.1	687	ENSSSCP00000025395.2	250	Ev,Nc,Sm,Ncfr,Nclo,Smfr,Smlo,	NACA,nascent polypeptide-associated complex subunit alpha isoform X1
hum:NP_001123927.1	2081	Susscr4EVm000343t3	2152	ncbi:XP_020929511.1	2132	ENSSSCP00000052034.1	2132	Ev,Nc,Sm,na	DYSF,dysferlin isoform 2
hum:XP_016883947.1	2081	Susscr4EVm000375t4	2045	ncbi:XP_020926628.1	2038	ENSSSCP00000057491.1	1951	EQ,Nc,Sm,na	TTC3,E3 ubiquitin-protein ligase TTC3 isoform X1
hum:NP_208384.3	2080	Susscr4EVm000437t3	414	ncbi:XP_003127524.2	1624	ENSSSCP00000003585.3	2054	Sm,Nc,Ev,Nclo,Evfr,Evlo,	HELZ2,helicase with zinc finger domain 2 isoform 2
hum:XP_005269750.1	2080	Susscr4EVm000343t2	2178	ncbi:XP_013851496.2	2161	ENSSSCP00000008874.3	2130	Ev,Nc,Sm,na	MYOF,myoferlin isoform X1
hum:XP_006724878.1	2080	Susscr4EVm000337t27	2167	ncbi:XP_003135533.2	2103	ENSSSCP00000013602.3	2090	Ev,Nc,Sm,na	HCFC1,host cell factor 1 isoform X1
hum:XP_006724879.1	2079	Susscr4EVm000337t21	2167	ncbi:XP_003135533.2	1522	ENSSSCP00000013602.3	2089	Ev,Sm,Nc,Nclo,	HCFC1,host cell factor 1 isoform X2
hum:NP_060506.5	2078	Susscr4EVm000435t2	2148	ncbi:XP_020933199.1	2116	ENSSSCP00000020591.2	2108	Ev,Nc,Sm,na	ATG2B,autophagy-related protein 2 homolog B
hum:XP_011522899.1	2075	Susscr4EVm000401t1	2075	ncbi:XP_020923779.1	2075	ENSSSCP00000044111.1	2075	EQ,Nc,Sm,na	TANC2,protein TANC2 isoform X1
hum:NP_036462.2	2073	Susscr4EVm000376t2	2092	ncbi:XP_001928984.1	2075	ENSSSCP00000032086.1	2075	Ev,Nc,Sm,na	KAT6B,histone acetyltransferase KAT6B isoform 1
hum:XP_005251442.1	2073	Susscr4EVm000360t6	2126	ncbi:XP_020919571.1	2120	ENSSSCP00000042660.1	2120	EQ,Nc,Sm,na	KIAA2026,uncharacterized protein KIAA2026 isoform X1
hum:NP_061897.1	2071	Susscr4EVm000367t1	2127	ncbi:XP_020955553.1	2084	ENSSSCP00000002151.3	2084	Ev,Nc,Sm,na	HEATR5B,HEAT repeat-containing protein 5B
hum:XP_005264971.1	2071	Susscr4EVm000382t2	2081	ncbi:XP_020924490.1	2077	ENSSSCP00000044545.1	2071	EQ,Nc,Sm,na	DOCK3,dedicator of cytokinesis protein 3 isoform X1
hum:NP_001317566.1	2070	Susscr4EVm000362t1	2102	ncbi:XP_020919362.1	2136	ENSSSCP00000005581.3	2102	Nc,Ev,Sm,na	MPDZ,multiple PDZ domain protein isoform 4
hum:XP_011536087.1	2069	Susscr4EVm000370t3	2084	ncbi:XP_020929202.1	2084	ENSSSCP00000010502.3	2069	EQ,Nc,Sm,na	CIT,citron Rho-interacting kinase isoform X3
hum:NP_001292204.1	2068	Susscr4EVm000363t21	2119	ncbi:XP_020950836.1	2047	ENSSSCP00000058644.1	2137	Sm,Ev,Nc,na	AGRN,agrin isoform 1 precursor
hum:NP_001335257.1	2068	Susscr4EVm000373t1	2082	ncbi:XP_020930749.1	2075	ENSSSCP00000043541.1	2069	EQ,Nc,Sm,na	TRIP12,E3 ubiquitin-protein ligase TRIP12 isoform i
hum:XP_005245341.1	2068	Susscr4EVm000284t1	2073	ncbi:XP_020945357.1	2073	ENSSSCP00000020016.2	2073	EQ,Nc,Sm,na	GON4L,GON-4-like protein isoform X3
hum:NP_001124458.1	2067	Susscr4EVm000326t2	2142	ncbi:XP_020929511.1	2132	ENSSSCP00000052034.1	2132	Ev,Nc,Sm,na	DYSF,dysferlin isoform 3
hum:XP_005269751.1	2067	Susscr4EVm000343t4	2171	ncbi:XP_013851496.2	2159	ENSSSCP00000008874.3	2128	Ev,Nc,Sm,na	MYOF,myoferlin isoform X2
hum:XP_011523944.1	2067	Susscr4EVm000415t1	1981	ncbi:XP_020951796.1	1981	ENSSSCP00000019283.2	1981	EQ,Nc,Sm,na	SMCHD1,structural maintenance of chromosomes flexible hinge domain-containing protein 1 isoform X1
hum:XP_016881037.1	2067	Susscr4EVm013716t1	241	ncbi:XP_020948242.1	1943	ENSSSCP00000022107.2	2069	Sm,Nc,Ev,Evfr,Evlo,	LOXHD1,lipoxygenase homology domain-containing protein 1 isoform X10
hum:XP_011510412.1	2066	Susscr4EVm000343t6	2135	ncbi:XP_020929511.1	2112	ENSSSCP00000008874.3	2116	Ev,Sm,Nc,na	FER1L5,fer-1-like protein 5 isoform X1
hum:XP_011541219.1	2065	Susscr4EVm000553t1	1800	ncbi:XP_020927156.1	2067	ENSSSCP00000012852.3	1976	Nc,Sm,Ev,Evlo,	DSCAML1,Down syndrome cell adhesion molecule-like protein 1 isoform X1
hum:NP_055601.2	2063	Susscr4EVm000384t1	2068	ncbi:XP_003357240.3	2068	ENSSSCP00000015741.3	2068	EQ,Nc,Sm,na	ARHGEF17,rho guanine nucleotide exchange factor 17
hum:XP_024309785.1	2063	Susscr4EVm000050t9	2063	ncbi:XP_020933972.1	1603	ENSSSCP00000042184.1	1931	Ev,Sm,Nc,Nclo,	ANK2,ankyrin-2 isoform X12
hum:NP_056023.3	2062	Susscr4EVm000380t26	2088	ncbi:XP_020951722.1	2065	ENSSSCP00000003988.3	2065	Ev,Nc,Sm,na	ANKRD12,ankyrin repeat domain-containing protein 12 isoform 1
hum:XP_005256486.1	2060	Susscr4EVm000347t43	2107	ncbi:XP_020923495.1	2061	ENSSSCP00000031667.1	1969	Ev,Nc,Sm,na	CHD3,chromodomain-helicase-DNA-binding protein 3 isoform X7
hum:XP_011522901.1	2059	Susscr4EVm000401t1	2053	ncbi:XP_020923784.1	2059	ENSSSCP00000044111.1	2053	EQ,Ev,Sm,na	TANC2,protein TANC2 isoform X5
hum:NP_001333694.1	2058	Susscr4EVm000236t7	2073	ncbi:NP_001116613.1	1678	ENSSSCP00000036664.1	1699	Ev,Sm,Nc,Smlo,Nclo,	MYO18A,unconventional myosin-XVIIIa isoform c
hum:NP_036466.2	2058	Susscr4EVm000389t1	2050	ncbi:XP_005672454.2	2050	ENSSSCP00000017789.3	2050	EQ,Nc,Sm,na	MYO10,unconventional myosin-X
hum:XP_011526454.1	2058	Susscr4EVm000353t9	2170	ncbi:XP_020921477.1	2170	ENSSSCP00000039206.1	2155	EQ,Nc,Sm,na	DOCK6,dedicator of cytokinesis protein 6 isoform X4
hum:XP_005264974.1	2057	Susscr4EVm000382t1	2071	ncbi:XP_020924490.1	2077	ENSSSCP00000044545.1	2071	EQ,Ev,Sm,na	DOCK3,dedicator of cytokinesis protein 3 isoform X4
hum:XP_016884368.1	2057	Susscr4EVm000351t16	2087	ncbi:XP_020948172.1	1737	ENSSSCP00000034661.1	1715	Ev,Nc,Sm,Nclo,Smlo,	MICAL3,F-actin-monooxygenase MICAL3 isoform X11
hum:XP_011528331.1	2056	Susscr4EVm000299t17	2063	ncbi:XP_013838587.1	2053	ENSSSCP00000037663.1	2040	Ev,Nc,Sm,na	CABIN1,calcineurin-binding protein cabin-1 isoform X14
hum:NP_001307676.1	2055	Susscr4EVm000396t1	2055	ncbi:XP_003131232.4	2055	ENSSSCP00000018215.3	1842	EQ,Nc,Sm,Smlo,	EVPL,envoplakin isoform 1
hum:NP_510880.2	2054	Susscr4EVm000236t28	2061	ncbi:XP_020947197.1	1793	ENSSSCP00000000149.3	1783	Ev,Nc,Sm,Nclo,Smlo,	MYO18A,unconventional myosin-XVIIIa isoform a
hum:XP_011535336.1	2053	Susscr4EVm000390t1	2067	ncbi:XP_003480507.1	2066	ENSSSCP00000005378.3	2066	EQ,Nc,Sm,na	FANCM,Fanconi anemia group M protein isoform X1
hum:XP_016869815.1	2052	Susscr4EVm000325t3	2094	ncbi:XP_020919173.1	2052	ENSSSCP00000055655.1	2052	Ev,Nc,Sm,na	FREM1,FRAS1-related extracellular matrix protein 1 isoform X5
hum:XP_005244806.1	2049	Susscr4EVm000363t21	2100	ncbi:XP_020950837.1	2047	ENSSSCP00000058644.1	2118	Sm,Ev,Nc,na	AGRN,agrin isoform X1
hum:XP_011509087.1	2048	Susscr4EVm000357t1	2050	ncbi:XP_013839893.1	2054	ENSSSCP00000052183.1	2054	EQ,Sm,Ev,na	PIKFYVE,1-phosphatidylinositol 3-phosphate 5-kinase isoform X8
hum:XP_011533950.1	2048	Susscr4EVm000371t1	2055	ncbi:XP_020944947.1	2047	ENSSSCP00000051752.1	2047	EQ,Nc,Sm,na	PHF3,PHD finger protein 3 isoform X1
hum:XP_011542958.1	2048	Susscr4EVm000376t1	1955	ncbi:XP_001928984.1	1943	ENSSSCP00000056682.1	2052	Sm,Ev,Nc,na	KAT6A,histone acetyltransferase KAT6A isoform X1
hum:NP_065863.2	2047	Susscr4EVm000345t1	2170	ncbi:XP_020952206.1	2127	ENSSSCP00000031616.1	2127	Ev,Nc,Sm,na	DOCK6,dedicator of cytokinesis protein 6
hum:XP_011543326.1	2047	Susscr4EVm000374t1	2086	ncbi:XP_020938486.1	2076	ENSSSCP00000013807.3	2050	Ev,Nc,Sm,na	PCNX3,pecanex-like protein 3 isoform X1
hum:XP_016868969.1	2047	Susscr4EVm000312t5	2128	ncbi:XP_020933583.1	2128	ENSSSCP00000040634.1	2127	EQ,Nc,Sm,na	PCM1,pericentriolar material 1 protein isoform X10
hum:NP_056288.2	2046	Susscr4EVm000367t1	2094	ncbi:XP_003481294.1	2082	ENSSSCP00000002151.3	2051	Ev,Nc,Sm,na	HEATR5A,HEAT repeat-containing protein 5A
hum:XP_011525622.1	2043	Susscr4EVm000372t33	2000	ncbi:XP_020950440.1	2069	ENSSSCP00000028051.2	1979	Nc,Ev,Sm,na	MYH14,myosin-14 isoform X1
hum:XP_011540976.1	2042	Susscr4EVm001047t1	1465	ncbi:XP_020918558.1	1508	ENSSSCP00000016003.3	1460	Nc,Ev,Sm,na	CEP164,centrosomal protein of 164 kDa isoform X1
hum:XP_016876615.1	2042	Susscr4EVm000200t20	2059	ncbi:XP_020955055.1	2044	ENSSSCP00000002495.3	2044	Ev,Nc,Sm,na	ZFYVE26,zinc finger FYVE domain-containing protein 26 isoform X3
hum:NP_005568.2	2040	Susscr4EVm003236t8	832	ncbi:NP_001038055.1	810	ENSSSCP00000004364.3	810	Ev,Nc,Sm,na	LPA,apolipoprotein(a) precursor
hum:NP_001077094.1	2039	Susscr4EVm000380t1	2087	ncbi:XP_020951722.1	2065	ENSSSCP00000003988.3	2065	Ev,Nc,Sm,na	ANKRD12,ankyrin repeat domain-containing protein 12 isoform 2
hum:XP_011522177.1	2037	Susscr4EVm000372t27	2051	ncbi:XP_020923522.1	2038	ENSSSCP00000000149.3	1996	Ev,Nc,Sm,na	MYH10,myosin-10 isoform X7
hum:NP_001139281.1	2036	Susscr4EVm000372t33	2033	ncbi:XP_020925485.1	2015	ENSSSCP00000028051.2	2012	Ev,Nc,Sm,na	MYH14,myosin-14 isoform 3
hum:NP_065770.1	2036	Susscr4EVm000386t21	1478	ncbi:XP_003127395.3	1448	ENSSSCP00000056363.1	1125	Ev,Nc,Sm,Smlo,	PRR12,proline-rich protein 12
hum:XP_016884371.1	2036	Susscr4EVm000351t17	2088	ncbi:XP_020948179.1	2088	ENSSSCP00000036640.1	2066	EQ,Nc,Sm,na	MICAL3,F-actin-monooxygenase MICAL3 isoform X12
hum:NP_001008938.1	2032	Susscr4EVm000394t1	2036	ncbi:XP_013849816.2	2033	ENSSSCP00000044234.1	2076	Sm,Ev,Nc,na	CKAP5,cytoskeleton-associated protein 5 isoform a
hum:NP_001073883.2	2028	Susscr4EVm000388t1	2134	ncbi:XP_020955742.1	1939	ENSSSCP00000002641.3	1930	Ev,Nc,Sm,na	CCDC88C,protein Daple
hum:XP_016858403.2	2026	Susscr4EVm000406t4	1927	ncbi:XP_003127691.2	1800	ENSSSCP00000003776.3	1813	Ev,Sm,Nc,na	CROCC,rootletin isoform X5
hum:XP_016859965.1	2026	Susscr4EVm000414t1	2060	ncbi:XP_020955742.1	1976	ENSSSCP00000002641.3	1966	Ev,Nc,Sm,na	CCDC88A,girdin isoform X2
hum:NP_060132.3	2022	Susscr4EVm000393t1	2009	ncbi:XP_020920634.1	2012	ENSSSCP00000041332.1	1691	EQ,Ev,Sm,Smlo,	TRPM6,transient receptor potential cation channel subfamily M member 6 isoform a
hum:XP_016870170.1	2020	Susscr4EVm000168t6	2050	ncbi:XP_020953993.1	2036	ENSSSCP00000030534.2	2027	Ev,Nc,Sm,na	TNC,tenascin isoform X7
hum:XP_011530396.1	2018	Susscr4EVm000550t1	1851	ncbi:XP_020957323.1	2032	ENSSSCP00000035659.1	1851	Nc,Ev,Sm,na	ZGRF1,protein ZGRF1 isoform X5
hum:NP_001073867.1	2017	Susscr4EVm000507t1	1857	ncbi:XP_020923120.1	1848	ENSSSCP00000046478.1	1848	EQ,Nc,Sm,na	KIAA0368,proteasome-associated protein ECM29 homolog
hum:XP_011517854.2	2017	Susscr4EVm000445t1	1956	ncbi:XP_020919888.1	1956	ENSSSCP00000011811.3	1844	EQ,Nc,Sm,na	KIAA1217,sickle tail protein homolog isoform X1
hum:NP_001092874.1	2016	Susscr4EVm000402t12	2075	ncbi:XP_003133492.1	2078	ENSSSCP00000032477.1	2078	EQ,Sm,Ev,na	SCN5A,sodium channel protein type 5 subunit alpha isoform c
hum:NP_932173.1	2016	Susscr4EVm000402t12	2075	ncbi:XP_003133493.1	2079	ENSSSCP00000032477.1	2078	EQ,Sm,Ev,na	SCN5A,sodium channel protein type 5 subunit alpha isoform a
hum:NP_078928.3	2015	Susscr4EVm000407t1	2016	ncbi:XP_020954245.1	2016	ENSSSCP00000005195.3	2016	EQ,Nc,Sm,na	LRRK1,leucine-rich repeat serine/threonine-protein kinase 1
hum:XP_016859425.1	2015	Susscr4EVm000301t10	2085	ncbi:XP_020930417.1	1999	ENSSSCP00000056972.1	1949	Ev,Nc,Sm,na	BAZ2B,bromodomain adjacent to zinc finger domain protein 2B isoform X25
hum:NP_055950.1	2012	Susscr4EVm000398t2	2012	ncbi:XP_020934889.1	2012	ENSSSCP00000057110.1	2012	EQ,Nc,Sm,na	NUP205,nuclear pore complex protein Nup205 isoform 1
hum:XP_006719592.1	2012	Susscr4EVm000309t2	1999	ncbi:XP_020947646.1	1993	ENSSSCP00000058445.1	1993	EQ,Nc,Sm,na	PTPRB,receptor-type tyrosine-protein phosphatase beta isoform X3
hum:XP_016868975.1	2012	Susscr4EVm000312t11	2108	ncbi:XP_020933573.1	2109	ENSSSCP00000043013.1	2108	EQ,Ev,Sm,na	PCM1,pericentriolar material 1 protein isoform X12
hum:NP_001159435.1	2009	Susscr4EVm000403t4	2088	ncbi:XP_020927336.1	2070	ENSSSCP00000012006.3	2075	Ev,Sm,Nc,na	SCN1A,sodium channel protein type 1 subunit alpha isoform 1
hum:NP_001339565.1	2009	Susscr4EVm000312t11	2105	ncbi:XP_020933566.1	2105	ENSSSCP00000043013.1	2105	EQ,Nc,Sm,na	PCM1,pericentriolar material 1 protein isoform 8
hum:XP_006717953.1	2008	Susscr4EVm000278t1	1915	ncbi:XP_020929669.1	1917	ENSSSCP00000047948.1	1915	EQ,Ev,Sm,na	PLCE1,1-phosphatidylinositol 4,5-bisphosphate phosphodiesterase epsilon-1 isoform X4
hum:XP_016874085.1	2008	Susscr4EVm000377t1	2001	ncbi:XP_013835018.2	2001	ENSSSCP00000059289.1	2001	EQ,Nc,Sm,na	ARHGAP32,rho GTPase-activating protein 32 isoform X4
hum:NP_001035232.1	2005	Susscr4EVm000403t1	2072	ncbi:XP_020927335.1	2072	ENSSSCP00000012006.3	2039	EQ,Nc,Sm,na	SCN2A,sodium channel protein type 2 subunit alpha isoform 1
hum:XP_024304643.1	2005	Susscr4EVm000041t1	2083	ncbi:XP_020919920.1	2208	ENSSSCP00000053326.1	2061	Nc,Ev,Sm,na	DNAH10,dynein heavy chain 10, axonemal isoform X11
hum:XP_024308847.1	2005	Susscr4EVm000450t3	1891	ncbi:XP_020930866.1	1816	ENSSSCP00000026158.3	1411	Ev,Nc,Sm,Smlo,	TNS1,tensin-1 isoform X12
hum:NP_006757.2	2004	Susscr4EVm000376t4	2005	ncbi:XP_005671174.1	2005	ENSSSCP00000056682.1	2008	EQ,Ev,Nc,na	KAT6A,histone acetyltransferase KAT6A isoform 1
hum:NP_004548.3	2003	Susscr4EVm000056t7	2006	ncbi:NP_001116619.1	1987	ENSSSCP00000001551.2	1987	Ev,Nc,Sm,na	NOTCH4,neurogenic locus notch homolog protein 4 preproprotein
hum:XP_016883475.1	2003	Susscr4EVm000372t27	1982	ncbi:XP_020950440.1	1981	ENSSSCP00000019082.3	1967	EQ,Nc,Sm,na	MYH7B,myosin-7B isoform X1
hum:NP_001120680.1	2002	Susscr4EVm000400t1	1529	ncbi:XP_003129326.3	2034	ENSSSCP00000009765.3	2034	EQ,Sm,Ev,Evlo,	TET2,methylcytosine dioxygenase TET2 isoform a
hum:NP_001333696.1	2002	Susscr4EVm000236t7	2061	ncbi:XP_020929341.1	1651	ENSSSCP00000010627.3	1651	Ev,Nc,Sm,Nclo,Smlo,	MYO18A,unconventional myosin-XVIIIa isoform e
hum:XP_011524969.1	2002	Susscr4EVm000212t12	1918	ncbi:XP_020950082.1	1918	ENSSSCP00000003278.3	1029	EQ,Nc,Sm,Smfr,Smlo,	CIC,protein capicua homolog isoform X10
hum:XP_011530459.2	2002	Susscr4EVm000487t1	1932	ncbi:XP_003482466.3	1975	ENSSSCP00000047399.1	1920	Nc,Ev,Sm,na	SHROOM3,protein Shroom3 isoform X1
hum:XP_011534830.1	2002	Susscr4EVm000409t1	1975	ncbi:XP_020943196.1	1932	ENSSSCP00000023098.2	1954	Ev,Sm,Nc,na	EML5,echinoderm microtubule-associated protein-like 5 isoform X1
hum:XP_011509090.1	2001	Susscr4EVm000357t16	2005	ncbi:XP_013839891.1	2005	ENSSSCP00000052183.1	2005	EQ,Nc,Sm,na	PIKFYVE,1-phosphatidylinositol 3-phosphate 5-kinase isoform X12
hum:XP_011522904.1	2001	Susscr4EVm000401t1	2038	ncbi:XP_020923785.1	2038	ENSSSCP00000050433.1	2038	EQ,Nc,Sm,na	TANC2,protein TANC2 isoform X9
hum:NP_001005273.1	2000	Susscr4EVm000347t43	2016	ncbi:XP_020923504.1	2002	ENSSSCP00000031667.1	1972	Ev,Nc,Sm,na	CHD3,chromodomain-helicase-DNA-binding protein 3 isoform 1
hum:NP_008853.3	2000	Susscr4EVm000403t7	2054	ncbi:XP_020947323.1	2038	ENSSSCP00000012006.3	2032	Ev,Nc,Sm,na	SCN3A,sodium channel protein type 3 subunit alpha isoform 1
hum:XP_005251680.1	2000	Susscr4EVm000362t2	2078	ncbi:XP_020919377.1	2112	ENSSSCP00000034723.1	2078	Nc,Ev,Sm,na	MPDZ,multiple PDZ domain protein isoform X6
hum:XP_016859966.1	2000	Susscr4EVm000388t1	2060	ncbi:XP_020943178.1	1854	ENSSSCP00000008970.3	1854	Ev,Nc,Sm,na	CCDC88A,girdin isoform X3
hum:NP_001177387.1	1999	Susscr4EVm000282t1	2075	ncbi:XP_020952206.1	2077	ENSSSCP00000031616.1	2077	EQ,Sm,Ev,na	DOCK8,dedicator of cytokinesis protein 8 isoform 2
hum:XP_024307090.1	1999	Susscr4EVm000209t25	2010	ncbi:XP_013850261.1	2017	ENSSSCP00000041604.1	2011	EQ,Sm,Ev,na	ABCA7,ATP-binding cassette sub-family A member 7 isoform X8
hum:XP_016881477.1	1998	Susscr4EVm000448t2	1875	ncbi:XP_020951822.1	1869	ENSSSCP00000004006.3	1869	EQ,Nc,Sm,na	GREB1L,GREB1-like protein isoform X1
hum:NP_001274418.1	1997	Susscr4EVm000343t2	2029	ncbi:XP_013840784.1	2094	ENSSSCP00000047895.1	2003	Nc,Ev,Sm,na	OTOF,otoferlin isoform e
hum:XP_011527243.1	1997	Susscr4EVm000372t27	1975	ncbi:XP_013840744.1	1989	ENSSSCP00000019082.3	1968	Nc,Ev,Sm,na	MYH7B,myosin-7B isoform X2
hum:XP_011510422.1	1996	Susscr4EVm000343t10	2078	ncbi:XP_020929511.1	2034	ENSSSCP00000008874.3	2060	Ev,Sm,Nc,na	FER1L5,fer-1-like protein 5 isoform X11
hum:XP_016876552.1	1995	Susscr4EVm000409t1	1975	ncbi:XP_020955251.1	1932	ENSSSCP00000023098.2	1947	Ev,Sm,Nc,na	EML5,echinoderm microtubule-associated protein-like 5 isoform X4
hum:XP_011536841.1	1994	Susscr4EVm000185t26	1991	ncbi:XP_020948306.1	1977	ENSSSCP00000000911.3	1980	Ev,Sm,Nc,na	STAB2,stabilin-2 isoform X4
hum:XP_011517904.1	1992	Susscr4EVm000441t1	1999	ncbi:XP_020920575.1	1998	ENSSSCP00000022198.2	1896	EQ,Nc,Sm,na	ARHGAP21,rho GTPase-activating protein 21 isoform X1
hum:XP_016871953.1	1992	Susscr4EVm000068t31	2120	ncbi:XP_020957454.1	2064	ENSSSCP00000009843.3	2143	Sm,Ev,Nc,na	WDFY4,WD repeat- and FYVE domain-containing protein 4 isoform X6
hum:XP_011533099.1	1991	Susscr4EVm000277t3	1933	ncbi:XP_020929603.1	1910	ENSSSCP00000051522.1	1910	Ev,Nc,Sm,na	POLE,DNA polymerase epsilon catalytic subunit A isoform X2
hum:XP_011515983.1	1990	Susscr4EVm000753t11	1235	ncbi:XP_020921179.1	1901	ENSSSCP00000059304.1	1901	EQ,Sm,Ev,Evfr,Evlo,	UNC13B,protein unc-13 homolog B isoform X1
hum:NP_055880.2	1989	Susscr4EVm000392t1	2019	ncbi:XP_013834813.1	2019	ENSSSCP00000055029.1	2019	EQ,Nc,Sm,na	EXPH5,exophilin-5 isoform 1
hum:NP_659419.3	1989	Susscr4EVm000422t1	1989	ncbi:XP_020947660.1	1989	ENSSSCP00000000538.3	1989	EQ,Nc,Sm,na	ZFC3H1,zinc finger C3H1 domain-containing protein
hum:XP_011533852.1	1988	Susscr4EVm000541t1	1924	ncbi:XP_020946700.1	1924	ENSSSCP00000049339.1	1117	EQ,Nc,Sm,Smfr,Smlo,	AK9,adenylate kinase 9 isoform X1
hum:NP_115642.3	1984	Susscr4EVm017876t1	238	ncbi:XP_005653106.2	1868	ENSSSCP00000009109.2	1868	EQ,Sm,Ev,Evfr,Evlo,	C2orf16,uncharacterized protein C2orf16
hum:XP_016860150.1	1983	Susscr4EVm000403t14	2055	ncbi:XP_020947323.1	2036	ENSSSCP00000058903.1	2025	Ev,Nc,Sm,na	SCN3A,sodium channel protein type 3 subunit alpha isoform X3
hum:NP_001131139.1	1982	Susscr4EVm000425t1	2004	ncbi:XP_005659355.1	1990	ENSSSCP00000058485.1	1990	Ev,Nc,Sm,na	CASP8AP2,CASP8-associated protein 2
hum:NP_001317189.1	1980	Susscr4EVm000403t4	2070	ncbi:XP_020927335.1	2043	ENSSSCP00000012006.3	2039	Ev,Nc,Sm,na	SCN8A,sodium channel protein type 8 subunit alpha isoform 3
hum:NP_003897.2	1980	Susscr4EVm000420t1	1996	ncbi:XP_020938150.1	1996	ENSSSCP00000021729.2	1996	EQ,Nc,Sm,na	MCM3AP,germinal-center associated nuclear protein
hum:NP_004230.2	1979	Susscr4EVm000432t1	1962	ncbi:XP_020955280.1	1962	ENSSSCP00000053345.1	1962	EQ,Nc,Sm,na	TRIP11,thyroid receptor-interacting protein 11 isoform 1
hum:NP_001135452.1	1977	Susscr4EVm000421t1	1996	ncbi:XP_020952590.1	1982	ENSSSCP00000051922.1	1982	Ev,Nc,Sm,na	TP53BP1,TP53-binding protein 1 isoform 1
hum:XP_011509356.1	1976	Susscr4EVm000301t18	1984	ncbi:XP_020930417.1	1963	ENSSSCP00000056972.1	1793	Ev,Nc,Sm,na	BAZ2B,bromodomain adjacent to zinc finger domain protein 2B isoform X26
hum:XP_006723818.1	1975	Susscr4EVm000368t1	995	ncbi:XP_020933958.1	1098	ENSSSCP00000037766.1	925	Nc,Ev,Sm,Smlo,	NCOA6,nuclear receptor coactivator 6 isoform X11
hum:XP_016868980.1	1974	Susscr4EVm000312t11	2109	ncbi:XP_020933590.1	2109	ENSSSCP00000043013.1	2109	EQ,Nc,Sm,na	PCM1,pericentriolar material 1 protein isoform X15
hum:XP_011543207.1	1973	Susscr4EVm000238t2	1982	ncbi:XP_020918146.1	1948	ENSSSCP00000015754.3	1948	Ev,Nc,Sm,na	C2CD3,C2 domain-containing protein 3 isoform X4
hum:XP_006722059.3	1971	Susscr4EVm000311t1	2078	ncbi:XP_020936982.1	2078	ENSSSCP00000054433.1	2066	EQ,Nc,Sm,na	TNRC6C,trinucleotide repeat-containing gene 6C protein isoform X1
hum:XP_024305999.1	1971	Susscr4EVm000428t10	2099	ncbi:XP_020922190.1	2052	ENSSSCP00000058109.1	2006	Ev,Nc,Sm,na	TNRC6A,trinucleotide repeat-containing gene 6A protein isoform X1
hum:NP_000928.1	1970	Susscr4EVm000405t1	1984	ncbi:XP_020923484.1	1970	ENSSSCP00000024326.2	1970	Ev,Nc,Sm,na	POLR2A,DNA-directed RNA polymerase II subunit RPB1
hum:NP_001339569.1	1970	Susscr4EVm000312t11	2105	ncbi:XP_020933581.1	2105	ENSSSCP00000043013.1	2105	EQ,Nc,Sm,na	PCM1,pericentriolar material 1 protein isoform 12
hum:XP_006722277.1	1970	Susscr4EVm000437t2	1995	ncbi:XP_020922402.1	1972	ENSSSCP00000045841.1	1972	Ev,Nc,Sm,na	HELZ,probable helicase with zinc finger domain isoform X1
hum:XP_011542792.1	1969	Susscr4EVm000446t1	1973	ncbi:XP_020933972.1	1978	ENSSSCP00000028637.2	1722	EQ,Ev,Sm,Smlo,	ANK1,ankyrin-1 isoform X1
hum:XP_016880395.1	1968	Susscr4EVm000311t1	2074	ncbi:XP_020936974.1	2074	ENSSSCP00000054433.1	2063	EQ,Nc,Sm,na	TNRC6C,trinucleotide repeat-containing gene 6C protein isoform X2
hum:XP_016870979.1	1967	Susscr4EVm000117t32	2033	0	0	ENSSSCP00000058060.1	1888	Ev,Sm,Nc,Ncmi,Nclo,	TACC2,transforming acidic coiled-coil-containing protein 2 isoform X23
hum:XP_016879514.1	1967	Susscr4EVm000381t2	1905	ncbi:XP_020923680.1	1903	ENSSSCP00000051697.1	1903	EQ,Nc,Sm,na	RAI1,retinoic acid-induced protein 1 isoform X1
hum:NP_001340274.1	1966	Susscr4EVm000427t1	1236	ncbi:XP_020942065.1	849	ENSSSCP00000035017.1	1427	Sm,Ev,Nc,Evlo,Ncfr,Nclo,	SETD1B,histone-lysine N-methyltransferase SETD1B
hum:XP_024303732.1	1966	Susscr4EVm000044t5	1982	ncbi:XP_020933972.1	1865	ENSSSCP00000010888.3	1790	Ev,Nc,Sm,na	ANK3,ankyrin-3 isoform X33
hum:NP_001136235.1	1962	Susscr4EVm000365t1	1747	ncbi:XP_020929194.1	1463	ENSSSCP00000011114.3	1685	Ev,Sm,Nc,Nclo,	PCDH15,protocadherin-15 isoform CD1-1 precursor
hum:NP_001153633.1	1962	Susscr4EVm000402t8	2025	ncbi:XP_003133492.1	2024	ENSSSCP00000032477.1	2024	EQ,Nc,Sm,na	SCN5A,sodium channel protein type 5 subunit alpha isoform f
hum:XP_024302451.1	1962	Susscr4EVm000348t10	1960	ncbi:XP_020943640.1	1966	ENSSSCP00000008091.3	1907	EQ,Ev,Sm,na	SDK1,protein sidekick-1 isoform X2
hum:NP_002464.1	1960	Susscr4EVm000372t1	1976	ncbi:XP_020947197.1	1981	ENSSSCP00000000149.3	1960	EQ,Ev,Sm,na	MYH9,myosin-9
hum:NP_005641.1	1960	Susscr4EVm000213t1	1967	ncbi:XP_020947094.1	1943	ENSSSCP00000034703.1	1935	Ev,Nc,Sm,na	TCF20,transcription factor 20 isoform 1
hum:XP_005265428.1	1959	Susscr4EVm000402t1	2044	ncbi:XP_020931828.1	2055	ENSSSCP00000057874.1	2044	Nc,Ev,Sm,na	SCN10A,sodium channel protein type 10 subunit alpha isoform X1
hum:NP_001317569.1	1958	Susscr4EVm000476t1	2016	ncbi:XP_020955846.1	2006	ENSSSCP00000033438.1	1959	Ev,Nc,Sm,na	DENND4C,DENN domain-containing protein 4C isoform 2
hum:XP_011533738.1	1954	Susscr4EVm000095t8	1961	ncbi:XP_020948028.1	1957	ENSSSCP00000004838.3	1878	EQ,Nc,Sm,na	COL12A1,collagen alpha-1(XII) chain isoform X4
hum:XP_011542796.1	1954	Susscr4EVm000446t12	1914	ncbi:XP_020933972.1	1963	ENSSSCP00000028637.2	1722	Nc,Ev,Sm,Smlo,	ANK1,ankyrin-1 isoform X4
hum:NP_001077422.1	1953	Susscr4EVm000458t2	1957	ncbi:XP_020944065.1	1959	ENSSSCP00000009027.3	1956	EQ,Ev,Sm,na	THADA,thyroid adenoma-associated protein isoform a
hum:XP_005263716.1	1953	Susscr4EVm000455t4	1959	ncbi:XP_020931456.1	1866	ENSSSCP00000044591.1	1074	Ev,Nc,Sm,Smfr,Smlo,	NCKAP5,nck-associated protein 5 isoform X1
hum:XP_011517566.1	1953	Susscr4EVm000257t151	1101	ncbi:XP_020936786.1	798	ENSSSCP00000035562.1	798	Ev,Nc,Sm,Nclo,Smlo,	SEC16A,protein transport protein Sec16A isoform X17
hum:XP_011542797.1	1953	Susscr4EVm000446t6	1937	ncbi:XP_020933972.1	1945	ENSSSCP00000028637.2	1722	EQ,Ev,Sm,Smlo,	ANK1,ankyrin-1 isoform X5
hum:XP_011523855.1	1951	Susscr4EVm000297t1	2048	ncbi:XP_020928783.1	2057	ENSSSCP00000048380.1	2055	EQ,Sm,Ev,na	MED13,mediator of RNA polymerase II transcription subunit 13 isoform X3
hum:NP_001158137.1	1950	Susscr4EVm000410t1	1920	ncbi:XP_020934241.1	1950	ENSSSCP00000017496.3	1877	Nc,Ev,Sm,na	KIAA1549,UPF0606 protein KIAA1549 isoform 2
hum:NP_055483.2	1949	Susscr4EVm000448t1	2029	ncbi:XP_020951822.1	1999	ENSSSCP00000021870.2	1955	Ev,Nc,Sm,na	GREB1,0
hum:NP_002841.3	1948	Susscr4EVm000433t1	1995	ncbi:XP_020952499.1	2017	ENSSSCP00000031241.1	1953	Nc,Ev,Sm,na	PTPRS,receptor-type tyrosine-protein phosphatase S isoform 1 precursor
hum:XP_011509935.1	1948	Susscr4EVm000453t1	1948	ncbi:XP_020942690.1	1948	ENSSSCP00000035765.1	1948	EQ,Nc,Sm,na	ANAPC1,anaphase-promoting complex subunit 1 isoform X1
hum:XP_016882866.1	1948	Susscr4EVm000123t5	2022	ncbi:NP_001001771.1	1979	ENSSSCP00000005017.3	1979	Ev,Nc,Sm,na	FBN3,fibrillin-3 isoform X6
hum:NP_055796.1	1946	Susscr4EVm000372t114	1976	ncbi:XP_020923522.1	2000	ENSSSCP00000047787.1	1939	Nc,Ev,Sm,na	MYH15,myosin-15 precursor
hum:XP_024303912.1	1946	Susscr4EVm000271t13	1953	ncbi:XP_020920430.1	1952	ENSSSCP00000011758.3	1899	EQ,Nc,Sm,na	SVIL,supervillin isoform X8
hum:XP_024309179.1	1946	Susscr4EVm000457t1	1834	ncbi:XP_020945454.1	1867	ENSSSCP00000033858.1	1869	EQ,Nc,Ev,na	NUP210,nuclear pore membrane glycoprotein 210 isoform X1
hum:XP_024308848.1	1945	Susscr4EVm000450t1	1830	ncbi:XP_020930866.1	1816	ENSSSCP00000026158.3	1411	Ev,Nc,Sm,Smlo,	TNS1,tensin-1 isoform X13
hum:XP_011542798.1	1944	Susscr4EVm000446t2	1939	ncbi:XP_020933972.1	1978	ENSSSCP00000028637.2	1722	Nc,Ev,Sm,Smlo,	ANK1,ankyrin-1 isoform X7
hum:NP_009044.2	1943	Susscr4EVm025125t1	228	ncbi:XP_020945483.1	942	ENSSSCP00000050551.1	945	EQ,Nc,Ev,Evfr,Evlo,	TCHH,trichohyalin
hum:NP_001093582.1	1941	Susscr4EVm000372t27	1959	ncbi:NP_001098421.1	1941	ENSSSCP00000019082.3	1947	Ev,Sm,Nc,na	MYH2,myosin-2
hum:NP_001157281.1	1941	Susscr4EVm000418t2	1998	ncbi:XP_020923231.1	1949	ENSSSCP00000048130.1	1949	Ev,Nc,Sm,na	WDR81,WD repeat-containing protein 81 isoform 1
hum:XP_011509205.1	1941	Susscr4EVm000968t4	1195	ncbi:XP_020931100.1	1679	ENSSSCP00000017166.3	1680	EQ,Nc,Ev,Evlo,	CFAP65,cilia- and flagella-associated protein 65 isoform X1
hum:XP_024304570.1	1941	Susscr4EVm000439t36	1965	ncbi:XP_020948084.1	1941	ENSSSCP00000000743.2	1941	Ev,Nc,Sm,na	CHD4,chromodomain-helicase-DNA-binding protein 4 isoform X1
hum:XP_011543165.1	1940	Susscr4EVm000379t1	2115	ncbi:XP_020953821.1	2121	ENSSSCP00000055125.1	2114	EQ,Ev,Sm,na	ATG2A,autophagy-related protein 2 homolog A isoform X1
hum:XP_024306616.1	1939	Susscr4EVm000311t1	2048	ncbi:XP_020936979.1	2048	ENSSSCP00000058109.1	2042	EQ,Nc,Sm,na	TNRC6C,trinucleotide repeat-containing gene 6C protein isoform X3
hum:XP_011538764.1	1937	Susscr4EVm000362t6	2161	ncbi:XP_020919414.1	2161	ENSSSCP00000032277.1	2123	EQ,Nc,Sm,na	PATJ,inaD-like protein isoform X1
hum:NP_891550.1	1935	Susscr4EVm000452t1	1948	ncbi:XP_013837305.2	1948	ENSSSCP00000042482.1	1936	EQ,Nc,Sm,na	ADAMTS9,A disintegrin and metalloproteinase with thrombospondin motifs 9 isoform 1 preproprotein
hum:NP_001293066.1	1934	Susscr4EVm001101t1	1036	ncbi:XP_013851760.1	1951	ENSSSCP00000038137.1	1918	Nc,Sm,Ev,Evfr,Evlo,	TDRD15,tudor domain-containing protein 15
hum:NP_001156729.1	1932	Susscr4EVm000436t1	2019	ncbi:XP_020925023.1	2017	ENSSSCP00000012355.3	1983	EQ,Nc,Sm,na	PLXNB3,plexin-B3 isoform 2
hum:NP_056507.2	1932	Susscr4EVm000534t1	1855	ncbi:XP_020940754.1	1937	ENSSSCP00000028508.1	1615	Nc,Ev,Sm,Smlo,	CPAMD8,C3 and PZP-like alpha-2-macroglobulin domain-containing protein 8
hum:XP_016880396.1	1932	Susscr4EVm000311t1	2073	ncbi:XP_020936978.1	2073	ENSSSCP00000054433.1	2062	EQ,Nc,Sm,na	TNRC6C,trinucleotide repeat-containing gene 6C protein isoform X4
hum:NP_001310991.1	1931	Susscr4EVm000397t84	2053	ncbi:XP_020919793.1	1977	ENSSSCP00000011549.3	1920	Ev,Nc,Sm,na	MIA3,transport and Golgi organization protein 1 homolog isoform 3 precursor
hum:XP_011541600.1	1931	Susscr4EVm004599t1	734	ncbi:XP_020940111.1	1940	ENSSSCP00000014972.3	734	Nc,Ev,Sm,Evfr,Evlo,Smfr,Smlo,	ANKRD31,putative ankyrin repeat domain-containing protein 31 isoform X1
hum:XP_011516552.1	1930	Susscr4EVm000872t2	1213	ncbi:XP_020951268.1	1504	ENSSSCP00000038017.1	1503	EQ,Sm,Ev,Evlo,	TRPM6,transient receptor potential cation channel subfamily M member 6 isoform X7
hum:XP_006722063.3	1929	Susscr4EVm000311t4	2070	ncbi:XP_020936980.1	2070	ENSSSCP00000054433.1	2059	EQ,Nc,Sm,na	TNRC6C,trinucleotide repeat-containing gene 6C protein isoform X7
hum:NP_002290.2	1927	Susscr4EVm000468t1	1931	ncbi:XP_020932077.1	1930	ENSSSCP00000020109.2	1933	EQ,Ev,Nc,na	LCT,lactase-phlorizin hydrolase preproprotein
hum:XP_005262352.1	1927	Susscr4EVm000471t11	1932	ncbi:XP_020935610.1	1929	ENSSSCP00000044827.1	1800	EQ,Nc,Sm,na	TAF1,transcription initiation factor TFIID subunit 1 isoform X1
hum:XP_016884942.1	1927	Susscr4EVm015149t1	249	ncbi:XP_020935753.1	1830	ENSSSCP00000028896.2	324	Nc,Sm,Ev,Smfr,Smlo,Evfr,Evlo,	CFAP47,cilia- and flagella-associated protein 47 isoform X2
hum:NP_055918.2	1925	Susscr4EVm000436t26	2045	ncbi:XP_020946936.1	2015	ENSSSCP00000013589.3	2006	Ev,Nc,Sm,na	PLXND1,plexin-D1 precursor
hum:XP_005255916.3	1925	Susscr4EVm000395t6	1985	ncbi:XP_020949368.1	1936	ENSSSCP00000032867.1	1217	Ev,Nc,Sm,Smfr,Smlo,	GSE1,genetic suppressor element 1 isoform X1
hum:XP_024309300.1	1924	Susscr4EVm000408t2	1987	ncbi:XP_020925890.1	1968	ENSSSCP00000040501.1	1968	Ev,Nc,Sm,na	MYLK,myosin light chain kinase, smooth muscle isoform X1
hum:XP_016872867.1	1923	Susscr4EVm001047t5	1390	ncbi:XP_020918558.1	1345	ENSSSCP00000016003.3	1448	Sm,Ev,Nc,na	CEP164,centrosomal protein of 164 kDa isoform X12
hum:NP_001258211.1	1922	Susscr4EVm000474t1	1922	ncbi:NP_001184123.1	1923	ENSSSCP00000034079.1	1922	EQ,Ev,Sm,na	DICER1,endoribonuclease Dicer isoform 1
hum:NP_001338779.1	1922	Susscr4EVm000428t5	2005	ncbi:XP_020922191.1	2044	ENSSSCP00000058109.1	2001	Nc,Ev,Sm,na	TNRC6A,trinucleotide repeat-containing gene 6A protein isoform 3
hum:XP_005273533.1	1921	Susscr4EVm000446t3	1939	ncbi:XP_020933972.1	1913	ENSSSCP00000028637.2	1690	Ev,Nc,Sm,Smlo,	ANK1,ankyrin-1 isoform X12
hum:XP_024309791.1	1920	Susscr4EVm000050t4	2021	ncbi:XP_020933972.1	1557	ENSSSCP00000042184.1	1880	Ev,Sm,Nc,Nclo,	ANK2,ankyrin-2 isoform X20
hum:NP_004738.3	1919	Susscr4EVm000469t1	1921	ncbi:XP_020929899.1	1921	ENSSSCP00000021475.2	1921	EQ,Nc,Sm,na	DLG5,disks large homolog 5
hum:NP_066363.1	1918	Susscr4EVm000456t1	1916	ncbi:XP_020933177.1	1919	ENSSSCP00000019450.2	1919	EQ,Sm,Ev,na	ZNFX1,NFX1-type zinc finger-containing protein 1
hum:XP_011509159.1	1918	Susscr4EVm000005t76	1995	ncbi:XP_020939027.1	1931	ENSSSCP00000052588.1	1895	Ev,Nc,Sm,na	OBSL1,obscurin-like protein 1 isoform X1
hum:NP_001341160.1	1917	Susscr4EVm000050t33	1927	ncbi:XP_020933972.1	1633	ENSSSCP00000028637.2	1923	EQ,Sm,Nc,Nclo,	ANK2,ankyrin-2 isoform 7
hum:XP_016860334.1	1917	Susscr4EVm000089t1	1620	ncbi:XP_020942765.1	1622	ENSSSCP00000008687.3	1620	EQ,Ev,Sm,na	RGPD2,RANBP2-like and GRIP domain-containing protein 2 isoform X1
hum:XP_016861136.1	1916	Susscr4EVm000403t9	1857	ncbi:XP_003131332.1	1847	ENSSSCP00000018312.3	1847	Ev,Nc,Sm,na	SCN11A,sodium channel protein type 11 subunit alpha isoform X1
hum:XP_016859601.1	1915	Susscr4EVm000429t1	1913	ncbi:XP_013839903.1	1927	ENSSSCP00000032550.1	1928	EQ,Nc,Ev,na	MAP2,microtubule-associated protein 2 isoform X1
hum:NP_036553.2	1914	Susscr4EVm000463t2	1909	ncbi:XP_003356375.2	1889	ENSSSCP00000003974.3	1889	Ev,Nc,Sm,na	RLF,zinc finger protein Rlf
hum:XP_011511210.1	1914	Susscr4EVm000327t1	2003	ncbi:XP_020925023.1	1975	ENSSSCP00000013589.3	1963	Ev,Nc,Sm,na	PLXNA1,plexin-A1 isoform X1
hum:XP_011542802.1	1914	Susscr4EVm000446t13	1881	ncbi:XP_020933972.1	1923	ENSSSCP00000028637.2	1690	Nc,Ev,Sm,Smlo,	ANK1,ankyrin-1 isoform X13
hum:XP_024303913.1	1914	Susscr4EVm000271t14	1952	ncbi:XP_020920430.1	1952	ENSSSCP00000011758.3	1867	EQ,Nc,Sm,na	SVIL,supervillin isoform X9
hum:XP_011536103.1	1912	Susscr4EVm000462t1	1930	ncbi:XP_001927787.6	1930	ENSSSCP00000000430.3	1930	EQ,Nc,Sm,na	BAZ2A,bromodomain adjacent to zinc finger domain protein 2A isoform X1
hum:XP_016861315.1	1912	Susscr4EVm000412t1	1865	ncbi:XP_020924501.1	1867	ENSSSCP00000051371.1	1864	EQ,Ev,Sm,na	DOCK3,dedicator of cytokinesis protein 3 isoform X9
hum:XP_011537056.1	1911	Susscr4EVm000452t1	1939	ncbi:XP_013837309.2	1940	ENSSSCP00000012250.3	1928	EQ,Ev,Sm,na	ADAMTS20,A disintegrin and metalloproteinase with thrombospondin motifs 20 isoform X1
hum:NP_689472.3	1910	Susscr4EVm000485t1	1926	ncbi:XP_020954618.1	1919	ENSSSCP00000035396.1	1919	EQ,Nc,Sm,na	TICRR,treslin isoform 2
hum:XP_006721929.1	1910	Susscr4EVm000509t1	1877	ncbi:XP_020922281.1	1877	ENSSSCP00000029678.2	1569	EQ,Nc,Sm,Smlo,	ITGB4,integrin beta-4 isoform X1
hum:XP_011531993.1	1910	Susscr4EVm000166t1	1923	ncbi:XP_020948578.1	1923	ENSSSCP00000034533.1	1923	EQ,Nc,Sm,na	ITPR1,inositol 1,4,5-trisphosphate receptor type 1 isoform X13
hum:XP_024305328.1	1910	Susscr4EVm006960t1	550	ncbi:XP_020954788.1	1910	ENSSSCP00000028433.2	422	Nc,Ev,Sm,Evfr,Evlo,Smfr,Smlo,	TTC6,tetratricopeptide repeat protein 6 isoform X1
hum:NP_997246.2	1909	Susscr4EVm000455t1	1898	ncbi:XP_020931456.1	1915	ENSSSCP00000044591.1	1074	Nc,Ev,Sm,Smfr,Smlo,	NCKAP5,nck-associated protein 5 isoform 1
hum:XP_011537724.1	1908	Susscr4EVm000438t3	1963	ncbi:XP_020928272.1	1894	ENSSSCP00000038012.1	1883	Ev,Nc,Sm,na	DOCK1,dedicator of cytokinesis protein 1 isoform X1
hum:XP_016859186.1	1908	Susscr4EVm000005t76	1983	ncbi:XP_020939017.1	1951	ENSSSCP00000052588.1	1895	Ev,Nc,Sm,na	OBSL1,obscurin-like protein 1 isoform X3
hum:NP_001193901.1	1907	Susscr4EVm000309t1	1920	ncbi:XP_001926902.5	1920	ENSSSCP00000000535.3	1920	EQ,Nc,Sm,na	PTPRB,receptor-type tyrosine-protein phosphatase beta isoform d precursor
hum:NP_001307764.1	1907	Susscr4EVm000417t1	2014	ncbi:XP_020918843.1	2014	ENSSSCP00000033438.1	2014	EQ,Nc,Sm,na	DENND4A,C-myc promoter-binding protein isoform 3
hum:NP_065829.3	1907	Susscr4EVm000668t1	1715	ncbi:XP_020954559.1	1715	ENSSSCP00000041544.1	1715	EQ,Nc,Sm,na	ALPK3,alpha-protein kinase 3
hum:XP_006722236.1	1907	Susscr4EVm000937t1	1486	ncbi:XP_020922932.1	1868	ENSSSCP00000030467.2	1851	Nc,Sm,Ev,Evlo,	TSPOAP1,peripheral-type benzodiazepine receptor-associated protein 1 isoform X1
hum:XP_016883236.1	1907	Susscr4EVm000368t9	1051	ncbi:XP_013840750.1	1023	ENSSSCP00000037766.1	1023	Ev,Nc,Sm,na	NCOA6,nuclear receptor coactivator 6 isoform X12
hum:NP_109590.3	1906	Susscr4EVm000381t6	1922	ncbi:XP_020923680.1	1922	ENSSSCP00000051697.1	1922	EQ,Nc,Sm,na	RAI1,retinoic acid-induced protein 1
hum:XP_005254648.1	1906	Susscr4EVm000454t4	1937	ncbi:XP_005659765.1	1907	ENSSSCP00000039385.1	1907	Ev,Nc,Sm,na	ZNF106,zinc finger protein 106 isoform X1
hum:XP_005262354.1	1906	Susscr4EVm000471t7	1932	ncbi:XP_020935610.1	1929	ENSSSCP00000044827.1	1779	EQ,Nc,Sm,na	TAF1,transcription initiation factor TFIID subunit 1 isoform X3
hum:NP_002325.2	1905	Susscr4EVm000480t1	1905	ncbi:XP_020940889.1	1905	ENSSSCP00000014076.3	1905	EQ,Nc,Sm,na	LRP4,low-density lipoprotein receptor-related protein 4 precursor
hum:NP_055873.1	1905	Susscr4EVm000413t1	1906	ncbi:XP_020921284.1	1906	ENSSSCP00000042925.1	1820	EQ,Nc,Sm,na	VWA8,von Willebrand factor A domain-containing protein 8 isoform a precursor
hum:XP_005269705.1	1905	Susscr4EVm000484t1	1905	ncbi:XP_003483549.2	1905	ENSSSCP00000010990.3	1716	EQ,Nc,Sm,na	ZSWIM8,zinc finger SWIM domain-containing protein 8 isoform X1
hum:XP_011519908.2	1904	Susscr4EVm000613t1	1916	ncbi:XP_005659654.1	1916	ENSSSCP00000046609.1	1916	EQ,Nc,Sm,na	MYO5A,unconventional myosin-Va isoform X1
hum:XP_005246356.1	1903	Susscr4EVm000483t1	1904	ncbi:XP_020932162.1	1904	ENSSSCP00000016892.3	1763	EQ,Nc,Sm,na	UBR3,E3 ubiquitin-protein ligase UBR3 isoform X1
hum:XP_011529011.1	1903	Susscr4EVm000419t4	1901	ncbi:XP_020946723.1	1918	ENSSSCP00000035622.1	1901	Nc,Ev,Sm,na	SBF1,myotubularin-related protein 5 isoform X1
hum:XP_011512018.1	1902	Susscr4EVm000587t1	1722	ncbi:XP_020956776.1	1704	ENSSSCP00000009371.3	1704	Ev,Nc,Sm,na	N4BP2,NEDD4-binding protein 2 isoform X1
hum:NP_057332.1	1901	Susscr4EVm000451t4	1913	ncbi:XP_020921282.1	1906	ENSSSCP00000044522.1	1024	EQ,Nc,Sm,Smfr,Smlo,	AKAP11,A-kinase anchor protein 11
hum:XP_011528984.1	1901	Susscr4EVm000436t1	2008	ncbi:XP_020919553.1	1985	ENSSSCP00000039514.1	1935	Ev,Nc,Sm,na	PLXNB2,plexin-B2 isoform X1
hum:XP_005263966.1	1900	Susscr4EVm000460t12	1965	ncbi:XP_020942903.1	1931	ENSSSCP00000056165.1	1931	Ev,Nc,Sm,na	TMEM131,transmembrane protein 131 isoform X1
hum:XP_006722237.1	1900	Susscr4EVm000937t2	1484	ncbi:XP_020922932.1	1868	ENSSSCP00000030467.2	1849	Nc,Sm,Ev,Evlo,	TSPOAP1,peripheral-type benzodiazepine receptor-associated protein 1 isoform X2
hum:XP_024306413.1	1900	Susscr4EVm000320t2	1921	ncbi:XP_020920169.1	1903	ENSSSCP00000056377.1	1903	Ev,Nc,Sm,na	NAV1,neuron navigator 1 isoform X8
hum:NP_542376.2	1899	Susscr4EVm000095t8	1902	ncbi:XP_020948033.1	1901	ENSSSCP00000004838.3	1881	EQ,Nc,Sm,na	COL12A1,collagen alpha-1(XII) chain short isoform precursor
hum:XP_016867010.1	1899	Susscr4EVm000359t1	1969	ncbi:NP_001116610.1	821	ENSSSCP00000029389.2	821	Ev,Nc,Sm,Ncfr,Nclo,Smfr,Smlo,	MDC1,mediator of DNA damage checkpoint protein 1 isoform X7
hum:NP_079357.2	1898	Susscr4EVm000464t2	1923	ncbi:XP_005666290.3	1922	ENSSSCP00000053168.1	1625	EQ,Nc,Sm,Smlo,	NYNRIN,protein NYNRIN
hum:XP_006717865.1	1898	Susscr4EVm000044t10	1898	ncbi:XP_005671069.2	1795	ENSSSCP00000030962.2	1906	EQ,Ev,Nc,na	ANK3,ankyrin-3 isoform X34
hum:NP_001273003.1	1895	Susscr4EVm000471t4	1934	ncbi:XP_020935609.1	1929	ENSSSCP00000044827.1	1768	EQ,Nc,Sm,na	TAF1,transcription initiation factor TFIID subunit 1 isoform 3
hum:NP_065962.1	1894	Susscr4EVm000466t4	1997	ncbi:XP_020946936.1	2005	ENSSSCP00000013589.3	1967	EQ,Ev,Sm,na	PLXNA4,plexin-A4 isoform 1 precursor
hum:NP_115921.2	1894	Susscr4EVm000481t2	1469	ncbi:XP_005659175.2	1474	ENSSSCP00000004378.3	1913	Sm,Nc,Ev,Nclo,Evlo,	FNDC1,fibronectin type III domain-containing protein 1 precursor
hum:XP_005252904.2	1894	Susscr4EVm001204t1	1297	ncbi:XP_013849898.1	1711	ENSSSCP00000014143.3	1239	Nc,Ev,Sm,Evlo,Smlo,	KIAA1549L,UPF0606 protein KIAA1549L isoform X3
hum:XP_011510890.1	1894	Susscr4EVm000436t83	2020	ncbi:XP_020946936.1	1981	ENSSSCP00000013589.3	1973	Ev,Nc,Sm,na	PLXND1,plexin-D1 isoform X1
hum:XP_016877839.1	1894	Susscr4EVm000482t1	1904	ncbi:XP_013848457.1	1886	ENSSSCP00000058791.1	1885	Ev,Nc,Sm,na	TRPM7,transient receptor potential cation channel subfamily M member 7 isoform X1
hum:NP_002963.2	1893	Susscr4EVm000444t2	1916	ncbi:XP_020946723.1	1918	ENSSSCP00000033035.1	1915	EQ,Ev,Sm,na	SBF1,myotubularin-related protein 5
hum:NP_060719.4	1893	Susscr4EVm000443t2	1913	ncbi:XP_020923763.1	1913	ENSSSCP00000024746.2	878	EQ,Nc,Sm,Smfr,Smlo,	CDK5RAP2,CDK5 regulatory subunit-associated protein 2 isoform a
hum:XP_006718110.1	1893	Susscr4EVm000500t1	1911	ncbi:XP_003483597.2	1895	ENSSSCP00000011270.3	1895	Ev,Nc,Sm,na	GBF1,Golgi-specific brefeldin A-resistance guanine nucleotide exchange factor 1 isoform X1
hum:NP_001229417.1	1892	Susscr4EVm000484t1	1905	ncbi:XP_013838802.2	1905	ENSSSCP00000010990.3	1716	EQ,Nc,Sm,na	ZSWIM8,zinc finger SWIM domain-containing protein 8 isoform 3
hum:XP_005260061.1	1889	Susscr4EVm000561t1	1895	ncbi:XP_013846561.1	1895	ENSSSCP00000027403.2	1895	EQ,Nc,Sm,na	WIZ,protein Wiz isoform X1
hum:NP_997191.2	1888	Susscr4EVm000457t2	1865	ncbi:XP_020945454.1	1888	ENSSSCP00000033858.1	1865	Nc,Ev,Sm,na	NUP210L,nuclear pore membrane glycoprotein 210-like isoform 1 precursor
hum:XP_016873816.1	1888	Susscr4EVm000521t1	1865	ncbi:XP_013849914.1	1686	ENSSSCP00000047798.1	1865	EQ,Sm,Nc,na	QSER1,glutamine and serine-rich protein 1 isoform X1
hum:NP_079199.2	1887	Susscr4EVm000457t3	1948	ncbi:XP_020925047.1	1890	ENSSSCP00000044829.1	1928	Ev,Sm,Nc,na	NUP210,nuclear pore membrane glycoprotein 210 precursor
hum:XP_005252096.1	1887	Susscr4EVm000488t1	1893	ncbi:XP_020920657.1	1885	ENSSSCP00000057080.1	1885	EQ,Nc,Sm,na	PCSK5,proprotein convertase subtilisin/kexin type 5 isoform X1
hum:XP_005257785.1	1887	0	0	ncbi:XP_020922255.1	2033	ENSSSCP00000054079.1	1930	Nc,Sm,Ev,Evmi,Evlo,	QRICH2,glutamine-rich protein 2 isoform X1
hum:XP_006712793.1	1887	Susscr4EVm000516t1	1906	ncbi:XP_020932136.1	1892	ENSSSCP00000022642.2	1765	Ev,Nc,Sm,na	ZNF142,zinc finger protein 142 isoform X1
hum:NP_001136237.1	1886	Susscr4EVm000365t1	1780	ncbi:NP_001177099.1	1292	ENSSSCP00000011114.3	1379	Ev,Sm,Nc,Smlo,Nclo,	PCDH15,protocadherin-15 isoform CD1-6 precursor
hum:XP_024303733.1	1886	Susscr4EVm000044t10	1898	ncbi:XP_020933972.1	1716	ENSSSCP00000030962.2	1906	EQ,Ev,Nc,na	ANK3,ankyrin-3 isoform X37
hum:XP_005254543.1	1885	Susscr4EVm000482t1	1905	ncbi:XP_003121563.2	1886	ENSSSCP00000058791.1	1886	Ev,Nc,Sm,na	TRPM7,transient receptor potential cation channel subfamily M member 7 isoform X3
hum:XP_011510350.1	1885	Susscr4EVm000518t1	1882	ncbi:XP_020930418.1	1882	ENSSSCP00000055486.1	1882	EQ,Nc,Sm,na	TANC1,protein TANC1 isoform X2
hum:XP_016875660.1	1885	Susscr4EVm000320t1	1954	ncbi:XP_020920169.1	1954	ENSSSCP00000056377.1	1954	EQ,Nc,Sm,na	NAV3,neuron navigator 3 isoform X12
hum:NP_009231.2	1884	Susscr4EVm000494t1	1911	ncbi:XP_005657013.1	1890	ENSSSCP00000034439.1	1890	Ev,Nc,Sm,na	BRCA1,breast cancer type 1 susceptibility protein isoform 2
hum:XP_005260807.1	1883	Susscr4EVm000502t1	1894	ncbi:XP_020933701.1	1911	ENSSSCP00000042051.1	1180	Nc,Ev,Sm,Smfr,Smlo,	KIF16B,kinesin-like protein KIF16B isoform X1
hum:XP_016857028.1	1883	Susscr4EVm000431t2	1753	ncbi:XP_020950986.1	1419	ENSSSCP00000042747.1	1419	Ev,Nc,Sm,Nclo,Smlo,	CASZ1,zinc finger protein castor homolog 1 isoform X1
hum:NP_056471.1	1882	Susscr4EVm000346t8	1913	ncbi:XP_020937202.1	1903	ENSSSCP00000057833.1	1903	Ev,Nc,Sm,na	KIF26A,kinesin-like protein KIF26A
hum:XP_011533856.1	1881	Susscr4EVm000541t1	1505	ncbi:XP_020946714.1	1696	ENSSSCP00000049339.1	872	Nc,Ev,Sm,Evlo,Smfr,Smlo,	AK9,adenylate kinase 9 isoform X4
hum:NP_001185879.1	1880	Susscr4EVm000540t1	1877	ncbi:XP_020921564.1	1877	ENSSSCP00000010189.3	1867	EQ,Nc,Sm,na	MYO16,unconventional myosin-XVI isoform 1
hum:XP_011515533.1	1880	Susscr4EVm000326t2	1824	ncbi:XP_020944612.1	1883	ENSSSCP00000059037.1	1854	Nc,Sm,Ev,na	FER1L6,fer-1-like protein 6 isoform X1
hum:XP_024308849.1	1880	Susscr4EVm000450t6	1817	ncbi:XP_020930866.1	1816	ENSSSCP00000026158.3	1411	EQ,Nc,Sm,Smlo,	TNS1,tensin-1 isoform X14
hum:NP_001341174.1	1879	Susscr4EVm000050t21	1934	ncbi:XP_020933972.1	1570	ENSSSCP00000042184.1	1893	Ev,Sm,Nc,Nclo,	ANK2,ankyrin-2 isoform 18
hum:XP_006712128.1	1879	Susscr4EVm000458t1	1314	ncbi:XP_020944065.1	1317	ENSSSCP00000009027.3	1314	EQ,Ev,Sm,na	THADA,thyroid adenoma-associated protein isoform X3
hum:XP_011520940.2	1879	Susscr4EVm000542t5	1845	ncbi:XP_020942433.1	1876	ENSSSCP00000038788.1	1845	Nc,Ev,Sm,na	TSC2,tuberin isoform X4
hum:XP_016878010.1	1878	Susscr4EVm000517t3	1859	ncbi:XP_020954502.1	1859	ENSSSCP00000054972.1	1859	EQ,Nc,Sm,na	TJP1,tight junction protein ZO-1 isoform X1
hum:NP_065176.3	1877	Susscr4EVm000320t2	1892	ncbi:XP_020948748.1	1948	ENSSSCP00000056377.1	1877	Nc,Ev,Sm,na	NAV1,neuron navigator 1 isoform 1
hum:XP_011519911.2	1877	Susscr4EVm000613t1	1890	ncbi:XP_020948667.1	1898	ENSSSCP00000046609.1	1890	EQ,Ev,Sm,na	MYO5A,unconventional myosin-Va isoform X5
hum:XP_011542963.1	1877	Susscr4EVm000438t3	1929	ncbi:XP_020929395.1	1878	ENSSSCP00000038012.1	1848	Ev,Nc,Sm,na	DOCK5,dedicator of cytokinesis protein 5 isoform X1
hum:XP_005263738.1	1876	Susscr4EVm001413t6	1020	ncbi:XP_020931402.1	774	ENSSSCP00000055644.1	753	Ev,Nc,Sm,Nclo,Smlo,	ARHGEF4,rho guanine nucleotide exchange factor 4 isoform X1
hum:XP_011512123.1	1875	Susscr4EVm000508t1	1869	ncbi:XP_020955953.1	1084	ENSSSCP00000049381.1	279	Ev,Nc,Sm,Ncfr,Nclo,Smfr,Smlo,	LCORL,ligand-dependent nuclear receptor corepressor-like protein isoform X1
hum:NP_000060.2	1873	Susscr4EVm000316t5	1885	ncbi:XP_020920163.1	1877	ENSSSCP00000049504.1	1894	EQ,Ev,Nc,na	CACNA1S,voltage-dependent L-type calcium channel subunit alpha-1S
hum:NP_001185688.1	1873	Susscr4EVm000625t1	1668	ncbi:NP_001171875.1	1664	ENSSSCP00000019434.3	1664	EQ,Nc,Sm,na	LY75,LY75-CD302 fusion protein isoform 1 precursor
hum:XP_005266304.1	1873	Susscr4EVm000451t3	1906	ncbi:XP_020921282.1	1906	ENSSSCP00000044522.1	1024	EQ,Nc,Sm,Smfr,Smlo,	AKAP11,A-kinase anchor protein 11 isoform X2
hum:NP_620278.1	1872	Susscr4EVm000471t1	1927	ncbi:XP_020935609.1	1927	ENSSSCP00000044827.1	1745	EQ,Nc,Sm,na	TAF1,transcription initiation factor TFIID subunit 1 isoform 2
hum:XP_005269704.1	1872	Susscr4EVm000501t1	1878	ncbi:XP_020929141.1	1878	ENSSSCP00000034692.1	1878	EQ,Nc,Sm,na	PDCD11,protein RRP5 homolog isoform X1
hum:XP_011530462.1	1871	Susscr4EVm000487t3	1913	ncbi:XP_003482466.3	1888	ENSSSCP00000047399.1	1894	Ev,Sm,Nc,na	SHROOM3,protein Shroom3 isoform X5
hum:XP_011531267.1	1871	Susscr4EVm000388t14	1904	ncbi:XP_020943178.1	1874	ENSSSCP00000008970.3	1874	Ev,Nc,Sm,na	CCDC88A,girdin isoform X7
hum:XP_011534492.1	1871	Susscr4EVm000481t3	1454	ncbi:XP_020926200.1	516	ENSSSCP00000004378.3	1922	Sm,Ev,Nc,Evlo,Ncfr,Nclo,	FNDC1,fibronectin type III domain-containing protein 1 isoform X1
hum:XP_011539361.1	1870	Susscr4EVm000523t4	1887	ncbi:XP_020952383.1	1877	ENSSSCP00000004228.3	1642	Ev,Nc,Sm,Smlo,	MAST2,microtubule-associated serine/threonine-protein kinase 2 isoform X1
hum:XP_006713073.1	1869	Susscr4EVm000412t1	1857	ncbi:XP_020934941.1	1856	ENSSSCP00000051371.1	1872	Sm,Ev,Nc,na	DOCK3,dedicator of cytokinesis protein 3 isoform X10
hum:XP_011531007.1	1869	Susscr4EVm000503t1	1869	ncbi:XP_003125198.5	1869	ENSSSCP00000044608.1	1869	EQ,Nc,Sm,na	PSME4,proteasome activator complex subunit 4 isoform X1
hum:XP_016859513.1	1869	Susscr4EVm000653t5	876	ncbi:XP_020920528.1	875	ENSSSCP00000033068.1	875	EQ,Nc,Sm,na	ANKRD36,ankyrin repeat domain-containing protein 36A isoform X16
hum:NP_001307803.1	1867	Susscr4EVm000044t6	1885	ncbi:XP_005671069.2	1773	ENSSSCP00000030962.2	1884	EQ,Sm,Nc,na	ANK3,ankyrin-3 isoform 5
hum:NP_115582.4	1866	Susscr4EVm000522t1	1884	ncbi:XP_020948868.1	1908	ENSSSCP00000049761.1	1873	Nc,Ev,Sm,na	NLRC5,protein NLRC5 isoform 1
hum:XP_024306001.1	1863	Susscr4EVm000428t5	1993	ncbi:XP_020936974.1	2036	ENSSSCP00000058109.1	1983	Nc,Ev,Sm,na	TNRC6A,trinucleotide repeat-containing gene 6A protein isoform X8
hum:XP_024303915.1	1862	Susscr4EVm000271t23	1895	ncbi:XP_005668150.2	1868	ENSSSCP00000055534.1	1868	Ev,Nc,Sm,na	SVIL,supervillin isoform X11
hum:NP_001191332.1	1861	Susscr4EVm000044t21	1870	ncbi:XP_005671069.2	1737	ENSSSCP00000030962.2	1848	Ev,Sm,Nc,na	ANK3,ankyrin-3 isoform 3
hum:XP_011532296.1	1861	Susscr4EVm000403t3	1881	ncbi:XP_020927335.1	1881	ENSSSCP00000018312.3	1831	EQ,Nc,Sm,na	SCN10A,sodium channel protein type 10 subunit alpha isoform X3
hum:NP_116277.2	1860	Susscr4EVm000511t5	1896	ncbi:XP_013849239.2	1865	ENSSSCP00000005883.3	1865	Ev,Nc,Sm,na	COL27A1,collagen alpha-1(XXVII) chain preproprotein
hum:XP_016857029.1	1859	Susscr4EVm000431t2	1729	ncbi:XP_020950985.1	1395	ENSSSCP00000042747.1	1395	Ev,Nc,Sm,Nclo,Smlo,	CASZ1,zinc finger protein castor homolog 1 isoform X2
hum:NP_061152.3	1858	Susscr4EVm000519t1	1859	ncbi:XP_013835277.2	1859	ENSSSCP00000041987.1	1859	EQ,Nc,Sm,na	KMT2E,histone-lysine N-methyltransferase 2E
hum:XP_011517440.1	1858	Susscr4EVm000511t5	1875	ncbi:XP_020923527.1	1863	ENSSSCP00000005883.3	1844	Ev,Nc,Sm,na	COL27A1,collagen alpha-1(XXVII) chain isoform X1
hum:XP_016859603.1	1858	Susscr4EVm000429t3	1856	ncbi:XP_013839900.1	1926	ENSSSCP00000032550.1	1929	EQ,Nc,Ev,na	MAP2,microtubule-associated protein 2 isoform X5
hum:NP_004749.2	1857	Susscr4EVm000937t6	1445	ncbi:XP_020922932.1	1877	ENSSSCP00000030467.2	1860	Nc,Sm,Ev,Evlo,	TSPOAP1,peripheral-type benzodiazepine receptor-associated protein 1 isoform a
hum:XP_016855823.1	1857	Susscr4EVm000512t32	1893	ncbi:XP_001929407.6	1857	ENSSSCP00000006161.3	1861	Ev,Sm,Nc,na	COL11A1,collagen alpha-1(XI) chain isoform X1
hum:XP_016881233.1	1856	Susscr4EVm000085t14	1969	ncbi:XP_020940122.1	1973	ENSSSCP00000042818.1	1955	EQ,Ev,Sm,na	LAMA3,laminin subunit alpha-3 isoform X7
hum:XP_006712333.2	1855	Susscr4EVm000483t2	1904	ncbi:XP_020932162.1	1904	ENSSSCP00000016892.3	1763	EQ,Nc,Sm,na	UBR3,E3 ubiquitin-protein ligase UBR3 isoform X5
hum:XP_016871621.1	1855	Susscr4EVm000044t6	1885	ncbi:XP_020933972.1	1676	ENSSSCP00000030962.2	1884	EQ,Sm,Nc,Nclo,	ANK3,ankyrin-3 isoform X41
hum:XP_024309302.1	1855	Susscr4EVm000408t8	1941	ncbi:XP_020925895.1	1923	ENSSSCP00000054056.1	1923	Ev,Nc,Sm,na	MYLK,myosin light chain kinase, smooth muscle isoform X5
hum:NP_001157968.1	1854	Susscr4EVm000529t1	1851	ncbi:XP_020926019.1	1851	ENSSSCP00000041741.1	471	EQ,Nc,Sm,Smfr,Smlo,	CFAP44,cilia- and flagella-associated protein 44 isoform 1
hum:XP_011542964.1	1854	Susscr4EVm000438t3	1905	ncbi:XP_020932292.1	1857	ENSSSCP00000044369.1	1857	Ev,Nc,Sm,na	DOCK5,dedicator of cytokinesis protein 5 isoform X2
hum:XP_005255918.3	1852	Susscr4EVm000395t8	1863	ncbi:XP_020949371.1	1535	ENSSSCP00000032867.1	1131	Ev,Nc,Sm,Nclo,Smfr,Smlo,	GSE1,genetic suppressor element 1 isoform X3
hum:XP_011519913.2	1852	Susscr4EVm000497t1	1876	ncbi:XP_001926803.5	1876	ENSSSCP00000004979.3	1876	EQ,Nc,Sm,na	MYO5A,unconventional myosin-Va isoform X8
hum:XP_011512730.1	1851	Susscr4EVm000191t105	1884	ncbi:XP_020954395.1	1868	ENSSSCP00000051035.1	1842	Ev,Nc,Sm,na	CUL9,cullin-9 isoform X7
hum:XP_024308837.1	1851	Susscr4EVm000450t7	1811	ncbi:XP_020930866.1	1787	ENSSSCP00000026158.3	1382	Ev,Nc,Sm,Smlo,	TNS1,tensin-1 isoform X2
hum:NP_001341185.1	1850	Susscr4EVm000446t8	1924	ncbi:XP_020933972.1	1590	ENSSSCP00000042184.1	1917	EQ,Sm,Nc,Nclo,	ANK2,ankyrin-2 isoform 25
hum:XP_011528856.1	1850	Susscr4EVm000108t18	1884	ncbi:XP_020945744.1	1866	ENSSSCP00000042291.1	1865	Ev,Nc,Sm,na	CELSR1,cadherin EGF LAG seven-pass G-type receptor 1 isoform X3
hum:NP_003963.1	1849	Susscr4EVm000505t7	1872	ncbi:XP_003359339.2	1849	ENSSSCP00000042778.1	1849	Ev,Nc,Sm,na	BTAF1,TATA-binding protein-associated factor 172
hum:NP_006412.2	1849	Susscr4EVm000554t1	1877	ncbi:XP_001928045.1	1849	ENSSSCP00000006612.3	1849	Ev,Nc,Sm,na	ARFGEF1,brefeldin A-inhibited guanine nucleotide-exchange protein 1
hum:NP_036441.2	1849	Susscr4EVm000513t1	1853	ncbi:XP_020938304.1	1853	ENSSSCP00000024058.2	1171	EQ,Nc,Sm,Smfr,Smlo,	SHANK2,SH3 and multiple ankyrin repeat domains protein 2 isoform 1
hum:XP_016878920.1	1848	Susscr4EVm000823t1	1479	ncbi:XP_020942162.1	1831	ENSSSCP00000039172.1	1833	EQ,Nc,Ev,Evlo,	DNAH3,dynein heavy chain 3, axonemal isoform X10
hum:NP_001293018.1	1847	Susscr4EVm000490t1	1899	ncbi:XP_020954691.1	1899	ENSSSCP00000052976.1	1899	EQ,Nc,Sm,na	ZNF236,zinc finger protein 236 isoform 1
hum:XP_011542759.1	1847	Susscr4EVm000515t1	1898	ncbi:XP_020955878.1	1701	ENSSSCP00000010342.3	1851	Ev,Sm,Nc,Nclo,	KIF13B,kinesin-like protein KIF13B isoform X1
hum:XP_005249555.1	1846	Susscr4EVm000359t1	1903	ncbi:XP_013833045.1	1884	ENSSSCP00000029389.2	1872	Ev,Nc,Sm,na	MDC1,mediator of DNA damage checkpoint protein 1 isoform X8
hum:XP_011523571.1	1845	Susscr4EVm000486t1	1918	ncbi:XP_020923115.1	1910	ENSSSCP00000054688.1	1910	EQ,Nc,Sm,na	ATAD5,ATPase family AAA domain-containing protein 5 isoform X1
hum:XP_011542608.1	1845	Susscr4EVm000552t9	1856	ncbi:XP_020920089.1	1850	ENSSSCP00000050793.1	1848	EQ,Nc,Sm,na	CDC42BPA,serine/threonine-protein kinase MRCK alpha isoform X1
hum:XP_011543327.1	1844	Susscr4EVm000269t5	1967	ncbi:XP_020955083.1	1966	ENSSSCP00000013807.3	1835	EQ,Nc,Sm,na	PCNX3,pecanex-like protein 3 isoform X4
hum:NP_919269.2	1843	Susscr4EVm000498t1	1851	ncbi:NP_001137400.1	1850	ENSSSCP00000043657.1	848	EQ,Nc,Sm,Smfr,Smlo,	XIRP1,xin actin-binding repeat-containing protein 1 isoform 1
hum:NP_055852.2	1842	Susscr4EVm000484t7	1861	ncbi:XP_003483548.2	1842	ENSSSCP00000010990.3	1842	Ev,Nc,Sm,na	ZSWIM8,zinc finger SWIM domain-containing protein 8 isoform 1
hum:XP_005251908.1	1839	Susscr4EVm000507t5	1843	ncbi:XP_020923129.1	1843	ENSSSCP00000038335.1	1843	EQ,Nc,Sm,na	ECPAS,proteasome-associated protein ECM29 homolog isoform X2
hum:XP_005251911.1	1839	Susscr4EVm000507t3	1843	ncbi:XP_020923123.1	1843	ENSSSCP00000005855.3	1843	EQ,Nc,Sm,na	ECPAS,proteasome-associated protein ECM29 homolog isoform X3
hum:XP_016869820.1	1839	Susscr4EVm000360t1	1828	ncbi:XP_003121963.3	1822	ENSSSCP00000005595.3	1822	EQ,Nc,Sm,na	KIAA2026,uncharacterized protein KIAA2026 isoform X2
hum:NP_000084.3	1838	Susscr4EVm000549t1	1860	ncbi:XP_001929407.6	1842	ENSSSCP00000006161.3	1841	Ev,Nc,Sm,na	COL5A1,collagen alpha-1(V) chain isoform 1 preproprotein
hum:XP_016878512.1	1838	Susscr4EVm000538t1	1874	ncbi:XP_020942559.1	1908	ENSSSCP00000022115.2	1852	Nc,Ev,Sm,na	WDR90,WD repeat-containing protein 90 isoform X1
hum:XP_005252030.1	1837	Susscr4EVm000242t6	1837	ncbi:XP_020953993.1	1835	ENSSSCP00000043968.1	1837	EQ,Sm,Nc,na	TNC,tenascin isoform X11
hum:NP_000325.4	1836	Susscr4EVm000403t14	1859	ncbi:XP_003131332.1	1843	ENSSSCP00000018312.3	1843	Ev,Nc,Sm,na	SCN4A,sodium channel protein type 4 subunit alpha
hum:NP_689854.2	1835	Susscr4EVm000526t1	1851	ncbi:XP_020948646.1	1836	ENSSSCP00000057286.1	1010	Ev,Nc,Sm,Smfr,Smlo,	ARID2,AT-rich interactive domain-containing protein 2 isoform 1
hum:XP_016873861.1	1835	Susscr4EVm000419t4	1886	ncbi:XP_013849424.1	1886	ENSSSCP00000035622.1	1874	EQ,Nc,Sm,na	SBF2,myotubularin-related protein 13 isoform X4
hum:NP_115820.2	1834	Susscr4EVm000571t1	1833	ncbi:XP_013851158.2	1813	ENSSSCP00000037868.1	1813	Ev,Nc,Sm,na	SLX4,structure-specific endonuclease subunit SLX4
hum:NP_055514.3	1832	Susscr4EVm000528t1	1871	ncbi:XP_003124523.1	1850	ENSSSCP00000038859.1	1850	Ev,Nc,Sm,na	ZNF646,zinc finger protein 646
hum:XP_016866367.1	1832	Susscr4EVm000506t12	1845	ncbi:XP_020941490.1	1833	ENSSSCP00000032558.1	1613	Ev,Nc,Sm,Smlo,	AFDN,afadin isoform X1
hum:NP_004937.1	1830	Susscr4EVm000544t1	1830	ncbi:XP_020932292.1	1830	ENSSSCP00000044369.1	1830	EQ,Nc,Sm,na	DOCK2,dedicator of cytokinesis protein 2
hum:XP_024303916.1	1830	Susscr4EVm000271t19	1868	ncbi:XP_020920432.1	1868	ENSSSCP00000059351.1	1841	EQ,Nc,Sm,na	SVIL,supervillin isoform X12
hum:NP_001262.3	1828	Susscr4EVm000504t1	1873	ncbi:XP_001926393.4	1828	ENSSSCP00000038818.1	1828	Ev,Nc,Sm,na	CHD2,chromodomain-helicase-DNA-binding protein 2 isoform 1
hum:XP_011516365.1	1828	Susscr4EVm000594t1	1747	ncbi:XP_020929919.1	1781	ENSSSCP00000041180.1	1741	Nc,Ev,Sm,na	ADAMTSL1,ADAMTS-like protein 1 isoform X1
hum:XP_016870341.1	1828	Susscr4EVm000539t1	1863	ncbi:XP_020918754.1	1832	ENSSSCP00000041592.1	1832	Ev,Nc,Sm,na	FOCAD,focadhesin isoform X1
hum:NP_001032.2	1827	Susscr4EVm000356t2	1862	ncbi:XP_020934755.1	1838	ENSSSCP00000032982.1	1838	Ev,Nc,Sm,na	SI,sucrase-isomaltase, intestinal
hum:NP_002365.3	1827	Susscr4EVm000429t2	1856	ncbi:XP_013839900.1	1926	ENSSSCP00000032550.1	1897	Nc,Sm,Ev,na	MAP2,microtubule-associated protein 2 isoform 1
hum:XP_016868268.1	1827	Susscr4EVm000378t1	1941	ncbi:XP_020925023.1	1965	ENSSSCP00000012355.3	1940	Nc,Ev,Sm,na	PLXNA4,plexin-A4 isoform X2
hum:XP_011542760.1	1826	Susscr4EVm000515t1	1887	ncbi:XP_020955881.1	1684	ENSSSCP00000010342.3	1839	Ev,Sm,Nc,Nclo,	KIF13B,kinesin-like protein KIF13B isoform X2
hum:XP_016859187.1	1826	Susscr4EVm000005t44	1857	ncbi:XP_020931959.1	1845	ENSSSCP00000052588.1	1819	Ev,Nc,Sm,na	OBSL1,obscurin-like protein 1 isoform X4
hum:XP_016859188.1	1826	Susscr4EVm000472t1	1850	ncbi:XP_020931959.1	1850	ENSSSCP00000052588.1	1824	EQ,Nc,Sm,na	OBSL1,obscurin-like protein 1 isoform X5
hum:XP_373030.5	1826	Susscr4EVm000569t1	1814	ncbi:XP_020957387.1	1808	ENSSSCP00000037681.1	1663	EQ,Nc,Sm,na	C4orf54,uncharacterized protein LOC285556 isoform X1
hum:XP_011520938.1	1825	Susscr4EVm000542t1	1835	ncbi:XP_020942433.1	1876	ENSSSCP00000038788.1	1835	Nc,Ev,Sm,na	TSC2,tuberin isoform X1
hum:XP_005266306.1	1824	Susscr4EVm000451t87	1852	ncbi:XP_020921282.1	1794	ENSSSCP00000044522.1	912	Ev,Nc,Sm,Smfr,Smlo,	AKAP11,A-kinase anchor protein 11 isoform X4
hum:NP_001098676.2	1823	Susscr4EVm000057t30	1946	ncbi:XP_020933876.1	1945	ENSSSCP00000042415.1	1936	EQ,Nc,Sm,na	LAMA4,laminin subunit alpha-4 isoform 1 precursor
hum:XP_005273222.1	1823	Susscr4EVm000327t4	1855	ncbi:XP_020926283.1	1845	ENSSSCP00000012099.3	1845	Ev,Nc,Sm,na	PLXNA2,plexin-A2 isoform X2
hum:NP_000419.1	1821	Susscr4EVm000592t4	1834	ncbi:XP_005656461.1	1827	ENSSSCP00000002566.3	1827	EQ,Nc,Sm,na	LTBP2,latent-transforming growth factor beta-binding protein 2 precursor
hum:NP_060404.4	1821	Susscr4EVm000499t2	1822	ncbi:XP_020947836.1	1822	ENSSSCP00000004824.3	1822	EQ,Nc,Sm,na	PHIP,PH-interacting protein
hum:NP_001161693.1	1820	Susscr4EVm003426t1	827	ncbi:XP_020931362.1	496	ENSSSCP00000017065.3	270	Ev,Nc,Sm,Ncfr,Nclo,Smfr,Smlo,	C2CD6,C2 calcium-dependent domain-containing protein 6 isoform 1
hum:NP_001271188.1	1820	Susscr4EVm000525t8	1855	ncbi:XP_020928277.1	1856	ENSSSCP00000048863.1	1852	EQ,Ev,Sm,na	KIF20B,kinesin-like protein KIF20B isoform 1
hum:NP_001310529.1	1820	Susscr4EVm000271t21	1875	ncbi:XP_020920432.1	1868	ENSSSCP00000055534.1	1842	EQ,Nc,Sm,na	SVIL,supervillin isoform 4
hum:XP_005263220.1	1820	Susscr4EVm000487t5	1892	ncbi:XP_003482466.3	1863	ENSSSCP00000047399.1	1852	Ev,Nc,Sm,na	SHROOM3,protein Shroom3 isoform X6
hum:XP_006710862.1	1820	Susscr4EVm000433t1	1888	ncbi:XP_020952516.1	1885	ENSSSCP00000023142.2	1841	EQ,Nc,Sm,na	PTPRF,receptor-type tyrosine-protein phosphatase F isoform X8
hum:NP_065194.2	1819	Susscr4EVm000660t1	1831	ncbi:XP_020946990.1	683	ENSSSCP00000001040.3	1203	Ev,Sm,Nc,Smfr,Smlo,Ncfr,Nclo,	TUBGCP6,gamma-tubulin complex component 6
hum:XP_005254649.1	1819	Susscr4EVm000454t13	1543	ncbi:XP_005659765.1	1256	ENSSSCP00000050556.1	1783	Sm,Ev,Nc,Evlo,Nclo,	ZNF106,zinc finger protein 106 isoform X3
hum:XP_016863062.1	1819	Susscr4EVm000122t3	1812	ncbi:XP_020927314.1	1814	ENSSSCP00000011987.3	1757	EQ,Ev,Sm,na	TRANK1,TPR and ankyrin repeat-containing protein 1 isoform X5
hum:NP_542196.2	1818	Susscr4EVm000512t32	1867	ncbi:NP_001014971.1	1821	ENSSSCP00000006161.3	1835	Ev,Sm,Nc,na	COL11A1,collagen alpha-1(XI) chain isoform B preproprotein
hum:XP_016866372.1	1817	Susscr4EVm000506t10	1833	ncbi:XP_020941490.1	1833	ENSSSCP00000032558.1	1613	EQ,Nc,Sm,Smlo,	AFDN,afadin isoform X9
hum:XP_016882990.1	1815	Susscr4EVm000049t2	1848	ncbi:XP_020940777.1	1848	ENSSSCP00000014575.3	254	EQ,Nc,Sm,Smfr,Smlo,	MUC16,mucin-16 isoform X13
hum:NP_001011649.1	1814	Susscr4EVm000443t4	1885	ncbi:XP_020923763.1	1832	ENSSSCP00000024746.2	878	Ev,Nc,Sm,Smfr,Smlo,	CDK5RAP2,CDK5 regulatory subunit-associated protein 2 isoform b
hum:XP_016860338.1	1814	Susscr4EVm000089t16	1659	ncbi:XP_020942765.1	1661	ENSSSCP00000008687.3	1659	EQ,Ev,Sm,na	RGPD2,RANBP2-like and GRIP domain-containing protein 2 isoform X5
hum:XP_016859532.1	1813	Susscr4EVm000653t24	895	ncbi:XP_020933855.1	848	ENSSSCP00000033068.1	825	Ev,Nc,Sm,na	ANKRD36,ankyrin repeat domain-containing protein 36A isoform X33
hum:NP_056311.2	1812	Susscr4EVm000560t2	1812	ncbi:XP_020944755.1	1812	ENSSSCP00000006511.3	1812	EQ,Nc,Sm,na	VIRMA,protein virilizer homolog isoform 1
hum:NP_056380.2	1812	Susscr4EVm000579t4	1791	ncbi:XP_013838006.1	1766	ENSSSCP00000020792.1	1766	Ev,Nc,Sm,na	LTN1,E3 ubiquitin-protein ligase listerin isoform 1
hum:XP_011508403.1	1812	Susscr4EVm000320t2	1892	ncbi:XP_020920170.1	1877	ENSSSCP00000056377.1	1877	Ev,Nc,Sm,na	NAV1,neuron navigator 1 isoform X6
hum:XP_011530984.1	1811	Susscr4EVm000574t1	1814	ncbi:XP_020943024.1	1814	ENSSSCP00000008852.3	1679	EQ,Nc,Sm,na	TET3,methylcytosine dioxygenase TET3 isoform X1
hum:XP_016860328.1	1811	Susscr4EVm000089t1	1631	ncbi:XP_005662394.2	1631	ENSSSCP00000024971.2	1631	EQ,Nc,Sm,na	RGPD6,RANBP2-like and GRIP domain-containing protein 5/6 isoform X1
hum:NP_115804.1	1810	Susscr4EVm000719t1	1642	ncbi:XP_020935847.1	1777	ENSSSCP00000057034.1	1777	EQ,Sm,Ev,na	FRMPD3,FERM and PDZ domain-containing protein 3
hum:XP_016867690.1	1810	Susscr4EVm000576t1	1792	ncbi:XP_020919181.1	1798	ENSSSCP00000041616.1	1789	EQ,Ev,Sm,na	LAMB1,laminin subunit beta-1 isoform X1
hum:XP_011508404.1	1809	Susscr4EVm000320t15	1869	ncbi:XP_020920171.1	1869	ENSSSCP00000029220.2	1866	EQ,Nc,Sm,na	NAV1,neuron navigator 1 isoform X7
hum:XP_005255769.1	1808	Susscr4EVm000528t4	1834	ncbi:XP_005655132.1	1824	ENSSSCP00000021928.2	1824	Ev,Nc,Sm,na	ZNF646,zinc finger protein 646 isoform X2
hum:XP_011523053.1	1807	Susscr4EVm000509t6	1816	ncbi:XP_020922281.1	1696	ENSSSCP00000029678.2	1386	Ev,Nc,Sm,Smlo,	ITGB4,integrin beta-4 isoform X5
hum:XP_011538646.1	1807	Susscr4EVm000469t3	1804	ncbi:XP_020929899.1	1797	ENSSSCP00000021475.2	1797	EQ,Nc,Sm,na	DLG5,disks large homolog 5 isoform X6
hum:NP_001138678.1	1806	Susscr4EVm000546t1	1845	ncbi:XP_020928975.1	1839	ENSSSCP00000041646.1	1158	EQ,Nc,Sm,Smfr,Smlo,	KIAA1671,uncharacterized protein KIAA1671
hum:NP_001311249.1	1805	Susscr4EVm000523t3	1859	ncbi:XP_020952383.1	1877	ENSSSCP00000004228.3	1659	Nc,Ev,Sm,Smlo,	MAST2,microtubule-associated serine/threonine-protein kinase 2 isoform 3
hum:NP_071396.4	1805	Susscr4EVm000492t4	1841	ncbi:XP_020955875.1	1845	ENSSSCP00000022840.2	1834	EQ,Ev,Sm,na	KIF13A,kinesin-like protein KIF13A isoform a
hum:NP_001341214.1	1804	Susscr4EVm000567t12	1829	ncbi:XP_020929489.1	1828	ENSSSCP00000010847.3	1828	EQ,Nc,Sm,na	SIPA1L1,signal-induced proliferation-associated 1-like protein 1 isoform 1
hum:NP_694984.4	1802	Susscr4EVm000530t1	1847	ncbi:XP_020936422.1	1802	ENSSSCP00000048118.1	1802	Ev,Nc,Sm,na	BRWD3,bromodomain and WD repeat-containing protein 3
hum:XP_016873864.1	1802	Susscr4EVm000444t1	1881	ncbi:XP_005661188.2	1881	ENSSSCP00000033035.1	1881	EQ,Nc,Sm,na	SBF2,myotubularin-related protein 13 isoform X6
hum:NP_060024.2	1801	Susscr4EVm000564t1	1803	ncbi:XP_020925918.1	1804	ENSSSCP00000031207.1	1803	EQ,Ev,Sm,na	PARP14,poly [ADP-ribose] polymerase 14
hum:NP_057404.2	1800	Susscr4EVm000531t7	1818	ncbi:XP_020918086.1	1799	ENSSSCP00000015713.3	1644	Ev,Nc,Sm,na	NUP98,nuclear pore complex protein Nup98-Nup96 isoform 1 proprotein
hum:NP_065973.2	1800	Susscr4EVm000615t1	1805	ncbi:XP_013841640.1	1806	ENSSSCP00000013125.3	1805	EQ,Ev,Sm,na	WNK3,serine/threonine-protein kinase WNK3 isoform 1
hum:XP_005251193.1	1800	Susscr4EVm000554t1	1833	ncbi:XP_003484029.1	1801	ENSSSCP00000006612.3	1797	Ev,Nc,Sm,na	ARFGEF1,brefeldin A-inhibited guanine nucleotide-exchange protein 1 isoform X3
hum:NP_002283.3	1798	Susscr4EVm000496t2	1824	ncbi:XP_020926319.1	1801	ENSSSCP00000044053.1	1803	Ev,Sm,Nc,na	LAMB2,laminin subunit beta-2 precursor
hum:XP_005271923.1	1798	Susscr4EVm000504t2	1801	ncbi:XP_013833723.1	1808	ENSSSCP00000038818.1	1801	EQ,Ev,Sm,na	CHD1,chromodomain-helicase-DNA-binding protein 1 isoform X1
hum:XP_016878013.1	1798	Susscr4EVm000517t1	1788	ncbi:XP_020954486.1	1788	ENSSSCP00000054972.1	1778	EQ,Nc,Sm,na	TJP1,tight junction protein ZO-1 isoform X5
hum:XP_006711898.1	1797	Susscr4EVm000552t1	1819	ncbi:XP_020920089.1	1850	ENSSSCP00000036649.1	1847	EQ,Sm,Ev,na	CDC42BPA,serine/threonine-protein kinase MRCK alpha isoform X6
hum:XP_011531270.1	1797	Susscr4EVm000414t1	1786	ncbi:XP_020943178.1	1751	ENSSSCP00000038953.1	1839	Sm,Ev,Nc,na	CCDC88A,girdin isoform X10
hum:XP_016866677.1	1797	Susscr4EVm000492t3	1837	ncbi:XP_020955875.1	1851	ENSSSCP00000022840.2	1840	Nc,Sm,Ev,na	KIF13A,kinesin-like protein KIF13A isoform X1
hum:NP_066933.1	1796	Susscr4EVm000533t2	1841	ncbi:XP_005662937.1	1797	ENSSSCP00000031041.2	1770	Ev,Nc,Sm,na	COL14A1,collagen alpha-1(XIV) chain precursor
hum:XP_011510891.1	1795	Susscr4EVm000466t6	1836	ncbi:XP_020946936.1	1878	ENSSSCP00000031431.1	1834	Nc,Ev,Sm,na	PLXND1,plexin-D1 isoform X2
hum:XP_016867022.1	1795	Susscr4EVm000191t139	1792	ncbi:XP_020954391.1	1761	ENSSSCP00000056343.1	1758	Ev,Nc,Sm,na	CUL7,cullin-7 isoform X1
hum:XP_016871625.1	1795	Susscr4EVm000044t5	1798	ncbi:XP_005671069.2	1794	ENSSSCP00000030962.2	1803	EQ,Ev,Nc,na	ANK3,ankyrin-3 isoform X43
hum:XP_016879106.1	1795	Susscr4EVm000542t5	1803	ncbi:XP_003354719.1	1817	ENSSSCP00000038788.1	1803	Nc,Ev,Sm,na	TSC2,tuberin isoform X11
hum:XP_005273377.1	1794	Susscr4EVm000552t14	1819	ncbi:XP_020920089.1	1850	ENSSSCP00000036649.1	1847	EQ,Sm,Ev,na	CDC42BPA,serine/threonine-protein kinase MRCK alpha isoform X7
hum:XP_005247338.1	1793	Susscr4EVm000669t2	1813	ncbi:XP_020926204.1	1822	ENSSSCP00000012740.3	736	EQ,Ev,Sm,Smfr,Smlo,	ABI3BP,target of Nesh-SH3 isoform X1
hum:NP_008841.2	1792	Susscr4EVm000565t2	1799	ncbi:XP_020937007.1	1837	ENSSSCP00000039311.1	1799	Nc,Ev,Sm,na	RBBP6,E3 ubiquitin-protein ligase RBBP6 isoform 1
hum:XP_011510924.1	1792	Susscr4EVm000082t3	1779	ncbi:XP_020931400.1	1780	ENSSSCP00000043192.1	1721	EQ,Ev,Sm,na	COL6A5,collagen alpha-5(VI) chain isoform X2
hum:XP_016868817.1	1792	Susscr4EVm000446t17	1671	ncbi:XP_020933972.1	1599	ENSSSCP00000010888.3	1667	EQ,Sm,Nc,na	ANK1,ankyrin-1 isoform X20
hum:NP_001230937.1	1791	Susscr4EVm000524t1	1850	ncbi:XP_020950972.1	1850	ENSSSCP00000053462.1	1850	EQ,Nc,Sm,na	KIF1A,kinesin-like protein KIF1A isoform 1
hum:NP_001336182.1	1791	Susscr4EVm000403t12	1847	ncbi:XP_003131332.1	1847	ENSSSCP00000018312.3	1847	EQ,Nc,Sm,na	SCN11A,sodium channel protein type 11 subunit alpha
hum:NP_064714.2	1791	Susscr4EVm000580t1	1792	ncbi:XP_003130378.3	1792	ENSSSCP00000016447.3	1792	EQ,Nc,Sm,na	PAPPA2,pappalysin-2 isoform 1 precursor
hum:XP_011542805.1	1791	Susscr4EVm000446t1	1673	ncbi:XP_020956362.1	1631	ENSSSCP00000010888.3	1667	EQ,Sm,Nc,na	ANK1,ankyrin-1 isoform X21
hum:XP_016860640.1	1791	Susscr4EVm000518t1	1576	ncbi:XP_020930426.1	1794	ENSSSCP00000050389.1	1794	EQ,Sm,Ev,Evlo,	TANC1,protein TANC1 isoform X13
hum:NP_001136241.1	1790	Susscr4EVm000365t29	1538	ncbi:XP_020929194.1	1834	ENSSSCP00000011114.3	1406	Nc,Ev,Sm,Evlo,Smlo,	PCDH15,protocadherin-15 isoform CD2-1 precursor
hum:XP_016878014.1	1789	Susscr4EVm000517t14	1822	ncbi:XP_020954502.1	1783	ENSSSCP00000054972.1	1783	Ev,Nc,Sm,na	TJP1,tight junction protein ZO-1 isoform X6
hum:XP_011512125.1	1788	Susscr4EVm000508t1	1770	ncbi:XP_020955952.1	985	ENSSSCP00000056526.1	161	Ev,Nc,Sm,Ncfr,Nclo,Smmi,Smlo,	LCORL,ligand-dependent nuclear receptor corepressor-like protein isoform X4
hum:NP_002282.2	1786	Susscr4EVm000576t2	1786	ncbi:XP_020919181.1	1798	ENSSSCP00000041616.1	1789	EQ,Sm,Ev,na	LAMB1,laminin subunit beta-1 precursor
hum:XP_005274689.2	1786	Susscr4EVm001203t1	1311	ncbi:XP_020936282.1	1751	ENSSSCP00000058841.1	1309	Nc,Ev,Sm,Evlo,Smlo,	FRMPD4,FERM and PDZ domain-containing protein 4 isoform X1
hum:XP_024304238.1	1786	Susscr4EVm000583t1	1770	ncbi:XP_013849925.2	1816	ENSSSCP00000014158.3	1178	Nc,Ev,Sm,Smfr,Smlo,	DCDC1,doublecortin domain-containing protein 1 isoform X1
hum:XP_024305104.1	1786	Susscr4EVm000618t1	1767	ncbi:XP_020921537.1	1767	ENSSSCP00000032572.1	1767	EQ,Nc,Sm,na	NALCN,sodium leak channel non-selective protein isoform X5
hum:NP_001171701.1	1785	Susscr4EVm000572t1	1803	ncbi:XP_013841875.1	1790	ENSSSCP00000013454.2	1790	Ev,Nc,Sm,na	BCORL1,BCL-6 corepressor-like protein 1 1a
hum:NP_004397.2	1785	Susscr4EVm001776t12	1104	ncbi:XP_020929376.1	1532	ENSSSCP00000003229.3	1233	Nc,Sm,Ev,Smlo,Evlo,	DMBT1,deleted in malignant brain tumors 1 protein isoform a precursor
hum:NP_006411.2	1785	Susscr4EVm000510t1	1858	ncbi:XP_001928045.1	1840	ENSSSCP00000006612.3	1840	Ev,Nc,Sm,na	ARFGEF2,brefeldin A-inhibited guanine nucleotide-exchange protein 2
hum:XP_016878015.1	1785	Susscr4EVm000517t14	1830	ncbi:XP_020954537.1	1788	ENSSSCP00000043392.1	1787	Ev,Nc,Sm,na	TJP1,tight junction protein ZO-1 isoform X7
hum:XP_011542896.1	1784	Susscr4EVm011513t1	358	ncbi:XP_005671867.2	1812	ENSSSCP00000047140.1	1490	Nc,Sm,Ev,Smlo,Evfr,Evlo,	TEX15,testis-expressed protein 15 isoform X4
hum:XP_016866679.1	1784	Susscr4EVm000492t1	1841	ncbi:XP_020955875.1	1845	ENSSSCP00000022840.2	1810	EQ,Ev,Sm,na	KIF13A,kinesin-like protein KIF13A isoform X3
hum:NP_001271174.1	1783	Susscr4EVm000562t1	1845	ncbi:XP_020949989.1	1843	ENSSSCP00000056315.1	1827	EQ,Nc,Sm,na	SIPA1L1,signal-induced proliferation-associated 1-like protein 1 isoform 2
hum:XP_011513490.1	1783	Susscr4EVm000348t1	1792	ncbi:XP_020943639.1	1792	ENSSSCP00000008091.3	1751	EQ,Nc,Sm,na	SDK1,protein sidekick-1 isoform X4
hum:XP_011542610.1	1783	Susscr4EVm000552t13	1850	ncbi:XP_020920089.1	1850	ENSSSCP00000036649.1	1847	EQ,Nc,Sm,na	CDC42BPA,serine/threonine-protein kinase MRCK alpha isoform X8
hum:NP_001161842.1	1782	Susscr4EVm000191t139	1779	ncbi:XP_013833400.2	1745	ENSSSCP00000056343.1	1745	Ev,Nc,Sm,na	CUL7,cullin-7 isoform 1
hum:NP_005091.2	1782	Susscr4EVm000555t1	1792	ncbi:XP_001927300.5	1792	ENSSSCP00000054554.1	1759	EQ,Nc,Sm,na	AKAP12,A-kinase anchor protein 12 isoform 1
hum:XP_011512740.2	1782	Susscr4EVm000602t1	1747	ncbi:XP_020952748.1	1747	ENSSSCP00000033649.1	1747	EQ,Nc,Sm,na	UBR2,E3 ubiquitin-protein ligase UBR2 isoform X1
hum:XP_011520941.1	1782	Susscr4EVm000542t1	1835	ncbi:XP_003354717.1	1835	ENSSSCP00000038788.1	1834	EQ,Nc,Sm,na	TSC2,tuberin isoform X5
hum:NP_001243398.1	1781	Susscr4EVm000376t5	1799	ncbi:XP_005671176.1	1784	ENSSSCP00000043064.1	1787	Ev,Sm,Nc,na	KAT6B,histone acetyltransferase KAT6B isoform 3
hum:NP_001278893.1	1781	Susscr4EVm000506t12	1803	ncbi:XP_013839750.1	1803	ENSSSCP00000004342.3	1571	EQ,Nc,Sm,Smlo,	AFDN,0
hum:NP_055888.1	1781	Susscr4EVm000567t11	1841	ncbi:XP_005656429.1	1840	ENSSSCP00000033710.1	1840	EQ,Nc,Sm,na	SIPA1L3,signal-induced proliferation-associated 1-like protein 3
hum:XP_011532619.1	1781	Susscr4EVm000725t4	1493	ncbi:XP_020927322.1	1677	ENSSSCP00000011994.3	1677	EQ,Sm,Ev,Evlo,	DLEC1,deleted in lung and esophageal cancer protein 1 isoform X1
hum:NP_057279.2	1780	Susscr4EVm000525t2	1852	ncbi:XP_020928277.1	1856	ENSSSCP00000011146.3	1829	EQ,Ev,Sm,na	KIF20B,kinesin-like protein KIF20B isoform 2
hum:XP_005251116.1	1780	Susscr4EVm000533t2	1814	ncbi:XP_013851968.1	1781	ENSSSCP00000031041.2	1781	Ev,Nc,Sm,na	COL14A1,collagen alpha-1(XIV) chain isoform X2
hum:XP_005247339.1	1779	Susscr4EVm000669t2	1813	ncbi:XP_020926169.1	1819	ENSSSCP00000012740.3	736	EQ,Ev,Sm,Smfr,Smlo,	ABI3BP,target of Nesh-SH3 isoform X2
hum:XP_011534493.1	1777	Susscr4EVm000481t8	1387	ncbi:XP_005659175.2	747	ENSSSCP00000056913.1	1790	Sm,Ev,Nc,Evlo,Ncfr,Nclo,	FNDC1,fibronectin type III domain-containing protein 1 isoform X2
hum:XP_016884961.1	1776	Susscr4EVm000337t2	1824	ncbi:XP_003135533.2	1219	ENSSSCP00000031011.2	1780	Ev,Sm,Nc,Nclo,	HCFC1,host cell factor 1 isoform X6
hum:NP_714544.1	1775	Susscr4EVm001774t1	1117	ncbi:XP_013848532.1	1756	ENSSSCP00000005067.2	1755	EQ,Sm,Ev,Evfr,Evlo,	STRC,stereocilin precursor
hum:XP_016861594.1	1774	Susscr4EVm000669t2	1794	ncbi:XP_020926188.1	1805	ENSSSCP00000012740.3	736	Nc,Ev,Sm,Smfr,Smlo,	ABI3BP,target of Nesh-SH3 isoform X5
hum:NP_001295049.1	1773	Susscr4EVm000548t1	1831	ncbi:XP_005659977.1	1831	ENSSSCP00000020885.2	1825	EQ,Nc,Sm,na	TOGARAM1,TOG array regulator of axonemal microtubules protein 1 isoform 1
hum:NP_001335658.1	1772	Susscr4EVm000578t1	1780	ncbi:XP_020943536.1	1784	ENSSSCP00000055224.1	1784	EQ,Sm,Ev,na	KIDINS220,kinase D-interacting substrate of 220 kDa isoform 2
hum:XP_011533233.1	1771	Susscr4EVm000292t16	1502	ncbi:XP_020921664.1	1284	ENSSSCP00000022040.2	1502	EQ,Sm,Nc,Nclo,	PARP4,poly [ADP-ribose] polymerase 4 isoform X1
hum:XP_016876616.1	1770	Susscr4EVm000200t1	1768	ncbi:XP_020955055.1	1768	ENSSSCP00000002495.3	1768	EQ,Nc,Sm,na	ZFYVE26,zinc finger FYVE domain-containing protein 26 isoform X4
hum:XP_016879437.1	1769	Susscr4EVm000030t1	685	ncbi:XP_020942270.1	732	ENSSSCP00000008432.2	1671	Sm,Nc,Ev,Ncfr,Nclo,Evfr,Evlo,	LOC400499,putative uncharacterized protein LOC400499 isoform X20
hum:XP_024306181.1	1769	Susscr4EVm000542t1	1823	ncbi:XP_003354719.1	1846	ENSSSCP00000008587.3	1822	Nc,Ev,Sm,na	TSC2,tuberin isoform X7
hum:XP_016873818.1	1768	Susscr4EVm000521t13	1712	ncbi:XP_013849914.1	1670	ENSSSCP00000047798.1	1683	Ev,Sm,Nc,na	QSER1,glutamine and serine-rich protein 1 isoform X3
hum:NP_001177638.1	1767	Susscr4EVm000549t1	1824	ncbi:NP_001014971.1	1814	ENSSSCP00000006161.3	1828	EQ,Ev,Nc,na	COL11A1,collagen alpha-1(XI) chain isoform E preproprotein
hum:XP_011520317.1	1767	Susscr4EVm000407t1	1761	ncbi:XP_020954252.1	1767	ENSSSCP00000031606.1	1767	EQ,Sm,Ev,na	LRRK1,leucine-rich repeat serine/threonine-protein kinase 1 isoform X3
hum:XP_016881160.1	1766	Susscr4EVm000478t24	1732	ncbi:XP_020951725.1	1725	ENSSSCP00000033598.1	1732	EQ,Sm,Nc,na	MTCL1,microtubule cross-linking factor 1 isoform X17
hum:XP_011510947.1	1765	Susscr4EVm000669t1	1807	ncbi:XP_020926188.1	1796	ENSSSCP00000046114.1	665	Ev,Nc,Sm,Smfr,Smlo,	ABI3BP,target of Nesh-SH3 isoform X18
hum:XP_011542611.1	1764	Susscr4EVm000577t4	1867	ncbi:XP_020920080.1	1850	ENSSSCP00000050324.1	1850	Ev,Nc,Sm,na	CDC42BPA,serine/threonine-protein kinase MRCK alpha isoform X11
hum:XP_016876043.1	1764	Susscr4EVm000091t4	1779	ncbi:XP_020957210.1	1780	ENSSSCP00000055655.1	1763	EQ,Ev,Sm,na	FREM2,FRAS1-related extracellular matrix protein 2 isoform X1
hum:XP_024303020.1	1764	Susscr4EVm000617t1	1690	ncbi:XP_020946057.1	1639	ENSSSCP00000056225.1	1613	Ev,Nc,Sm,na	MROH1,maestro heat-like repeat-containing protein family member 1 isoform X1
hum:XP_011510733.1	1763	Susscr4EVm000082t15	1811	ncbi:XP_020931400.1	1803	ENSSSCP00000043192.1	1756	EQ,Nc,Sm,na	COL6A6,collagen alpha-6(VI) chain isoform X4
hum:NP_001035362.3	1762	Susscr4EVm000594t1	1769	ncbi:XP_020929935.1	1763	ENSSSCP00000041180.1	1763	EQ,Nc,Sm,na	ADAMTSL1,ADAMTS-like protein 1 isoform 4 precursor
hum:XP_011541377.1	1762	Susscr4EVm000377t1	1759	ncbi:XP_013835017.2	1759	ENSSSCP00000016160.3	1759	EQ,Nc,Sm,na	ARHGAP32,rho GTPase-activating protein 32 isoform X5
hum:XP_011543915.1	1762	Susscr4EVm001203t1	1310	ncbi:XP_020936281.1	1763	ENSSSCP00000058841.1	1322	Nc,Sm,Ev,Smlo,Evlo,	FRMPD4,FERM and PDZ domain-containing protein 4 isoform X2
hum:NP_057688.2	1761	Susscr4EVm000585t1	1783	ncbi:XP_003480965.2	1769	ENSSSCP00000015245.3	1761	Ev,Nc,Sm,na	KDM3B,lysine-specific demethylase 3B
hum:XP_016884820.1	1761	Susscr4EVm000061t5	1763	ncbi:XP_020935202.1	1761	ENSSSCP00000023001.3	1730	EQ,Nc,Sm,na	DMD,dystrophin isoform X13
hum:XP_011537119.1	1760	Susscr4EVm000695t1	1720	ncbi:XP_020948445.1	1767	ENSSSCP00000046805.1	1767	EQ,Sm,Ev,na	LRRIQ1,leucine-rich repeat and IQ domain-containing protein 1 isoform X1
hum:NP_001073312.1	1759	Susscr4EVm000431t1	1629	ncbi:XP_020950985.1	1629	ENSSSCP00000033737.1	1631	EQ,Ev,Nc,na	CASZ1,zinc finger protein castor homolog 1 isoform a
hum:XP_016885472.1	1759	Susscr4EVm001203t1	1320	ncbi:XP_020936279.1	1773	ENSSSCP00000058841.1	1333	Nc,Sm,Ev,Smlo,Evlo,	FRMPD4,FERM and PDZ domain-containing protein 4 isoform X3
hum:XP_005246622.1	1757	Susscr4EVm000429t3	1773	ncbi:XP_013839902.1	1769	ENSSSCP00000043943.1	1769	EQ,Nc,Sm,na	MAP2,microtubule-associated protein 2 isoform X19
hum:XP_005260063.1	1756	Susscr4EVm000561t4	1763	ncbi:XP_020939278.1	1762	ENSSSCP00000049422.1	1762	EQ,Nc,Sm,na	WIZ,protein Wiz isoform X3
hum:NP_001116857.1	1755	Susscr4EVm000590t1	1775	ncbi:XP_003360312.1	1775	ENSSSCP00000013027.3	1762	EQ,Nc,Sm,na	BCOR,BCL-6 corepressor isoform c
hum:NP_056070.1	1755	Susscr4EVm000570t1	1755	ncbi:XP_020952748.1	1755	ENSSSCP00000039805.1	1755	EQ,Nc,Sm,na	UBR2,E3 ubiquitin-protein ligase UBR2 isoform 1
hum:XP_024303021.1	1755	Susscr4EVm000617t1	1690	ncbi:XP_020946054.1	1635	ENSSSCP00000056225.1	1613	Ev,Nc,Sm,na	MROH1,maestro heat-like repeat-containing protein family member 1 isoform X2
hum:XP_024306826.1	1755	Susscr4EVm001016t1	1423	ncbi:XP_013844177.1	1418	ENSSSCP00000027823.2	1174	EQ,Nc,Sm,Smlo,	PLCH2,1-phosphatidylinositol 4,5-bisphosphate phosphodiesterase eta-2 isoform X1
hum:NP_569711.2	1751	Susscr4EVm000600t1	1756	ncbi:XP_020927188.1	1617	ENSSSCP00000058425.1	1320	Ev,Nc,Sm,Smlo,	COL18A1,collagen alpha-1(XVIII) chain isoform 3 preproprotein
hum:XP_011510925.1	1750	Susscr4EVm000082t10	1797	ncbi:XP_020931400.1	1800	ENSSSCP00000043192.1	1748	EQ,Ev,Sm,na	COL6A5,collagen alpha-5(VI) chain isoform X3
hum:NP_056169.1	1749	Susscr4EVm000603t3	1752	ncbi:XP_020925492.1	1780	ENSSSCP00000044497.1	1753	Nc,Sm,Ev,na	NUP188,nucleoporin NUP188 homolog
hum:NP_056477.1	1749	Susscr4EVm000568t2	1803	ncbi:XP_003354937.2	1749	ENSSSCP00000025952.2	1749	Ev,Nc,Sm,na	IFT172,intraflagellar transport protein 172 homolog
hum:NP_689856.6	1749	Susscr4EVm000604t1	1802	ncbi:XP_013849607.2	1791	ENSSSCP00000011482.3	1770	Ev,Nc,Sm,na	KNDC1,protein very KIND isoform 1
hum:NP_060639.3	1747	Susscr4EVm000609t2	1775	ncbi:NP_001230750.1	1774	ENSSSCP00000024358.1	1774	EQ,Nc,Sm,na	KIAA1551,uncharacterized protein KIAA1551
hum:NP_079052.2	1746	Susscr4EVm000606t2	1752	ncbi:NP_001231117.1	1750	ENSSSCP00000042418.1	1750	EQ,Nc,Sm,na	PEAK1,pseudopodium-enriched atypical kinase 1
hum:XP_011515573.1	1746	Susscr4EVm000617t2	1638	ncbi:XP_020946057.1	1618	ENSSSCP00000056225.1	1592	Ev,Nc,Sm,na	MROH1,maestro heat-like repeat-containing protein family member 1 isoform X4
hum:XP_011516930.1	1746	Susscr4EVm000168t4	1838	ncbi:NP_999395.1	1746	ENSSSCP00000024361.2	1746	Ev,Nc,Sm,na	TNC,tenascin isoform X13
hum:NP_056534.2	1745	Susscr4EVm000512t33	1826	ncbi:NP_001014971.1	1805	ENSSSCP00000006161.3	1821	EQ,Sm,Nc,na	COL5A3,collagen alpha-3(V) chain preproprotein
hum:NP_001002029.3	1744	Susscr4EVm000107t2	1794	ncbi:NP_001116561.1	1744	ENSSSCP00000001528.2	1744	Ev,Nc,Sm,na	C4B,complement C4-B preproprotein
hum:XP_011517338.1	1744	Susscr4EVm000621t1	1685	ncbi:XP_020940622.1	1693	ENSSSCP00000005213.3	1683	EQ,Ev,Sm,na	TRPM3,transient receptor potential cation channel subfamily M member 3 isoform X9
hum:XP_016866180.1	1744	Susscr4EVm000664t1	1656	ncbi:XP_001924825.2	1656	ENSSSCP00000035785.1	1656	EQ,Nc,Sm,na	SHPRH,E3 ubiquitin-protein ligase SHPRH isoform X1
hum:XP_005255761.1	1743	Susscr4EVm000036t13	1773	ncbi:XP_020941831.1	1746	ENSSSCP00000025782.2	1748	Ev,Sm,Nc,na	MARF1,meiosis regulator and mRNA stability factor 1 isoform X1
hum:XP_016876587.1	1743	Susscr4EVm000548t3	1792	ncbi:XP_005659980.1	1798	ENSSSCP00000041400.1	1792	EQ,Ev,Sm,na	TOGARAM1,TOG array regulator of axonemal microtubules protein 1 isoform X1
hum:NP_001003699.1	1742	Susscr4EVm000596t1	1764	ncbi:XP_005665609.2	1766	ENSSSCP00000001092.3	1702	EQ,Ev,Sm,na	RREB1,ras-responsive element-binding protein 1 isoform 1
hum:NP_001138462.1	1742	Susscr4EVm000614t1	1742	ncbi:XP_003128959.3	1742	ENSSSCP00000048301.1	1742	EQ,Nc,Sm,na	NWD2,NACHT and WD repeat domain-containing protein 2
hum:XP_011535268.1	1741	Susscr4EVm000322t4	1567	ncbi:XP_001924746.3	1510	ENSSSCP00000002569.3	1510	Ev,Nc,Sm,na	YLPM1,YLP motif-containing protein 1 isoform X2
hum:XP_011509772.1	1740	Susscr4EVm000589t1	1745	ncbi:XP_020931757.1	1745	ENSSSCP00000050061.1	1519	EQ,Nc,Sm,Smlo,	MBD5,methyl-CpG-binding domain protein 5 isoform X1
hum:NP_001308238.1	1738	Susscr4EVm000408t12	1810	ncbi:XP_020925890.1	1810	ENSSSCP00000040501.1	1810	EQ,Nc,Sm,na	MYLK,myosin light chain kinase, smooth muscle isoform 9
hum:XP_005259716.1	1738	Susscr4EVm000628t1	1597	ncbi:XP_020939844.1	1597	ENSSSCP00000026892.2	1597	EQ,Nc,Sm,na	DOT1L,histone-lysine N-methyltransferase, H3 lysine-79 specific isoform X1
hum:XP_011527249.1	1738	Susscr4EVm000372t27	1780	ncbi:XP_020950443.1	1778	ENSSSCP00000053242.1	1758	EQ,Nc,Sm,na	MYH7B,myosin-7B isoform X4
hum:XP_016869291.1	1737	Susscr4EVm000617t2	1638	ncbi:XP_020946054.1	1614	ENSSSCP00000056225.1	1592	Ev,Nc,Sm,na	MROH1,maestro heat-like repeat-containing protein family member 1 isoform X5
hum:XP_024306878.1	1736	Susscr4EVm000478t32	1742	ncbi:XP_020951725.1	1730	ENSSSCP00000033598.1	1737	EQ,Sm,Nc,na	MTCL1,microtubule cross-linking factor 1 isoform X1
hum:XP_016859189.1	1734	Susscr4EVm000016t2	1833	ncbi:XP_013849388.2	1833	ENSSSCP00000054333.1	1798	EQ,Nc,Sm,na	OBSL1,obscurin-like protein 1 isoform X6
hum:XP_016862214.1	1734	Susscr4EVm000477t25	1757	ncbi:XP_020924572.1	1734	ENSSSCP00000036651.1	1734	Ev,Nc,Sm,na	PBRM1,protein polybromo-1 isoform X1
hum:NP_001272368.1	1732	Susscr4EVm000623t1	1732	ncbi:XP_003359810.3	1732	ENSSSCP00000034597.1	1732	EQ,Nc,Sm,na	RICTOR,rapamycin-insensitive companion of mTOR isoform 2
hum:XP_011517340.1	1732	Susscr4EVm000621t1	1673	ncbi:XP_020930076.1	1685	ENSSSCP00000005213.3	1671	Nc,Ev,Sm,na	TRPM3,transient receptor potential cation channel subfamily M member 3 isoform X11
hum:NP_001073948.2	1731	Susscr4EVm000143t34	1762	ncbi:XP_020940100.1	1762	ENSSSCP00000055423.1	1762	EQ,Nc,Sm,na	ARHGEF28,rho guanine nucleotide exchange factor 28 isoform 1
hum:NP_001248392.1	1731	Susscr4EVm000616t10	1735	ncbi:XP_020927861.1	1740	ENSSSCP00000045243.1	1740	EQ,Sm,Ev,na	NRAP,nebulin-related-anchoring protein isoform 3
hum:NP_277052.1	1731	Susscr4EVm000513t12	1874	ncbi:XP_020938304.1	1872	ENSSSCP00000054645.1	1752	EQ,Nc,Sm,na	SHANK3,SH3 and multiple ankyrin repeat domains protein 3
hum:XP_011539367.1	1731	Susscr4EVm000523t2	1717	ncbi:XP_020952383.1	1735	ENSSSCP00000004228.3	1642	Nc,Ev,Sm,na	MAST2,microtubule-associated serine/threonine-protein kinase 2 isoform X6
hum:NP_203754.2	1729	Susscr4EVm000107t53	1799	ncbi:XP_020937678.1	1361	ENSSSCP00000023189.2	1468	Ev,Sm,Nc,Smlo,Nclo,	TNKS1BP1,182 kDa tankyrase-1-binding protein
hum:XP_016856413.1	1729	Susscr4EVm000549t1	1954	ncbi:XP_003128379.1	1719	ENSSSCP00000029039.2	1719	Ev,Nc,Sm,Nclo,Smlo,	COL24A1,collagen alpha-1(XXIV) chain isoform X1
hum:XP_016865695.1	1729	Susscr4EVm000344t3	1737	ncbi:XP_020946015.1	1729	ENSSSCP00000042651.1	1729	EQ,Nc,Sm,na	ASCC3,activating signal cointegrator 1 complex subunit 3 isoform X4
hum:XP_005268284.1	1728	Susscr4EVm000577t20	1784	ncbi:XP_020937279.1	1759	ENSSSCP00000050793.1	1746	Ev,Nc,Sm,na	CDC42BPB,serine/threonine-protein kinase MRCK beta isoform X1
hum:XP_016885672.1	1727	Susscr4EVm000346t18	1746	ncbi:XP_020920127.1	1737	ENSSSCP00000026280.2	1732	EQ,Nc,Sm,na	KIF26B,kinesin-like protein KIF26B isoform X2
hum:XP_024305122.1	1727	Susscr4EVm000557t11	1493	ncbi:XP_020921351.1	1678	ENSSSCP00000049501.1	1612	Nc,Sm,Ev,Evlo,	LMO7,LIM domain only protein 7 isoform X1
hum:NP_001136112.1	1726	Susscr4EVm000311t21	1818	ncbi:XP_020936986.1	1818	ENSSSCP00000052505.1	1817	EQ,Nc,Sm,na	TNRC6C,trinucleotide repeat-containing gene 6C protein isoform 1
hum:NP_001292353.1	1726	Susscr4EVm002469t1	917	ncbi:XP_020937495.1	893	ENSSSCP00000049308.1	1200	Sm,Ev,Nc,Evlo,Nclo,	FMN2,formin-2 isoform 1
hum:NP_001307684.1	1726	Susscr4EVm000622t1	1732	ncbi:XP_020923139.1	1726	ENSSSCP00000048930.1	1603	EQ,Nc,Sm,na	SUPT6H,transcription elongation factor SPT6
hum:XP_011510953.1	1726	Susscr4EVm000669t1	1767	ncbi:XP_020926183.1	1791	ENSSSCP00000012740.3	736	Nc,Ev,Sm,Smfr,Smlo,	ABI3BP,target of Nesh-SH3 isoform X33
hum:XP_005247359.1	1725	Susscr4EVm000669t1	1773	ncbi:XP_020926185.1	1787	ENSSSCP00000046114.1	736	Nc,Ev,Sm,Smfr,Smlo,	ABI3BP,target of Nesh-SH3 isoform X35
hum:XP_006712840.1	1725	Susscr4EVm000637t2	1707	ncbi:XP_005672324.2	1743	ENSSSCP00000017220.3	1743	EQ,Sm,Ev,na	SPHKAP,A-kinase anchor protein SPHKAP isoform X1
hum:NP_000218.3	1724	Susscr4EVm000520t12	1840	ncbi:XP_020940122.1	1829	ENSSSCP00000042818.1	1816	Ev,Nc,Sm,na	LAMA3,laminin subunit alpha-3 isoform 2 precursor
hum:NP_001317219.1	1724	Susscr4EVm000524t4	1743	ncbi:XP_020950980.1	1749	ENSSSCP00000051583.1	1743	EQ,Ev,Sm,na	KIF1A,kinesin-like protein KIF1A isoform 5
hum:NP_001615.2	1723	Susscr4EVm000366t1	1732	ncbi:XP_003121377.4	1732	ENSSSCP00000026798.2	1732	EQ,Nc,Sm,na	CRYBG1,beta/gamma crystallin domain-containing protein 1
hum:XP_011537121.1	1723	Susscr4EVm000695t1	1719	ncbi:XP_020948454.1	1730	ENSSSCP00000046805.1	1719	Nc,Ev,Sm,na	LRRIQ1,leucine-rich repeat and IQ domain-containing protein 1 isoform X3
hum:NP_001073379.1	1722	Susscr4EVm000695t1	1720	ncbi:XP_020948453.1	1729	ENSSSCP00000046805.1	1723	EQ,Sm,Ev,na	LRRIQ1,leucine-rich repeat and IQ domain-containing protein 1
hum:NP_065859.3	1722	Susscr4EVm000567t1	1881	ncbi:XP_005656429.1	1881	ENSSSCP00000033710.1	1881	EQ,Nc,Sm,na	SIPA1L2,signal-induced proliferation-associated 1-like protein 2
hum:XP_011531155.1	1722	Susscr4EVm000559t13	1744	ncbi:XP_020943312.1	1722	ENSSSCP00000002566.3	1680	Ev,Nc,Sm,na	LTBP1,latent-transforming growth factor beta-binding protein 1 isoform X1
hum:NP_003015.2	1721	Susscr4EVm000629t2	1783	ncbi:XP_020944009.1	1783	ENSSSCP00000038885.1	1476	EQ,Nc,Sm,Smlo,	ITSN1,intersectin-1 isoform ITSN-l
hum:XP_006713634.1	1721	Susscr4EVm000669t2	1764	ncbi:XP_020926172.1	1814	ENSSSCP00000012740.3	736	Nc,Ev,Sm,Smfr,Smlo,	ABI3BP,target of Nesh-SH3 isoform X37
hum:XP_011509378.1	1721	Susscr4EVm000617t2	1644	ncbi:XP_013840068.2	1721	ENSSSCP00000017275.3	1698	Nc,Sm,Ev,na	MROH2A,maestro heat-like repeat-containing protein family member 2A isoform X1
hum:XP_016861205.1	1721	Susscr4EVm000082t9	1769	ncbi:XP_020931400.1	1758	ENSSSCP00000043192.1	1692	Ev,Nc,Sm,na	COL6A6,collagen alpha-6(VI) chain isoform X5
hum:NP_056240.2	1720	Susscr4EVm000627t1	1723	ncbi:XP_005662463.2	1722	ENSSSCP00000024326.2	1568	EQ,Nc,Sm,na	POLR1A,DNA-directed RNA polymerase I subunit RPA1
hum:NP_001341358.1	1718	Susscr4EVm000365t4	1718	ncbi:XP_020929194.1	1548	ENSSSCP00000011114.3	1399	Ev,Nc,Sm,Smlo,	PCDH15,protocadherin-15 isoform CD3-b precursor
hum:NP_036363.2	1718	Susscr4EVm000298t1	1722	ncbi:XP_020953220.1	1722	ENSSSCP00000042980.1	1126	EQ,Nc,Sm,Smfr,Smlo,	PRDM2,PR domain zinc finger protein 2 isoform a
hum:XP_011520124.1	1718	Susscr4EVm000594t1	1792	ncbi:XP_020929926.1	1855	ENSSSCP00000041180.1	1786	Nc,Ev,Sm,na	ADAMTSL3,ADAMTS-like protein 3 isoform X1
hum:XP_011539975.1	1718	Susscr4EVm000612t1	1136	ncbi:XP_020951287.1	1120	ENSSSCP00000054651.1	1117	Ev,Nc,Sm,na	CRYBG2,beta/gamma crystallin domain-containing protein 2 isoform X3
hum:XP_016874530.1	1718	Susscr4EVm000610t1	1752	ncbi:XP_020947582.1	1722	ENSSSCP00000034727.1	1722	Ev,Nc,Sm,na	MON2,protein MON2 homolog isoform X1
hum:XP_024304245.1	1718	Susscr4EVm000583t3	1369	ncbi:XP_013849925.2	1822	ENSSSCP00000014158.3	1184	Nc,Ev,Sm,Evlo,Smfr,Smlo,	DCDC1,doublecortin domain-containing protein 1 isoform X5
hum:XP_024307049.1	1718	Susscr4EVm000691t1	1721	ncbi:XP_003127892.2	1721	ENSSSCP00000021846.2	1089	EQ,Nc,Sm,Smfr,Smlo,	MYOM1,myomesin-1 isoform X1
hum:NP_919431.2	1717	Susscr4EVm000654t1	1741	ncbi:XP_020955283.1	1732	ENSSSCP00000005267.3	1732	EQ,Nc,Sm,na	PHLPP1,PH domain leucine-rich repeat-containing protein phosphatase 1
hum:XP_011510071.1	1715	Susscr4EVm000089t16	1669	ncbi:XP_005662394.2	1669	ENSSSCP00000008687.3	1669	EQ,Nc,Sm,na	RGPD6,RANBP2-like and GRIP domain-containing protein 5/6 isoform X6
hum:XP_011543672.1	1715	Susscr4EVm000662t5	1713	ncbi:XP_020955617.1	1718	ENSSSCP00000026569.2	863	EQ,Ev,Sm,Smfr,Smlo,	NRXN2,neurexin-2-beta isoform X1
hum:NP_690850.2	1714	Susscr4EVm000549t2	1976	ncbi:XP_020946000.1	1700	ENSSSCP00000005883.3	1486	Ev,Nc,Sm,Nclo,Smlo,	COL24A1,collagen alpha-1(XXIV) chain isoform 1 precursor
hum:XP_016862226.1	1713	Susscr4EVm000477t25	1757	ncbi:XP_020924561.1	1713	ENSSSCP00000046027.1	1713	Ev,Nc,Sm,na	PBRM1,protein polybromo-1 isoform X10
hum:NP_001837.2	1712	Susscr4EVm000641t1	1726	ncbi:XP_020921567.1	1712	ENSSSCP00000010191.3	1712	Ev,Nc,Sm,na	COL4A2,collagen alpha-2(IV) chain preproprotein
hum:NP_060101.3	1712	Susscr4EVm000645t1	1704	ncbi:XP_020927871.1	1704	ENSSSCP00000054579.1	1705	EQ,Ev,Nc,na	DDX60,probable ATP-dependent RNA helicase DDX60
hum:NP_006026.3	1711	Susscr4EVm000577t20	1767	ncbi:XP_020920087.1	1754	ENSSSCP00000050793.1	1732	Ev,Nc,Sm,na	CDC42BPB,serine/threonine-protein kinase MRCK beta
hum:NP_001181927.1	1710	Susscr4EVm000630t1	1727	ncbi:XP_005659689.1	1727	ENSSSCP00000005016.2	1727	EQ,Nc,Sm,na	CEP152,centrosomal protein of 152 kDa isoform 1
hum:NP_001261.2	1710	Susscr4EVm000504t1	1751	ncbi:XP_013833724.1	1871	ENSSSCP00000023979.2	1712	Nc,Ev,Sm,na	CHD1,chromodomain-helicase-DNA-binding protein 1
hum:XP_011513476.1	1710	Susscr4EVm001055t1	1288	ncbi:XP_013835187.1	1831	ENSSSCP00000026597.2	1345	Nc,Sm,Ev,Smlo,Evlo,	VWDE,von Willebrand factor D and EGF domain-containing protein isoform X1
hum:XP_011515697.1	1710	Susscr4EVm000750t4	1739	ncbi:XP_020946256.1	1728	ENSSSCP00000035737.1	1706	Ev,Nc,Sm,na	RIMS2,regulating synaptic membrane exocytosis protein 2 isoform X1
hum:NP_065772.1	1709	Susscr4EVm002868t1	902	ncbi:XP_020935852.1	1657	ENSSSCP00000058207.1	1657	EQ,Sm,Ev,Evfr,Evlo,	KIAA1210,acrosomal protein KIAA1210
hum:NP_075556.1	1709	Susscr4EVm000624t1	1673	ncbi:NP_999511.1	1673	ENSSSCP00000034728.1	1673	EQ,Nc,Sm,na	SIGLEC1,sialoadhesin precursor
hum:NP_001317218.1	1708	Susscr4EVm000626t2	1735	ncbi:XP_020950980.1	1759	ENSSSCP00000051583.1	1726	Nc,Ev,Sm,na	KIF1A,kinesin-like protein KIF1A isoform 4
hum:NP_689969.2	1708	Susscr4EVm000623t1	1732	ncbi:XP_005672486.2	1732	ENSSSCP00000034597.1	1732	EQ,Nc,Sm,na	RICTOR,rapamycin-insensitive companion of mTOR isoform 1
hum:XP_006718908.1	1708	Susscr4EVm000101t2	1739	ncbi:NP_001116552.1	1708	ENSSSCP00000040560.1	1708	Ev,Nc,Sm,na	ATM,serine-protein kinase ATM isoform X8
hum:XP_006724680.1	1708	Susscr4EVm000588t2	1809	ncbi:XP_020921567.1	1769	ENSSSCP00000010191.3	1769	Ev,Nc,Sm,na	COL4A6,collagen alpha-6(IV) chain isoform X1
hum:NP_055527.1	1707	Susscr4EVm000642t1	1708	ncbi:XP_020942065.1	1708	ENSSSCP00000008310.3	1043	EQ,Nc,Sm,Smfr,Smlo,	SETD1A,histone-lysine N-methyltransferase SETD1A
hum:XP_006715502.1	1707	Susscr4EVm000664t1	1654	ncbi:XP_020942739.1	1656	ENSSSCP00000035785.1	1654	EQ,Ev,Sm,na	SHPRH,E3 ubiquitin-protein ligase SHPRH isoform X2
hum:XP_011511221.1	1707	Susscr4EVm000597t1	1761	ncbi:XP_005669972.2	1744	ENSSSCP00000007572.3	681	Ev,Nc,Sm,Smfr,Smlo,	XRN1,5'-3' exoribonuclease 1 isoform X1
hum:XP_011530351.1	1706	Susscr4EVm000387t1	1699	ncbi:XP_020957144.1	1699	ENSSSCP00000027872.2	1577	EQ,Nc,Sm,na	DCHS2,protocadherin-23 isoform X2
hum:XP_024303600.1	1706	Susscr4EVm000658t3	1723	ncbi:XP_020928197.1	1740	ENSSSCP00000054881.1	1730	Nc,Sm,Ev,na	USP54,inactive ubiquitin carboxyl-terminal hydrolase 54 isoform X1
hum:XP_005247295.1	1705	Susscr4EVm000647t1	1708	ncbi:XP_013837599.1	1708	ENSSSCP00000052217.1	1708	EQ,Nc,Sm,na	PLCH1,1-phosphatidylinositol 4,5-bisphosphate phosphodiesterase eta-1 isoform X1
hum:NP_001080.2	1704	Susscr4EVm000582t2	1722	ncbi:XP_020942157.1	1707	ENSSSCP00000008599.3	1703	Ev,Nc,Sm,na	ABCA3,ATP-binding cassette sub-family A member 3
hum:NP_056045.2	1704	Susscr4EVm000633t1	1715	ncbi:XP_020956745.1	1723	ENSSSCP00000055924.1	1717	EQ,Sm,Ev,na	ARAP2,arf-GAP with Rho-GAP domain, ANK repeat and PH domain-containing protein 2
hum:XP_011538498.1	1704	Susscr4EVm000676t1	1706	ncbi:XP_020928477.1	1706	ENSSSCP00000027927.2	412	EQ,Nc,Sm,Smfr,Smlo,	CFAP43,cilia- and flagella-associated protein 43 isoform X1
hum:NP_001073890.2	1703	Susscr4EVm000753t1	1707	ncbi:XP_020939202.1	1732	ENSSSCP00000031563.1	1732	EQ,Sm,Ev,na	UNC13A,protein unc-13 homolog A
hum:XP_006717281.1	1702	Susscr4EVm000206t11	1107	ncbi:XP_020922883.1	1107	ENSSSCP00000043637.1	1109	EQ,Ev,Nc,na	ZNF462,zinc finger protein 462 isoform X4
hum:NP_036586.2	1701	Susscr4EVm000640t1	1737	ncbi:XP_020927592.1	1735	ENSSSCP00000004392.3	1735	EQ,Nc,Sm,na	TIAM2,T-lymphoma invasion and metastasis-inducing protein 2 isoform a
hum:NP_065944.2	1701	Susscr4EVm000702t1	1682	ncbi:XP_020940781.1	1690	ENSSSCP00000024046.2	1138	EQ,Ev,Sm,Smlo,	CCDC180,coiled-coil domain-containing protein 180 isoform 1
hum:XP_005263415.1	1701	Susscr4EVm000714t1	1727	ncbi:XP_020941062.1	1715	ENSSSCP00000054291.1	1715	Ev,Nc,Sm,na	RAPGEF2,rap guanine nucleotide exchange factor 2 isoform X1
hum:XP_011527631.1	1701	Susscr4EVm000624t3	1639	ncbi:NP_999511.1	1626	ENSSSCP00000034728.1	1626	Ev,Nc,Sm,na	SIGLEC1,sialoadhesin isoform X2
hum:XP_024303614.1	1701	Susscr4EVm000658t1	1720	ncbi:XP_020928197.1	1740	ENSSSCP00000054881.1	1725	Nc,Sm,Ev,na	USP54,inactive ubiquitin carboxyl-terminal hydrolase 54 isoform X2
hum:NP_001006608.2	1700	Susscr4EVm000331t8	2051	ncbi:XP_003358058.4	1660	ENSSSCP00000018357.3	751	Ev,Nc,Sm,Nclo,Smfr,Smlo,	LRRC37A2,leucine-rich repeat-containing protein 37A2 precursor
hum:NP_001136116.1	1700	Susscr4EVm000637t3	1718	ncbi:XP_020930543.1	1718	ENSSSCP00000043902.1	1718	EQ,Nc,Sm,na	SPHKAP,A-kinase anchor protein SPHKAP isoform 1
hum:XP_016859620.1	1700	Susscr4EVm000429t1	1773	ncbi:XP_013839898.1	1769	ENSSSCP00000032550.1	1769	EQ,Nc,Sm,na	MAP2,microtubule-associated protein 2 isoform X20
hum:XP_016861140.1	1700	Susscr4EVm000403t8	1757	ncbi:XP_003131332.1	1753	ENSSSCP00000018312.3	1753	EQ,Nc,Sm,na	SCN11A,sodium channel protein type 11 subunit alpha isoform X4
hum:XP_011533454.1	1699	Susscr4EVm007883t1	531	ncbi:XP_020921066.1	1681	ENSSSCP00000010221.3	1685	EQ,Nc,Ev,Evfr,Evlo,	RNF17,RING finger protein 17 isoform X1
hum:NP_001239133.1	1698	Susscr4EVm000657t1	1766	ncbi:NP_001001646.1	1766	ENSSSCP00000043852.1	1766	EQ,Nc,Sm,na	C4A,complement C4-A isoform 2 preproprotein
hum:NP_006268.2	1697	Susscr4EVm000634t1	1774	ncbi:XP_020926605.1	1779	ENSSSCP00000038885.1	1534	EQ,Ev,Sm,Smlo,	ITSN2,intersectin-2 isoform 1
hum:XP_005266358.1	1697	Susscr4EVm000673t15	721	ncbi:XP_020921252.1	683	ENSSSCP00000010047.3	680	Ev,Nc,Sm,na	ZC3H13,zinc finger CCCH domain-containing protein 13 isoform X1
hum:XP_011520126.1	1697	Susscr4EVm000682t1	1725	ncbi:XP_020929919.1	1768	ENSSSCP00000041180.1	1699	Nc,Ev,Sm,na	ADAMTSL3,ADAMTS-like protein 3 isoform X4
hum:XP_016882562.1	1697	Susscr4EVm000473t15	1768	ncbi:XP_020952521.1	1829	ENSSSCP00000039869.1	1762	Nc,Ev,Sm,na	PTPRS,receptor-type tyrosine-protein phosphatase S isoform X10
hum:XP_016885151.1	1697	Susscr4EVm000723t14	1699	ncbi:XP_013841848.1	1697	ENSSSCP00000041432.1	1697	EQ,Nc,Sm,na	THOC2,THO complex subunit 2 isoform X1
hum:XP_005269921.1	1696	Susscr4EVm000616t1	1731	ncbi:XP_020927859.1	1737	ENSSSCP00000031875.1	1731	EQ,Ev,Sm,na	NRAP,nebulin-related-anchoring protein isoform X1
hum:XP_006712841.1	1696	Susscr4EVm000637t4	1707	ncbi:XP_005672324.2	1743	ENSSSCP00000017220.3	1743	EQ,Sm,Ev,na	SPHKAP,A-kinase anchor protein SPHKAP isoform X3
hum:XP_005269922.1	1695	Susscr4EVm000616t10	1735	ncbi:XP_020927854.1	1735	ENSSSCP00000038707.1	1735	EQ,Nc,Sm,na	NRAP,nebulin-related-anchoring protein isoform X3
hum:XP_016885153.1	1695	Susscr4EVm000723t4	1699	ncbi:XP_013841848.1	1697	ENSSSCP00000041432.1	1697	EQ,Nc,Sm,na	THOC2,THO complex subunit 2 isoform X2
hum:NP_001124432.1	1693	Susscr4EVm000647t1	1682	ncbi:XP_005669995.1	1696	ENSSSCP00000056890.1	1696	EQ,Sm,Ev,na	PLCH1,1-phosphatidylinositol 4,5-bisphosphate phosphodiesterase eta-1 isoform a
hum:NP_001138502.1	1692	Susscr4EVm000959t1	1450	ncbi:XP_020927382.1	1713	ENSSSCP00000027293.2	1715	EQ,Nc,Ev,Evlo,	TOPAZ1,testis- and ovary-specific PAZ domain-containing protein 1
hum:NP_001287955.1	1692	Susscr4EVm000517t15	1731	ncbi:XP_020954486.1	1695	ENSSSCP00000005227.3	1705	Ev,Sm,Nc,na	TJP1,tight junction protein ZO-1 isoform d
hum:NP_055804.2	1692	Susscr4EVm000750t1	1604	ncbi:XP_020928538.1	1702	ENSSSCP00000004621.3	1692	Nc,Sm,Ev,na	RIMS1,regulating synaptic membrane exocytosis protein 1 isoform 1
hum:XP_016879309.1	1691	Susscr4EVm000260t29	1694	ncbi:XP_020942526.1	1626	ENSSSCP00000031360.1	1626	Ev,Nc,Sm,na	CACNA1H,voltage-dependent T-type calcium channel subunit alpha-1H isoform X7
hum:NP_000083.3	1690	Susscr4EVm000588t1	1772	ncbi:XP_020921567.1	1772	ENSSSCP00000010191.3	1772	EQ,Nc,Sm,na	COL4A4,collagen alpha-4(IV) chain precursor
hum:NP_001036068.1	1690	Susscr4EVm000655t1	1697	ncbi:XP_020948145.1	1690	ENSSSCP00000052844.1	1690	EQ,Nc,Sm,na	KDM5A,lysine-specific demethylase 5A
hum:NP_542197.3	1690	Susscr4EVm000619t1	1754	ncbi:XP_001929407.6	1711	ENSSSCP00000006161.3	1691	Ev,Nc,Sm,na	COL11A1,collagen alpha-1(XI) chain isoform C preproprotein
hum:XP_005254194.1	1689	Susscr4EVm000535t10	1686	ncbi:XP_020954498.1	1686	ENSSSCP00000001925.3	1686	EQ,Nc,Sm,na	ADAMTS7,A disintegrin and metalloproteinase with thrombospondin motifs 7 isoform X1
hum:NP_001341944.1	1688	Susscr4EVm000517t15	1739	ncbi:XP_003480471.3	1700	ENSSSCP00000005227.3	1705	Ev,Sm,Nc,na	TJP1,tight junction protein ZO-1 isoform i
hum:XP_006712933.1	1687	Susscr4EVm000584t1	1687	ncbi:XP_003124901.3	1687	ENSSSCP00000008689.3	1687	EQ,Nc,Sm,na	GCC2,GRIP and coiled-coil domain-containing protein 2 isoform X1
hum:XP_006724842.1	1687	Susscr4EVm000572t2	1716	ncbi:XP_013841875.1	1692	ENSSSCP00000013454.2	1692	Ev,Nc,Sm,na	BCORL1,BCL-6 corepressor-like protein 1 isoform X2
hum:NP_001308307.1	1686	Susscr4EVm000632t1	1719	ncbi:XP_020938934.1	1690	ENSSSCP00000025092.2	1690	Ev,Nc,Sm,na	PIK3C2A,phosphatidylinositol 4-phosphate 3-kinase C2 domain-containing subunit alpha isoform 1
hum:NP_001333342.1	1686	Susscr4EVm000537t4	1688	ncbi:XP_013834646.1	1688	ENSSSCP00000015822.3	1688	EQ,Nc,Sm,na	PCF11,pre-mRNA cleavage complex 2 protein Pcf11 isoform 1
hum:NP_653080.1	1684	Susscr4EVm000555t6	1694	ncbi:XP_001927300.5	1690	ENSSSCP00000047588.1	1685	EQ,Nc,Sm,na	AKAP12,A-kinase anchor protein 12 isoform 2
hum:XP_011529485.1	1684	Susscr4EVm000327t1	1783	ncbi:XP_020946936.1	1769	ENSSSCP00000013589.3	1765	Ev,Nc,Sm,na	PLXNA3,plexin-A3 isoform X4
hum:XP_024306883.1	1684	Susscr4EVm000478t34	1685	ncbi:XP_020951725.1	1666	ENSSSCP00000020952.2	1682	EQ,Sm,Nc,na	MTCL1,microtubule cross-linking factor 1 isoform X7
hum:XP_005246927.1	1683	Susscr4EVm000637t1	1700	ncbi:XP_005672324.2	1700	ENSSSCP00000017220.3	1700	EQ,Nc,Sm,na	SPHKAP,A-kinase anchor protein SPHKAP isoform X4
hum:XP_024303022.1	1683	Susscr4EVm000617t2	1535	ncbi:XP_003133959.4	1537	ENSSSCP00000021464.2	1537	EQ,Sm,Ev,na	MROH1,maestro heat-like repeat-containing protein family member 1 isoform X8
hum:NP_001073893.1	1682	Susscr4EVm000581t2	1737	ncbi:XP_020923492.1	1656	ENSSSCP00000023000.2	1447	Ev,Nc,Sm,Smlo,	KDM6B,lysine-specific demethylase 6B isoform 1
hum:NP_001304092.1	1682	Susscr4EVm000635t1	1748	ncbi:XP_020936478.1	1736	ENSSSCP00000014528.3	1708	Ev,Nc,Sm,na	C5,complement C5 isoform 2
hum:NP_002967.2	1682	Susscr4EVm000402t13	1753	ncbi:XP_020927337.1	1815	ENSSSCP00000026043.2	1807	EQ,Sm,Ev,na	SCN7A,sodium channel protein type 7 subunit alpha
hum:XP_005257069.1	1682	Susscr4EVm000665t2	1691	ncbi:NP_001139599.1	1682	ENSSSCP00000030190.2	1682	EQ,Nc,Sm,na	CLTC,clathrin heavy chain 1 isoform X1
hum:XP_016858130.1	1681	Susscr4EVm001310t1	1267	ncbi:XP_020950851.1	1718	ENSSSCP00000027856.2	1684	Nc,Sm,Ev,Evlo,	CFAP74,cilia- and flagella-associated protein 74 isoform X1
hum:XP_016859535.1	1681	Susscr4EVm000653t22	669	ncbi:XP_020920528.1	651	ENSSSCP00000043243.1	651	Ev,Nc,Sm,na	ANKRD36,ankyrin repeat domain-containing protein 36A isoform X36
hum:XP_011539385.1	1680	Susscr4EVm001414t1	947	ncbi:XP_020953165.1	1676	ENSSSCP00000050065.1	1612	Nc,Sm,Ev,Evfr,Evlo,	CAMTA1,calmodulin-binding transcription activator 1 isoform X1
hum:XP_011539386.1	1680	Susscr4EVm001414t1	927	ncbi:XP_020953161.1	1700	ENSSSCP00000033820.1	1612	Nc,Sm,Ev,Evfr,Evlo,	CAMTA1,calmodulin-binding transcription activator 1 isoform X2
hum:NP_001122321.1	1679	Susscr4EVm000243t3	1711	ncbi:XP_013850145.2	1683	ENSSSCP00000031107.2	1679	Ev,Nc,Sm,na	SMARCA4,0
hum:NP_001275582.1	1679	Susscr4EVm000665t2	1688	ncbi:XP_020921706.1	1686	ENSSSCP00000030190.2	1679	EQ,Nc,Sm,na	CLTC,clathrin heavy chain 1 isoform 2
hum:XP_005255258.1	1679	Susscr4EVm000692t1	1682	ncbi:XP_020942099.1	1682	ENSSSCP00000029612.2	1662	EQ,Nc,Sm,na	KIAA0556,protein KIAA0556 isoform X1
hum:XP_016862242.1	1679	Susscr4EVm000477t1	1729	ncbi:XP_020924572.1	1734	ENSSSCP00000046027.1	1729	EQ,Ev,Sm,na	PBRM1,protein polybromo-1 isoform X19
hum:XP_016880628.1	1679	Susscr4EVm000721t1	1535	ncbi:XP_020923655.1	1554	ENSSSCP00000044826.1	1539	Nc,Sm,Ev,na	MYO15B,myosin XVB isoform X18
hum:XP_011540672.1	1678	Susscr4EVm000493t4	1699	ncbi:XP_020953298.1	1696	ENSSSCP00000003812.3	1679	EQ,Nc,Sm,na	EIF4G3,eukaryotic translation initiation factor 4 gamma 3 isoform X1
hum:XP_024307427.1	1678	Susscr4EVm000243t3	1711	ncbi:XP_020939493.1	1683	ENSSSCP00000031107.2	1679	Ev,Nc,Sm,na	SMARCA4,transcription activator BRG1 isoform X2
hum:NP_848552.1	1677	Susscr4EVm002700t1	971	ncbi:XP_005673122.2	1719	ENSSSCP00000008034.3	1719	EQ,Sm,Ev,Evfr,Evlo,	ZNF831,zinc finger protein 831
hum:XP_011523143.1	1676	Susscr4EVm000331t8	2051	ncbi:XP_020922489.1	1660	ENSSSCP00000018357.3	751	Ev,Nc,Sm,Nclo,Smfr,Smlo,	LRRC37A2,leucine-rich repeat-containing protein 37A2 isoform X1
hum:XP_005269064.1	1675	Susscr4EVm000705t2	1710	ncbi:XP_020919928.1	1679	ENSSSCP00000043677.1	1675	Ev,Nc,Sm,na	KIF21A,kinesin-like protein KIF21A isoform X1
hum:XP_016869496.1	1675	Susscr4EVm000750t8	1686	ncbi:XP_020928601.1	1766	ENSSSCP00000035737.1	1738	Nc,Sm,Ev,na	RIMS2,regulating synaptic membrane exocytosis protein 2 isoform X3
hum:XP_011534268.1	1672	Susscr4EVm000704t12	1677	ncbi:XP_005659230.1	1677	ENSSSCP00000056813.1	1676	EQ,Nc,Sm,na	NHSL1,NHS-like protein 1 isoform X1
hum:XP_016869497.1	1672	Susscr4EVm000750t8	1746	ncbi:XP_020946256.1	1739	ENSSSCP00000004621.3	1596	EQ,Nc,Sm,na	RIMS2,regulating synaptic membrane exocytosis protein 2 isoform X4
hum:NP_085126.2	1671	Susscr4EVm000637t1	1718	ncbi:XP_020930540.1	1718	ENSSSCP00000058365.1	1717	EQ,Nc,Sm,na	SPHKAP,A-kinase anchor protein SPHKAP isoform 2
hum:XP_024306884.1	1671	Susscr4EVm000478t26	1681	ncbi:XP_020951725.1	1676	ENSSSCP00000020952.2	1679	EQ,Sm,Nc,na	MTCL1,microtubule cross-linking factor 1 isoform X8
hum:XP_005265056.1	1670	Susscr4EVm000593t1	1679	ncbi:XP_003358532.2	1679	ENSSSCP00000025328.2	1502	EQ,Nc,Sm,Smlo,	FAM208A,protein TASOR isoform X1
hum:XP_005269065.1	1670	Susscr4EVm000671t4	1705	ncbi:XP_013853388.2	1705	ENSSSCP00000043677.1	1670	EQ,Nc,Sm,na	KIF21A,kinesin-like protein KIF21A isoform X2
hum:XP_011509271.2	1670	Susscr4EVm000769t1	1544	ncbi:NP_001302641.1	1544	ENSSSCP00000016673.3	1544	EQ,Nc,Sm,na	GLI2,zinc finger protein GLI2 isoform X1
hum:NP_001070256.1	1669	Susscr4EVm000673t1	680	ncbi:XP_020921252.1	683	ENSSSCP00000010047.3	652	EQ,Ev,Sm,na	ZC3H13,zinc finger CCCH domain-containing protein 13 isoform 1
hum:XP_016859622.1	1669	Susscr4EVm000429t1	1741	ncbi:XP_003483773.2	1768	ENSSSCP00000032550.1	1737	Nc,Ev,Sm,na	MAP2,microtubule-associated protein 2 isoform X21
hum:NP_783297.2	1668	Susscr4EVm000517t15	1739	ncbi:XP_020954504.1	1700	ENSSSCP00000005227.3	1705	Ev,Sm,Nc,na	TJP1,tight junction protein ZO-1 isoform b
hum:XP_005269066.1	1668	Susscr4EVm000705t2	1703	ncbi:XP_003126654.5	1675	ENSSSCP00000043677.1	1668	Ev,Nc,Sm,na	KIF21A,kinesin-like protein KIF21A isoform X3
hum:NP_078970.3	1667	Susscr4EVm000764t1	1587	ncbi:XP_013847960.2	1587	ENSSSCP00000004450.3	1587	EQ,Nc,Sm,na	ADGB,androglobin
hum:XP_006713878.1	1665	Susscr4EVm000126t15	1665	ncbi:XP_020926913.1	1621	ENSSSCP00000020179.2	1640	Ev,Sm,Nc,na	KALRN,kalirin isoform X16
hum:XP_016876716.1	1665	Susscr4EVm000686t1	1669	ncbi:XP_020919799.1	1670	ENSSSCP00000054251.1	1670	EQ,Sm,Ev,na	CEP170B,centrosomal protein of 170 kDa protein B isoform X1
hum:XP_016885161.1	1665	Susscr4EVm000723t1	1692	ncbi:XP_013841848.1	1697	ENSSSCP00000041432.1	1665	EQ,Ev,Sm,na	THOC2,THO complex subunit 2 isoform X4
hum:NP_055877.3	1664	Susscr4EVm000666t2	1683	ncbi:XP_020928397.1	1683	ENSSSCP00000011266.3	1671	EQ,Nc,Sm,na	PPRC1,peroxisome proliferator-activated receptor gamma coactivator-related protein 1 isoform 1
hum:NP_219499.1	1663	Susscr4EVm000685t1	1664	ncbi:XP_020934314.1	1664	ENSSSCP00000017609.3	1664	EQ,Nc,Sm,na	CTTNBP2,cortactin-binding protein 2
hum:XP_016869180.1	1663	Susscr4EVm000731t1	1665	ncbi:XP_020944450.1	1668	ENSSSCP00000054635.1	1665	EQ,Ev,Sm,na	ADGRB1,adhesion G protein-coupled receptor B1 isoform X1
hum:XP_011525678.1	1662	Susscr4EVm000292t13	1684	ncbi:XP_020950058.1	1663	ENSSSCP00000055818.1	1512	Ev,Nc,Sm,Smlo,	LTBP4,latent-transforming growth factor beta-binding protein 4 isoform X1
hum:XP_011543331.1	1662	Susscr4EVm000701t1	1657	ncbi:XP_020948003.1	1638	ENSSSCP00000022247.2	1489	Ev,Nc,Sm,Smlo,	LRP5,low-density lipoprotein receptor-related protein 5 isoform X1
hum:NP_060111.2	1661	Susscr4EVm000705t2	1696	ncbi:XP_013853381.2	1675	ENSSSCP00000043677.1	1661	Ev,Nc,Sm,na	KIF21A,kinesin-like protein KIF21A isoform 2
hum:NP_542194.2	1661	Susscr4EVm000478t1	1844	ncbi:XP_020951725.1	1819	ENSSSCP00000007800.3	1665	Ev,Nc,Sm,na	SOGA1,protein SOGA1 isoform 1
hum:XP_016856263.1	1661	Susscr4EVm001414t1	928	ncbi:XP_020953163.1	1668	ENSSSCP00000050065.1	1592	Nc,Sm,Ev,Evfr,Evlo,	CAMTA1,calmodulin-binding transcription activator 1 isoform X4
hum:NP_065871.2	1659	Susscr4EVm000726t2	1646	ncbi:XP_020933699.1	1641	ENSSSCP00000035207.1	1643	EQ,Sm,Nc,na	PREX1,phosphatidylinositol 3,4,5-trisphosphate-dependent Rac exchanger 1 protein
hum:XP_016856324.1	1658	Susscr4EVm000183t15	1663	ncbi:XP_020935806.1	1657	ENSSSCP00000041675.1	1657	EQ,Nc,Sm,na	USP24,ubiquitin carboxyl-terminal hydrolase 24 isoform X6
hum:NP_003861.1	1657	Susscr4EVm000659t1	1673	ncbi:XP_013852411.1	1657	ENSSSCP00000001984.3	1657	Ev,Nc,Sm,na	IQGAP1,ras GTPase-activating-like protein IQGAP1
hum:NP_056019.1	1657	Susscr4EVm000700t1	1657	ncbi:XP_020958091.1	1657	ENSSSCP00000020719.2	1657	EQ,Nc,Sm,na	THSD7A,thrombospondin type-1 domain-containing protein 7A precursor
hum:NP_065970.2	1657	Susscr4EVm000698t1	1657	ncbi:XP_020931838.1	1657	ENSSSCP00000031197.1	1657	EQ,Nc,Sm,na	ALS2,alsin isoform 1
hum:XP_005247363.1	1657	Susscr4EVm000669t2	1746	ncbi:XP_020926185.1	1768	ENSSSCP00000046114.1	731	Nc,Ev,Sm,Smfr,Smlo,	ABI3BP,target of Nesh-SH3 isoform X46
hum:XP_006711906.1	1656	Susscr4EVm000686t1	1660	ncbi:XP_020919807.1	1659	ENSSSCP00000027671.2	1659	EQ,Nc,Sm,na	CEP170,centrosomal protein of 170 kDa isoform X1
hum:XP_011539389.1	1656	Susscr4EVm001414t3	944	ncbi:XP_020953165.1	1676	ENSSSCP00000050065.1	1612	Nc,Sm,Ev,Evfr,Evlo,	CAMTA1,calmodulin-binding transcription activator 1 isoform X5
hum:XP_016858278.1	1656	Susscr4EVm000457t3	1621	ncbi:XP_020945454.1	1644	ENSSSCP00000033858.1	1644	EQ,Sm,Ev,na	NUP210L,nuclear pore membrane glycoprotein 210-like isoform X5
hum:NP_874365.3	1655	Susscr4EVm000699t51	1714	ncbi:XP_020946205.1	1660	ENSSSCP00000044637.1	1658	Ev,Nc,Sm,na	SCRIB,protein scribble homolog isoform a
hum:XP_005252031.1	1655	Susscr4EVm000242t7	1655	ncbi:XP_020938847.1	1655	ENSSSCP00000030534.2	1627	EQ,Nc,Sm,na	TNC,tenascin isoform X14
hum:XP_011511944.1	1655	Susscr4EVm000663t8	1661	ncbi:XP_020956816.1	1658	ENSSSCP00000009377.3	874	EQ,Nc,Sm,Smfr,Smlo,	LIMCH1,LIM and calponin homology domains-containing protein 1 isoform X1
hum:NP_001316363.1	1654	Susscr4EVm000398t2	1654	ncbi:XP_020934887.1	1654	ENSSSCP00000058601.1	1654	EQ,Nc,Sm,na	NUP205,nuclear pore complex protein Nup205 isoform 2
hum:XP_011511987.2	1654	Susscr4EVm000113t2	1574	ncbi:XP_020956833.1	1655	ENSSSCP00000009968.3	1573	Nc,Ev,Sm,na	FRYL,protein furry homolog-like isoform X9
hum:XP_011532278.1	1654	Susscr4EVm000677t1	1669	ncbi:XP_020927029.1	1654	ENSSSCP00000052686.1	1598	Ev,Nc,Sm,na	ROBO1,roundabout homolog 1 isoform X1
hum:NP_001338234.1	1653	Susscr4EVm000406t6	1638	ncbi:XP_003127691.2	1535	ENSSSCP00000044613.1	1535	Ev,Nc,Sm,na	CROCC2,putative ciliary rootlet coiled-coil protein 2
hum:XP_024303111.1	1653	Susscr4EVm000750t5	1664	ncbi:XP_020928601.1	1755	ENSSSCP00000035737.1	1717	Nc,Sm,Ev,na	RIMS2,regulating synaptic membrane exocytosis protein 2 isoform X6
hum:XP_005270733.1	1652	Susscr4EVm000644t3	1677	ncbi:XP_020952293.1	1677	ENSSSCP00000004175.3	1648	EQ,Nc,Sm,na	ZCCHC11,terminal uridylyltransferase 4 isoform X1
hum:XP_011511946.1	1652	Susscr4EVm000663t1	1658	ncbi:XP_020956816.1	1655	ENSSSCP00000009377.3	874	EQ,Nc,Sm,Smfr,Smlo,	LIMCH1,LIM and calponin homology domains-containing protein 1 isoform X3
hum:NP_001035089.1	1651	Susscr4EVm000506t12	1695	ncbi:XP_020941446.1	1695	ENSSSCP00000032558.1	1613	EQ,Nc,Sm,na	AFDN,0
hum:NP_001278796.1	1651	Susscr4EVm000514t2	1532	ncbi:XP_001924506.2	1658	ENSSSCP00000030656.2	1475	Nc,Ev,Sm,Smlo,	NHS,Nance-Horan syndrome protein isoform 3
hum:XP_016883237.1	1651	Susscr4EVm000368t1	1019	ncbi:XP_013840750.1	1019	ENSSSCP00000037766.1	1019	EQ,Nc,Sm,na	NCOA6,nuclear receptor coactivator 6 isoform X13
hum:NP_542412.2	1650	Susscr4EVm000619t1	1737	ncbi:XP_020954165.1	1766	ENSSSCP00000029039.2	1737	Nc,Ev,Sm,na	COL11A2,collagen alpha-2(XI) chain isoform 2 preproprotein
hum:XP_011533461.1	1650	Susscr4EVm007674t1	510	ncbi:XP_020921066.1	1632	ENSSSCP00000010221.3	1636	EQ,Nc,Ev,Evfr,Evlo,	RNF17,RING finger protein 17 isoform X6
hum:XP_016883922.1	1650	Susscr4EVm000629t9	1199	ncbi:XP_020944020.1	1211	ENSSSCP00000053096.1	1209	EQ,Sm,Ev,na	ITSN1,intersectin-1 isoform X6
hum:XP_024302137.1	1650	Susscr4EVm000750t1	1754	ncbi:XP_020946256.1	1754	ENSSSCP00000004621.3	1679	EQ,Nc,Sm,na	RIMS1,regulating synaptic membrane exocytosis protein 1 isoform X1
hum:XP_024304513.1	1650	Susscr4EVm000715t9	1664	ncbi:XP_020940831.1	1650	ENSSSCP00000033897.1	1650	Ev,Nc,Sm,na	MADD,MAP kinase-activating death domain protein isoform X1
hum:NP_001013725.2	1649	Susscr4EVm000638t1	1699	ncbi:XP_020953532.1	1640	ENSSSCP00000055116.1	1640	Ev,Nc,Sm,na	EIF2AK4,eIF-2-alpha kinase GCN2
hum:NP_001273510.1	1649	Susscr4EVm000605t18	1060	ncbi:XP_003122440.3	1032	ENSSSCP00000027610.1	1032	Ev,Nc,Sm,na	PHRF1,PHD and RING finger domain-containing protein 1 isoform 1
hum:XP_011534220.1	1649	Susscr4EVm000499t1	1650	ncbi:XP_020947836.1	1650	ENSSSCP00000004824.3	1650	EQ,Nc,Sm,na	PHIP,PH-interacting protein isoform X2
hum:XP_011537670.1	1649	Susscr4EVm000658t3	1723	ncbi:XP_020928205.1	1725	ENSSSCP00000049122.1	1715	EQ,Ev,Sm,na	USP54,inactive ubiquitin carboxyl-terminal hydrolase 54 isoform X7
hum:NP_055690.1	1648	Susscr4EVm000711t1	1639	ncbi:XP_020920156.1	1639	ENSSSCP00000052264.1	1651	Sm,Ev,Nc,na	KIF14,kinesin-like protein KIF14 isoform 1
hum:NP_065952.2	1648	Susscr4EVm000605t18	1060	ncbi:XP_005652843.1	1032	ENSSSCP00000027610.1	1032	Ev,Nc,Sm,na	PHRF1,PHD and RING finger domain-containing protein 1 isoform 2
hum:NP_003673.3	1647	Susscr4EVm000715t9	1661	ncbi:XP_020940832.1	1650	ENSSSCP00000053153.1	1650	Ev,Nc,Sm,na	MADD,MAP kinase-activating death domain protein isoform d
hum:NP_001009881.1	1645	Susscr4EVm000644t1	1690	ncbi:XP_020952296.1	1670	ENSSSCP00000004175.3	1670	Ev,Nc,Sm,na	ZCCHC11,terminal uridylyltransferase 4 isoform a
hum:XP_005250691.1	1645	Susscr4EVm000685t1	1637	ncbi:XP_020934312.1	1637	ENSSSCP00000053351.1	1638	EQ,Ev,Nc,na	CTTNBP2,cortactin-binding protein 2 isoform X1
hum:NP_001231118.1	1644	Susscr4EVm000706t1	1561	ncbi:XP_020958306.1	1552	ENSSSCP00000005454.3	1529	EQ,Nc,Sm,na	KIAA0586,protein TALPID3 isoform 1
hum:XP_016862924.1	1643	Susscr4EVm000126t17	1645	ncbi:XP_020926913.1	1621	ENSSSCP00000020179.2	1640	EQ,Sm,Nc,na	KALRN,kalirin isoform X19
hum:XP_016873967.1	1643	Susscr4EVm000715t9	1661	ncbi:XP_020940834.1	1650	ENSSSCP00000053153.1	1650	Ev,Nc,Sm,na	MADD,MAP kinase-activating death domain protein isoform X5
hum:NP_061142.2	1642	Susscr4EVm000649t11	1651	ncbi:XP_020923748.1	1693	ENSSSCP00000025011.2	1693	EQ,Sm,Ev,na	ABCA5,ATP-binding cassette sub-family A member 5
hum:XP_011524491.1	1642	Susscr4EVm000718t8	1681	ncbi:XP_020951932.1	1651	ENSSSCP00000026817.2	1651	Ev,Nc,Sm,na	FHOD3,FH1/FH2 domain-containing protein 3 isoform X1
hum:XP_024303112.1	1642	Susscr4EVm000750t4	1664	ncbi:XP_020928614.1	1727	ENSSSCP00000035737.1	1727	EQ,Sm,Ev,na	RIMS2,regulating synaptic membrane exocytosis protein 2 isoform X7
hum:XP_024309042.1	1642	Susscr4EVm000771t1	1676	ncbi:XP_020940121.1	1676	ENSSSCP00000014980.3	1676	EQ,Nc,Sm,na	IQGAP3,ras GTPase-activating-like protein IQGAP3 isoform X2
hum:NP_001334926.1	1641	Susscr4EVm000206t9	1107	ncbi:XP_020922861.1	1046	ENSSSCP00000033331.1	1046	Ev,Nc,Sm,na	ZNF462,zinc finger protein 462 isoform 2
hum:NP_001191354.1	1640	Susscr4EVm001509t10	1185	ncbi:XP_020921557.1	1180	ENSSSCP00000041903.1	982	EQ,Nc,Sm,Smlo,	BIVM,BIVM-ERCC5 protein
hum:NP_009029.3	1640	Susscr4EVm000665t2	1643	ncbi:XP_020921707.1	1645	ENSSSCP00000023127.2	1645	EQ,Sm,Ev,na	CLTCL1,clathrin heavy chain 2 isoform 1
hum:XP_016858168.1	1640	Susscr4EVm000493t2	1661	ncbi:XP_020953298.1	1696	ENSSSCP00000003812.3	1668	Nc,Sm,Ev,na	EIF4G3,eukaryotic translation initiation factor 4 gamma 3 isoform X9
hum:XP_024310113.1	1640	Susscr4EVm000575t1	1624	ncbi:XP_020941056.1	1624	ENSSSCP00000026530.2	1512	EQ,Nc,Sm,na	CHD1,chromodomain-helicase-DNA-binding protein 1 isoform X3
hum:NP_001122105.1	1639	Susscr4EVm000937t15	742	ncbi:XP_001926988.2	1646	ENSSSCP00000010762.3	1529	Nc,Sm,Ev,Evfr,Evlo,	RIMBP3C,RIMS-binding protein 3C
hum:XP_011530082.1	1639	Susscr4EVm000743t1	1569	ncbi:XP_020957145.1	1569	ENSSSCP00000053003.1	1569	EQ,Nc,Sm,na	TMEM131L,transmembrane protein 131-like isoform X1
hum:XP_011543259.1	1639	Susscr4EVm000895t1	1188	ncbi:XP_020938534.1	1188	ENSSSCP00000053942.1	807	EQ,Nc,Sm,Smlo,	CCDC88B,coiled-coil domain-containing protein 88B isoform X1
hum:XP_016867371.1	1639	Susscr4EVm000767t1	1591	ncbi:XP_020934800.1	1644	ENSSSCP00000039844.1	1606	Nc,Sm,Ev,na	HECW1,E3 ubiquitin-protein ligase HECW1 isoform X1
hum:NP_055641.3	1638	Susscr4EVm000552t1	1818	ncbi:XP_020920079.1	1850	ENSSSCP00000036649.1	1850	EQ,Sm,Ev,na	CDC42BPA,serine/threonine-protein kinase MRCK alpha isoform A
hum:XP_011536091.1	1638	Susscr4EVm000370t7	1651	ncbi:XP_020929199.1	1638	ENSSSCP00000010502.3	1638	Ev,Nc,Sm,na	CIT,citron Rho-interacting kinase isoform X10
hum:NP_001239029.1	1637	Susscr4EVm000671t1	1660	ncbi:XP_013853381.2	1660	ENSSSCP00000043677.1	1644	EQ,Nc,Sm,na	KIF21B,kinesin-like protein KIF21B isoform 1
hum:NP_001316067.1	1637	Susscr4EVm000433t3	1726	ncbi:XP_020952516.1	1708	ENSSSCP00000022682.2	1650	Ev,Nc,Sm,na	PTPRF,receptor-type tyrosine-protein phosphatase F isoform 4 precursor
hum:XP_011518405.1	1637	Susscr4EVm000480t3	1669	ncbi:XP_020940889.1	1637	ENSSSCP00000014076.3	1637	Ev,Nc,Sm,na	LRP4,low-density lipoprotein receptor-related protein 4 isoform X2
hum:XP_016866576.1	1637	Susscr4EVm000704t41	1640	ncbi:XP_005659233.1	1641	ENSSSCP00000041238.1	1641	EQ,Sm,Ev,na	NHSL1,NHS-like protein 1 isoform X3
hum:NP_056281.1	1636	Susscr4EVm000656t1	1707	ncbi:XP_020924385.1	1693	ENSSSCP00000042659.1	1567	Ev,Nc,Sm,na	PTPN23,tyrosine-protein phosphatase non-receptor type 23 isoform 1
hum:XP_006722680.1	1636	Susscr4EVm000253t4	1748	ncbi:NP_001304009.1	1637	ENSSSCP00000005818.3	1637	Ev,Nc,Sm,na	ABCA7,ATP-binding cassette sub-family A member 7 isoform X10
hum:XP_011525679.1	1635	Susscr4EVm000292t10	1585	ncbi:XP_020950058.1	1585	ENSSSCP00000055818.1	1482	EQ,Nc,Sm,na	LTBP4,latent-transforming growth factor beta-binding protein 4 isoform X2
hum:NP_001337004.1	1634	Susscr4EVm000477t1	1704	ncbi:XP_020924561.1	1704	ENSSSCP00000056359.1	1704	EQ,Nc,Sm,na	PBRM1,protein polybromo-1 isoform 6
hum:NP_002637.3	1634	Susscr4EVm000679t1	1632	ncbi:XP_003357437.4	1634	ENSSSCP00000016208.3	1634	EQ,Sm,Ev,na	PIK3C2B,phosphatidylinositol 4-phosphate 3-kinase C2 domain-containing subunit beta
hum:NP_955372.2	1634	Susscr4EVm000331t14	1987	ncbi:XP_003358058.4	1585	ENSSSCP00000018357.3	657	Ev,Nc,Sm,Nclo,Smfr,Smlo,	LRRC37A3,leucine-rich repeat-containing protein 37A3 isoform 1 precursor
hum:XP_011523673.1	1634	Susscr4EVm000712t1	1617	ncbi:XP_020922964.1	1601	ENSSSCP00000057262.1	1613	EQ,Sm,Nc,na	USP32,ubiquitin carboxyl-terminal hydrolase 32 isoform X1
hum:XP_024306297.1	1634	Susscr4EVm000684t1	1651	ncbi:XP_020923748.1	1674	ENSSSCP00000025011.2	1674	EQ,Sm,Ev,na	ABCA9,ATP-binding cassette sub-family A member 9 isoform X1
hum:NP_001274689.1	1633	Susscr4EVm000112t3	1798	ncbi:XP_020921567.1	1765	ENSSSCP00000010191.3	1765	Ev,Nc,Sm,na	COL4A6,collagen alpha-6(IV) chain isoform 5 precursor
hum:XP_016867673.1	1633	Susscr4EVm000631t1	1725	ncbi:XP_013846251.1	1698	ENSSSCP00000020592.2	1698	Ev,Nc,Sm,na	KCP,kielin/chordin-like protein isoform X1
hum:NP_001124295.1	1632	Susscr4EVm000681t1	1625	ncbi:NP_001027526.1	1633	ENSSSCP00000040267.1	1600	EQ,Ev,Sm,na	DNMT1,DNA (cytosine-5)-methyltransferase 1 isoform a
hum:NP_001293009.1	1631	Susscr4EVm000557t3	1629	ncbi:XP_020921351.1	1750	ENSSSCP00000049501.1	1632	Nc,Sm,Ev,na	LMO7,LIM domain only protein 7 isoform 3
hum:XP_016865394.1	1631	Susscr4EVm000745t1	1634	ncbi:XP_020932639.1	1634	ENSSSCP00000051844.1	1478	EQ,Nc,Sm,na	ADAMTS12,A disintegrin and metalloproteinase with thrombospondin motifs 12 isoform X1
hum:NP_938011.1	1630	Susscr4EVm000514t2	1532	ncbi:XP_005673517.1	1658	ENSSSCP00000030656.2	1475	Nc,Ev,Sm,Smlo,	NHS,Nance-Horan syndrome protein isoform 1
hum:XP_016869183.1	1630	Susscr4EVm000731t1	1665	ncbi:XP_020928492.1	1645	ENSSSCP00000054635.1	1632	Ev,Nc,Sm,na	ADGRB1,adhesion G protein-coupled receptor B1 isoform X4
hum:NP_542410.2	1629	Susscr4EVm000549t1	1681	ncbi:XP_013833187.1	1677	ENSSSCP00000030976.2	1677	EQ,Nc,Sm,na	COL11A2,collagen alpha-2(XI) chain isoform 3 preproprotein
hum:XP_006713140.1	1629	Susscr4EVm000593t1	1679	ncbi:XP_013837254.1	1679	ENSSSCP00000025328.2	1502	EQ,Nc,Sm,Smlo,	FAM208A,protein TASOR isoform X2
hum:XP_016858176.1	1629	Susscr4EVm000493t2	1661	ncbi:XP_020953300.1	1689	ENSSSCP00000003812.3	1668	Nc,Sm,Ev,na	EIF4G3,eukaryotic translation initiation factor 4 gamma 3 isoform X15
hum:XP_011526950.1	1628	Susscr4EVm000791t4	1531	ncbi:XP_020933085.1	1527	ENSSSCP00000007717.3	1527	EQ,Nc,Sm,na	ASXL1,putative Polycomb group protein ASXL1 isoform X1
hum:NP_002572.2	1627	Susscr4EVm000708t2	1642	ncbi:XP_001926788.5	1628	ENSSSCP00000016447.3	1548	Ev,Nc,Sm,na	PAPPA,pappalysin-1 preproprotein
hum:NP_443141.4	1627	Susscr4EVm002268t2	1131	ncbi:XP_020932485.1	1526	ENSSSCP00000055887.1	1125	Nc,Ev,Sm,Evlo,Smlo,	PLEKHG4B,pleckstrin homology domain-containing family G member 4B
hum:XP_005254311.1	1627	Susscr4EVm000100t22	1672	ncbi:XP_020953037.1	1599	ENSSSCP00000005109.3	1625	Ev,Sm,Nc,na	MGA,MAX gene-associated protein isoform X10
hum:XP_005269924.1	1627	Susscr4EVm000008t34	1603	ncbi:XP_020927861.1	1780	ENSSSCP00000045243.1	1780	EQ,Sm,Ev,na	NRAP,nebulin-related-anchoring protein isoform X5
hum:XP_006712309.1	1627	Susscr4EVm000112t8	1782	ncbi:XP_020921567.1	1739	ENSSSCP00000010191.3	1739	Ev,Nc,Sm,na	COL4A4,collagen alpha-4(IV) chain isoform X6
hum:XP_016875745.1	1627	Susscr4EVm000313t2	1648	ncbi:XP_020929741.1	1648	ENSSSCP00000046644.1	1648	EQ,Nc,Sm,na	KNTC1,kinetochore-associated protein 1 isoform X6
hum:XP_016880818.1	1627	Susscr4EVm000937t15	1302	ncbi:XP_020922932.1	1302	ENSSSCP00000030467.2	1299	EQ,Nc,Sm,na	TSPOAP1,peripheral-type benzodiazepine receptor-associated protein 1 isoform X9
hum:NP_001317629.1	1626	Susscr4EVm000724t1	1626	ncbi:NP_001245315.1	1626	ENSSSCP00000011962.3	1626	EQ,Nc,Sm,na	TOP2B,DNA topoisomerase 2-beta isoform 1
hum:NP_690848.1	1626	Susscr4EVm000741t1	1603	ncbi:XP_020944522.1	1603	ENSSSCP00000036044.1	1594	EQ,Nc,Sm,na	COL22A1,collagen alpha-1(XXII) chain precursor
hum:XP_011517730.1	1626	Susscr4EVm000765t1	1614	ncbi:XP_020920733.1	1598	ENSSSCP00000011911.3	1596	Ev,Nc,Sm,na	DIP2C,disco-interacting protein 2 homolog C isoform X1
hum:XP_011541221.1	1626	Susscr4EVm000553t4	1563	ncbi:XP_020927156.1	1646	ENSSSCP00000012852.3	1653	EQ,Nc,Ev,na	DSCAML1,Down syndrome cell adhesion molecule-like protein 1 isoform X3
hum:XP_011534271.1	1625	Susscr4EVm000704t40	1627	ncbi:XP_020943053.1	1627	ENSSSCP00000053775.1	1626	EQ,Nc,Sm,na	NHSL1,NHS-like protein 1 isoform X5
hum:XP_016873968.1	1625	Susscr4EVm000715t9	1643	ncbi:XP_020940835.1	1650	ENSSSCP00000033897.1	1643	EQ,Ev,Sm,na	MADD,MAP kinase-activating death domain protein isoform X6
hum:XP_011527632.1	1623	Susscr4EVm000001t12	1634	ncbi:XP_020931560.1	1627	ENSSSCP00000051927.1	1429	EQ,Nc,Sm,Smlo,	SIGLEC1,sialoadhesin isoform X3
hum:XP_011538153.1	1623	Susscr4EVm000278t8	1630	ncbi:XP_020929664.1	1613	ENSSSCP00000047948.1	1613	Ev,Nc,Sm,na	PLCE1,1-phosphatidylinositol 4,5-bisphosphate phosphodiesterase epsilon-1 isoform X7
hum:XP_016858180.1	1623	Susscr4EVm000493t1	1661	ncbi:XP_020953298.1	1696	ENSSSCP00000003812.3	1631	Nc,Ev,Sm,na	EIF4G3,eukaryotic translation initiation factor 4 gamma 3 isoform X18
hum:NP_001303238.1	1622	Susscr4EVm003646t1	835	ncbi:XP_020946206.1	1660	ENSSSCP00000006325.3	1645	Nc,Sm,Ev,Evfr,Evlo,	WDR97,WD repeat-containing protein 97
hum:NP_001307366.1	1622	Susscr4EVm000658t1	1698	ncbi:XP_020928205.1	1703	ENSSSCP00000049122.1	1688	EQ,Ev,Sm,na	USP54,inactive ubiquitin carboxyl-terminal hydrolase 54 isoform 2
hum:XP_005252485.1	1622	Susscr4EVm000765t1	1647	ncbi:XP_020947317.1	1638	ENSSSCP00000050298.1	1622	EQ,Nc,Sm,na	DIP2C,disco-interacting protein 2 homolog C isoform X2
hum:XP_011540676.1	1622	Susscr4EVm000493t2	1661	ncbi:XP_020953304.1	1678	ENSSSCP00000045726.1	1661	Nc,Ev,Sm,na	EIF4G3,eukaryotic translation initiation factor 4 gamma 3 isoform X19
hum:XP_024306917.1	1622	Susscr4EVm000737t1	1632	ncbi:XP_020948095.1	1634	ENSSSCP00000004844.2	1632	EQ,Ev,Sm,na	SETBP1,SET-binding protein isoform X1
hum:NP_005637.3	1621	Susscr4EVm000729t1	1625	ncbi:XP_005671024.1	1634	ENSSSCP00000010836.3	1625	EQ,Ev,Sm,na	TARBP1,probable methyltransferase TARBP1
hum:NP_006608.1	1621	Susscr4EVm000707t1	1670	ncbi:XP_005663322.1	1670	ENSSSCP00000025811.2	1670	EQ,Nc,Sm,na	NES,nestin
hum:NP_001073991.2	1620	Susscr4EVm000717t1	1620	ncbi:XP_003128908.4	1620	ENSSSCP00000009313.3	1569	EQ,Nc,Sm,na	CC2D2A,coiled-coil and C2 domain-containing protein 2A isoform a
hum:NP_004295.2	1620	Susscr4EVm002719t1	902	ncbi:XP_020943328.1	1583	ENSSSCP00000030260.2	1212	Nc,Sm,Ev,Smlo,Evfr,Evlo,	ALK,ALK tyrosine kinase receptor isoform 1 precursor
hum:XP_011523674.1	1620	Susscr4EVm000712t1	1617	ncbi:XP_020922965.1	1591	ENSSSCP00000057262.1	1613	EQ,Sm,Nc,na	USP32,ubiquitin carboxyl-terminal hydrolase 32 isoform X2
hum:NP_001337003.1	1618	Susscr4EVm000477t3	1730	ncbi:XP_020924565.1	1668	ENSSSCP00000036651.1	1673	Ev,Sm,Nc,na	PBRM1,protein polybromo-1 isoform 5
hum:XP_006721030.1	1618	Susscr4EVm000260t5	1556	ncbi:XP_020922827.1	1579	ENSSSCP00000031360.1	1536	Nc,Ev,Sm,na	CACNA1H,voltage-dependent T-type calcium channel subunit alpha-1H isoform X8
hum:NP_001337005.1	1617	Susscr4EVm000477t10	1677	ncbi:XP_020924565.1	1668	ENSSSCP00000036651.1	1673	EQ,Sm,Nc,na	PBRM1,protein polybromo-1 isoform 7
hum:NP_001640.1	1616	Susscr4EVm000487t12	1656	ncbi:XP_020935306.1	1650	ENSSSCP00000012885.3	1655	EQ,Sm,Nc,na	SHROOM2,protein Shroom2 isoform 1
hum:NP_059129.3	1616	Susscr4EVm000722t1	1625	ncbi:XP_020920564.1	1624	ENSSSCP00000011795.3	1622	EQ,Nc,Sm,na	MYO3A,myosin-IIIa
hum:XP_006713340.1	1615	Susscr4EVm000677t5	1665	ncbi:XP_020927047.1	1643	ENSSSCP00000052686.1	1615	Ev,Nc,Sm,na	ROBO1,roundabout homolog 1 isoform X4
hum:XP_016856643.1	1615	Susscr4EVm000928t1	1454	ncbi:XP_020945847.1	1454	ENSSSCP00000056013.1	1454	EQ,Nc,Sm,na	CCDC18,coiled-coil domain-containing protein 18 isoform X1
hum:NP_002327.2	1613	Susscr4EVm000701t1	1632	ncbi:XP_020938380.1	1614	ENSSSCP00000030683.2	1474	Ev,Nc,Sm,na	LRP6,low-density lipoprotein receptor-related protein 6 precursor
hum:XP_005263453.1	1613	Susscr4EVm000744t1	1635	ncbi:XP_020936867.1	1621	ENSSSCP00000036084.1	1620	Ev,Nc,Sm,na	CAMSAP1,calmodulin-regulated spectrin-associated protein 1 isoform X1
hum:XP_011528618.1	1613	Susscr4EVm000948t1	1460	ncbi:XP_020947068.1	1461	ENSSSCP00000036435.1	299	EQ,Ev,Sm,Smfr,Smlo,	EFCAB6,EF-hand calcium-binding domain-containing protein 6 isoform X1
hum:NP_003886.3	1612	Susscr4EVm000825t1	1600	ncbi:XP_013838015.2	1655	ENSSSCP00000059529.1	1596	Nc,Ev,Sm,na	SYNJ1,synaptojanin-1 isoform a
hum:NP_001317582.1	1610	Susscr4EVm000753t1	1610	ncbi:XP_020921245.1	1611	ENSSSCP00000005698.3	1526	EQ,Ev,Sm,na	UNC13B,protein unc-13 homolog B isoform 2
hum:NP_060887.2	1610	Susscr4EVm002401t1	976	ncbi:NP_001191321.1	1612	ENSSSCP00000006722.2	1612	EQ,Sm,Ev,Evfr,Evlo,	ADCY10,adenylate cyclase type 10 isoform 1
hum:XP_011534274.1	1610	Susscr4EVm000704t40	1615	ncbi:XP_005659233.1	1615	ENSSSCP00000041238.1	1615	EQ,Nc,Sm,na	NHSL1,NHS-like protein 1 isoform X9
hum:NP_002284.3	1609	Susscr4EVm000576t1	1818	ncbi:XP_003130317.3	1766	ENSSSCP00000016375.3	1751	Ev,Nc,Sm,na	LAMC1,laminin subunit gamma-1 precursor
hum:NP_005913.2	1608	Susscr4EVm000739t1	1562	ncbi:XP_020941883.1	1562	ENSSSCP00000025740.2	1558	EQ,Nc,Sm,na	MAP3K4,mitogen-activated protein kinase kinase kinase 4 isoform a
hum:NP_055940.3	1608	Susscr4EVm000212t14	1621	ncbi:XP_020950082.1	1589	ENSSSCP00000003278.3	1611	Ev,Sm,Nc,na	CIC,protein capicua homolog isoform CIC-S
hum:NP_569829.2	1608	Susscr4EVm000715t2	1629	ncbi:XP_020940832.1	1650	ENSSSCP00000033897.1	1647	EQ,Sm,Ev,na	MADD,MAP kinase-activating death domain protein isoform e
hum:XP_016869186.1	1608	Susscr4EVm000773t8	1763	ncbi:XP_013854551.2	1724	ENSSSCP00000039903.1	1724	Ev,Nc,Sm,na	ADGRB1,adhesion G protein-coupled receptor B1 isoform X7
hum:XP_005249722.1	1607	Susscr4EVm000767t1	1591	ncbi:XP_020934801.1	1612	ENSSSCP00000039844.1	1612	EQ,Sm,Ev,na	HECW1,E3 ubiquitin-protein ligase HECW1 isoform X5
hum:XP_011527794.1	1607	Susscr4EVm000667t1	1650	ncbi:XP_020920733.1	1640	ENSSSCP00000050298.1	1636	Ev,Nc,Sm,na	DIP2A,disco-interacting protein 2 homolog A isoform X1
hum:XP_016873969.1	1607	Susscr4EVm000715t2	1629	ncbi:XP_020940835.1	1650	ENSSSCP00000033897.1	1646	EQ,Sm,Ev,na	MADD,MAP kinase-activating death domain protein isoform X8
hum:NP_001181875.1	1606	Susscr4EVm000689t1	1613	ncbi:XP_020924254.1	1659	ENSSSCP00000037957.1	1612	Nc,Ev,Sm,na	EIF4G1,eukaryotic translation initiation factor 4 gamma 1 isoform 6
hum:NP_079146.2	1606	Susscr4EVm000696t1	1627	ncbi:XP_020933699.1	1627	ENSSSCP00000035207.1	1629	EQ,Ev,Nc,na	PREX2,phosphatidylinositol 3,4,5-trisphosphate-dependent Rac exchanger 2 protein isoform a
hum:XP_011515185.1	1606	Susscr4EVm000112t8	1982	ncbi:XP_020944522.1	1583	ENSSSCP00000036044.1	1574	Ev,Nc,Sm,Nclo,Smlo,	COL22A1,collagen alpha-1(XXII) chain isoform X1
hum:XP_016861506.1	1606	Susscr4EVm000157t5	1620	ncbi:XP_020930765.1	1620	ENSSSCP00000055237.1	1620	EQ,Nc,Sm,na	NBEAL2,neurobeachin-like protein 2 isoform X9
hum:XP_016873970.1	1605	Susscr4EVm000715t2	1629	ncbi:XP_020940831.1	1647	ENSSSCP00000033897.1	1643	EQ,Sm,Ev,na	MADD,MAP kinase-activating death domain protein isoform X11
hum:XP_024308198.1	1605	Susscr4EVm000471t11	1609	ncbi:XP_020935609.1	1604	ENSSSCP00000044827.1	1477	EQ,Nc,Sm,na	TAF1,transcription initiation factor TFIID subunit 1 isoform X5
hum:NP_001847.3	1604	Susscr4EVm000680t1	1666	ncbi:XP_020951434.1	1652	ENSSSCP00000031142.1	1652	Ev,Nc,Sm,na	COL16A1,collagen alpha-1(XVI) chain precursor
hum:XP_005250207.1	1604	Susscr4EVm000449t2	1645	ncbi:XP_020941924.1	1645	ENSSSCP00000048247.1	1404	EQ,Nc,Sm,Smlo,	CUX1,protein CASP isoform X1
hum:XP_016873686.1	1604	Susscr4EVm000760t1	1638	ncbi:XP_020947901.1	1605	ENSSSCP00000031623.1	1605	Ev,Nc,Sm,na	ABCC8,ATP-binding cassette sub-family C member 8 isoform X1
hum:NP_001025053.1	1603	Susscr4EVm000738t1	1605	ncbi:XP_020951301.1	1605	ENSSSCP00000051154.1	1478	EQ,Nc,Sm,na	AHDC1,AT-hook DNA-binding motif-containing protein 1
hum:NP_001229825.1	1603	Susscr4EVm000688t1	1633	ncbi:XP_001928033.1	1603	ENSSSCP00000010704.2	1603	Ev,Nc,Sm,na	DEPDC5,GATOR complex protein DEPDC5 isoform 4
hum:NP_001291362.1	1603	Susscr4EVm000426t1	665	ncbi:XP_020921064.1	500	0	0	Ev,Nc,Sm,Nclo,Smmi,Smlo,	LOC101928841,uncharacterized protein LOC101928841
hum:NP_001338224.1	1603	Susscr4EVm000760t1	1637	ncbi:XP_005661159.2	1604	ENSSSCP00000031623.1	1604	Ev,Nc,Sm,na	ABCC8,ATP-binding cassette sub-family C member 8 isoform 3
hum:XP_011539187.1	1603	Susscr4EVm000713t4	1597	ncbi:XP_020950871.1	1586	ENSSSCP00000028064.2	1586	Ev,Nc,Sm,na	MEGF6,multiple epidermal growth factor-like domains protein 6 isoform X1
hum:XP_016871472.1	1603	Susscr4EVm000666t5	1640	ncbi:XP_020928397.1	459	ENSSSCP00000011266.3	459	Ev,Nc,Sm,Ncfr,Nclo,Smfr,Smlo,	PPRC1,peroxisome proliferator-activated receptor gamma coactivator-related protein 1 isoform X5
hum:XP_016880469.1	1603	Susscr4EVm000622t38	1643	ncbi:XP_020923139.1	1603	ENSSSCP00000048930.1	1603	Ev,Nc,Sm,na	SUPT6H,transcription elongation factor SPT6 isoform X2
hum:XP_005268192.1	1602	Susscr4EVm000727t1	1585	ncbi:XP_020954883.1	1585	ENSSSCP00000031599.1	1585	EQ,Nc,Sm,na	ZFHX2,zinc finger homeobox protein 2 isoform X4
hum:XP_016869592.1	1601	Susscr4EVm000650t1	1605	ncbi:XP_020945029.1	1605	ENSSSCP00000032179.1	1605	EQ,Nc,Sm,na	RB1CC1,RB1-inducible coiled-coil protein 1 isoform X1
hum:XP_011543333.1	1600	Susscr4EVm000031t98	1491	ncbi:XP_020938381.1	1481	ENSSSCP00000030683.2	1401	Ev,Nc,Sm,na	LRP5,low-density lipoprotein receptor-related protein 5 isoform X4
hum:XP_011529743.1	1598	Susscr4EVm137400t1	1490	ncbi:XP_020935442.1	1480	ENSSSCP00000030254.2	1466	Ev,Nc,Sm,na	UTY,histone demethylase UTY isoform X1
hum:NP_005426.2	1597	Susscr4EVm000762t1	1616	ncbi:XP_020919258.1	1609	ENSSSCP00000026259.2	1609	EQ,Nc,Sm,na	ARHGEF5,rho guanine nucleotide exchange factor 5
hum:XP_011532283.1	1597	Susscr4EVm000794t2	1575	ncbi:XP_020927044.1	1597	ENSSSCP00000022197.2	1450	Nc,Ev,Sm,na	ROBO2,roundabout homolog 2 isoform X1
hum:NP_056374.2	1596	Susscr4EVm000737t1	1606	ncbi:XP_013844009.2	1628	ENSSSCP00000004844.2	1606	Nc,Ev,Sm,na	SETBP1,SET-binding protein isoform a
hum:XP_016883986.1	1596	Susscr4EVm000825t1	1570	ncbi:XP_013838012.2	1625	ENSSSCP00000059529.1	1566	Nc,Ev,Sm,na	SYNJ1,synaptojanin-1 isoform X4
hum:XP_011510426.1	1595	Susscr4EVm000343t3	1585	ncbi:XP_020944057.1	1613	ENSSSCP00000021789.2	1553	Nc,Ev,Sm,na	FER1L5,fer-1-like protein 5 isoform X13
hum:XP_011525681.1	1595	Susscr4EVm000292t27	1601	ncbi:XP_020950058.1	1516	ENSSSCP00000055818.1	1595	EQ,Sm,Nc,na	LTBP4,latent-transforming growth factor beta-binding protein 4 isoform X4
hum:NP_001129501.1	1594	Susscr4EVm000688t1	1624	ncbi:XP_003359204.1	1603	ENSSSCP00000010704.2	1603	Ev,Nc,Sm,na	DEPDC5,GATOR complex protein DEPDC5 isoform 3
hum:XP_016857374.1	1594	Susscr4EVm000874t1	1542	ncbi:XP_020952143.1	1574	ENSSSCP00000048128.1	1145	Nc,Ev,Sm,Smlo,	LRRC7,leucine-rich repeat-containing protein 7 isoform X1
hum:XP_006721088.1	1592	Susscr4EVm000692t10	1639	ncbi:XP_020942099.1	1639	ENSSSCP00000029612.2	1619	EQ,Nc,Sm,na	KIAA0556,protein KIAA0556 isoform X10
hum:XP_016858187.1	1592	Susscr4EVm000493t1	1630	ncbi:XP_020953300.1	1689	ENSSSCP00000003812.3	1631	Nc,Sm,Ev,na	EIF4G3,eukaryotic translation initiation factor 4 gamma 3 isoform X24
hum:NP_001340617.1	1591	Susscr4EVm000752t1	1592	ncbi:XP_020926561.1	1592	ENSSSCP00000033077.1	1592	EQ,Nc,Sm,na	TIAM1,T-lymphoma invasion and metastasis-inducing protein 1 isoform 1
hum:NP_001276325.1	1590	Susscr4EVm000736t3	1617	ncbi:XP_020919950.1	1590	ENSSSCP00000054457.1	1590	Ev,Nc,Sm,na	SMARCA2,probable global transcription activator SNF2L2 isoform a
hum:XP_011519396.1	1590	Susscr4EVm000770t1	1570	ncbi:XP_020921450.1	1578	ENSSSCP00000010148.3	1535	EQ,Ev,Sm,na	UGGT2,UDP-glucose:glycoprotein glucosyltransferase 2 isoform X1
hum:NP_001180236.1	1589	Susscr4EVm000740t1	1590	ncbi:XP_005667662.1	1590	ENSSSCP00000021280.1	1590	EQ,Nc,Sm,na	SAMD9,sterile alpha motif domain-containing protein 9
hum:NP_062830.1	1589	Susscr4EVm000691t4	1592	ncbi:XP_005665357.1	1592	ENSSSCP00000021846.2	1592	EQ,Nc,Sm,na	MYOM1,myomesin-1 isoform b
hum:XP_011530727.1	1589	Susscr4EVm000714t1	1603	ncbi:XP_020941066.1	1598	ENSSSCP00000054291.1	1591	EQ,Nc,Sm,na	RAPGEF2,rap guanine nucleotide exchange factor 2 isoform X7
hum:XP_016858071.1	1589	Susscr4EVm000577t20	1670	ncbi:XP_020920089.1	1651	ENSSSCP00000050324.1	1632	Ev,Nc,Sm,na	CDC42BPA,serine/threonine-protein kinase MRCK alpha isoform X16
hum:XP_024305549.1	1589	Susscr4EVm000706t6	1610	ncbi:XP_020958306.1	1601	ENSSSCP00000005454.3	1601	EQ,Nc,Sm,na	KIAA0586,protein TALPID3 isoform X3
hum:NP_001139656.1	1588	Susscr4EVm000884t1	1513	ncbi:XP_020950793.1	1513	ENSSSCP00000047352.1	1179	EQ,Nc,Sm,Smlo,	PEG3,paternally-expressed gene 3 protein isoform 1
hum:XP_011513495.1	1588	Susscr4EVm000735t1	1592	ncbi:XP_020931280.1	1592	ENSSSCP00000020719.2	1588	EQ,Nc,Sm,na	THSD7A,thrombospondin type-1 domain-containing protein 7A isoform X2
hum:XP_011515187.1	1588	Susscr4EVm000112t8	1970	ncbi:XP_020951436.1	1514	ENSSSCP00000033997.1	1514	Ev,Nc,Sm,Nclo,Smlo,	COL22A1,collagen alpha-1(XXII) chain isoform X3
hum:XP_016859146.1	1588	Susscr4EVm000822t1	1621	ncbi:XP_020927225.1	1640	ENSSSCP00000040711.1	1619	Nc,Ev,Sm,na	CLASP1,CLIP-associating protein 1 isoform X1
hum:XP_011535670.1	1586	Susscr4EVm000662t4	1498	ncbi:XP_020955633.1	1595	ENSSSCP00000026569.2	852	Nc,Ev,Sm,Smfr,Smlo,	NRXN3,neurexin 3 isoform X14
hum:XP_011541005.1	1586	Susscr4EVm000933t1	1569	ncbi:XP_020918584.1	1604	ENSSSCP00000023724.2	1443	Nc,Ev,Sm,Smlo,	PHLDB1,pleckstrin homology-like domain family B member 1 isoform X1
hum:XP_016863418.1	1586	Susscr4EVm000812t33	1596	ncbi:XP_020939358.1	1523	ENSSSCP00000014643.3	1523	Ev,Nc,Sm,na	ADGRL3,adhesion G protein-coupled receptor L3 isoform X1
hum:XP_011526969.1	1585	Susscr4EVm000693t1	1567	ncbi:XP_005672957.1	1569	ENSSSCP00000031619.1	1569	EQ,Sm,Ev,na	EPB41L1,band 4.1-like protein 1 isoform X1
hum:XP_011540150.1	1585	Susscr4EVm000836t1	1629	ncbi:XP_020928492.1	1645	ENSSSCP00000039903.1	1576	Nc,Ev,Sm,na	ADGRB2,adhesion G protein-coupled receptor B2 isoform X1
hum:XP_024303682.1	1585	Susscr4EVm000666t1	1604	ncbi:XP_020928397.1	1604	ENSSSCP00000011266.3	1592	EQ,Nc,Sm,na	PPRC1,peroxisome proliferator-activated receptor gamma coactivator-related protein 1 isoform X6
hum:XP_006715917.1	1583	Susscr4EVm000449t1	1645	ncbi:XP_020941924.1	1645	ENSSSCP00000048247.1	1404	EQ,Nc,Sm,Smlo,	CUX1,protein CASP isoform X2
hum:XP_024306443.1	1583	Susscr4EVm000870t1	1504	ncbi:XP_020923283.1	1574	ENSSSCP00000033676.1	1342	Nc,Ev,Sm,Smlo,	CLUH,clustered mitochondria protein homolog isoform X1
hum:NP_940867.2	1582	Susscr4EVm000815t1	1597	ncbi:XP_020935566.1	1588	ENSSSCP00000013339.3	1587	EQ,Nc,Sm,na	NRK,nik-related protein kinase
hum:XP_016874015.1	1582	Susscr4EVm000263t1	1615	ncbi:XP_020948738.1	1620	ENSSSCP00000026430.2	1619	EQ,Sm,Ev,na	NAV2,neuron navigator 2 isoform X18
hum:NP_004765.2	1581	Susscr4EVm000751t1	1596	ncbi:XP_013835208.1	1581	ENSSSCP00000032904.1	1581	Ev,Nc,Sm,na	MED1,mediator of RNA polymerase II transcription subunit 1
hum:NP_569831.1	1581	Susscr4EVm000715t9	1593	ncbi:XP_020940856.1	1581	ENSSSCP00000033897.1	1579	Ev,Nc,Sm,na	MADD,MAP kinase-activating death domain protein isoform g
hum:XP_011512254.1	1581	Susscr4EVm000617t8	1602	ncbi:XP_020946057.1	1582	ENSSSCP00000017275.3	1568	Ev,Nc,Sm,na	MROH2B,maestro heat-like repeat-containing protein family member 2B isoform X1
hum:XP_011516423.1	1581	Susscr4EVm000601t5	1658	ncbi:NP_001258644.1	1597	ENSSSCP00000006120.3	1562	Ev,Nc,Sm,na	LAMC3,laminin subunit gamma-3 isoform X1
hum:NP_000159.3	1580	Susscr4EVm000759t2	1605	ncbi:XP_020934602.1	1592	ENSSSCP00000048682.1	1592	Ev,Nc,Sm,na	GLI3,transcriptional activator GLI3
hum:NP_001300971.1	1580	Susscr4EVm000766t1	1606	ncbi:XP_020920226.1	1572	ENSSSCP00000011653.3	1572	Ev,Nc,Sm,na	KDM5B,lysine-specific demethylase 5B isoform 1
hum:XP_016863420.1	1580	Susscr4EVm000812t33	1595	ncbi:XP_020939356.1	1521	ENSSSCP00000037086.1	1521	Ev,Nc,Sm,na	ADGRL3,adhesion G protein-coupled receptor L3 isoform X2
hum:XP_016873976.1	1580	Susscr4EVm000715t2	1647	ncbi:XP_020940834.1	1650	ENSSSCP00000053153.1	1650	EQ,Sm,Ev,na	MADD,MAP kinase-activating death domain protein isoform X18
hum:XP_006711722.1	1579	Susscr4EVm000591t1	1578	ncbi:XP_020945298.1	1578	ENSSSCP00000006886.3	1578	EQ,Nc,Sm,na	ARHGEF11,rho guanine nucleotide exchange factor 11 isoform X1
hum:XP_006712709.1	1579	Susscr4EVm000748t1	1605	ncbi:NP_001185853.1	1582	ENSSSCP00000053188.1	1582	Ev,Nc,Sm,na	HECW2,E3 ubiquitin-protein ligase HECW2 isoform X1
hum:NP_055722.2	1578	Susscr4EVm000755t1	1569	ncbi:XP_005660309.2	1583	ENSSSCP00000043616.1	1583	EQ,Sm,Ev,na	FRMPD1,FERM and PDZ domain-containing protein 1
hum:XP_006722279.1	1578	Susscr4EVm000437t1	1601	ncbi:XP_020922402.1	1580	ENSSSCP00000045841.1	1580	Ev,Nc,Sm,na	HELZ,probable helicase with zinc finger domain isoform X5
hum:NP_056036.1	1577	Susscr4EVm000768t1	1585	ncbi:XP_001929430.4	1585	ENSSSCP00000040255.1	1585	EQ,Nc,Sm,na	DNMBP,dynamin-binding protein isoform a
hum:NP_001001670.1	1576	Susscr4EVm000730t2	1621	ncbi:XP_005660237.2	1595	ENSSSCP00000056301.1	1602	Ev,Sm,Nc,na	SPATA31D1,spermatogenesis-associated protein 31D1
hum:XP_011529745.1	1576	Susscr4EVm137400t1	1490	ncbi:XP_020935437.1	1466	ENSSSCP00000030254.2	1444	Ev,Nc,Sm,na	UTY,histone demethylase UTY isoform X3
hum:XP_011530398.1	1576	Susscr4EVm000550t5	1295	ncbi:XP_020957320.1	1594	ENSSSCP00000035659.1	1282	Nc,Ev,Sm,Evlo,Smlo,	ZGRF1,protein ZGRF1 isoform X7
hum:XP_016862475.1	1576	Susscr4EVm000794t2	1598	ncbi:XP_020927047.1	1576	ENSSSCP00000052686.1	1461	Ev,Nc,Sm,na	ROBO2,roundabout homolog 2 isoform X2
hum:XP_016874227.1	1576	Susscr4EVm000370t10	1617	ncbi:XP_020929199.1	1617	ENSSSCP00000010502.3	1617	EQ,Nc,Sm,na	CIT,citron Rho-interacting kinase isoform X12
hum:NP_006050.3	1575	Susscr4EVm000601t5	1656	ncbi:XP_020919181.1	1704	ENSSSCP00000006120.3	1556	Nc,Ev,Sm,na	LAMC3,laminin subunit gamma-3 precursor
hum:NP_006624.2	1575	Susscr4EVm000659t1	1693	ncbi:XP_020954569.1	1683	ENSSSCP00000040024.1	1686	EQ,Sm,Nc,na	IQGAP2,ras GTPase-activating-like protein IQGAP2 isoform 1
hum:XP_011511950.1	1574	Susscr4EVm000663t10	1370	ncbi:XP_020956816.1	1152	ENSSSCP00000009377.3	874	Ev,Nc,Sm,Nclo,Smfr,Smlo,	LIMCH1,LIM and calponin homology domains-containing protein 1 isoform X14
hum:NP_001138422.1	1573	Susscr4EVm000761t2	1352	ncbi:XP_020950680.1	1001	ENSSSCP00000053290.1	1441	Sm,Ev,Nc,Nclo,	SSC5D,soluble scavenger receptor cysteine-rich domain-containing protein SSC5D isoform 1 precursor
hum:XP_011539663.2	1573	Susscr4EVm000928t2	1458	ncbi:XP_020945855.1	1458	ENSSSCP00000056013.1	1458	EQ,Nc,Sm,na	CCDC18,coiled-coil domain-containing protein 18 isoform X5
hum:XP_024310104.1	1573	Susscr4EVm000687t1	1638	ncbi:XP_020954569.1	1642	ENSSSCP00000022037.2	1642	EQ,Sm,Ev,na	IQGAP2,ras GTPase-activating-like protein IQGAP2 isoform X1
hum:NP_001340871.1	1572	Susscr4EVm000667t29	1633	ncbi:XP_020938140.1	1611	ENSSSCP00000034119.1	1596	Ev,Nc,Sm,na	DIP2A,disco-interacting protein 2 homolog A isoform h
hum:NP_001140177.1	1570	Susscr4EVm000766t1	1613	ncbi:XP_013841599.1	1585	ENSSSCP00000029482.2	1581	Ev,Nc,Sm,na	KDM5D,lysine-specific demethylase 5D isoform 1
hum:NP_055790.1	1570	Susscr4EVm000776t1	1571	ncbi:XP_020939380.1	1571	ENSSSCP00000056532.1	1571	EQ,Nc,Sm,na	MAST1,microtubule-associated serine/threonine-protein kinase 1
hum:XP_011543457.1	1569	Susscr4EVm000552t9	1730	ncbi:XP_020920087.1	1746	ENSSSCP00000052145.1	1719	Nc,Ev,Sm,na	CDC42BPG,serine/threonine-protein kinase MRCK gamma isoform X1
hum:NP_005752.1	1568	Susscr4EVm000661t4	1583	ncbi:XP_020948416.1	1614	ENSSSCP00000037168.1	1614	EQ,Sm,Ev,na	PLXNC1,plexin-C1 precursor
hum:XP_016858409.1	1568	Susscr4EVm000591t3	1572	ncbi:XP_020945298.1	1578	ENSSSCP00000006886.3	1567	EQ,Ev,Sm,na	ARHGEF11,rho guanine nucleotide exchange factor 11 isoform X5
hum:NP_001336538.1	1567	Susscr4EVm001414t10	994	ncbi:XP_020953179.1	1563	ENSSSCP00000048193.1	1151	Nc,Sm,Ev,Smlo,Evfr,Evlo,	CAMTA1,calmodulin-binding transcription activator 1 isoform e
hum:XP_011539392.1	1567	Susscr4EVm001414t10	974	ncbi:XP_020953181.1	1563	ENSSSCP00000048193.1	1151	Nc,Sm,Ev,Smlo,Evfr,Evlo,	CAMTA1,calmodulin-binding transcription activator 1 isoform X7
hum:NP_001036146.1	1566	Susscr4EVm000782t1	1553	ncbi:XP_020950936.1	1540	ENSSSCP00000032064.1	1526	Ev,Nc,Sm,na	RERE,arginine-glutamic acid dipeptide repeats protein isoform a
hum:XP_005252484.1	1566	Susscr4EVm000667t9	1606	ncbi:XP_020947317.1	1586	ENSSSCP00000034119.1	1585	Ev,Nc,Sm,na	DIP2C,disco-interacting protein 2 homolog C isoform X6
hum:XP_011526107.1	1566	Susscr4EVm000776t1	1548	ncbi:XP_020939379.1	1567	ENSSSCP00000056532.1	1548	Nc,Ev,Sm,na	MAST1,microtubule-associated serine/threonine-protein kinase 1 isoform X1
hum:XP_011534248.1	1566	Susscr4EVm000777t2	1576	ncbi:XP_020942044.1	1570	ENSSSCP00000048773.1	1570	EQ,Nc,Sm,na	TULP4,tubby-related protein 4 isoform X1
hum:XP_016857390.1	1566	Susscr4EVm000773t8	1615	ncbi:XP_020928492.1	1628	ENSSSCP00000039903.1	1576	Nc,Ev,Sm,na	ADGRB2,adhesion G protein-coupled receptor B2 isoform X4
hum:NP_663780.2	1565	Susscr4EVm000756t1	1606	ncbi:XP_020954007.1	1154	ENSSSCP00000050800.1	1565	Ev,Sm,Nc,Nclo,	SYNM,synemin isoform A
hum:XP_011511892.2	1565	Susscr4EVm000856t2	1581	ncbi:XP_020956593.1	1490	ENSSSCP00000023441.2	1327	Ev,Nc,Sm,Smlo,	FAM193A,protein FAM193A isoform X1
hum:XP_011516646.1	1565	Susscr4EVm000253t1	1530	ncbi:XP_020945843.1	1544	ENSSSCP00000007345.3	1540	EQ,Sm,Ev,na	ABCA1,ATP-binding cassette sub-family A member 1 isoform X7
hum:NP_055454.1	1564	Susscr4EVm000746t1	1600	ncbi:XP_020940202.1	1564	ENSSSCP00000053347.1	1564	Ev,Nc,Sm,na	TTC37,tetratricopeptide repeat protein 37
hum:XP_005252032.1	1564	Susscr4EVm000242t9	1564	ncbi:XP_020953993.1	1548	ENSSSCP00000030534.2	1541	Ev,Nc,Sm,na	TNC,tenascin isoform X16
hum:XP_011526231.1	1564	Susscr4EVm000614t1	1373	ncbi:XP_020939236.1	1551	ENSSSCP00000014740.3	1551	EQ,Sm,Ev,Evlo,	NWD1,NACHT domain- and WD repeat-containing protein 1 isoform X1
hum:XP_016879394.1	1564	Susscr4EVm000036t30	1615	ncbi:XP_020941831.1	1567	ENSSSCP00000025782.2	1569	Ev,Sm,Nc,na	MARF1,meiosis regulator and mRNA stability factor 1 isoform X8
hum:NP_001139806.1	1562	Susscr4EVm001169t1	1418	ncbi:XP_003134919.2	1038	ENSSSCP00000017724.3	1591	Sm,Ev,Nc,Evlo,Ncfr,Nclo,	NACAD,NAC-alpha domain-containing protein 1
hum:NP_115818.2	1562	Susscr4EVm000749t1	1601	ncbi:XP_020923472.1	1562	ENSSSCP00000043620.1	1321	Ev,Nc,Sm,Smlo,	NEURL4,neuralized-like protein 4 isoform 1
hum:XP_011523725.1	1562	Susscr4EVm000804t3	1364	ncbi:XP_020929369.1	1344	ENSSSCP00000011233.3	1344	Ev,Nc,Sm,na	ABCC3,canalicular multispecific organic anion transporter 2 isoform X1
hum:XP_016858191.1	1562	Susscr4EVm000493t29	1554	ncbi:XP_020953298.1	1570	ENSSSCP00000042484.1	1553	Nc,Ev,Sm,na	EIF4G3,eukaryotic translation initiation factor 4 gamma 3 isoform X28
hum:XP_016859147.1	1562	Susscr4EVm000839t4	1550	ncbi:XP_020930806.1	1621	ENSSSCP00000039093.1	1538	Nc,Ev,Sm,na	CLASP1,CLIP-associating protein 1 isoform X2
hum:NP_064592.2	1561	Susscr4EVm000772t1	1579	ncbi:XP_003357745.4	1569	ENSSSCP00000049329.1	1569	Ev,Nc,Sm,na	ERCC6L2,DNA excision repair protein ERCC-6-like 2 isoform a
hum:XP_011513778.1	1561	Susscr4EVm000080t25	1541	ncbi:XP_020935011.1	1541	ENSSSCP00000052424.1	1452	EQ,Nc,Sm,na	TNS3,tensin-3 isoform X2
hum:XP_024304519.1	1561	Susscr4EVm000715t2	1579	ncbi:XP_020940856.1	1581	ENSSSCP00000033897.1	1579	EQ,Ev,Sm,na	MADD,MAP kinase-activating death domain protein isoform X24
hum:NP_004178.2	1560	Susscr4EVm000766t1	1581	ncbi:XP_005673685.1	1561	ENSSSCP00000029482.2	1560	Ev,Nc,Sm,na	KDM5C,lysine-specific demethylase 5C isoform 1
hum:NP_056526.3	1560	Susscr4EVm000757t1	1597	ncbi:XP_020950304.1	1583	ENSSSCP00000024910.2	1467	Ev,Nc,Sm,na	BICRA,BRD4-interacting chromatin-remodeling complex-associated protein
hum:XP_005256997.1	1560	Susscr4EVm000720t9	1577	ncbi:XP_020923748.1	1620	ENSSSCP00000025011.2	1620	EQ,Sm,Ev,na	ABCA8,ATP-binding cassette sub-family A member 8 isoform X1
hum:XP_011517733.1	1560	Susscr4EVm000765t1	1552	ncbi:XP_020938142.1	1543	ENSSSCP00000034119.1	1547	EQ,Sm,Nc,na	DIP2C,disco-interacting protein 2 homolog C isoform X7
hum:XP_016856267.1	1560	Susscr4EVm001414t10	967	ncbi:XP_020953170.1	1557	ENSSSCP00000048193.1	1151	Nc,Sm,Ev,Smlo,Evfr,Evlo,	CAMTA1,calmodulin-binding transcription activator 1 isoform X9
hum:XP_024306812.1	1560	Susscr4EVm000295t27	1568	ncbi:XP_003131813.3	1560	ENSSSCP00000018823.3	1560	EQ,Nc,Sm,na	KIAA0100,protein KIAA0100 isoform X2
hum:XP_005258406.1	1559	Susscr4EVm000718t4	1593	ncbi:XP_020951936.1	1593	ENSSSCP00000057248.1	1414	EQ,Nc,Sm,Smlo,	FHOD3,FH1/FH2 domain-containing protein 3 isoform X6
hum:XP_006711726.1	1559	Susscr4EVm000591t1	1558	ncbi:XP_020945303.1	1558	ENSSSCP00000006886.3	1558	EQ,Nc,Sm,na	ARHGEF11,rho guanine nucleotide exchange factor 11 isoform X8
hum:XP_006715723.1	1559	Susscr4EVm000735t1	1534	ncbi:XP_020958092.1	1559	ENSSSCP00000034817.1	1559	EQ,Sm,Ev,na	THSD7A,thrombospondin type-1 domain-containing protein 7A isoform X3
hum:XP_011509293.1	1558	Susscr4EVm000817t2	1480	ncbi:XP_020930976.1	1443	ENSSSCP00000016955.3	1197	Ev,Nc,Sm,Smlo,	CCDC141,coiled-coil domain-containing protein 141 isoform X1
hum:XP_016866934.1	1558	Susscr4EVm000885t1	1487	ncbi:XP_020954412.1	1487	ENSSSCP00000001828.3	1487	EQ,Nc,Sm,na	ABCC10,multidrug resistance-associated protein 7 isoform X1
hum:NP_001333445.1	1557	Susscr4EVm000796t1	1558	ncbi:XP_020929957.1	1558	ENSSSCP00000040840.1	1558	EQ,Nc,Sm,na	LCOR,ligand-dependent corepressor isoform 3
hum:XP_011532284.1	1557	Susscr4EVm000794t2	1536	ncbi:XP_020927042.1	1599	ENSSSCP00000012787.3	1453	Nc,Ev,Sm,na	ROBO2,roundabout homolog 2 isoform X3
hum:NP_038476.2	1556	Susscr4EVm000778t1	1567	ncbi:NP_001231088.1	1557	ENSSSCP00000002139.2	1557	Ev,Nc,Sm,na	BAZ1A,bromodomain adjacent to zinc finger domain protein 1A isoform a
hum:NP_060023.1	1556	Susscr4EVm000747t1	1598	ncbi:XP_003121636.1	1566	ENSSSCP00000005125.2	1566	Ev,Nc,Sm,na	INO80,DNA helicase INO80
hum:XP_011508065.1	1556	Susscr4EVm002401t1	934	ncbi:XP_020954327.1	1535	ENSSSCP00000006722.2	1499	Nc,Sm,Ev,Evfr,Evlo,	ADCY10,adenylate cyclase type 10 isoform X3
hum:NP_056969.2	1555	Susscr4EVm000537t7	1605	ncbi:XP_013834646.1	1559	ENSSSCP00000015822.3	1559	Ev,Nc,Sm,na	PCF11,pre-mRNA cleavage complex 2 protein Pcf11 isoform 3
hum:NP_064505.1	1555	Susscr4EVm000770t1	1578	ncbi:XP_020931600.1	1557	ENSSSCP00000053141.1	1557	Ev,Nc,Sm,na	UGGT1,UDP-glucose:glycoprotein glucosyltransferase 1 precursor
hum:XP_011535407.1	1554	Susscr4EVm000006t221	1531	ncbi:XP_020950053.1	1559	ENSSSCP00000005106.2	1579	Sm,Nc,Ev,na	SPTB,spectrin beta chain, erythrocytic isoform X2
hum:NP_001307279.1	1553	Susscr4EVm000872t1	1553	ncbi:XP_020927162.1	1560	ENSSSCP00000056248.1	1553	EQ,Ev,Sm,na	TRPM2,transient receptor potential cation channel subfamily M member 2 isoform 2
hum:XP_011507815.3	1553	Susscr4EVm000397t40	1589	ncbi:XP_020919793.1	1585	ENSSSCP00000011549.3	1528	EQ,Nc,Sm,na	MIA3,transport and Golgi organization protein 1 homolog isoform X3
hum:XP_016859149.1	1552	Susscr4EVm000822t1	1566	ncbi:XP_020930806.1	1626	ENSSSCP00000040711.1	1564	Nc,Ev,Sm,na	CLASP1,CLIP-associating protein 1 isoform X4
hum:NP_001139317.1	1551	Susscr4EVm000677t1	1613	ncbi:XP_013837971.1	1615	ENSSSCP00000052686.1	1606	EQ,Ev,Sm,na	ROBO1,roundabout homolog 1 isoform d
hum:NP_059130.2	1551	Susscr4EVm000793t18	1555	ncbi:NP_999164.2	1554	ENSSSCP00000005038.3	1554	EQ,Nc,Sm,na	DUOX1,dual oxidase 1 precursor
hum:NP_059995.2	1551	Susscr4EVm000552t3	1720	ncbi:XP_020920087.1	1746	ENSSSCP00000052145.1	1701	Nc,Ev,Sm,na	CDC42BPG,serine/threonine-protein kinase MRCK gamma
hum:XP_005271385.1	1551	Susscr4EVm000775t1	1572	ncbi:XP_020951558.1	1553	ENSSSCP00000032013.1	1553	Ev,Nc,Sm,na	ZMYM4,zinc finger MYM-type protein 4 isoform X1
hum:XP_006718430.1	1551	Susscr4EVm000320t23	1596	ncbi:XP_020920169.1	1591	ENSSSCP00000011639.3	1596	EQ,Sm,Nc,na	NAV2,neuron navigator 2 isoform X19
hum:XP_011517313.1	1551	Susscr4EVm000808t1	1527	ncbi:XP_003130685.3	1527	ENSSSCP00000047111.1	1527	EQ,Nc,Sm,na	ZCCHC6,terminal uridylyltransferase 7 isoform X1
hum:NP_001335418.1	1549	Susscr4EVm000750t1	1636	ncbi:XP_020928601.1	1672	ENSSSCP00000035737.1	1648	Nc,Sm,Ev,na	RIMS2,regulating synaptic membrane exocytosis protein 2 isoform j
hum:NP_005682.2	1549	Susscr4EVm000710t10	1620	ncbi:XP_005661159.2	1588	ENSSSCP00000018610.3	1620	EQ,Sm,Nc,na	ABCC9,ATP-binding cassette sub-family C member 9 isoform SUR2A
hum:NP_619727.2	1549	Susscr4EVm000798t1	1553	ncbi:XP_003355818.1	1553	ENSSSCP00000033597.1	1553	EQ,Nc,Sm,na	NFAT5,nuclear factor of activated T-cells 5 isoform b
hum:XP_016878726.1	1549	Susscr4EVm000690t17	1590	ncbi:XP_003131623.4	1543	ENSSSCP00000018610.3	1536	Ev,Nc,Sm,na	ABCC1,multidrug resistance-associated protein 1 isoform X1
hum:NP_054799.4	1548	Susscr4EVm000793t5	1563	ncbi:NP_999261.1	1558	ENSSSCP00000005035.3	1558	EQ,Nc,Sm,na	DUOX2,dual oxidase 2 precursor
hum:NP_001129131.1	1547	Susscr4EVm000662t4	1556	ncbi:XP_013851624.2	1556	ENSSSCP00000026569.2	860	EQ,Nc,Sm,Smfr,Smlo,	NRXN1,neurexin-1 isoform alpha2 precursor
hum:XP_016873061.1	1547	Susscr4EVm000056t1	1509	ncbi:XP_013834910.2	1543	ENSSSCP00000058868.1	1507	Nc,Ev,Sm,na	BCL9L,B-cell CLL/lymphoma 9-like protein isoform X1
hum:NP_009054.5	1546	Susscr4EVm000057t75	951	ncbi:XP_020919951.1	1543	ENSSSCP00000051987.1	1548	EQ,Nc,Ev,Evfr,Evlo,	USH2A,usherin isoform A
hum:XP_016870853.1	1546	Susscr4EVm000257t72	1103	ncbi:XP_020936786.1	1101	ENSSSCP00000052153.1	1101	EQ,Nc,Sm,na	SEC16A,protein transport protein Sec16A isoform X18
hum:NP_000383.1	1545	Susscr4EVm000690t2	1580	ncbi:XP_003131623.4	1557	ENSSSCP00000048518.1	1556	Ev,Nc,Sm,na	ABCC2,canalicular multispecific organic anion transporter 1
hum:XP_016869508.1	1545	Susscr4EVm000750t1	1592	ncbi:XP_020928614.1	1652	ENSSSCP00000035737.1	1642	Nc,Sm,Ev,na	RIMS2,regulating synaptic membrane exocytosis protein 2 isoform X20
hum:NP_056128.1	1544	Susscr4EVm000785t1	1561	ncbi:XP_020918641.1	1544	ENSSSCP00000047751.1	1544	Ev,Nc,Sm,na	ARHGEF12,rho guanine nucleotide exchange factor 12 isoform 1
hum:NP_071926.4	1544	Susscr4EVm000806t1	1546	ncbi:XP_020940591.1	1625	ENSSSCP00000015313.3	1546	Nc,Ev,Sm,na	ARAP3,arf-GAP with Rho-GAP domain, ANK repeat and PH domain-containing protein 3
hum:NP_001166902.1	1543	Susscr4EVm000005t35	1578	ncbi:XP_020939012.1	1568	ENSSSCP00000050547.1	1543	Ev,Nc,Sm,na	OBSL1,obscurin-like protein 1 isoform 2 precursor
hum:NP_525021.3	1543	Susscr4EVm000649t11	1554	ncbi:XP_020939938.1	1611	ENSSSCP00000046431.1	1611	EQ,Sm,Ev,na	ABCA10,ATP-binding cassette sub-family A member 10
hum:XP_011509165.1	1543	Susscr4EVm000472t81	1580	ncbi:XP_020939018.1	1580	ENSSSCP00000052588.1	1539	EQ,Nc,Sm,na	OBSL1,obscurin-like protein 1 isoform X7
hum:XP_011524497.1	1543	Susscr4EVm000718t1	1552	ncbi:XP_020951932.1	1552	ENSSSCP00000026817.2	1552	EQ,Nc,Sm,na	FHOD3,FH1/FH2 domain-containing protein 3 isoform X9
hum:XP_011536363.1	1542	Susscr4EVm000449t14	1548	ncbi:XP_020929635.1	1514	ENSSSCP00000010495.3	1478	Ev,Nc,Sm,na	CUX2,homeobox protein cut-like 2 isoform X1
hum:XP_016868239.1	1542	Susscr4EVm000832t1	1557	ncbi:XP_020934504.1	1109	ENSSSCP00000017763.3	1109	Ev,Nc,Sm,Nclo,Smlo,	CDK13,cyclin-dependent kinase 13 isoform X1
hum:NP_001317925.1	1541	Susscr4EVm000783t1	1563	ncbi:XP_020945036.1	1583	ENSSSCP00000040980.1	1543	Nc,Ev,Sm,na	FAM135A,protein FAM135A isoform e
hum:XP_005270739.1	1541	Susscr4EVm000644t8	1577	ncbi:XP_020952299.1	1606	ENSSSCP00000020839.2	1577	Nc,Ev,Sm,na	ZCCHC11,terminal uridylyltransferase 4 isoform X14
hum:XP_006717346.1	1541	Susscr4EVm000808t2	1582	ncbi:XP_003130685.3	1548	ENSSSCP00000047111.1	1548	Ev,Nc,Sm,na	ZCCHC6,terminal uridylyltransferase 7 isoform X2
hum:NP_001338657.1	1540	Susscr4EVm000714t1	1546	ncbi:XP_013834155.1	1541	ENSSSCP00000054291.1	1534	EQ,Nc,Sm,na	RAPGEF2,rap guanine nucleotide exchange factor 2 isoform 4
hum:XP_016868329.1	1540	Susscr4EVm000964t1	1545	ncbi:XP_020958187.1	1545	ENSSSCP00000041559.1	1382	EQ,Nc,Sm,Smlo,	MAGI2,membrane-associated guanylate kinase, WW and PDZ domain-containing protein 2 isoform X1
hum:NP_001098721.1	1539	Susscr4EVm000672t1	1549	ncbi:XP_020940151.1	1549	ENSSSCP00000023261.2	1549	EQ,Nc,Sm,na	ZFYVE16,zinc finger FYVE domain-containing protein 16 isoform a
hum:NP_001136242.1	1539	Susscr4EVm000365t15	1539	ncbi:XP_020929194.1	1462	ENSSSCP00000011114.3	1399	Ev,Nc,Sm,na	PCDH15,protocadherin-15 isoform CD2-2 precursor
hum:XP_011531817.1	1539	Susscr4EVm000839t2	1590	ncbi:XP_020930806.1	1645	ENSSSCP00000039093.1	1582	Nc,Ev,Sm,na	CLASP2,CLIP-associating protein 2 isoform X6
hum:XP_011540993.1	1539	Susscr4EVm000887t1	1339	ncbi:XP_020918825.1	1425	ENSSSCP00000050974.1	1425	EQ,Sm,Ev,na	IGSF9B,protein turtle homolog B isoform X1
hum:XP_016866011.1	1539	Susscr4EVm000750t1	1643	ncbi:XP_020928571.1	1654	ENSSSCP00000004621.3	1628	Nc,Ev,Sm,na	RIMS1,regulating synaptic membrane exocytosis protein 1 isoform X8
hum:XP_016866598.1	1539	Susscr4EVm000084t124	1640	ncbi:XP_020951289.1	1641	ENSSSCP00000003862.3	1640	EQ,Ev,Sm,na	ARID1B,AT-rich interactive domain-containing protein 1B isoform X7
hum:XP_016880630.1	1539	Susscr4EVm000342t5	888	ncbi:XP_020923730.1	1579	ENSSSCP00000058962.1	1088	Nc,Sm,Ev,Smlo,Evfr,Evlo,	MYO15B,myosin XVB isoform X20
hum:NP_001336541.1	1537	Susscr4EVm001414t1	976	ncbi:XP_020953181.1	1539	ENSSSCP00000033820.1	1151	Nc,Sm,Ev,Smlo,Evfr,Evlo,	CAMTA1,calmodulin-binding transcription activator 1 isoform g
hum:XP_011526789.1	1537	Susscr4EVm002637t1	1017	ncbi:XP_013840980.2	1539	ENSSSCP00000008040.3	1527	Nc,Sm,Ev,Evlo,	SYCP2,synaptonemal complex protein 2 isoform X1
hum:XP_006719088.1	1536	Susscr4EVm000732t1	1588	ncbi:XP_005661159.2	1588	ENSSSCP00000018610.3	1607	Sm,Ev,Nc,na	ABCC9,ATP-binding cassette sub-family C member 9 isoform X4
hum:XP_005267748.1	1535	Susscr4EVm000414t4	1563	ncbi:XP_020943178.1	1496	ENSSSCP00000053942.1	1501	Ev,Sm,Nc,na	CCDC88C,protein Daple isoform X3
hum:XP_006718549.1	1535	Susscr4EVm000643t15	1712	ncbi:XP_020938494.1	1630	ENSSSCP00000013812.3	1405	Ev,Nc,Sm,Smlo,	EHBP1L1,EH domain-binding protein 1-like protein 1 isoform X1
hum:XP_016862474.1	1535	Susscr4EVm000677t5	1555	ncbi:XP_020927042.1	1565	ENSSSCP00000052686.1	1535	Nc,Ev,Sm,na	ROBO1,roundabout homolog 1 isoform X9
hum:XP_024307588.1	1535	Susscr4EVm000670t5	1548	ncbi:XP_020953371.1	1586	ENSSSCP00000037329.1	1549	Nc,Sm,Ev,na	PTPRT,receptor-type tyrosine-protein phosphatase T isoform X1
hum:NP_003052.2	1534	Susscr4EVm000802t1	1535	ncbi:XP_020928473.1	1534	ENSSSCP00000011201.3	1534	EQ,Nc,Sm,na	SLIT1,slit homolog 1 protein precursor
hum:XP_016856298.1	1534	Susscr4EVm000644t8	1599	ncbi:XP_020952300.1	1599	ENSSSCP00000020839.2	1599	EQ,Nc,Sm,na	ZCCHC11,terminal uridylyltransferase 4 isoform X16
hum:XP_024302274.1	1534	Susscr4EVm009847t1	342	ncbi:XP_020953252.1	651	0	0	Nc,Ev,Sm,Evfr,Evlo,Smmi,Smlo,	C1orf167,uncharacterized protein C1orf167 isoform X1
hum:XP_005248268.1	1533	Susscr4EVm000802t1	1548	ncbi:XP_020956718.1	1534	ENSSSCP00000011201.3	1513	Ev,Nc,Sm,na	SLIT2,slit homolog 2 protein isoform X1
hum:XP_016868450.1	1533	Susscr4EVm000999t13	1562	ncbi:NP_001107748.1	1560	ENSSSCP00000007946.3	1560	EQ,Nc,Sm,na	NCOA2,nuclear receptor coactivator 2 isoform X1
hum:NP_000019.2	1532	Susscr4EVm000826t1	1532	0	0	ENSSSCP00000050653.1	1541	EQ,Ev,Nc,Ncmi,Nclo,	AGL,glycogen debranching enzyme isoform 1
hum:XP_011523331.1	1532	Susscr4EVm000970t1	1454	ncbi:XP_020922937.1	1540	ENSSSCP00000018701.3	1466	Nc,Sm,Ev,na	TEX14,inactive serine/threonine-protein kinase TEX14 isoform X1
hum:NP_006590.1	1531	Susscr4EVm000798t1	1553	ncbi:XP_005655825.1	1553	ENSSSCP00000029262.2	1553	EQ,Nc,Sm,na	NFAT5,nuclear factor of activated T-cells 5 isoform c
hum:XP_011522859.1	1531	Susscr4EVm000824t1	1563	ncbi:XP_020922520.1	1539	ENSSSCP00000041162.1	1539	Ev,Nc,Sm,na	GPATCH8,G patch domain-containing protein 8 isoform X1
hum:XP_011538877.1	1531	Susscr4EVm000986t1	1399	ncbi:XP_020953256.1	1405	ENSSSCP00000003749.3	1399	EQ,Ev,Sm,na	FHAD1,forkhead-associated domain-containing protein 1 isoform X1
hum:XP_016862479.1	1531	Susscr4EVm000794t2	1578	ncbi:XP_020927046.1	1592	ENSSSCP00000022197.2	1453	Nc,Ev,Sm,na	ROBO2,roundabout homolog 2 isoform X8
hum:XP_016885171.1	1531	Susscr4EVm000294t4	1571	ncbi:XP_020936257.1	1541	ENSSSCP00000041119.1	1541	Ev,Nc,Sm,na	SHROOM4,protein Shroom4 isoform X1
hum:NP_001002912.4	1530	Susscr4EVm000842t1	1576	ncbi:XP_020953276.1	1575	ENSSSCP00000004090.3	734	EQ,Nc,Sm,Smfr,Smlo,	ERICH3,glutamate-rich protein 3
hum:NP_055073.2	1530	Susscr4EVm002637t1	1017	ncbi:XP_013840981.2	1535	ENSSSCP00000008040.3	1534	EQ,Sm,Ev,Evlo,	SYCP2,synaptonemal complex protein 2
hum:NP_775919.3	1530	Susscr4EVm000817t1	1542	ncbi:XP_020930976.1	1531	ENSSSCP00000016955.3	1197	Ev,Nc,Sm,Smlo,	CCDC141,coiled-coil domain-containing protein 141 isoform 1
hum:XP_005270740.1	1530	Susscr4EVm000644t1	1080	ncbi:XP_020952299.1	1077	ENSSSCP00000004175.3	1060	EQ,Nc,Sm,na	ZCCHC11,terminal uridylyltransferase 4 isoform X17
hum:XP_011537442.1	1530	Susscr4EVm000803t1	1599	ncbi:XP_020929802.1	1578	ENSSSCP00000031685.1	1217	Ev,Nc,Sm,Smlo,	SORBS1,sorbin and SH3 domain-containing protein 1 isoform X1
hum:XP_011543459.1	1530	Susscr4EVm000577t17	1562	ncbi:XP_020920079.1	1513	ENSSSCP00000036649.1	1513	Ev,Nc,Sm,na	CDC42BPG,serine/threonine-protein kinase MRCK gamma isoform X4
hum:XP_011541012.1	1529	Susscr4EVm000933t1	1521	ncbi:XP_020918592.1	1557	ENSSSCP00000023724.2	1485	Nc,Ev,Sm,na	PHLDB1,pleckstrin homology-like domain family B member 1 isoform X11
hum:NP_001335010.1	1528	Susscr4EVm000742t10	1528	ncbi:XP_020933373.1	1528	ENSSSCP00000059140.1	1528	EQ,Nc,Sm,na	DLC1,rho GTPase-activating protein 7 isoform 1
hum:XP_024303053.1	1528	Susscr4EVm000376t3	1363	ncbi:XP_020933697.1	1175	ENSSSCP00000056682.1	1532	Sm,Ev,Nc,Evlo,Nclo,	KAT6A,histone acetyltransferase KAT6A isoform X4
hum:NP_003777.2	1527	Susscr4EVm000690t2	1558	ncbi:XP_020929369.1	1533	ENSSSCP00000008407.3	1535	Ev,Sm,Nc,na	ABCC3,canalicular multispecific organic anion transporter 2 isoform 1
hum:XP_005268559.1	1526	Susscr4EVm001020t2	1190	ncbi:XP_020940681.1	1165	ENSSSCP00000015382.3	1165	Ev,Nc,Sm,na	TCOF1,treacle protein isoform X1
hum:XP_016877924.1	1526	Susscr4EVm000594t2	1657	ncbi:XP_020929919.1	1657	ENSSSCP00000033833.1	1657	EQ,Nc,Sm,na	ADAMTSL3,ADAMTS-like protein 3 isoform X5
hum:XP_011523964.1	1525	Susscr4EVm000653t2	1024	ncbi:XP_020920528.1	1024	ENSSSCP00000033068.1	991	EQ,Nc,Sm,na	ANKRD30B,ankyrin repeat domain-containing protein 30B isoform X1
hum:XP_016856650.1	1525	Susscr4EVm000928t1	1454	ncbi:XP_020945855.1	1458	ENSSSCP00000056013.1	1458	EQ,Sm,Ev,na	CCDC18,coiled-coil domain-containing protein 18 isoform X9
hum:NP_001300950.1	1524	Susscr4EVm000820t2	1544	ncbi:XP_020929936.1	1523	ENSSSCP00000058253.1	1523	Ev,Nc,Sm,na	URB2,unhealthy ribosome biogenesis protein 2 homolog
hum:NP_001338656.1	1524	Susscr4EVm000714t1	1530	ncbi:XP_020956964.1	1541	ENSSSCP00000054291.1	1518	Nc,Ev,Sm,na	RAPGEF2,rap guanine nucleotide exchange factor 2 isoform 3
hum:NP_116279.2	1524	Susscr4EVm000754t4	1562	ncbi:XP_020920007.1	1536	ENSSSCP00000052434.1	1536	Ev,Nc,Sm,na	DISP1,protein dispatched homolog 1 isoform 1
hum:NP_001077430.1	1523	Susscr4EVm000811t1	1543	ncbi:XP_020948881.1	1575	ENSSSCP00000003147.2	1543	Nc,Ev,Sm,na	WDR62,WD repeat-containing protein 62 isoform 1
hum:XP_011535239.1	1523	Susscr4EVm000763t10	1579	ncbi:XP_020954966.1	1524	ENSSSCP00000022992.2	1526	Ev,Sm,Nc,na	ARHGEF40,rho guanine nucleotide exchange factor 40 isoform X1
hum:XP_016856300.1	1523	Susscr4EVm000644t1	1080	ncbi:XP_020952300.1	1070	ENSSSCP00000020839.2	1070	Ev,Nc,Sm,na	ZCCHC11,terminal uridylyltransferase 4 isoform X19
hum:XP_016860792.1	1523	Susscr4EVm000662t5	1524	ncbi:XP_013851624.2	1523	ENSSSCP00000036795.1	867	EQ,Nc,Sm,Smfr,Smlo,	NRXN1,neurexin-1 isoform X1
hum:XP_024308656.1	1523	Susscr4EVm000592t1	1635	ncbi:XP_005656461.1	1635	ENSSSCP00000002566.3	1635	EQ,Nc,Sm,na	LTBP1,latent-transforming growth factor beta-binding protein 1 isoform X14
hum:NP_001695.1	1522	Susscr4EVm000773t19	1660	ncbi:XP_013854551.2	1621	ENSSSCP00000039903.1	1621	Ev,Nc,Sm,na	ADGRB3,adhesion G protein-coupled receptor B3
hum:NP_008958.2	1522	Susscr4EVm000779t1	1566	ncbi:XP_020925124.1	1523	ENSSSCP00000027430.2	1523	Ev,Nc,Sm,na	TOPBP1,DNA topoisomerase 2-binding protein 1
hum:XP_011525685.1	1522	Susscr4EVm000292t1	1489	ncbi:XP_020950058.1	1477	ENSSSCP00000002566.3	1460	Ev,Nc,Sm,na	LTBP4,latent-transforming growth factor beta-binding protein 4 isoform X10
hum:XP_016883788.1	1522	Susscr4EVm000667t2	1563	ncbi:XP_020920733.1	1561	ENSSSCP00000050298.1	1557	EQ,Nc,Sm,na	DIP2A,disco-interacting protein 2 homolog A isoform X7
hum:XP_016870471.1	1521	Susscr4EVm000433t10	1508	ncbi:XP_020952529.1	1589	ENSSSCP00000041905.1	1392	Nc,Ev,Sm,Smlo,	PTPRD,receptor-type tyrosine-protein phosphatase delta isoform X27
hum:XP_006724642.1	1520	Susscr4EVm000890t1	1520	ncbi:XP_020935342.1	1563	ENSSSCP00000013116.3	1520	Nc,Ev,Sm,na	IQSEC2,IQ motif and SEC7 domain-containing protein 2 isoform X2
hum:NP_055820.2	1519	Susscr4EVm000774t2	1547	ncbi:XP_020919803.1	1635	ENSSSCP00000002771.3	1523	Nc,Ev,Sm,na	CEP170B,centrosomal protein of 170 kDa protein B isoform 2
hum:XP_016872368.1	1519	Susscr4EVm000505t1	1519	ncbi:XP_003359339.2	1519	ENSSSCP00000042778.1	1519	EQ,Nc,Sm,na	BTAF1,TATA-binding protein-associated factor 172 isoform X6
hum:XP_016882855.1	1519	Susscr4EVm000628t1	1350	ncbi:XP_020939849.1	1378	ENSSSCP00000026892.2	1350	Nc,Ev,Sm,na	DOT1L,histone-lysine N-methyltransferase, H3 lysine-79 specific isoform X4
hum:XP_016858788.1	1518	Susscr4EVm000588t4	1602	ncbi:XP_020921567.1	1599	ENSSSCP00000010191.3	1599	EQ,Nc,Sm,na	COL4A4,collagen alpha-4(IV) chain isoform X9
hum:XP_016863426.1	1518	Susscr4EVm000812t6	1544	ncbi:XP_020939358.1	1538	ENSSSCP00000014643.3	1538	EQ,Nc,Sm,na	ADGRL3,adhesion G protein-coupled receptor L3 isoform X9
hum:XP_016864449.1	1518	Susscr4EVm000771t2	1575	ncbi:XP_020940121.1	1575	ENSSSCP00000014980.3	1575	EQ,Nc,Sm,na	IQGAP2,ras GTPase-activating-like protein IQGAP2 isoform X3
hum:NP_001008537.1	1516	Susscr4EVm000871t1	1498	ncbi:XP_003484179.2	1516	ENSSSCP00000056860.1	1409	Nc,Ev,Sm,na	NEXMIF,neurite extension and migration factor
hum:NP_001129471.1	1516	Susscr4EVm000845t1	1505	ncbi:XP_001927847.1	1505	ENSSSCP00000031225.1	1505	EQ,Nc,Sm,na	RUSC2,iporin isoform 1
hum:NP_001189472.1	1516	Susscr4EVm000449t6	1553	ncbi:XP_020941926.1	1553	ENSSSCP00000008203.3	1312	EQ,Nc,Sm,Smlo,	CUX1,protein CASP isoform d
hum:NP_085059.2	1516	Susscr4EVm000600t2	1520	ncbi:XP_020927190.1	1376	ENSSSCP00000058425.1	1375	Ev,Nc,Sm,na	COL18A1,collagen alpha-1(XVIII) chain isoform 1 preproprotein
hum:XP_016860797.1	1516	Susscr4EVm000662t4	1523	ncbi:XP_020943892.1	1523	ENSSSCP00000036795.1	860	EQ,Nc,Sm,Smfr,Smlo,	NRXN1,neurexin-1 isoform X6
hum:XP_016878661.1	1516	Susscr4EVm002814t1	881	ncbi:XP_020947973.1	1511	ENSSSCP00000000645.3	1511	EQ,Sm,Ev,Evfr,Evlo,	GRIN2A,glutamate receptor ionotropic, NMDA 2A isoform X1
hum:NP_001339572.1	1515	Susscr4EVm000312t1	1566	ncbi:XP_020933561.1	1566	ENSSSCP00000053680.1	1565	EQ,Nc,Sm,na	PCM1,pericentriolar material 1 protein isoform 15
hum:XP_024306029.1	1515	Susscr4EVm000690t17	1597	ncbi:XP_020929369.1	1552	ENSSSCP00000011233.3	1544	Ev,Nc,Sm,na	ABCC6,multidrug resistance-associated protein 6 isoform X6
hum:NP_001122080.1	1514	Susscr4EVm000843t1	1525	ncbi:XP_020953024.1	1518	ENSSSCP00000005108.3	1517	EQ,Nc,Sm,na	MAPKBP1,mitogen-activated protein kinase-binding protein 1 isoform b
hum:XP_011508906.1	1514	Susscr4EVm000483t10	1514	ncbi:XP_020932162.1	1471	ENSSSCP00000016892.3	1330	Ev,Nc,Sm,Smlo,	UBR3,E3 ubiquitin-protein ligase UBR3 isoform X7
hum:XP_024310051.1	1513	Susscr4EVm001451t1	1255	ncbi:XP_020918889.1	1442	ENSSSCP00000046762.1	1442	EQ,Sm,Ev,Evlo,	NFASC,neurofascin isoform X1
hum:NP_001106207.1	1512	Susscr4EVm000593t12	1520	ncbi:XP_003358530.2	1520	ENSSSCP00000025328.2	1520	EQ,Nc,Sm,na	FAM208A,protein TASOR isoform a
hum:NP_004437.2	1512	Susscr4EVm000814t1	1512	ncbi:XP_020919973.1	1519	ENSSSCP00000034014.1	1519	EQ,Sm,Ev,na	EPRS,bifunctional glutamate/proline--tRNA ligase
hum:NP_005912.1	1512	Susscr4EVm000855t1	1513	ncbi:XP_003134021.1	1513	ENSSSCP00000017927.2	1513	EQ,Nc,Sm,na	MAP3K1,mitogen-activated protein kinase kinase kinase 1
hum:NP_065798.2	1512	Susscr4EVm000995t1	1606	ncbi:XP_003121513.1	1588	ENSSSCP00000050442.1	1588	Ev,Nc,Sm,na	ZNF608,zinc finger protein 608
hum:NP_001305660.1	1511	Susscr4EVm000681t3	1507	ncbi:NP_001027526.1	1512	ENSSSCP00000040267.1	1507	EQ,Ev,Sm,na	DNMT1,DNA (cytosine-5)-methyltransferase 1 isoform d
hum:XP_011516351.1	1511	Susscr4EVm000324t7	1585	ncbi:XP_020952203.1	1563	ENSSSCP00000004130.3	1563	Ev,Nc,Sm,na	DOCK8,dedicator of cytokinesis protein 8 isoform X4
hum:XP_011531220.1	1511	Susscr4EVm000819t1	1455	ncbi:XP_020943439.1	1459	ENSSSCP00000055285.1	1459	EQ,Sm,Ev,na	ATAD2B,ATPase family AAA domain-containing protein 2B isoform X1
hum:NP_001291411.1	1510	Susscr4EVm000656t33	1611	ncbi:XP_020924385.1	1567	ENSSSCP00000042659.1	1568	Ev,Sm,Nc,na	PTPN23,tyrosine-protein phosphatase non-receptor type 23 isoform 2
hum:NP_001157859.1	1509	Susscr4EVm000620t1	1560	ncbi:XP_020941067.1	1518	ENSSSCP00000040848.1	1564	EQ,Ev,Nc,na	RAPGEF6,rap guanine nucleotide exchange factor 6 isoform 3
hum:NP_056280.2	1508	Susscr4EVm000255t1	1510	ncbi:XP_005672655.1	1511	ENSSSCP00000036144.1	1510	EQ,Ev,Sm,na	GEMIN5,gem-associated protein 5 isoform 1
hum:XP_006717037.1	1508	0	0	ncbi:XP_020940810.1	1463	ENSSSCP00000059307.1	1518	Sm,Nc,Ev,Evmi,Evlo,	C9orf84,uncharacterized protein C9orf84 isoform X1
hum:NP_001336097.1	1507	Susscr4EVm000835t1	1515	ncbi:XP_020924505.1	1510	ENSSSCP00000048192.1	1491	EQ,Nc,Sm,na	DCAF1,DDB1- and CUL4-associated factor 1 isoform 1
hum:NP_071398.3	1507	Susscr4EVm001511t2	1148	ncbi:XP_020926676.1	1154	ENSSSCP00000012866.3	1103	EQ,Ev,Sm,na	PRDM15,PR domain zinc finger protein 15 isoform 1
hum:XP_005245735.1	1507	Susscr4EVm000697t2	1509	ncbi:XP_005663464.2	1499	ENSSSCP00000052100.1	1498	Ev,Nc,Sm,na	DENND4B,DENN domain-containing protein 4B isoform X2
hum:XP_005260519.1	1507	Susscr4EVm000859t1	1507	ncbi:XP_020933791.1	1510	ENSSSCP00000026795.2	1507	EQ,Ev,Sm,na	RALGAPB,ral GTPase-activating protein subunit beta isoform X1
hum:XP_011524010.1	1507	Susscr4EVm000670t5	1554	ncbi:XP_020953367.1	1554	ENSSSCP00000032447.1	1525	EQ,Nc,Sm,na	PTPRM,receptor-type tyrosine-protein phosphatase mu isoform X7
hum:XP_024308758.1	1507	Susscr4EVm000589t4	1512	ncbi:XP_020931772.1	1512	ENSSSCP00000050061.1	1512	EQ,Nc,Sm,na	MBD5,methyl-CpG-binding domain protein 5 isoform X5
hum:NP_001116105.1	1506	Susscr4EVm000846t10	1500	ncbi:XP_005672216.2	1500	ENSSSCP00000025052.2	1468	EQ,Nc,Sm,na	CPS1,carbamoyl-phosphate synthase [ammonia], mitochondrial isoform a precursor
hum:NP_001265138.1	1506	Susscr4EVm000881t1	1515	ncbi:XP_001926686.1	1497	ENSSSCP00000022498.2	1497	Ev,Nc,Sm,na	NUP153,nuclear pore complex protein Nup153 isoform 1
hum:XP_016881964.1	1506	Susscr4EVm000812t34	1532	ncbi:XP_005656183.1	1515	ENSSSCP00000042209.1	1530	EQ,Sm,Nc,na	ADGRL1,adhesion G protein-coupled receptor L1 isoform X1
hum:XP_005246339.1	1505	Susscr4EVm000641t1	1722	ncbi:XP_020921569.1	1710	ENSSSCP00000010191.3	1537	Ev,Nc,Sm,Smlo,	COL4A4,collagen alpha-4(IV) chain isoform X10
hum:XP_011523061.1	1505	Susscr4EVm004416t1	720	ncbi:XP_013836649.2	1560	ENSSSCP00000052225.1	1353	Nc,Sm,Ev,Smlo,Evfr,Evlo,	EFCAB5,EF-hand calcium-binding domain-containing protein 5 isoform X1
hum:NP_009115.2	1504	Susscr4EVm000243t27	1530	ncbi:XP_005669692.1	1530	ENSSSCP00000012194.3	1528	EQ,Nc,Sm,na	NISCH,nischarin isoform 1
hum:XP_024309044.1	1504	Susscr4EVm000659t4	1545	ncbi:XP_020954569.1	1521	ENSSSCP00000022037.2	1521	Ev,Nc,Sm,na	IQGAP3,ras GTPase-activating-like protein IQGAP3 isoform X5
hum:NP_001162.4	1503	Susscr4EVm000690t17	1585	ncbi:XP_020947901.1	1546	ENSSSCP00000031623.1	1546	Ev,Nc,Sm,na	ABCC6,multidrug resistance-associated protein 6 isoform 1
hum:NP_055731.2	1503	Susscr4EVm000838t4	1495	ncbi:XP_013850810.2	1495	ENSSSCP00000008120.3	1495	EQ,Nc,Sm,na	LMTK2,serine/threonine-protein kinase LMTK2 precursor
hum:NP_001025226.1	1502	Susscr4EVm000844t3	1514	ncbi:XP_013833582.2	1503	ENSSSCP00000052819.1	1503	Ev,Nc,Sm,na	ARHGAP5,rho GTPase-activating protein 5 isoform a
hum:NP_570923.2	1501	Susscr4EVm000433t10	1517	ncbi:XP_020952521.1	1591	ENSSSCP00000039869.1	1516	Nc,Ev,Sm,na	PTPRS,receptor-type tyrosine-protein phosphatase S isoform 3 precursor
hum:XP_011525185.1	1501	Susscr4EVm000757t17	763	ncbi:XP_020950304.1	723	ENSSSCP00000024910.2	1321	Sm,Ev,Nc,Evfr,Evlo,Ncfr,Nclo,	BICRA,BRD4-interacting chromatin-remodeling complex-associated protein isoform X3
hum:XP_016881027.1	1501	Susscr4EVm000336t3	1537	ncbi:XP_001926005.5	1511	ENSSSCP00000037672.1	1511	Ev,Nc,Sm,na	ALPK2,alpha-protein kinase 2 isoform X6
hum:XP_024302436.1	1501	Susscr4EVm000449t4	1658	ncbi:XP_020941924.1	1658	ENSSSCP00000048247.1	1420	EQ,Nc,Sm,Smlo,	CUX1,protein CASP isoform X3
hum:NP_000043.4	1500	Susscr4EVm000869t1	1500	ncbi:XP_003135248.1	1500	ENSSSCP00000013235.3	1500	EQ,Nc,Sm,na	ATP7A,copper-transporting ATPase 1 isoform 1
hum:XP_011519106.1	1500	Susscr4EVm000960t1	1497	ncbi:XP_001927580.3	1497	ENSSSCP00000028508.1	1497	EQ,Nc,Sm,na	PZP,pregnancy zone protein isoform X1
hum:XP_011526100.1	1500	Susscr4EVm000812t34	1526	ncbi:XP_013844308.1	1513	ENSSSCP00000042209.1	1529	EQ,Ev,Nc,na	ADGRL1,adhesion G protein-coupled receptor L1 isoform X3
hum:XP_011532222.1	1500	Susscr4EVm000849t1	1515	ncbi:XP_013837400.2	1469	ENSSSCP00000032718.1	1274	Ev,Nc,Sm,Smlo,	SETD5,SET domain-containing protein 5 isoform X1
hum:NP_004482.4	1499	Susscr4EVm000840t1	1518	ncbi:XP_020950281.1	1500	ENSSSCP00000003363.3	1500	Ev,Nc,Sm,na	ARHGAP35,rho GTPase-activating protein 35
hum:NP_077816.1	1499	Susscr4EVm000875t1	1498	ncbi:XP_020954321.1	1480	ENSSSCP00000054908.1	1499	EQ,Ev,Nc,na	ATP10A,probable phospholipid-transporting ATPase VA
hum:NP_872363.1	1499	Susscr4EVm000056t1	1499	ncbi:XP_003129964.2	1499	ENSSSCP00000058349.1	1499	EQ,Nc,Sm,na	BCL9L,B-cell CLL/lymphoma 9-like protein
hum:XP_016873690.1	1499	Susscr4EVm000760t1	1494	ncbi:XP_020947899.1	1460	ENSSSCP00000055442.1	1460	Ev,Nc,Sm,na	ABCC8,ATP-binding cassette sub-family C member 8 isoform X3
hum:NP_005886.2	1498	Susscr4EVm000868t1	1512	ncbi:XP_020929526.1	1499	ENSSSCP00000010394.3	1499	Ev,Nc,Sm,na	GOLGA3,golgin subfamily A member 3 isoform 1
hum:NP_056076.1	1498	Susscr4EVm000800t4	1576	ncbi:XP_020918829.1	1533	ENSSSCP00000058260.1	1530	Ev,Nc,Sm,na	NCAPD3,condensin-2 complex subunit D3
hum:XP_016881384.1	1498	Susscr4EVm000670t5	1530	ncbi:XP_020953368.1	1534	ENSSSCP00000032447.1	1515	EQ,Ev,Sm,na	PTPRM,receptor-type tyrosine-protein phosphatase mu isoform X2
hum:NP_000485.3	1497	Susscr4EVm000797t2	1532	ncbi:XP_013839164.1	878	ENSSSCP00000024166.2	1544	Sm,Ev,Nc,Ncfr,Nclo,	COL17A1,collagen alpha-1(XVII) chain
hum:XP_011536365.1	1497	Susscr4EVm000449t12	1536	ncbi:XP_020929635.1	1514	ENSSSCP00000010495.3	1478	Ev,Nc,Sm,na	CUX2,homeobox protein cut-like 2 isoform X2
hum:XP_016856651.1	1497	Susscr4EVm000928t1	1454	ncbi:XP_020945854.1	1472	ENSSSCP00000056013.1	1454	Nc,Ev,Sm,na	CCDC18,coiled-coil domain-containing protein 18 isoform X10
hum:NP_003889.1	1496	Susscr4EVm000910t1	1498	ncbi:XP_020942082.1	1498	ENSSSCP00000020455.2	1300	EQ,Nc,Sm,Smlo,	SYNJ2,synaptojanin-2 isoform 1
hum:NP_055671.2	1496	Susscr4EVm000697t4	1509	ncbi:XP_005663464.2	1499	ENSSSCP00000052100.1	1498	Ev,Nc,Sm,na	DENND4B,DENN domain-containing protein 4B
hum:XP_016870803.1	1495	Susscr4EVm000682t4	1422	ncbi:XP_020929919.1	1435	ENSSSCP00000041941.1	1411	Nc,Ev,Sm,na	ADAMTSL1,ADAMTS-like protein 1 isoform X7
hum:XP_024308742.1	1495	Susscr4EVm000805t1	1439	ncbi:XP_003125381.5	1437	ENSSSCP00000009142.3	1437	EQ,Nc,Sm,na	ASXL2,putative Polycomb group protein ASXL2 isoform X1
hum:NP_001342201.1	1494	Susscr4EVm000932t1	1469	ncbi:XP_020917898.1	1501	ENSSSCP00000005460.3	1494	EQ,Sm,Ev,na	LRRC9,leucine-rich repeat-containing protein 9
hum:XP_005262617.1	1494	Susscr4EVm000716t1	1565	ncbi:XP_013841599.1	1554	ENSSSCP00000029482.2	1550	Ev,Nc,Sm,na	KDM5D,lysine-specific demethylase 5D isoform X2
hum:XP_016866359.1	1494	Susscr4EVm001071t1	1382	ncbi:XP_020928164.1	1356	ENSSSCP00000034168.1	1415	Sm,Ev,Nc,na	MAP3K5,mitogen-activated protein kinase kinase kinase 5 isoform X1
hum:XP_016866939.1	1494	Susscr4EVm000732t5	1514	ncbi:XP_020954412.1	1381	ENSSSCP00000001828.3	1381	Ev,Nc,Sm,na	ABCC10,multidrug resistance-associated protein 7 isoform X5
hum:NP_000115.1	1493	Susscr4EVm000873t3	1511	ncbi:XP_020929362.1	1513	ENSSSCP00000011080.3	1500	EQ,Ev,Sm,na	ERCC6,DNA excision repair protein ERCC-6 isoform 2
hum:NP_742066.2	1493	Susscr4EVm000879t1	1493	ncbi:XP_020943232.1	1493	ENSSSCP00000045458.1	1493	EQ,Nc,Sm,na	PLEKHH2,pleckstrin homology domain-containing family H member 2
hum:XP_011509166.1	1493	Susscr4EVm000010t2	1453	ncbi:XP_020958297.1	1453	ENSSSCP00000054333.1	1453	EQ,Nc,Sm,na	OBSL1,obscurin-like protein 1 isoform X8
hum:XP_011532224.1	1493	Susscr4EVm000849t22	1506	ncbi:XP_013837400.2	1493	ENSSSCP00000032718.1	1274	Ev,Nc,Sm,Smlo,	SETD5,SET domain-containing protein 5 isoform X2
hum:XP_016874959.1	1492	Susscr4EVm000889t1	1439	ncbi:XP_013843805.1	1462	ENSSSCP00000026372.2	1437	Nc,Ev,Sm,na	PIK3C2G,phosphatidylinositol 4-phosphate 3-kinase C2 domain-containing subunit gamma isoform X1
hum:NP_001186346.1	1491	Susscr4EVm000703t1	1499	ncbi:XP_020922736.1	1499	ENSSSCP00000039250.1	1227	EQ,Nc,Sm,Smlo,	ARHGAP23,rho GTPase-activating protein 23
hum:NP_056100.2	1490	Susscr4EVm000863t4	1516	ncbi:XP_020949254.1	1490	ENSSSCP00000053870.1	1490	Ev,Nc,Sm,na	WDR7,WD repeat-containing protein 7 isoform 1
hum:NP_057591.2	1490	Susscr4EVm000880t1	1493	ncbi:XP_003131553.1	1493	ENSSSCP00000055304.1	1493	EQ,Nc,Sm,na	CDK12,cyclin-dependent kinase 12 isoform 1
hum:XP_005268287.1	1490	Susscr4EVm000577t4	1508	ncbi:XP_020920089.1	1515	ENSSSCP00000036649.1	1510	EQ,Sm,Ev,na	CDC42BPB,serine/threonine-protein kinase MRCK beta isoform X4
hum:XP_016868746.1	1490	Susscr4EVm000492t20	1543	ncbi:XP_020955875.1	1526	ENSSSCP00000028203.2	1526	Ev,Nc,Sm,na	KIF13B,kinesin-like protein KIF13B isoform X5
hum:XP_016878729.1	1490	Susscr4EVm000804t3	1549	ncbi:XP_003131623.4	1543	ENSSSCP00000018610.3	1536	EQ,Nc,Sm,na	ABCC1,multidrug resistance-associated protein 1 isoform X6
hum:XP_016883195.1	1490	Susscr4EVm000791t1	1546	ncbi:XP_020933085.1	1546	ENSSSCP00000007717.3	1546	EQ,Nc,Sm,na	ASXL1,putative Polycomb group protein ASXL1 isoform X5
hum:NP_001073903.1	1489	Susscr4EVm001359t1	1259	ncbi:XP_005664727.2	1464	ENSSSCP00000020665.2	1460	EQ,Sm,Ev,Evlo,	LMTK3,serine/threonine-protein kinase LMTK3
hum:NP_001284636.1	1489	Susscr4EVm000907t1	1523	ncbi:XP_020920160.1	1491	ENSSSCP00000025093.2	1491	Ev,Nc,Sm,na	CAMSAP2,calmodulin-regulated spectrin-associated protein 2 isoform 1
hum:XP_006715597.1	1489	Susscr4EVm000773t19	1627	ncbi:XP_020951441.1	1621	ENSSSCP00000052943.1	1621	EQ,Nc,Sm,na	ADGRB3,adhesion G protein-coupled receptor B3 isoform X2
hum:NP_056450.2	1487	Susscr4EVm000921t3	1526	ncbi:XP_020924287.1	1518	ENSSSCP00000031347.1	1518	EQ,Nc,Sm,na	GAPVD1,GTPase-activating protein and VPS9 domain-containing protein 1 isoform 4
hum:XP_024306813.1	1487	Susscr4EVm000653t5	650	ncbi:XP_020920535.1	998	ENSSSCP00000043243.1	998	EQ,Sm,Ev,Evfr,Evlo,	CCDC144A,coiled-coil domain-containing protein 144A isoform X1
hum:XP_006711672.2	1486	Susscr4EVm000241t18	1537	ncbi:XP_020940962.1	1535	ENSSSCP00000026430.2	1522	EQ,Nc,Sm,na	NAV1,neuron navigator 1 isoform X9
hum:NP_055506.1	1485	Susscr4EVm000867t1	1505	ncbi:XP_020953930.1	1492	ENSSSCP00000031234.1	1492	Ev,Nc,Sm,na	AQR,intron-binding protein aquarius
hum:XP_016862450.1	1485	Susscr4EVm000979t1	1486	ncbi:XP_020926430.1	1486	ENSSSCP00000012239.3	1370	EQ,Nc,Sm,na	PTPRG,receptor-type tyrosine-protein phosphatase gamma isoform X1
hum:NP_000825.2	1484	Susscr4EVm001739t2	881	ncbi:XP_020942311.1	1502	ENSSSCP00000000645.3	1484	Nc,Sm,Ev,Evfr,Evlo,	GRIN2B,glutamate receptor ionotropic, NMDA 2B precursor
hum:XP_016866361.1	1484	Susscr4EVm001071t2	1375	ncbi:XP_020928164.1	1375	ENSSSCP00000034168.1	1434	Sm,Ev,Nc,na	MAP3K5,mitogen-activated protein kinase kinase kinase 5 isoform X3
hum:NP_001265453.1	1483	Susscr4EVm000882t1	1496	ncbi:XP_013839085.1	1496	ENSSSCP00000011191.1	1496	EQ,Nc,Sm,na	ZNF518A,zinc finger protein 518A isoform a
hum:NP_115784.1	1483	Susscr4EVm000255t3	1488	ncbi:XP_003354545.2	1483	ENSSSCP00000021721.1	1483	EQ,Nc,Sm,na	BAZ1B,tyrosine-protein kinase BAZ1B
hum:NP_002855.2	1482	Susscr4EVm000960t2	1509	ncbi:XP_001927580.3	1504	ENSSSCP00000028508.1	1504	EQ,Nc,Sm,na	PZP,pregnancy zone protein precursor
hum:XP_016881967.1	1482	Susscr4EVm000812t4	1537	ncbi:XP_005656183.1	1491	ENSSSCP00000042209.1	1506	Ev,Sm,Nc,na	ADGRL1,adhesion G protein-coupled receptor L1 isoform X6
hum:NP_001007258.1	1481	Susscr4EVm000298t11	1499	ncbi:XP_020953220.1	1481	ENSSSCP00000042980.1	1130	Ev,Nc,Sm,Smlo,	PRDM2,PR domain zinc finger protein 2 isoform c
hum:NP_001136254.1	1481	Susscr4EVm000834t1	1480	ncbi:XP_001925162.4	1481	ENSSSCP00000032473.1	1481	EQ,Sm,Ev,na	MAGI3,membrane-associated guanylate kinase, WW and PDZ domain-containing protein 3 isoform 1
hum:XP_005247723.1	1481	Susscr4EVm000781t2	1431	ncbi:XP_020925878.1	857	ENSSSCP00000012631.3	859	Ev,Sm,Nc,Smfr,Smlo,Ncfr,Nclo,	HEG1,protein HEG homolog 1 isoform X1
hum:XP_005254465.1	1481	Susscr4EVm000918t1	1481	ncbi:XP_020954741.1	1481	ENSSSCP00000033950.1	1481	EQ,Nc,Sm,na	NEO1,neogenin isoform X3
hum:XP_011543461.1	1481	Susscr4EVm000577t20	1674	ncbi:XP_020920079.1	1649	ENSSSCP00000036649.1	1649	Ev,Nc,Sm,na	CDC42BPG,serine/threonine-protein kinase MRCK gamma isoform X6
hum:XP_016881387.1	1481	Susscr4EVm000670t5	1513	ncbi:XP_020953369.1	1534	ENSSSCP00000032447.1	1498	Nc,Ev,Sm,na	PTPRM,receptor-type tyrosine-protein phosphatase mu isoform X5
hum:NP_000483.3	1480	Susscr4EVm000900t1	1482	ncbi:NP_001098420.1	1482	ENSSSCP00000036792.1	1482	EQ,Nc,Sm,na	CFTR,cystic fibrosis transmembrane conductance regulator
hum:XP_011543627.1	1480	Susscr4EVm000107t169	1503	ncbi:XP_020937678.1	1071	ENSSSCP00000023189.2	1177	Ev,Sm,Nc,Smlo,Nclo,	TNKS1BP1,182 kDa tankyrase-1-binding protein isoform X2
hum:XP_016874061.1	1480	Susscr4EVm000662t5	1473	ncbi:XP_020955620.1	1487	ENSSSCP00000026569.2	863	Nc,Ev,Sm,Smfr,Smlo,	NRXN2,neurexin-2-beta isoform X21
hum:XP_016883078.1	1480	Susscr4EVm002637t1	675	ncbi:XP_020933809.1	1538	ENSSSCP00000008040.3	1525	Nc,Sm,Ev,Evfr,Evlo,	SYCP2,synaptonemal complex protein 2 isoform X6
hum:NP_006030.2	1479	Susscr4EVm000876t29	1519	ncbi:NP_001242898.1	1482	ENSSSCP00000047262.1	1482	Ev,Nc,Sm,na	MRC2,C-type mannose receptor 2 precursor
hum:NP_036425.1	1479	Susscr4EVm000828t3	1524	ncbi:XP_003125453.6	1480	ENSSSCP00000022033.2	1480	Ev,Nc,Sm,na	PXDN,peroxidasin homolog precursor
hum:XP_011520551.1	1479	Susscr4EVm000816t4	1514	ncbi:XP_020952372.1	1519	ENSSSCP00000036500.1	1479	EQ,Ev,Sm,na	PPIP5K1,inositol hexakisphosphate and diphosphoinositol-pentakisphosphate kinase 1 isoform X1
hum:XP_011537286.1	1479	Susscr4EVm000298t10	1465	ncbi:XP_020948647.1	1465	ENSSSCP00000031726.1	1466	EQ,Ev,Nc,na	SCAF11,protein SCAF11 isoform X4
hum:XP_016880658.1	1479	Susscr4EVm000445t53	1230	ncbi:XP_020922729.1	1479	ENSSSCP00000019131.3	1261	Nc,Sm,Ev,Smlo,Evlo,	SRCIN1,SRC kinase signaling inhibitor 1 isoform X1
hum:NP_078789.2	1478	Susscr4EVm000894t1	1493	ncbi:XP_020923852.1	1478	ENSSSCP00000043163.1	1478	Ev,Nc,Sm,na	FYCO1,FYVE and coiled-coil domain-containing protein 1
hum:XP_005252264.1	1478	Susscr4EVm000808t2	1510	ncbi:XP_013845165.1	1484	ENSSSCP00000028981.2	1484	Ev,Nc,Sm,na	ZCCHC6,terminal uridylyltransferase 7 isoform X6
hum:XP_006711673.2	1478	Susscr4EVm000241t21	1538	ncbi:XP_020940962.1	1534	ENSSSCP00000026430.2	1522	EQ,Nc,Sm,na	NAV1,neuron navigator 1 isoform X10
hum:XP_011530891.1	1478	Susscr4EVm002482t2	967	ncbi:XP_020943332.1	1480	ENSSSCP00000039636.1	1472	EQ,Sm,Ev,Evfr,Evlo,	PLB1,phospholipase B1, membrane-associated isoform X1
hum:XP_016868795.1	1477	Susscr4EVm000560t1	1477	ncbi:XP_020944755.1	1477	ENSSSCP00000006511.3	1477	EQ,Nc,Sm,na	VIRMA,protein virilizer homolog isoform X1
hum:XP_016869511.1	1477	Susscr4EVm000750t12	1484	ncbi:XP_020946256.1	1444	ENSSSCP00000035737.1	1331	Ev,Nc,Sm,Smlo,	RIMS2,regulating synaptic membrane exocytosis protein 2 isoform X22
hum:XP_016883805.1	1477	Susscr4EVm000579t1	1492	ncbi:XP_013838006.1	1477	ENSSSCP00000020792.1	1477	Ev,Nc,Sm,na	LTN1,E3 ubiquitin-protein ligase listerin isoform X1
hum:NP_001003700.1	1476	Susscr4EVm000596t7	1485	ncbi:XP_005665609.2	1329	ENSSSCP00000001092.3	1421	Ev,Sm,Nc,Nclo,	RREB1,ras-responsive element-binding protein 1 isoform 3
hum:NP_001339586.1	1476	Susscr4EVm000312t5	1566	ncbi:XP_020933576.1	1566	ENSSSCP00000040634.1	1565	EQ,Nc,Sm,na	PCM1,pericentriolar material 1 protein isoform 22
hum:XP_011515700.1	1476	Susscr4EVm000750t8	1489	ncbi:XP_020928743.1	1534	ENSSSCP00000004621.3	1472	Nc,Ev,Sm,na	RIMS2,regulating synaptic membrane exocytosis protein 2 isoform X23
hum:XP_011523375.1	1476	Susscr4EVm000703t2	1478	ncbi:XP_020922736.1	1475	ENSSSCP00000019133.3	1208	EQ,Nc,Sm,Smlo,	ARHGAP23,rho GTPase-activating protein 23 isoform X1
hum:XP_016879504.1	1476	Susscr4EVm000684t10	1502	ncbi:XP_020939938.1	1594	ENSSSCP00000046431.1	1594	EQ,Sm,Ev,na	ABCA9,ATP-binding cassette sub-family A member 9 isoform X4
hum:XP_011540996.1	1475	Susscr4EVm000887t1	1361	ncbi:XP_020918823.1	1361	ENSSSCP00000050974.1	1339	EQ,Nc,Sm,na	IGSF9B,protein turtle homolog B isoform X4
hum:XP_016857401.1	1475	Susscr4EVm000773t19	1560	ncbi:XP_020928518.1	1601	ENSSSCP00000022151.2	1521	Nc,Ev,Sm,na	ADGRB2,adhesion G protein-coupled receptor B2 isoform X15
hum:XP_011530881.1	1474	Susscr4EVm002482t1	963	ncbi:XP_020943332.1	1358	ENSSSCP00000039636.1	1350	EQ,Sm,Ev,Evlo,	PLB1,phospholipase B1, membrane-associated isoform X2
hum:NP_127497.1	1473	Susscr4EVm001216t1	1239	ncbi:XP_020950729.1	845	ENSSSCP00000003526.3	810	Ev,Nc,Sm,Nclo,Smfr,Smlo,	NLRP1,NACHT, LRR and PYD domains-containing protein 1 isoform 1
hum:NP_149075.2	1471	Susscr4EVm000944t1	1429	ncbi:XP_020924972.1	1429	ENSSSCP00000033780.1	1429	EQ,Nc,Sm,na	FANCD2,Fanconi anemia group D2 protein isoform a
hum:XP_005267901.1	1471	Susscr4EVm000763t2	1520	ncbi:XP_020954966.1	1520	ENSSSCP00000022992.2	1522	EQ,Ev,Nc,na	ARHGEF40,rho guanine nucleotide exchange factor 40 isoform X2
hum:XP_016869512.1	1471	Susscr4EVm000750t5	1460	ncbi:XP_020928749.1	1527	ENSSSCP00000035737.1	1510	Nc,Sm,Ev,na	RIMS2,regulating synaptic membrane exocytosis protein 2 isoform X24
hum:XP_011519931.1	1470	Susscr4EVm000918t2	1481	ncbi:XP_020954741.1	1481	ENSSSCP00000033950.1	1481	EQ,Nc,Sm,na	NEO1,neogenin isoform X1
hum:XP_011527488.1	1470	Susscr4EVm002038t3	1029	ncbi:XP_005657723.1	1020	ENSSSCP00000007598.3	1031	EQ,Ev,Nc,na	NINL,ninein-like protein isoform X1
hum:XP_016874063.1	1470	Susscr4EVm000662t1	1472	ncbi:XP_020955620.1	1487	ENSSSCP00000026569.2	863	Nc,Ev,Sm,Smfr,Smlo,	NRXN2,neurexin-2-beta isoform X23
hum:NP_003077.2	1469	Susscr4EVm000913t2	1497	ncbi:XP_020936799.1	1542	ENSSSCP00000049678.1	1497	Nc,Ev,Sm,na	SNAPC4,snRNA-activating protein complex subunit 4
hum:NP_055736.2	1469	Susscr4EVm000812t4	1536	ncbi:XP_013844308.1	1482	ENSSSCP00000042209.1	1498	Ev,Sm,Nc,na	ADGRL1,adhesion G protein-coupled receptor L1 isoform 2 precursor
hum:NP_056051.2	1469	Susscr4EVm000812t6	1543	ncbi:XP_020939356.1	1536	ENSSSCP00000037086.1	1536	EQ,Nc,Sm,na	ADGRL3,adhesion G protein-coupled receptor L3 isoform 2 precursor
hum:XP_016880919.1	1469	Susscr4EVm000653t11	910	ncbi:XP_020920528.1	869	ENSSSCP00000049144.1	910	EQ,Sm,Nc,na	CCDC144A,coiled-coil domain-containing protein 144A isoform X4
hum:XP_024302907.1	1469	Susscr4EVm000829t6	1521	ncbi:XP_020946067.1	1472	ENSSSCP00000006315.3	1472	Ev,Nc,Sm,na	CPSF1,cleavage and polyadenylation specificity factor subunit 1 isoform X1
hum:NP_001191147.1	1468	Susscr4EVm000931t2	1469	ncbi:XP_020928354.1	1468	ENSSSCP00000056886.1	1468	EQ,Nc,Sm,na	NOS1,nitric oxide synthase, brain isoform 2
hum:NP_001317289.1	1468	Susscr4EVm000923t1	1468	ncbi:XP_020936230.1	1468	ENSSSCP00000045897.1	1468	EQ,Nc,Sm,na	POLA1,DNA polymerase alpha catalytic subunit isoform 1
hum:XP_011530070.1	1468	Susscr4EVm001194t1	1156	ncbi:XP_013838752.1	1156	ENSSSCP00000054248.1	1156	EQ,Nc,Sm,na	PALLD,palladin isoform X1
hum:NP_001309182.1	1467	Susscr4EVm000904t1	1481	ncbi:XP_020924509.1	1468	ENSSSCP00000012174.3	1468	Ev,Nc,Sm,na	RAD54L2,helicase ARIP4 isoform a
hum:XP_005264320.1	1467	Susscr4EVm000369t1	1470	ncbi:XP_005662532.1	1470	ENSSSCP00000056339.1	1465	EQ,Nc,Sm,na	ZNF638,zinc finger protein 638 isoform X4
hum:XP_011510892.1	1467	Susscr4EVm000466t12	1539	ncbi:XP_020946945.1	1509	ENSSSCP00000044696.1	1489	Ev,Nc,Sm,na	PLXND1,plexin-D1 isoform X3
hum:XP_011518868.1	1467	Susscr4EVm000635t1	1563	ncbi:XP_001927580.3	1535	ENSSSCP00000014399.3	1563	EQ,Sm,Nc,na	A2ML1,alpha-2-macroglobulin-like protein 1 isoform X1
hum:XP_011524498.1	1467	Susscr4EVm000718t7	1488	ncbi:XP_020951935.1	1478	ENSSSCP00000022209.2	1478	Ev,Nc,Sm,na	FHOD3,FH1/FH2 domain-containing protein 3 isoform X10
hum:XP_016865395.1	1467	Susscr4EVm000745t2	1454	ncbi:XP_020932639.1	1420	ENSSSCP00000051844.1	1460	EQ,Ev,Nc,na	ADAMTS12,A disintegrin and metalloproteinase with thrombospondin motifs 12 isoform X2
hum:NP_000081.1	1466	Susscr4EVm000607t34	1551	ncbi:XP_003128380.1	1605	ENSSSCP00000001598.3	1496	Nc,Ev,Sm,na	COL3A1,collagen alpha-1(III) chain preproprotein
hum:XP_011535980.1	1466	Susscr4EVm001020t22	1221	ncbi:XP_020940681.1	1220	ENSSSCP00000015382.3	1220	EQ,Nc,Sm,na	TCOF1,treacle protein isoform X7
hum:NP_003961.3	1465	Susscr4EVm000787t1	1476	ncbi:XP_020931561.1	1476	ENSSSCP00000021846.2	1323	EQ,Nc,Sm,Smlo,	MYOM2,myomesin-2
hum:NP_000079.2	1464	Susscr4EVm000607t34	1545	ncbi:NP_001098759.1	1508	ENSSSCP00000055229.1	1482	Ev,Nc,Sm,na	COL1A1,collagen alpha-1(I) chain preproprotein
hum:NP_001276976.1	1464	Susscr4EVm001137t1	1465	ncbi:XP_020948162.1	1465	ENSSSCP00000000814.3	1370	EQ,Nc,Sm,na	CECR2,cat eye syndrome critical region protein 2 isoform 1
hum:NP_055869.1	1464	Susscr4EVm000962t1	1525	ncbi:XP_003126741.3	1464	ENSSSCP00000049469.1	1464	Ev,Nc,Sm,na	UHRF1BP1L,UHRF1-binding protein 1-like isoform a
hum:XP_011531724.1	1464	Susscr4EVm000833t1	1479	ncbi:XP_005669866.2	1479	ENSSSCP00000012362.3	1479	EQ,Nc,Sm,na	FGD5,FYVE, RhoGEF and PH domain-containing protein 5 isoform X1
hum:NP_001336053.1	1463	Susscr4EVm000883t1	1467	ncbi:XP_003132182.3	1467	ENSSSCP00000056176.1	1472	EQ,Ev,Nc,na	NKTR,NK-tumor recognition protein isoform c
hum:NP_001337627.1	1463	Susscr4EVm000812t4	1503	ncbi:XP_020939356.1	1481	ENSSSCP00000037086.1	1480	Ev,Nc,Sm,na	ADGRL2,adhesion G protein-coupled receptor L2 isoform 5 precursor
hum:NP_031392.3	1463	Susscr4EVm000648t20	1485	ncbi:XP_020923800.1	1502	ENSSSCP00000047262.1	1491	Nc,Sm,Ev,na	PLA2R1,secretory phospholipase A2 receptor isoform 1 precursor
hum:XP_005256351.1	1463	Susscr4EVm000728t4	1400	ncbi:XP_020952657.1	1428	ENSSSCP00000024541.2	1400	Nc,Ev,Sm,na	FANCA,Fanconi anemia group A protein isoform X1
hum:XP_005257820.1	1463	Susscr4EVm000710t10	1530	ncbi:XP_003131623.4	1530	ENSSSCP00000018610.3	1528	EQ,Nc,Sm,na	ABCC3,canalicular multispecific organic anion transporter 2 isoform X3
hum:NP_001028229.1	1462	Susscr4EVm000898t1	1493	ncbi:XP_020926444.1	1495	ENSSSCP00000051415.1	1267	EQ,Ev,Sm,Smlo,	MAGI1,membrane-associated guanylate kinase, WW and PDZ domain-containing protein 1 isoform c
hum:NP_005376.2	1462	Susscr4EVm000883t2	1467	ncbi:XP_005669463.1	1467	ENSSSCP00000056176.1	1471	EQ,Ev,Nc,na	NKTR,NK-tumor recognition protein isoform a
hum:NP_055529.2	1462	Susscr4EVm000955t1	1438	ncbi:XP_020942503.1	1430	ENSSSCP00000008565.3	1430	EQ,Nc,Sm,na	IFT140,intraflagellar transport protein 140 homolog
hum:XP_011518973.1	1462	Susscr4EVm000674t5	1492	ncbi:XP_020938378.1	1476	ENSSSCP00000022247.2	1466	Ev,Nc,Sm,na	LRP6,low-density lipoprotein receptor-related protein 6 isoform X2
hum:NP_056018.2	1461	Susscr4EVm000915t3	1465	ncbi:XP_003355246.1	1462	ENSSSCP00000038612.1	1462	EQ,Nc,Sm,na	RPRD2,regulation of nuclear pre-mRNA domain-containing protein 2 isoform 1
hum:NP_079429.2	1461	Susscr4EVm000938t1	1465	ncbi:XP_020932561.1	1465	ENSSSCP00000037987.1	1465	EQ,Nc,Sm,na	ATP10B,probable phospholipid-transporting ATPase VB
hum:NP_870998.2	1461	Susscr4EVm000858t1	1482	ncbi:XP_003355974.3	1482	ENSSSCP00000053312.1	1476	EQ,Nc,Sm,na	PRX,periaxin isoform 2
hum:NP_001341227.1	1460	Susscr4EVm000921t1	1491	ncbi:XP_020924287.1	1518	ENSSSCP00000031347.1	1518	EQ,Sm,Ev,na	GAPVD1,GTPase-activating protein and VPS9 domain-containing protein 1 isoform 8
hum:NP_073752.5	1460	Susscr4EVm000860t1	1461	ncbi:XP_020950488.1	1476	ENSSSCP00000040965.1	1461	Nc,Ev,Sm,na	RFX7,DNA-binding protein RFX7
hum:XP_005248611.1	1460	Susscr4EVm000942t1	1462	ncbi:XP_020932447.1	1462	ENSSSCP00000017962.3	1462	EQ,Nc,Sm,na	ERBIN,erbin isoform X1
hum:XP_024305281.1	1459	Susscr4EVm000269t8	1469	ncbi:XP_020955078.1	1460	ENSSSCP00000002529.3	1460	EQ,Nc,Sm,na	PCNX1,pecanex-like protein 1 isoform X9
hum:XP_011517864.2	1458	Susscr4EVm000445t26	1420	ncbi:XP_020919888.1	1198	ENSSSCP00000011811.3	1086	Ev,Nc,Sm,Nclo,Smlo,	KIAA1217,sickle tail protein homolog isoform X14
hum:XP_011529580.1	1458	Susscr4EVm000353t9	1513	ncbi:XP_013839998.1	1517	ENSSSCP00000040712.1	1543	Sm,Nc,Ev,na	DOCK11,dedicator of cytokinesis protein 11 isoform X4
hum:XP_016862451.1	1458	Susscr4EVm000979t1	1458	ncbi:XP_020926426.1	1458	ENSSSCP00000012239.3	1370	EQ,Nc,Sm,na	PTPRG,receptor-type tyrosine-protein phosphatase gamma isoform X2
hum:XP_016878228.1	1458	Susscr4EVm000816t4	1506	ncbi:XP_020952377.1	1507	ENSSSCP00000036500.1	1479	EQ,Ev,Sm,na	PPIP5K1,inositol hexakisphosphate and diphosphoinositol-pentakisphosphate kinase 1 isoform X3
hum:XP_024310034.1	1458	Susscr4EVm000856t1	1445	ncbi:XP_020956593.1	1440	ENSSSCP00000023441.2	1277	EQ,Nc,Sm,Smlo,	FAM193A,protein FAM193A isoform X4
hum:NP_443066.2	1457	Susscr4EVm000863t1	1503	ncbi:XP_020949254.1	1490	ENSSSCP00000053870.1	1490	Ev,Nc,Sm,na	WDR7,WD repeat-containing protein 7 isoform 2
hum:NP_002429.1	1456	Susscr4EVm000876t29	1495	ncbi:XP_020923800.1	1480	ENSSSCP00000032832.1	1497	EQ,Ev,Nc,na	MRC1,macrophage mannose receptor 1 precursor
hum:NP_000126.2	1455	Susscr4EVm000728t2	1436	ncbi:XP_020952657.1	1480	ENSSSCP00000024541.2	1452	Nc,Sm,Ev,na	FANCA,Fanconi anemia group A protein isoform a
hum:NP_001193767.1	1455	Susscr4EVm000273t1	1463	ncbi:XP_013841129.1	1463	ENSSSCP00000012239.3	1046	EQ,Nc,Sm,Smlo,	PTPRZ1,receptor-type tyrosine-protein phosphatase zeta isoform 2 precursor
hum:XP_016876073.1	1455	Susscr4EVm000557t31	1425	ncbi:XP_020921351.1	1516	ENSSSCP00000049501.1	1439	Nc,Sm,Ev,na	LMO7,LIM domain only protein 7 isoform X5
hum:NP_004220.2	1454	Susscr4EVm000930t2	1454	ncbi:XP_003135073.1	1454	ENSSSCP00000013036.3	1454	EQ,Nc,Sm,na	MED14,mediator of RNA polymerase II transcription subunit 14
hum:XP_016869513.1	1454	Susscr4EVm000750t4	1478	ncbi:XP_020928743.1	1534	ENSSSCP00000004621.3	1455	Nc,Ev,Sm,na	RIMS2,regulating synaptic membrane exocytosis protein 2 isoform X26
hum:NP_001035197.1	1453	Susscr4EVm000919t1	1459	ncbi:XP_005656475.1	1459	ENSSSCP00000045903.1	1459	EQ,Nc,Sm,na	MLH3,DNA mismatch repair protein Mlh3 isoform 1
hum:XP_011537116.1	1453	Susscr4EVm000897t1	1485	ncbi:XP_020946919.1	1470	0	0	Ev,Nc,Sm,Smmi,Smlo,	EEA1,early endosome antigen 1 isoform X1
hum:XP_011543518.1	1452	Susscr4EVm000003t42	1371	ncbi:XP_005665924.1	1371	ENSSSCP00000033447.1	1404	Sm,Ev,Nc,na	SPTBN2,spectrin beta chain, non-erythrocytic 2 isoform X3
hum:XP_016855481.1	1452	Susscr4EVm000670t2	1515	ncbi:XP_020953371.1	1569	ENSSSCP00000037329.1	1532	Nc,Sm,Ev,na	PTPRU,receptor-type tyrosine-protein phosphatase U isoform X1
hum:XP_016856341.1	1451	Susscr4EVm001291t1	1402	ncbi:XP_020920141.1	1451	ENSSSCP00000011618.3	1451	EQ,Sm,Ev,na	CRB1,protein crumbs homolog 1 isoform X5
hum:XP_016872883.1	1451	Susscr4EVm000887t2	1322	ncbi:XP_020918827.1	1322	ENSSSCP00000050974.1	1299	EQ,Nc,Sm,na	IGSF9B,protein turtle homolog B isoform X5
hum:XP_016873276.1	1451	Susscr4EVm000342t5	1441	ncbi:XP_020931812.1	1437	ENSSSCP00000016813.3	1437	EQ,Nc,Sm,na	MYO7A,unconventional myosin-VIIa isoform X13
hum:NP_001035207.1	1450	Susscr4EVm000936t1	1457	ncbi:XP_020957942.1	1457	ENSSSCP00000026120.2	1454	EQ,Nc,Sm,na	ARAP1,arf-GAP with Rho-GAP domain, ANK repeat and PH domain-containing protein 1 isoform c
hum:NP_001269058.1	1450	Susscr4EVm000972t1	1451	ncbi:XP_020923177.1	1451	ENSSSCP00000033580.1	1390	EQ,Nc,Sm,na	SSH2,protein phosphatase Slingshot homolog 2 isoform 1
hum:XP_011535124.1	1450	Susscr4EVm000303t33	1452	ncbi:XP_020957337.1	1435	ENSSSCP00000051119.1	1342	Ev,Nc,Sm,na	NIN,ninein isoform X3
hum:XP_005268564.1	1449	Susscr4EVm001020t10	1415	ncbi:XP_020940681.1	1415	ENSSSCP00000015382.3	1415	EQ,Nc,Sm,na	TCOF1,treacle protein isoform X8
hum:XP_005266355.1	1448	Susscr4EVm000903t1	1449	ncbi:XP_020921216.1	1449	ENSSSCP00000034360.1	1449	EQ,Nc,Sm,na	PDS5B,sister chromatid cohesion protein PDS5 homolog B isoform X1
hum:XP_011515537.1	1448	Susscr4EVm000343t10	1368	ncbi:XP_020944612.1	1434	ENSSSCP00000059037.1	1403	Nc,Sm,Ev,na	FER1L6,fer-1-like protein 6 isoform X4
hum:NP_000255.2	1447	Susscr4EVm000683t2	1452	ncbi:XP_003482848.1	1452	ENSSSCP00000028104.2	1452	EQ,Nc,Sm,na	PTCH1,protein patched homolog 1 isoform L
hum:NP_937872.1	1447	Susscr4EVm000899t2	1448	ncbi:XP_020956464.1	1298	ENSSSCP00000009272.3	1220	Ev,Nc,Sm,Nclo,Smlo,	RGS12,regulator of G-protein signaling 12 isoform 1
hum:XP_011529130.1	1447	Susscr4EVm000716t1	1455	ncbi:XP_005673685.1	1441	ENSSSCP00000041095.1	1442	Ev,Sm,Nc,na	KDM5C,lysine-specific demethylase 5C isoform X6
hum:XP_011532286.1	1447	Susscr4EVm000794t10	1465	ncbi:XP_020927042.1	1514	ENSSSCP00000052686.1	1321	Nc,Ev,Sm,Smlo,	ROBO2,roundabout homolog 2 isoform X12
hum:XP_016881498.1	1447	Susscr4EVm000718t8	1469	ncbi:XP_020951939.1	1451	ENSSSCP00000057248.1	1451	Ev,Nc,Sm,na	FHOD3,FH1/FH2 domain-containing protein 3 isoform X11
hum:NP_775839.3	1446	Susscr4EVm001580t1	1200	ncbi:XP_005670432.2	1449	ENSSSCP00000021831.2	1449	EQ,Sm,Ev,Evlo,	UMODL1,uromodulin-like 1 isoform 2 precursor
hum:XP_016875213.1	1446	Susscr4EVm000309t5	1470	ncbi:XP_001926902.5	1423	ENSSSCP00000000535.3	1423	Ev,Nc,Sm,na	PTPRB,receptor-type tyrosine-protein phosphatase beta isoform X4
hum:NP_073585.8	1445	Susscr4EVm000080t25	1452	ncbi:XP_013841250.2	1452	ENSSSCP00000052424.1	1452	EQ,Nc,Sm,na	TNS3,tensin-3
hum:NP_849150.3	1445	Susscr4EVm000730t2	1247	ncbi:XP_020940719.1	1429	ENSSSCP00000056301.1	1522	Sm,Nc,Ev,Evlo,	SPATA31E1,spermatogenesis-associated protein 31E1
hum:XP_011508975.1	1445	0	0	ncbi:XP_020931065.1	1445	ENSSSCP00000016997.3	1457	Sm,Nc,Ev,Evmi,Evlo,	ANKAR,ankyrin and armadillo repeat-containing protein isoform X1
hum:XP_016862483.1	1445	Susscr4EVm000794t6	1463	ncbi:XP_020927044.1	1512	ENSSSCP00000052686.1	1321	Nc,Ev,Sm,Smlo,	ROBO2,roundabout homolog 2 isoform X13
hum:NP_001316727.1	1444	Susscr4EVm000902t1	1431	ncbi:XP_020942456.1	1393	ENSSSCP00000043052.1	1393	Ev,Nc,Sm,na	PLEKHG1,pleckstrin homology domain-containing family G member 1 isoform a
[truncated: 31,606 more rows]
